# Supplementary material for: The suitability of structural soil for the development of trees growing in urban areas
Source: PeerJ. 2026 Feb 20;14:e20407. doi: 10.7717/peerj.20407 (PMC12927605; doi:10.7717/peerj.20407)
Supplement: Supplemental Information 1 [file peerj-14-20407-s001.xlsx]

## Sheet: Arkusz1 (2)
term	soil	ID tree	Chl	Flav	Anth	NBI
07_21	SS	1	31.585	1.815	0.096	17.4
07_21	SS	1	29.127	1.518	0.125	19.19
07_21	SS	1	27.557	1.974	0.13	13.96
07_21	SS	1	27.412	2.523	0.108	10.86
07_21	SS	1	27.089	2.307	0.096	11.74
07_21	SS	1	29.966	2.507	0.173	11.95
07_21	SS	1	33.49	2.676	0.087	12.52
07_21	SS	1	31.866	2.487	0.113	12.81
07_21	SS	1	29.7615	2.22588	0.116	13.8038
07_21	SS	2	20.929	2.781	0.169	7.52
07_21	SS	2	19.905	2.555	0.152	7.79
07_21	SS	2	20.946	2.629	0.143	7.97
07_21	SS	2	17.683	2.747	0.205	6.44
07_21	SS	2	18.035	2.89	0.218	6.24
07_21	SS	2	16.679	2.8	0.205	5.96
07_21	SS	2	19.4	2.662	0.186	7.29
07_21	SS	2	19.448	2.686	0.192	7.24
07_21	SS	2	19.1281	2.71875	0.18375	7.05625
07_21	SS	3	28.003	1.62	0.094	17.28
07_21	SS	3	24.311	0.571	0.117	42.58
07_21	SS	3	27.156	0.523	0.078	51.95
07_21	SS	3	31.386	2.359	0.066	13.31
07_21	SS	3	28.044	1.292	0.055	21.71
07_21	SS	3	26.34	1.295	0.063	20.34
07_21	SS	3	27.119	1.741	0.088	15.58
07_21	SS	3	29.171	2.386	0.067	12.23
07_21	SS	3	26.245	2.505	0.13	10.48
07_21	SS	4	31.808	3.498	0.121	9.09
07_21	SS	4	27.088	1.024	0.078	26.46
07_21	SS	4	28.821	1.804	0.075	15.98
07_21	SS	4	27.05	1.132	0.092	23.89
07_21	SS	4	21.562	1.267	0.127	17.02
07_21	SS	4	19.564	1.215	0.145	16.1
07_21	SS	4	27.513	1.717	0.106	16.03
07_21	SS	4	24.728	2.373	0.152	10.42
07_21	SS	4	23.225	2.254	0.156	10.3
07_21	SS	5	21.228	2.563	0.129	8.28
07_21	SS	5	26.596	1.713	0.115	15.53
07_21	SS	5	26.908	1.757	0.113	15.31
07_21	SS	5	28.995	1.629	0.127	17.8
07_21	SS	5	27.484	1.002	0.124	27.43
07_21	SS	5	28.042	1.466	0.103	19.13
07_21	SS	5	28.068	1.955	0.128	14.35
07_21	SS	5	24.004	1.652	0.135	14.53
07_21	SS	5	25.553	1.824	0.134	14.01
07_21	SS	6	21.937	1.332	0.108	16.47
07_21	SS	6	22.772	1.308	0.146	17.41
07_21	SS	6	21.804	1.248	0.169	17.47
07_21	SS	6	22.271	2.867	0.217	7.77
07_21	SS	6	21.264	2.296	0.189	9.26
07_21	SS	6	23.469	2.503	0.114	9.38
07_21	SS	6	23.967	2.759	0.167	8.69
07_21	SS	6	24.383	2.786	0.137	8.75
07_21	SS	6	22.7334	2.13738	0.155875	11.9
07_21	SS	7	26.748	1.576	0.116	16.97
07_21	SS	7	26.418	0.849	0.08	31.11
07_21	SS	7	26.087	1.269	0.099	20.56
07_21	SS	7	24.718	2.011	0.114	12.29
07_21	SS	7	23.765	2.033	0.116	11.69
07_21	SS	7	25.696	1.43	0.1	17.96
07_21	SS	7	23.789	1.855	0.11	12.82
07_21	SS	7	24.312	1.554	0.137	15.64
07_21	SS	7	25.1916	1.57212	0.109	17.38
07_21	SS	8	23.986	2.152	0.123	11.15
07_21	SS	8	24.101	1.54	0.111	15.65
07_21	SS	8	24.869	1.317	0.105	18.88
07_21	SS	8	24.708	1.289	0.106	19.17
07_21	SS	8	25.634	2.162	0.125	11.85
07_21	SS	8	24.846	2.291	0.117	10.85
07_21	SS	8	22.748	2.242	0.121	10.15
07_21	SS	8	22.836	2.704	0.186	8.44
07_21	SS	8	22.078	2.727	0.179	8.1
07_21	C	9	27.175	1.659	0.1	16.38
07_21	C	9	26.172	1.928	0.118	13.58
07_21	C	9	24.642	1.068	0.119	23.07
07_21	C	9	27.407	1.353	0.12	20.26
07_21	C	9	30.449	2.841	0.087	10.72
07_21	C	9	29.636	1.994	0.087	14.86
07_21	C	9	27.671	2.319	0.124	11.93
07_21	C	9	28.996	2.529	0.108	11.46
07_21	C	9	27.769	1.961	0.0108	15.28
07_21	C	10	28.228	1.02	0.063	27.68
07_21	C	10	32.278	1.914	0.047	16.87
07_21	C	10	27.601	0.638	0.102	43.25
07_21	C	10	30.262	2.307	0.104	13.12
07_21	C	10	31.473	2.611	0.093	12.05
07_21	C	10	34.903	2.645	0.139	13.2
07_21	C	10	34.494	2.814	0.076	12.26
07_21	C	10	32.177	2.735	0.071	11.77
07_21	C	10	30.817	2.771	0.097	11.12
07_21	C	11	28.053	1.364	0.083	20.57
07_21	C	11	27.957	1.572	0.056	17.79
07_21	C	11	28.126	1.592	0.104	17.67
07_21	C	11	28.739	1.868	0.11	15.38
07_21	C	11	29.164	2.205	0.108	13.22
07_21	C	11	27.502	1.601	0.103	17.18
07_21	C	11	26.713	1.37	0.094	19.49
07_21	C	11	28.708	1.433	0.104	20.04
07_21	C	11	27.51	1.461	0.085	18.83
07_21	C	12	29.896	1.906	0.093	15.68
07_21	C	12	27.839	0.91	0.07	30.59
07_21	C	12	28.033	0.935	0.072	29.99
07_21	C	12	25.747	1.011	0.095	25.46
07_21	C	12	26.346	1.714	0.114	15.37
07_21	C	12	28.556	2.237	0.112	12.77
07_21	C	12	26.888	2.369	0.108	11.35
07_21	C	12	28.928	2.7	0.11	10.71
07_21	C	12	27.858	2.52	0.104	11.06
07_21	C	13	25.6	1.801	0.089	14.21
07_21	C	13	28.649	1.156	0.072	24.79
07_21	C	13	28.902	1.4	0.05	20.64
07_21	C	13	28.632	1.923	0.048	14.89
07_21	C	13	29.857	2.474	0.096	12.07
07_21	C	13	26.538	2.435	0.102	10.9
07_21	C	13	32.151	3	0.081	10.72
07_21	C	13	28.687	3.101	0.102	9.25
07_21	C	13	27.792	2.836	0.062	9.8
07_21	C	14	27.652	1.614	0.094	17.14
07_21	C	14	29.585	1.825	0.088	16.21
07_21	C	14	29.313	1.623	0.068	18.07
07_21	C	14	26.033	2.505	0.112	10.39
07_21	C	14	24.11	1.89	0.115	12.76
07_21	C	14	26.676	1.977	0.086	13.49
07_21	C	14	31.713	2.495	0.1	12.71
07_21	C	14	32.845	2.774	0.068	11.84
07_21	C	14	28.4909	2.08788	0.091375	14.0763
07_21	C	15	27.614	1.645	0.104	16.79
07_21	C	15	29.63	0.775	0.076	38.23
07_21	C	15	33.708	1.556	0.055	21.67
07_21	C	15	33.921	2.009	0.038	16.89
07_21	C	15	32.612	2.016	0.072	16.18
07_21	C	15	31.08	2.566	0.066	12.11
07_21	C	15	30.672	2.961	0.103	10.36
07_21	C	15	31.473	3.238	0.085	9.72
07_21	C	15	31.3387	2.09575	0.074875	17.7437
07_21	C	16	32.622	1.375	0.057	23.72
07_21	C	16	33.13	1.228	0.052	26.99
07_21	C	16	28.393	2.089	0.091	13.59
07_21	C	16	25.73	2.686	0.11	9.58
07_21	C	16	30.288	2.059	0.083	14.71
07_21	C	16	28.963	1.911	0.074	15.15
07_21	C	16	25.032	1.855	0.109	13.5
07_21	C	16	21.703	1.406	0.088	15.44
07_21	C	16	23.74	1.464	0.1	16.22
07_21	CS	17	26.267	1.623	0.099	16.19
07_21	CS	17	27.131	1.323	0.075	20.51
07_21	CS	17	28.281	1.723	0.076	16.42
07_21	CS	17	24.371	1.788	0.13	13.63
07_21	CS	17	21.324	1.636	0.121	13.04
07_21	CS	17	23.432	1.637	0.11	14.32
07_21	CS	17	23.961	2.459	0.108	9.75
07_21	CS	17	25.411	2.736	0.129	9.29
07_21	CS	17	26.374	2.532	0.137	10.42
07_21	CS	18	33.045	1.013	0.066	32.61
07_21	CS	18	29.478	1.05	0.102	28.08
07_21	CS	18	29.503	2.685	0.14	10.99
07_21	CS	18	23.237	3.36	0.126	6.92
07_21	CS	18	26.707	1.383	0.081	19.3
07_21	CS	18	26.231	2.721	2.475	9.64
07_21	CS	18	27.058	2.933	0.126	9.23
07_21	CS	18	27.264	3.101	0.131	8.79
07_21	CS	18	27.8154	2.28075	0.405875	15.695
07_21	CS	19	27.983	2.363	0.057	11.84
07_21	CS	19	27.246	1.73	0.104	15.75
07_21	CS	19	27.485	1.591	0.126	17.28
07_21	CS	19	26.491	1.398	0.131	18.95
07_21	CS	19	24.37	1.041	0.1	23.42
07_21	CS	19	26.402	1.13	0.074	23.36
07_21	CS	19	27.215	1.645	0.078	16.54
07_21	CS	19	28.241	2.516	0.112	11.22
07_21	CS	19	26.179	2.627	0.121	9.97
07_21	CS	20	27.242	2.26	0.069	12.05
07_21	CS	20	27.312	1.979	0.069	13.8
07_21	CS	20	28.033	1.757	0.053	15.96
07_21	CS	20	25.629	1.558	0.102	16.45
07_21	CS	20	26.882	2.137	0.125	12.58
07_21	CS	20	26.189	2.403	0.134	10.9
07_21	CS	20	22.651	2.702	0.144	8.38
07_21	CS	20	24.15	3.232	0.143	7.47
07_21	CS	20	22.582	1.216	0.109	18.57
07_21	CS	21	27.086	2.016	0.081	13.44
07_21	CS	21	27.923	1.249	0.074	22.36
07_21	CS	21	25.99	0.853	0.064	30.48
07_21	CS	21	27.318	2.022	0.087	13.51
07_21	CS	21	28.413	2.718	0.126	10.45
07_21	CS	21	30.89	2.936	0.141	10.52
07_21	CS	21	29.555	2.794	0.102	10.58
07_21	CS	21	28.313	2.92	0.08	9.7
07_21	CS	21	28.745	2.973	0.075	9.67
07_21	CS	22	25.927	2.074	0.112	12.5
07_21	CS	22	29.438	1.568	0.071	18.78
07_21	CS	22	31.763	2.104	0.078	15.1
07_21	CS	22	31.155	2.64	0.096	11.8
07_21	CS	22	32.795	3.091	0.342	10.61
07_21	CS	22	31.181	2.951	0.112	10.57
07_21	CS	22	28.467	3.074	0.091	9.26
07_21	CS	22	26.93	3.283	0.106	8.2
07_21	CS	22	29.707	2.59813	0.126	12.1025
07_21	CS	23	29.496	1.544	0.081	19.11
07_21	CS	23	35.846	1.903	0.053	18.84
07_21	CS	23	38.65	1.743	0.052	22.17
07_21	CS	23	33.136	2.369	0.076	13.99
07_21	CS	23	34.482	2.191	0.022	15.74
07_21	CS	23	31.549	2.033	0.057	15.52
07_21	CS	23	29.246	2.669	0.082	10.96
07_21	CS	23	27.036	2.706	0.1	9.99
07_21	CS	23	32.4301	2.14475	0.065375	15.79
07_21	CS	24	29.687	2.242	0.067	13.24
07_21	CS	24	29.582	1.277	0.062	23.17
07_21	CS	24	29.756	1.423	0.068	20.91
07_21	CS	24	27.354	2.246	0.117	12.18
07_21	CS	24	28.785	2.371	0.12	12.14
07_21	CS	24	26.724	2.706	0.104	9.87
07_21	CS	24	26.954	2.619	0.114	10.29
07_21	CS	24	27.228	2.769	0.131	9.83
07_21	CS	24	25.357	2.911	0.146	8.71
07_21	AS	25	16.464	1.16	0.196	14.19
07_21	AS	25	20.812	1.488	0.171	13.99
07_21	AS	25	22.649	2.253	0.153	10.05
07_21	AS	25	21.108	2.704	0.193	7.81
07_21	AS	25	22.991	3.005	0.149	7.65
07_21	AS	25	18.974	3.085	0.185	6.15
07_21	AS	25	20.4997	2.2825	0.1745	9.97333
07_21	AS	25	20.4997	2.2825	0.1745	9.97333
07_21	AS	25	20.4997	2.2825	0.1745	9.97333
07_21	AS	26	22.987	2.181	0.143	10.54
07_21	AS	26	24.776	2.032	0.147	12.19
07_21	AS	26	24.771	3.033	0.162	8.17
07_21	AS	26	23.138	3.098	0.333	7.47
07_21	AS	26	21.158	3.055	0.174	6.93
07_21	AS	26	22.835	3.144	0.158	7.26
07_21	AS	26	21.764	2.627	0.233	8.29
07_21	AS	26	21.258	2.687	0.151	7.91
07_21	AS	26	22.8359	2.73212	0.187625	8.595
07_21	AS	27	24.26	2.594	0.129	9.35
07_21	AS	27	19.544	3.021	0.159	6.47
07_21	AS	27	23.603	1.468	0.117	16.07
07_21	AS	27	23.551	3.259	0.148	7.23
07_21	AS	27	22.873	2.949	0.169	7.76
07_21	AS	27	22.544	2.072	0.14	10.88
07_21	AS	27	20.613	2.587	0.155	7.97
07_21	AS	27	19.222	2.025	0.187	9.49
07_21	AS	27	19.531	3.049	0.162	6.41
07_21	AS	28	21.247	2.357	0.199	9.01
07_21	AS	28	20.758	1.736	0.166	11.96
07_21	AS	28	23.96	2.475	0.166	9.68
07_21	AS	28	23.651	2.529	0.117	9.35
07_21	AS	28	17.698	2.304	0.221	7.68
07_21	AS	28	20.657	2.414	0.172	8.56
07_21	AS	28	22.98	2.642	0.149	8.7
07_21	AS	28	21.42	2.566	0.188	8.35
07_21	AS	28	20.44	2.395	0.163	8.54
07_21	AS	29	22.588	1.643	0.121	13.75
07_21	AS	29	23.33	1.898	0.119	12.29
07_21	AS	29	23.412	2.425	0.116	9.65
07_21	AS	29	22.894	2.64	0.148	8.67
07_21	AS	29	17.285	2.845	0.186	6.08
07_21	AS	29	21.9018	2.2902	0.138	10.088
07_21	AS	29	21.9018	2.2902	0.138	10.088
07_21	AS	29	22.665	2.102	0.122	10.78
07_21	AS	29	21.9972	2.26668	0.136	10.1745
07_21	AS	30	24.098	2.784	0.189	8.66
07_21	AS	30	21.092	2.88	0.211	7.32
07_21	AS	30	20.911	2.913	0.198	7.18
07_21	AS	30	22.876	2.875	0.154	7.96
07_21	AS	30	25.107	2.882	0.126	8.71
07_21	AS	30	22.044	2.591	0.156	8.51
07_21	AS	30	19.757	2.944	0.173	6.71
07_21	AS	30	22.2693	2.83843	0.172429	7.86429
07_21	AS	30	22.008	2.8462	0.170061	7.75061
07_21	AS	31	18.652	3.387	0.218	5.51
07_21	AS	31	18.848	3.344	0.256	5.64
07_21	AS	31	20.305	3.093	0.154	6.56
07_21	AS	31	22.013	2.556	0.155	8.61
07_21	AS	31	24.745	2.091	0.144	11.83
07_21	AS	31	27.361	2.238	0.116	12.23
07_21	AS	31	24.389	2.373	0.146	10.28
07_21	AS	31	21.607	2.699	0.154	8.01
07_21	AS	31	21.397	2.845	0.146	7.52
07_21	AS	32	22.712	3.604	0.151	6.3
07_21	AS	32	19.194	2.839	0.193	6.76
07_21	AS	32	16.089	2.112	0.221	7.62
07_21	AS	32	19.809	2.382	0.166	8.32
07_21	AS	32	23.783	2.663	0.137	8.93
07_21	AS	32	23.222	2.648	0.09	8.77
07_21	AS	32	22.583	3.007	0.148	7.51
07_21	AS	32	26.988	2.77	0.123	9.74
07_21	AS	32	25.594	2.818	0.108	9.08
08_21	SS	1	34.338	1.877	0.02	18.29
08_21	SS	1	38.194	2.033	0.025	18.79
08_21	SS	1	35.584	1.94	0.027	18.34
08_21	SS	1	34.084	2.13	0.048	16
08_21	SS	1	34.872	2.264	0.042	15.4
08_21	SS	1	36.379	1.896	0.052	19.18
08_21	SS	1	38.664	2.026	0.042	19.08
08_21	SS	1	37.625	2.215	0.046	16.98
08_21	SS	1	37.096	2.212	0.041	16.77
08_21	SS	2	24.024	2.005	0.087	11.98
08_21	SS	2	29.741	1.183	0.085	25.13
08_21	SS	2	27.265	1.411	0.058	19.32
08_21	SS	2	25.462	2.048	0.056	12.43
08_21	SS	2	22.832	2.454	0.122	9.3
08_21	SS	2	21.357	2.406	0.127	8.88
08_21	SS	2	25.347	2.404	0.086	10.54
08_21	SS	2	22.83	2.094	0.108	10.9
08_21	SS	2	19.865	1.983	0.122	10.02
08_21	SS	3	31.817	0.85	0.042	37.45
08_21	SS	3	37.605	1.134	0	33.17
08_21	SS	3	32.891	1.825	0.009	18.03
08_21	SS	3	29.242	1.546	0.016	18.91
08_21	SS	3	34.103	1.336	0	25.53
08_21	SS	3	37.668	1.671	0	22.55
08_21	SS	3	32.06	1.313	0.017	24.41
08_21	SS	3	32.443	1.824	0.019	17.78
08_21	SS	3	33.467	1.855	0.011	18.04
08_21	SS	4	26.049	1.393	0.067	18.7
08_21	SS	4	31.249	1.04	0.046	30.05
08_21	SS	4	33.231	0.99	0.039	33.57
08_21	SS	4	30.183	1.04	0	29.02
08_21	SS	4	27.339	1.1	0.003	24.86
08_21	SS	4	29.686	1	0.034	29.69
08_21	SS	4	32.555	1.008	0.057	32.31
08_21	SS	4	33.519	1.504	0.031	22.28
08_21	SS	4	30.033	1.365	0.034	22
08_21	SS	5	33.845	1.682	0	20.12
08_21	SS	5	32.503	1.114	0.004	29.17
08_21	SS	5	32.93	1.611	0	20.44
08_21	SS	5	35.039	1.904	0.009	18.4
08_21	SS	5	33.162	1.674	0.004	19.81
08_21	SS	5	33.566	1.986	0.054	16.9
08_21	SS	5	31.748	2.248	0.058	14.12
08_21	SS	5	31.541	2.197	0.06	14.36
08_21	SS	5	29.794	2.117	0.037	14.07
08_21	SS	6	28.195	1.463	0.039	19.27
08_21	SS	6	27.748	1.351	0.029	20.54
08_21	SS	6	27.265	1.279	0.016	21.33
08_21	SS	6	28.682	1.567	0.009	18.3
08_21	SS	6	30.763	1.962	0.001	15.68
08_21	SS	6	29.797	2.003	0.023	14.87
08_21	SS	6	30.287	2.407	0.024	12.58
08_21	SS	6	32.733	2.651	0.04	12.35
08_21	SS	6	29.062	2.779	0.064	10.46
08_21	SS	7	30.597	1.536	0.012	19.93
08_21	SS	7	29.968	0.874	0	34.29
08_21	SS	7	30.828	0.903	0	34.15
08_21	SS	7	30.897	1.297	0.006	23.81
08_21	SS	7	28.359	1.272	0.015	22.3
08_21	SS	7	29.364	1.137	0	25.82
08_21	SS	7	30.901	1.144	0.046	27.02
08_21	SS	7	31.589	1.049	0.09	30.12
08_21	SS	7	29.048	1.283	0.048	22.64
08_21	SS	8	27.597	1.989	0.041	13.88
08_21	SS	8	31.445	1.45	0.015	21.69
08_21	SS	8	33.028	1.508	0.018	21.9
08_21	SS	8	31.158	2.08	0.037	14.98
08_21	SS	8	27.667	2.741	0.086	10.09
08_21	SS	8	28.94	2.412	0.043	12
08_21	SS	8	31.978	1.936	0.049	16.51
08_21	SS	8	31.145	1.825	0.022	17.07
08_21	SS	8	30.561	2.026	0.038	15.08
08_21	C	9	27.043	0.996	0.016	27.16
08_21	C	9	30.943	1.553	0.012	19.93
08_21	C	9	36.185	1.57	0	23.06
08_21	C	9	35.32	1.632	0.018	21.64
08_21	C	9	34.483	2.235	0.06	15.43
08_21	C	9	36.822	2.343	0.045	15.71
08_21	C	9	37.261	2.459	0.046	15.15
08_21	C	9	37.167	2.545	0.074	14.6
08_21	C	9	35.996	2.601	0.102	13.84
08_21	C	10	31.968	2.058	0.039	15.53
08_21	C	10	34.884	2.228	0.01	15.66
08_21	C	10	38.107	2.365	0.014	16.11
08_21	C	10	35.19	2.351	0.024	14.97
08_21	C	10	36.524	2.484	0.007	14.7
08_21	C	10	38.085	2.452	0.039	15.53
08_21	C	10	35.626	2.371	0.068	15.03
08_21	C	10	36.076	2.553	0.051	14.13
08_21	C	10	36.793	2.403	0.035	15.31
08_21	C	11	35.999	1.727	0.031	20.85
08_21	C	11	36.479	1.291	0	28.26
08_21	C	11	36.918	1.558	0.039	23.69
08_21	C	11	38.259	1.901	0.048	20.13
08_21	C	11	38.053	2.261	0.026	16.83
08_21	C	11	36.712	2.498	0.03	14.69
08_21	C	11	37.07	1.87267	0.029	20.7417
08_21	C	11	37.0354	1.93896	0.02975	20.0627
08_21	C	11	37.0657	1.88095	0.0290938	20.6568
08_21	C	12	36.053	1.842	0.026	19.57
08_21	C	12	36.71	1.152	0	31.87
08_21	C	12	34.582	0.81	0	42.67
08_21	C	12	33.981	1.656	0	20.52
08_21	C	12	36.453	1.994	0.009	18.28
08_21	C	12	35.953	2.549	0.002	14.1
08_21	C	12	36.467	2.822	0	12.92
08_21	C	12	36.654	2.369	0.009	15.47
08_21	C	12	35.8566	1.89925	0.00575	21.925
08_21	C	13	31.989	1.518	0.024	21.08
08_21	C	13	31.929	1.256	0.015	25.41
08_21	C	13	35.347	1.826	0.012	19.36
08_21	C	13	34.932	2.533	0.057	13.79
08_21	C	13	35.325	2.556	0.103	13.82
08_21	C	13	33.978	2.705	0.106	12.56
08_21	C	13	33.235	3.202	0.045	10.38
08_21	C	13	34.517	3.214	0.042	10.74
08_21	C	13	36.142	3.136	0.03	11.52
08_21	C	14	33.546	1.732	0.084	19.36
08_21	C	14	33.685	1.334	0.074	25.26
08_21	C	14	36.059	1.381	0.055	26.12
08_21	C	14	31.676	1.009	0.114	31.39
08_21	C	14	33.825	1.196	0.104	28.29
08_21	C	14	39.501	1.821	0.052	21.69
08_21	C	14	40.196	1.494	0.075	26.9
08_21	C	14	39.713	1.52	0.09	26.13
08_21	C	14	36.602	1.854	0.086	19.74
08_21	C	15	35.31	2.243	0.028	15.74
08_21	C	15	34.283	1.515	0	22.63
08_21	C	15	35.854	1.965	0.053	18.25
08_21	C	15	36.812	2.179	0.041	16.9
08_21	C	15	37.452	1.973	0	18.98
08_21	C	15	37.466	1.687	0	22.2
08_21	C	15	35.343	2.377	0	14.87
08_21	C	15	33.414	2.84	0.027	11.76
08_21	C	15	35.418	2.861	0.046	12.38
08_21	C	16	36.906	1.659	0.076	22.24
08_21	C	16	35.58	1.323	0.035	26.9
08_21	C	16	35.229	1.221	0.097	28.86
08_21	C	16	33.407	1.384	0.096	24.14
08_21	C	16	32.491	1.542	0.041	21.06
08_21	C	16	31.101	1.986	0.056	15.66
08_21	C	16	32.662	2.368	0.064	13.79
08_21	C	16	34.51	2.425	0.052	14.23
08_21	C	16	31.017	2.782	0.063	11.15
08_21	CS	17	34.241	1.408	0.009	24.31
08_21	CS	17	31.1	0.784	0	39.68
08_21	CS	17	33.263	1.098	0	30.29
08_21	CS	17	33.883	1.397	0	24.25
08_21	CS	17	31.74	2.035	0.012	15.59
08_21	CS	17	31.638	2.405	0.018	13.15
08_21	CS	17	31.565	2.382	0.003	13.25
08_21	CS	17	31.289	2.444	0.071	12.8
08_21	CS	17	30.466	2.453	0.044	12.42
08_21	CS	18	33.395	1.207	0	27.66
08_21	CS	18	31.446	1.19	0.001	26.43
08_21	CS	18	33.508	1.739	0.007	19.27
08_21	CS	18	36.009	2.244	0	16.05
08_21	CS	18	34.622	2.269	0.002	15.26
08_21	CS	18	33.719	2.296	0	14.69
08_21	CS	18	33.183	2.549	0.036	13.02
08_21	CS	18	33.527	2.761	0.044	12.14
08_21	CS	18	34.97	2.679	0.031	13.05
08_21	CS	19	32.132	1.969	0.021	16.32
08_21	CS	19	33.29	1.402	0	23.75
08_21	CS	19	32.479	1.421	0	22.86
08_21	CS	19	31.281	1.294	0	24.18
08_21	CS	19	28.412	0.944	0	30.1
08_21	CS	19	25.734	0.852	0	30.21
08_21	CS	19	30.562	1.73	0	17.67
08_21	CS	19	36.336	2.442	0.001	14.88
08_21	CS	19	33.708	2.528	0	13.33
08_21	CS	20	34.23	1.884	0.015	18.17
08_21	CS	20	34.64	1.056	0	32.8
08_21	CS	20	30.571	0.765	0.04	39.94
08_21	CS	20	27.373	1.172	0.062	23.37
08_21	CS	20	31.787	1.996	0.007	15.93
08_21	CS	20	31.887	1.782	0	17.89
08_21	CS	20	32.616	2.043	0.021	15.97
08_21	CS	20	35.172	2.58	0.03	13.63
08_21	CS	20	30.735	2.722	0.063	11.29
08_21	CS	21	37.475	1.551	0.021	24.16
08_21	CS	21	32.852	1.12	0.042	29.34
08_21	CS	21	31.324	1.142	0.059	27.44
08_21	CS	21	32.263	1.475	0.045	21.87
08_21	CS	21	31.487	1.854	0.059	16.98
08_21	CS	21	33.702	2.267	0.076	14.86
08_21	CS	21	33.509	2.37	0.097	14.14
08_21	CS	21	36.066	2.386	0.121	15.12
08_21	CS	21	35.213	2.495	0.111	14.12
08_21	CS	22	25.738	0.948	0.079	27.15
08_21	CS	22	31.575	0.925	0.094	34.14
08_21	CS	22	37.838	0.981	0.075	38.56
08_21	CS	22	35.297	1.8	0.082	19.61
08_21	CS	22	32.796	2.387	0.116	13.74
08_21	CS	22	34.813	2.469	0.101	14.1
08_21	CS	22	33.729	2.833	0.094	11.9
08_21	CS	22	31.346	2.878	0.12	10.89
08_21	CS	22	31.771	2.722	0.114	11.67
08_21	CS	23	34.336	2.188	0.091	15.69
08_21	CS	23	36.028	1.977	0.061	18.22
08_21	CS	23	38.909	2.156	0.059	18.05
08_21	CS	23	36.956	1.901	0.061	19.44
08_21	CS	23	33.888	1.73	0.07	19.59
08_21	CS	23	34.456	2.064	0.046	16.7
08_21	CS	23	35.752	2.599	0.058	13.76
08_21	CS	23	33.803	2.54	0.099	13.31
08_21	CS	23	34.701	2.47	0.09	14.05
08_21	CS	24	36.331	2.425	0.118	14.98
08_21	CS	24	39.046	1.627	0.109	24
08_21	CS	24	35.393	1.741	0.069	20.33
08_21	CS	24	34.996	2.579	0.047	13.57
08_21	CS	24	33.889	2.065	0.057	16.41
08_21	CS	24	32.772	1.929	0.099	16.99
08_21	CS	24	33.042	1.708	0.146	19.34
08_21	CS	24	32.117	1.582	0.15	20.3
08_21	AS	25	26.678	2.459	0.035	10.85
08_21	AS	25	25.215	1.68	0.001	15.01
08_21	AS	25	26.978	1.698	0.007	15.89
08_21	AS	25	29.83	2.219	0.014	13.44
08_21	AS	25	25.96	2.39	0.034	10.86
08_21	AS	25	26.353	2.134	0.057	12.35
08_21	AS	25	28.223	2.514	0.05	11.23
08_21	AS	25	27.518	2.683	0.064	10.26
08_21	AS	25	28.043	2.527	0.107	11.1
08_21	AS	26	22.652	2.654	0.075	8.53
08_21	AS	26	24.716	2.731	0.103	9.05
08_21	AS	26	27.61	1.988	0.068	13.89
08_21	AS	26	30.511	2.521	0.052	12.1
08_21	AS	26	25.312	3.333	0.111	7.6
08_21	AS	26	21.286	2.899	0.128	7.34
08_21	AS	26	22.433	2.388	0.16	9.39
08_21	AS	26	24.006	2.685	0.158	8.94
08_21	AS	26	26.6	3.196	0.068	8.32
08_21	AS	27	28.023	2.761	0.054	10.15
08_21	AS	27	29.16	2.725	0.014	10.7
08_21	AS	27	29.41	2.198	0.007	13.38
08_21	AS	27	28.723	2.476	0.022	11.6
08_21	AS	27	27.183	2.611	0.035	10.41
08_21	AS	27	23.041	1.988	0.035	11.59
08_21	AS	27	19.798	2.675	0.063	7.4
08_21	AS	27	17.528	3.159	0.104	5.55
08_21	AS	27	18.017	2.856	0.095	6.31
08_21	AS	28	26.691	2.433	0.068	10.97
08_21	AS	28	28.141	1.68	0.059	16.75
08_21	AS	28	32.034	1.648	0.044	19.44
08_21	AS	28	30.551	2.357	0.055	12.96
08_21	AS	28	27.262	3.018	0.062	9.03
08_21	AS	28	22.913	3.168	0.1	7.23
08_21	AS	28	23.592	2.702	0.066	8.73
08_21	AS	28	23.514	2.619	0.072	8.98
08_21	AS	28	21.177	3.103	0.127	6.83
08_21	AS	29	26.104	1.432	0.086	18.23
08_21	AS	29	24.927	1.812	0.106	13.75
08_21	AS	29	24.22	2.004	0.122	12.09
08_21	AS	29	23.566	2.167	0.172	10.88
08_21	AS	29	21.374	2.569	0.236	8.32
08_21	AS	29	24.764	2.762	0.172	8.97
08_21	AS	29	27.314	2.75	0.106	9.93
08_21	AS	29	26.05	2.218	0.134	11.75
08_21	AS	29	25.931	2.047	0.161	12.67
08_21	AS	30	24.073	2.102	0.097	11.45
08_21	AS	30	18.373	2.24	0.277	8.2
08_21	AS	30	21.95	2.112	0.139	10.39
08_21	AS	30	22.971	1.915	0.128	11.99
08_21	AS	30	31.255	1.71	0.115	18.27
08_21	AS	30	29.371	2.517	0.142	11.67
08_21	AS	30	27.525	3.313	0.109	8.31
08_21	AS	30	23.938	2.65	0.15	9.03
08_21	AS	30	24.119	3.052	0.119	7.9
08_21	AS	31	20.189	2.521	0.263	8.01
08_21	AS	31	13.6	3.299	0.438	4.12
08_21	AS	31	18.49	2.981	0.286	6.2
08_21	AS	31	29.899	2.4	0.066	12.46
08_21	AS	31	37.22	2.709	0.064	13.74
08_21	AS	31	29.694	1.75	0.176	16.96
08_21	AS	31	25.262	2.555	0.163	9.89
08_21	AS	31	30.074	2.811	0.111	10.7
08_21	AS	31	34.471	2.578	0.094	13.37
08_21	AS	32	20.215	2.955	0.181	6.84
08_21	AS	32	23.525	2.924	0.168	8.05
08_21	AS	32	20.965	2.811	0.179	7.46
08_21	AS	32	21.918	2.893	0.154	7.58
08_21	AS	32	25.981	2.75	0.118	9.45
08_21	AS	32	27.213	2.594	0.105	10.49
08_21	AS	32	29.918	2.681	0.118	11.16
08_21	AS	32	30.612	2.888	0.107	10.6
08_21	AS	32	26.673	1.391	0.086	19.17
09_21	SS	1	32.555	1.69	0.275	19.26
09_21	SS	1	32.507	1.636	0.28	19.87
09_21	SS	1	34.443	2.219	0.269	15.52
09_21	SS	1	36.437	2.43	0.242	14.99
09_21	SS	1	35.525	2.437	0.304	14.58
09_21	SS	1	29.532	2.435	0.32	12.13
09_21	SS	1	31.352	2.366	0.298	13.25
09_21	SS	1	35.242	2.418	0.279	14.57
09_21	SS	1	33.4491	2.20388	0.283375	15.5212
09_21	SS	2	21.993	2.944	0.332	7.47
09_21	SS	2	23.275	2.974	0.29	7.83
09_21	SS	2	25.96	2.828	0.312	9.18
09_21	SS	2	24.07	2.939	0.306	8.19
09_21	SS	2	22.074	2.738	0.347	8.06
09_21	SS	2	23.045	2.692	0.313	8.56
09_21	SS	2	17.978	3.032	0.344	5.93
09_21	SS	2	16.287	2.987	0.36	5.45
09_21	SS	2	15.271	3.203	0.362	4.77
09_21	SS	3	35.182	1.621	0.247	21.7
09_21	SS	3	32.285	0.889	0.251	36.32
09_21	SS	3	27.093	0.754	0.262	35.93
09_21	SS	3	26.526	0.676	0.259	39.26
09_21	SS	3	31.426	1.147	0.255	27.41
09_21	SS	3	34.937	1.523	0.237	22.94
09_21	SS	3	32.204	1.619	0.239	19.89
09_21	SS	3	29.832	2.472	0.271	12.07
09_21	SS	3	31.949	2.428	0.226	13.16
09_21	SS	4	19.801	2.209	0.216	8.96
09_21	SS	4	26.987	1.182	0.27	22.84
09_21	SS	4	28.665	1.087	0.23	26.37
09_21	SS	4	32.223	1.595	0.24	20.2
09_21	SS	4	29.661	1.407	0.262	21.08
09_21	SS	4	29.288	1.705	0.238	17.18
09_21	SS	4	28.028	1.879	0.225	14.92
09_21	SS	4	22.808	1.223	0.304	18.65
09_21	SS	4	28.242	1.564	0.255	18.06
09_21	SS	5	30.083	2.054	0.278	14.64
09_21	SS	5	33.537	1.736	0.217	19.32
09_21	SS	5	34.491	1.645	0.231	20.96
09_21	SS	5	32.983	1.71	0.267	19.28
09_21	SS	5	33.206	2.297	0.272	14.46
09_21	SS	5	30.213	2.441	0.262	12.38
09_21	SS	5	27.443	2.068	0.313	13.27
09_21	SS	5	27.791	1.998	0.352	13.91
09_21	SS	5	28.799	2.01	0.246	14.33
09_21	SS	6	28.953	2.276	0.325	12.72
09_21	SS	6	28.092	1.406	0.296	19.99
09_21	SS	6	29.347	1.33	0.237	22.07
09_21	SS	6	27.874	1.809	0.282	15.41
09_21	SS	6	30.541	2.365	0.235	12.91
09_21	SS	6	32.116	2.609	0.264	12.31
09_21	SS	6	28.282	2.117	0.306	13.36
09_21	SS	6	29.582	2.168	0.323	13.64
09_21	SS	6	29.3484	2.01	0.2835	15.3012
09_21	SS	7	30.205	1.668	0.272	18.11
09_21	SS	7	26.563	1.037	0.293	25.61
09_21	SS	7	29.203	1.557	0.284	18.76
09_21	SS	7	28.59	2.337	0.286	12.24
09_21	SS	7	30.035	2.83	0.296	10.61
09_21	SS	7	29.298	2.631	0.278	11.14
09_21	SS	7	26.163	2.58	0.286	10.14
09_21	SS	7	28.5796	2.09143	0.285	15.23
09_21	SS	7	28.5796	2.09143	0.285	15.23
09_21	SS	8	37.475	3.014	0.263	12.44
09_21	SS	8	31.171	1.162	0.254	26.83
09_21	SS	8	27.368	1.008	0.276	27.15
09_21	SS	8	25.698	0.912	0.278	28.18
09_21	SS	8	29.451	1.676	0.27	17.58
09_21	SS	8	32.153	2.431	0.222	13.23
09_21	SS	8	31.009	2.591	0.278	11.97
09_21	SS	8	29.166	2.743	0.319	10.63
09_21	SS	8	29.805	2.914	0.311	10.23
09_21	C	9	26.524	1.38	0.283	19.22
09_21	C	9	28.109	1.278	0.265	22
09_21	C	9	35.346	1.902	0.26	18.59
09_21	C	9	36.688	2.454	0.261	14.95
09_21	C	9	37.925	2.548	0.302	14.89
09_21	C	9	39.803	2.981	0.176	13.35
09_21	C	9	38.308	2.785	0.29	13.76
09_21	C	9	36.163	2.938	0.319	12.31
09_21	C	9	34.8582	2.28325	0.2695	16.1337
09_21	C	10	27.511	1.565	0.258	17.58
09_21	C	10	19.866	0.739	0.354	26.89
09_21	C	10	19.091	0.798	0.331	23.93
09_21	C	10	21.394	0.83	0.334	25.78
09_21	C	10	20.954	1.268	0.337	16.53
09_21	C	10	29.173	1.955	0.266	14.92
09_21	C	10	30.647	2.367	0.244	12.95
09_21	C	10	32.732	2.531	0.272	12.93
09_21	C	10	25.171	1.50663	0.2995	18.9388
09_21	C	11	34.336	2.441	0.266	14.07
09_21	C	11	35.023	2.561	0.264	13.67
09_21	C	11	33.799	2.712	0.233	12.46
09_21	C	11	35.621	2.152	0.237	16.55
09_21	C	11	36.726	1.888	0.287	19.45
09_21	C	11	35.724	1.895	0.217	18.86
09_21	C	11	36.559	2.532	0.301	14.44
09_21	C	11	35.628	3.096	0.296	11.51
09_21	C	11	36.51	3.126	0.281	11.68
09_21	C	12	32.857	1.992	0.239	16.49
09_21	C	12	30.041	1.191	0.244	25.22
09_21	C	12	29.179	1.07	0.216	27.27
09_21	C	12	28.346	0.993	0.238	28.54
09_21	C	12	26.245	0.956	0.259	27.46
09_21	C	12	29.596	1.672	0.276	17.7
09_21	C	12	34.761	2.169	0.266	16.03
09_21	C	12	33.536	2.05	0.244	16.36
09_21	C	12	31.448	1.812	0.239	17.36
09_21	C	13	33.38	0.99	0.218	33.71
09_21	C	13	32.041	2.12	0.245	15.11
09_21	C	13	36.965	2.69	0.234	13.74
09_21	C	13	33.268	3.118	0.25	10.67
09_21	C	13	35.926	3.048	0.292	11.79
09_21	C	13	40.143	2.643	0.221	15.19
09_21	C	13	36.736	2.546	0.275	14.43
09_21	C	13	35.4941	2.45071	0.247857	16.3771
09_21	C	13	35.4941	2.45071	0.247857	16.3771
09_21	C	14	40.1	2.199	0.183	18.24
09_21	C	14	38.556	1.042	0.169	37
09_21	C	14	36.978	1.338	0.216	27.63
09_21	C	14	35.113	1.589	0.218	22.1
09_21	C	14	36.459	1.842	0.213	19.8
09_21	C	14	37.528	2.21	0.239	16.98
09_21	C	14	37.31	1.982	0.236	18.83
09_21	C	14	38.712	1.854	0.27	20.88
09_21	C	14	37.019	1.897	0.257	19.51
09_21	C	15	35.909	1.379	0.291	26.04
09_21	C	15	40.812	1.883	0.241	21.68
09_21	C	15	41.519	2.248	0.229	18.47
09_21	C	15	39.23	1.934	0.225	20.29
09_21	C	15	37.763	1.915	0.225	19.72
09_21	C	15	39.785	2.061	0.21	19.31
09_21	C	15	40.448	2.471	0.218	16.37
09_21	C	15	38.659	2.442	0.234	15.83
09_21	C	15	39.2656	2.04162	0.234125	19.7138
09_21	C	16	36.803	2.057	0.222	17.89
09_21	C	16	35.574	1.728	0.208	20.58
09_21	C	16	36.537	1.694	0.219	21.56
09_21	C	16	36.246	2.728	0.25	13.29
09_21	C	16	36.254	2.008	0.218	18.06
09_21	C	16	34.917	2.633	0.262	13.26
09_21	C	16	36.0552	2.14133	0.229833	17.44
09_21	C	16	36.0552	2.14133	0.229833	17.44
09_21	C	16	36.0552	2.14133	0.229833	17.44
09_21	CS	17	26.669	1.126	0.256	23.69
09_21	CS	17	27.214	1.171	0.18	23.23
09_21	CS	17	26.903	1.307	0.253	20.58
09_21	CS	17	26.83	1.812	0.269	14.81
09_21	CS	17	27.711	2.385	0.257	11.62
09_21	CS	17	28.68	2.887	0.151	9.93
09_21	CS	17	28.014	2.825	0.265	9.92
09_21	CS	17	27.4316	1.93043	0.233	16.2543
09_21	CS	17	27.4316	1.93043	0.233	16.2543
09_21	CS	18	30.032	1.696	0.282	17.71
09_21	CS	18	26.217	1.13	0.265	23.19
09_21	CS	18	26.401	0.463	0.183	57.02
09_21	CS	18	33.219	1.695	0.224	19.59
09_21	CS	18	32.622	2.673	0.22	12.21
09_21	CS	18	30.429	2.721	0.293	11.18
09_21	CS	18	29.406	3.292	0.229	8.93
09_21	CS	18	26.754	2.641	0.234	10.13
09_21	CS	18	29.385	2.03887	0.24125	19.995
09_21	CS	19	30.583	1.706	0.259	17.93
09_21	CS	19	33.012	1.227	0.244	26.9
09_21	CS	19	31.19	1.039	0.244	30.01
09_21	CS	19	29.887	0.947	0.253	31.57
09_21	CS	19	31.845	1.539	0.21	20.69
09_21	CS	19	30.666	1.374	0.233	22.32
09_21	CS	19	32.345	1.583	0.215	20.44
09_21	CS	19	31.3611	1.345	0.236857	24.2657
09_21	CS	19	31.1416	1.4221	0.237345	23.7912
09_21	CS	20	27.779	2.005	0.244	13.85
09_21	CS	20	28.572	2.089	0.29	13.68
09_21	CS	20	28.29	1.924	0.269	14.7
09_21	CS	20	29.89	1.714	0.233	17.44
09_21	CS	20	31.181	1.624	0.226	19.2
09_21	CS	20	33.761	1.979	0.222	17.06
09_21	CS	20	33.524	2.641	0.245	12.69
09_21	CS	20	31.134	2.974	0.277	10.47
09_21	CS	20	29.331	2.694	0.327	10.89
09_21	CS	21	32.067	2.795	0.215	11.47
09_21	CS	21	32.923	2.131	0.237	15.45
09_21	CS	21	32.988	1.807	0.214	18.26
09_21	CS	21	32.852	1.54	0.231	21.34
09_21	CS	21	33.318	2.11	0.251	15.79
09_21	CS	21	34.818	2.425	0.23	14.36
09_21	CS	21	32.6139	2.21457	0.243571	15.3657
09_21	CS	21	33.0828	2.14608	0.231653	16.0051
09_21	CS	21	33.0828	2.14608	0.231653	16.0051
09_21	CS	22	33.555	2.449	0.243	13.7
09_21	CS	22	32.467	2.536	0.231	12.8
09_21	CS	22	32.586	2.857	0.264	11.4
09_21	CS	22	31.03	2.583	0.257	12.01
09_21	CS	22	28.968	1.922	0.259	15.07
09_21	CS	22	27.408	1.743	0.248	15.73
09_21	CS	22	31.876	2.078	0.221	15.34
09_21	CS	22	34.06	2.257	0.237	15.09
09_21	CS	22	32.361	2.71	0.32	11.94
09_21	CS	23	32.801	2.671	0.231	12.28
09_21	CS	23	31.327	2.639	0.258	11.87
09_21	CS	23	34.802	1.714	0.225	20.31
09_21	CS	23	34.876	2.021	0.241	17.25
09_21	CS	23	36.29	2.804	0.255	12.94
09_21	CS	23	37.335	2.92	0.234	12.79
09_21	CS	23	36.37	3.025	0.237	12.02
09_21	CS	23	36.084	2.74	0.219	13.17
09_21	CS	23	36.215	2.474	0.267	14.64
09_21	CS	24	33.784	2.461	0.388	13.73
09_21	CS	24	35.64	1.471	0.212	24.23
09_21	CS	24	34.733	2.589	0.281	13.41
09_21	CS	24	31.843	2.165	0.25	14.71
09_21	CS	24	29.988	2.271	0.256	13.2
09_21	CS	24	34.854	2.725	0.25	12.79
09_21	CS	24	34.533	2.687	0.246	12.85
09_21	CS	24	33.625	2.33843	0.269	14.9886
09_21	CS	24	33.625	2.33843	0.269	14.9886
09_21	AS	25	23.957	2.601	0.272	9.21
09_21	AS	25	25.831	1.739	0.286	14.85
09_21	AS	25	24.255	1.46	0.342	16.61
09_21	AS	25	21.575	1.875	0.344	11.51
09_21	AS	25	23.312	2.519	0.335	9.26
09_21	AS	25	22.803	2.66	0.327	8.57
09_21	AS	25	21.002	2.788	0.365	7.53
09_21	AS	25	23.546	2.186	0.389	10.77
09_21	AS	25	26.836	1.958	0.293	13.71
09_21	AS	26	19.118	3.425	0.369	5.58
09_21	AS	26	19.448	2.4	0.396	8.1
09_21	AS	26	23.177	1.956	0.334	11.85
09_21	AS	26	25.831	1.734	0.272	14.9
09_21	AS	26	22.614	2.838	0.298	7.97
09_21	AS	26	19.226	3.399	0.346	5.66
09_21	AS	26	19.738	3.283	0.426	6.01
09_21	AS	26	21.491	3.12	0.322	6.89
09_21	AS	26	20.341	3.056	0.351	6.66
09_21	AS	27	17.956	2.973	0.382	6.04
09_21	AS	27	20.971	2.076	0.307	10.1
09_21	AS	27	21.028	1.886	0.31	11.15
09_21	AS	27	21.773	2.067	0.301	10.53
09_21	AS	27	19.25	2.078	0.305	9.26
09_21	AS	27	16.554	2.294	0.345	7.22
09_21	AS	27	16.827	2.722	0.345	6.18
09_21	AS	27	21.907	3.425	0.303	6.4
09_21	AS	27	19.5333	2.44013	0.32475	8.36
09_21	AS	28	20.094	2.671	0.353	7.52
09_21	AS	28	21.637	1.666	0.31	12.99
09_21	AS	28	20.042	2.005	0.32	10
09_21	AS	28	21.181	2.572	0.264	8.23
09_21	AS	28	20.011	2.929	0.346	6.83
09_21	AS	28	18.195	2.738	0.382	6.64
09_21	AS	28	16.326	3.095	0.449	5.27
09_21	AS	28	15.728	3.208	0.441	4.9
09_21	AS	28	19.1517	2.6105	0.358125	7.7975
09_21	AS	29	30.532	2.868	0.267	10.65
09_21	AS	29	22.857	2.323	0.294	9.84
09_21	AS	29	23.889	2.545	0.312	9.39
09_21	AS	29	24.811	2.687	0.338	9.23
09_21	AS	29	23.219	2.427	0.347	9.57
09_21	AS	29	19.947	2.886	0.388	6.91
09_21	AS	29	20.413	2.729	0.401	7.48
09_21	AS	29	23.1025	2.63444	0.338141	8.85844
09_21	AS	29	23.5963	2.63743	0.335643	8.99105
09_21	AS	30	28.803	2.658	0.286	10.84
09_21	AS	30	25.118	2.046	0.308	12.27
09_21	AS	30	20.844	1.377	0.236	15.14
09_21	AS	30	19.324	2.584	0.329	7.48
09_21	AS	30	17.986	2.43	0.431	7.4
09_21	AS	30	15.744	2.748	0.31	5.73
09_21	AS	30	21.6308	2.35435	0.319378	9.69301
09_21	AS	30	21.35	2.31391	0.317054	9.79329
09_21	AS	30	21.5996	2.34985	0.319119	9.70415
09_21	AS	31	19.701	2.799	0.358	7.04
09_21	AS	31	20.594	2.557	0.321	8.06
09_21	AS	31	24.551	2.678	0.306	9.17
09_21	AS	31	26.925	2.516	0.275	10.7
09_21	AS	31	27.383	2.317	0.222	11.82
09_21	AS	31	28.594	2.439	0.252	11.72
09_21	AS	31	24.6247	2.551	0.289	9.75167
09_21	AS	31	24.2465	2.52586	0.292765	9.74573
09_21	AS	31	24.5774	2.54786	0.289471	9.75092
09_21	AS	32	23.074	2.712	0.348	8.51
09_21	AS	32	23.484	2.668	0.315	8.8
09_21	AS	32	16.744	3.299	0.333	5.08
09_21	AS	32	16.117	3.353	0.358	4.81
09_21	AS	32	15.58	3.353	0.387	4.65
09_21	AS	32	21.214	3.238	0.333	6.55
09_21	AS	32	19.3688	3.10383	0.345667	6.4
09_21	AS	32	20.0199	3.03434	0.338642	6.81887
09_21	AS	32	19.4502	3.09515	0.344789	6.45236
