# Supplementary material for: The suitability of structural soil for the development of trees growing in urban areas
Source: PeerJ. 2026 Feb 20;14:e20407. doi: 10.7717/peerj.20407 (PMC12927605; doi:10.7717/peerj.20407)
Supplement: Supplemental Information 2 [file peerj-14-20407-s002.xlsx]

## Sheet: Arkusz1
year	term	soil	ID tree	t for Fm	Area	Fo	Fm	Fv	F1	F2	F3	F4	F5	Fo/Fm	Fv/Fm	PI Inst,	Fv/Fo	Vj	Vi	delta Vi	dVG/dto	dV/dto	Sm	N	Sm/t(Fm)	ABS/RC	DIo/RC	TRo/RC	ETo/RC	REo/RC	phi(Po)	psi(Eo)	phi(Eo)	delta(Ro)	phi(Ro)	delta Ro*psiEo	delta Vi	RC/Cso	ABS/CSo	DIo/CSo	TRo/CSo	ETo/CSo	REo/CSo	ABS/CSm	DIo/CSm	TRo/CSm	ETo/CSm	REo/CSm	gamma(RC)/((1-gamma(RC))
2022	06.22	SS	1	800	52492	412	1731	1319	450	484	626	936	1336	0.238	0.762	2.2656	3.201	0.3973	0.7005	0.2995	0.2578	0.5408	39.7967	54.1762	0.0497	1.7865	0.4252	1.3613	0.8205	0.408	0.762	0.6027	0.4593	0.4969	0.2282	0.299482	0.2995	230.619	412	98.0612	313.939	189.22	94.015	1731	412	1319	795	395	0.5597
2022	06.22	SS	1	900	58656	404	1716	1312	459	511	707	1011	1358	0.2354	0.765	1.4443	3.248	0.4627	0.7271	0.2729	0.3963	0.7698	44.7072	74.3893	0.0497	2.1763	0.5124	1.6639	0.8941	0.454	0.7646	0.5373	0.4108	0.5078	0.2086	0.272841	0.2729	185.636	404	95.1142	308.886	165.979	84.2844	1716	404	1312	705	358	0.4595
2022	06.22	SS	1	700	52254	407	1824	1417	457	500	701	1071	1465	0.2231	0.777	1.7318	3.482	0.4686	0.7466	0.2534	0.3035	0.6916	36.8767	54.4265	0.0527	1.8998	0.4239	1.4759	0.7843	0.374	0.7769	0.5314	0.4128	0.4768	0.1968	0.253372	0.2534	214.233	407	90.8163	316.184	168.021	80.1058	1824	407	1417	753	359	0.5264
2022	06.22	SS	1	700	64941	390	1906	1516	428	465	627	1025	1497	0.2046	0.795	2.8733	3.887	0.4189	0.7302	0.2698	0.2441	0.5211	42.8373	53.2937	0.0612	1.5641	0.3201	1.2441	0.723	0.336	0.7954	0.5811	0.4622	0.4642	0.2146	0.269747	0.2698	249.345	390	79.8006	310.199	180.268	83.6884	1906	390	1516	881	409	0.6393
2022	06.22	SS	1	800	68367	371	1883	1512	403	433	572	989	1455	0.197	0.803	3.6388	4.075	0.4087	0.7169	0.2831	0.1984	0.4431	45.2162	49.0207	0.0565	1.3502	0.266	1.0841	0.641	0.307	0.803	0.5913	0.4748	0.4787	0.2273	0.283055	0.2831	274.774	371	73.0967	297.903	176.141	84.3271	1883	371	1512	894	428	0.7407
2022	06.22	SS	1	700	56501	377	2014	1637	428	470	672	1091	1623	0.1872	0.813	2.7607	4.342	0.4362	0.7611	0.2389	0.2566	0.6007	34.5151	47.5348	0.0493	1.6944	0.3172	1.3772	0.7765	0.329	0.8128	0.5638	0.4583	0.4236	0.1941	0.238826	0.2389	222.498	377	70.5705	306.43	172.776	73.1912	2014	377	1637	923	391	0.5902
2022	06.22	SS	1	800	55676	381	1852	1471	428	471	665	1060	1493	0.2057	0.794	2.138	3.861	0.4616	0.7559	0.2441	0.2923	0.6436	37.8492	52.7697	0.0473	1.7553	0.3611	1.3942	0.7507	0.34	0.7943	0.5384	0.4276	0.4533	0.1938	0.244057	0.2441	217.057	381	78.3807	302.619	162.933	73.8548	1852	381	1471	792	359	0.5697
2022	06.22	SS	1	800	70438	366	2123	1757	404	439	611	1078	1669	0.1724	0.828	4.2365	4.801	0.4052	0.7416	0.2584	0.1992	0.4648	40.0897	45.983	0.0501	1.3859	0.2389	1.147	0.6822	0.296	0.8276	0.5948	0.4922	0.4344	0.2138	0.258381	0.2584	264.088	366	63.0975	302.902	180.155	78.2685	2123	366	1757	1045	454	0.7215
2022	06.22	SS	1	900	71416	437	1999	1562	469	500	640	1040	1553	0.2186	0.781	3.2986	3.574	0.386	0.7145	0.2855	0.1985	0.4332	45.7208	51.3063	0.0508	1.4361	0.3139	1.1222	0.689	0.32	0.7814	0.614	0.4797	0.4651	0.2231	0.285571	0.2855	304.296	437	95.5323	341.468	209.646	97.4997	1999	437	1562	959	446	0.6963
2022	06.22	SS	2	800	61361	375	1897	1522	414	449	621	1068	1534	0.1977	0.802	2.7434	4.059	0.4553	0.7615	0.2385	0.23	0.5388	40.3158	47.7041	0.0504	1.4748	0.2915	1.1833	0.6445	0.282	0.8023	0.5447	0.437	0.4379	0.1914	0.238524	0.2385	254.272	375	74.1302	300.87	163.877	71.758	1897	375	1522	829	363	0.6781
2022	06.22	SS	2	400	45900	520	1849	1329	561	598	779	1174	1529	0.2812	0.719	1.1969	2.556	0.4921	0.7592	0.2408	0.2784	0.6496	34.5371	45.5917	0.0863	1.8366	0.5165	1.3201	0.6705	0.318	0.7188	0.5079	0.3651	0.4741	0.1731	0.240795	0.2408	283.132	520	146.241	373.759	189.832	89.9946	1849	520	1329	675	320	0.5445
2022	06.22	SS	2	900	72210	471	1823	1352	502	531	668	1076	1443	0.2584	0.742	2.0181	2.87	0.4475	0.7189	0.2811	0.2145	0.4857	53.4095	57.9707	0.0593	1.4635	0.3781	1.0854	0.5997	0.305	0.7416	0.5525	0.4098	0.5087	0.2084	0.281057	0.2811	321.831	471	121.69	349.31	192.999	98.1788	1823	471	1352	747	380	0.6833
2022	06.22	SS	2	800	59116	390	1788	1398	435	475	659	1025	1408	0.2181	0.782	1.9874	3.585	0.4542	0.7282	0.2718	0.2861	0.6414	42.2864	59.7115	0.0529	1.806	0.3939	1.4121	0.7707	0.384	0.7819	0.5458	0.4267	0.498	0.2125	0.271808	0.2718	215.947	390	85.0671	304.933	166.426	82.8859	1788	390	1398	763	380	0.5537
2022	06.22	SS	2	600	50141	400	1938	1538	453	503	722	1103	1608	0.2064	0.794	1.9782	3.845	0.4571	0.7854	0.2146	0.3251	0.6979	32.6015	49.7756	0.0543	1.9239	0.3971	1.5268	0.8289	0.328	0.7936	0.5429	0.4309	0.3952	0.1703	0.214554	0.2146	207.911	400	82.5593	317.441	172.343	68.1115	1938	400	1538	835	330	0.5198
2022	06.22	SS	2	700	53795	437	1847	1410	473	504	662	1064	1466	0.2366	0.763	2.1429	3.227	0.4447	0.7298	0.2702	0.2199	0.5319	38.1525	45.637	0.0545	1.5669	0.3707	1.1962	0.6643	0.323	0.7634	0.5553	0.4239	0.4866	0.2063	0.270209	0.2702	278.895	437	103.394	333.606	185.258	90.1446	1847	437	1410	783	381	0.6382
2022	06.22	SS	2	600	34359	335	1411	1076	372	409	563	870	1114	0.2374	0.763	1.453	3.212	0.4972	0.724	0.276	0.3439	0.7063	31.9326	45.3622	0.0532	1.8628	0.4423	1.4206	0.7142	0.392	0.7626	0.5028	0.3834	0.549	0.2105	0.276037	0.276	179.837	335	79.5358	255.464	128.444	70.5138	1411	335	1076	541	297	0.5368
2022	06.22	SS	2	800	42326	473	1622	1149	508	542	691	1006	1316	0.2916	0.708	1.2156	2.429	0.4639	0.7337	0.2663	0.2959	0.6324	36.8375	50.2225	0.046	1.9246	0.5612	1.3634	0.7309	0.363	0.7084	0.5361	0.3798	0.4968	0.1887	0.266334	0.2663	245.765	473	137.934	335.066	179.635	89.2343	1622	473	1149	616	306	0.5196
2022	06.22	SS	2	700	53519	351	1766	1415	397	436	628	1012	1437	0.1988	0.801	2.1981	4.031	0.4671	0.7675	0.2325	0.2756	0.6525	37.8228	52.8337	0.054	1.7434	0.3465	1.3969	0.7443	0.325	0.8012	0.5329	0.427	0.4363	0.1863	0.232504	0.2325	201.331	351	69.7627	281.237	149.861	65.3901	1766	351	1415	754	329	0.5736
2022	06.22	SS	3	600	56103	369	2104	1735	429	478	714	1167	1752	0.1754	0.825	2.6326	4.702	0.4599	0.7971	0.2029	0.2824	0.6628	32.3359	46.5994	0.0539	1.7476	0.3065	1.4411	0.7783	0.292	0.8246	0.5401	0.4453	0.3757	0.1673	0.202916	0.2029	211.147	369	64.7153	304.285	164.331	61.7338	2104	369	1735	937	352	0.5722
2022	06.22	SS	3	600	53421	374	2168	1794	439	493	751	1220	1834	0.1725	0.827	2.4953	4.797	0.4716	0.8138	0.1862	0.301	0.7005	29.7774	44.232	0.0496	1.7951	0.3097	1.4854	0.7849	0.277	0.8275	0.5284	0.4373	0.3523	0.1541	0.186155	0.1862	208.345	374	64.5185	309.481	163.539	57.6181	2168	374	1794	948	334	0.5571
2022	06.22	SS	3	600	40262	371	1596	1225	422	464	644	967	1309	0.2325	0.768	1.4598	3.302	0.4865	0.7657	0.2343	0.3429	0.7429	32.8667	50.1824	0.0548	1.9893	0.4624	1.5268	0.784	0.358	0.7675	0.5135	0.3941	0.4563	0.1798	0.23431	0.2343	186.498	371	86.2412	284.759	146.215	66.7149	1596	371	1225	629	287	0.5027
2022	06.22	SS	3	600	57981	379	2019	1640	438	491	720	1136	1650	0.1877	0.812	2.2754	4.327	0.4616	0.775	0.225	0.3232	0.6931	35.3545	53.0863	0.0589	1.8485	0.347	1.5015	0.8085	0.338	0.8123	0.5384	0.4373	0.4179	0.1828	0.224997	0.225	205.031	379	71.1446	307.855	165.754	69.2675	2019	379	1640	883	369	0.541
2022	06.22	SS	3	600	52911	365	1992	1627	417	463	677	1099	1646	0.1832	0.817	2.6051	4.458	0.4511	0.7873	0.2127	0.2827	0.6392	32.5203	46.0778	0.0542	1.7348	0.3179	1.4169	0.7777	0.301	0.8168	0.5489	0.4483	0.3875	0.1737	0.212699	0.2127	210.399	365	66.88	298.12	163.627	63.3986	1992	365	1627	893	346	0.5764
2022	06.22	SS	3	600	46540	386	1982	1596	465	534	835	1209	1670	0.1948	0.805	1.433	4.135	0.5157	0.8045	0.1955	0.4323	0.9378	29.1602	53.0293	0.0486	2.2584	0.4398	1.8186	0.8808	0.356	0.8052	0.4843	0.39	0.4036	0.1574	0.195463	0.1955	170.917	386	75.1746	310.825	150.544	60.7629	1982	386	1596	773	312	0.4428
2022	06.22	SS	3	600	60702	381	2105	1724	422	458	636	1088	1692	0.181	0.819	3.695	4.525	0.4101	0.7604	0.2396	0.2088	0.493	35.2098	42.3314	0.0587	1.468	0.2657	1.2023	0.7092	0.288	0.819	0.5899	0.4831	0.4061	0.1962	0.239558	0.2396	259.537	381	68.9601	312.04	184.075	74.752	2105	381	1724	1017	413	0.6812
2022	06.22	SS	3	600	50235	373	2067	1694	433	487	737	1172	1740	0.1805	0.82	2.2879	4.542	0.4717	0.807	0.193	0.3188	0.7163	29.6545	45.0323	0.0494	1.8529	0.3344	1.5186	0.8023	0.293	0.8195	0.5283	0.433	0.3654	0.1582	0.193041	0.193	201.306	373	67.3096	305.69	161.507	59.0087	2067	373	1694	895	327	0.5397
2022	06.22	SS	3	900	58823	366	1775	1409	406	443	614	991	1397	0.2062	0.794	2.4152	3.85	0.4436	0.7317	0.2683	0.2626	0.5867	41.7483	55.2191	0.0464	1.6662	0.3436	1.3227	0.736	0.355	0.7938	0.5564	0.4417	0.4821	0.213	0.26824	0.2683	219.662	366	75.4682	290.532	161.659	77.9425	1775	366	1409	784	378	0.6002
2022	06.22	SS	4	600	51657	360	2066	1706	420	474	721	1187	1745	0.1742	0.826	2.382	4.739	0.4848	0.8118	0.1882	0.3165	0.7054	30.2797	44.0587	0.0505	1.7621	0.307	1.4551	0.7497	0.274	0.8258	0.5152	0.4255	0.3652	0.1554	0.188151	0.1882	204.302	360	62.7299	297.27	153.166	55.9342	2066	360	1706	879	321	0.5675
2022	06.22	SS	4	600	50807	382	2281	1899	451	514	798	1302	1943	0.1675	0.833	2.435	4.971	0.4845	0.822	0.178	0.3318	0.7302	26.7544	40.3255	0.0446	1.8104	0.3032	1.5072	0.777	0.268	0.8325	0.5155	0.4292	0.3453	0.1482	0.178002	0.178	211.003	382	63.9737	318.026	163.953	56.605	2281	382	1899	979	338	0.5524
2022	06.22	SS	4	700	58431	379	2152	1773	431	477	699	1190	1789	0.1761	0.824	2.8967	4.678	0.4574	0.7953	0.2047	0.2594	0.6016	32.956	43.3453	0.0471	1.5964	0.2812	1.3152	0.7136	0.269	0.8239	0.5426	0.447	0.3773	0.1687	0.204723	0.2047	237.409	379	66.7477	312.252	169.423	63.9298	2152	379	1773	962	363	0.6264
2022	06.22	SS	4	400	38532	319	1804	1485	369	412	625	1041	1515	0.1768	0.823	2.3887	4.655	0.4862	0.8054	0.1946	0.2896	0.6869	25.9476	36.6573	0.0649	1.7162	0.3035	1.4127	0.7259	0.275	0.8232	0.5138	0.4229	0.3788	0.1602	0.194627	0.1946	185.876	319	56.4085	262.591	134.921	51.1037	1804	319	1485	763	289	0.5827
2022	06.22	SS	4	600	53000	403	2147	1744	468	529	795	1241	1800	0.1877	0.812	2.0311	4.328	0.4805	0.801	0.199	0.3498	0.7492	30.3897	47.3857	0.0506	1.9196	0.3603	1.5593	0.81	0.31	0.8123	0.5195	0.422	0.383	0.1616	0.198968	0.199	209.94	403	75.6446	327.355	170.06	65.1332	2147	403	1744	906	347	0.5209
2022	06.22	SS	4	700	56779	383	1978	1595	443	491	722	1147	1625	0.1936	0.806	2.058	4.164	0.479	0.7787	0.2213	0.3009	0.7085	35.5979	52.6513	0.0509	1.8342	0.3552	1.4791	0.7706	0.327	0.8064	0.521	0.4201	0.4248	0.1785	0.221321	0.2213	208.81	383	74.1603	308.84	160.906	68.3514	1978	383	1595	831	353	0.5452
2022	06.22	SS	4	700	49811	381	1844	1463	439	492	734	1122	1511	0.2066	0.793	1.5578	3.84	0.5065	0.7724	0.2276	0.3623	0.8043	34.0473	54.0652	0.0486	2.0015	0.4135	1.5879	0.7837	0.361	0.7934	0.4935	0.3915	0.4612	0.1806	0.227602	0.2276	190.357	381	78.7207	302.279	149.177	68.8031	1844	381	1463	722	333	0.4996
2022	06.22	SS	4	700	47861	387	1838	1451	442	492	714	1106	1509	0.2106	0.789	1.6565	3.749	0.4955	0.7733	0.2267	0.3446	0.7512	32.9852	50.0053	0.0471	1.9203	0.4043	1.516	0.7648	0.344	0.7894	0.5045	0.3983	0.4495	0.179	0.226773	0.2267	201.531	387	81.4848	305.515	154.126	69.2726	1838	387	1451	732	329	0.5207
2022	06.22	SS	4	700	64371	415	2078	1663	459	498	682	1088	1674	0.1997	0.8	2.9727	4.007	0.4047	0.7571	0.2429	0.2345	0.5352	38.7079	51.1887	0.0553	1.6524	0.33	1.3224	0.7873	0.321	0.8003	0.5953	0.4764	0.4081	0.1944	0.242942	0.2429	251.15	415	82.8802	332.12	197.714	80.6833	2078	415	1663	990	404	0.6052
2022	06.22	SS	5	700	50921	449	1946	1497	488	524	679	1019	1549	0.2307	0.769	2.5843	3.334	0.3808	0.7348	0.2652	0.2405	0.5121	34.0155	45.7519	0.0486	1.7484	0.4034	1.345	0.8329	0.357	0.7693	0.6192	0.4764	0.4283	0.204	0.265203	0.2652	256.806	449	103.598	345.402	213.886	91.5997	1946	449	1497	927	397	0.5719
2022	06.22	SS	5	600	52920	433	1994	1561	483	531	737	1147	1647	0.2172	0.783	1.9658	3.605	0.4574	0.7777	0.2223	0.3075	0.6492	33.9014	48.114	0.0565	1.8129	0.3937	1.4192	0.7701	0.315	0.7828	0.5426	0.4248	0.4097	0.174	0.222303	0.2223	238.844	433	94.0266	338.973	183.927	75.3516	1994	433	1561	847	347	0.5516
2022	06.22	SS	5	800	61649	367	1989	1622	412	448	633	1064	1605	0.1845	0.815	3.1333	4.42	0.4297	0.7633	0.2367	0.2219	0.5467	38.0083	48.351	0.0475	1.56	0.2878	1.2721	0.7255	0.301	0.8155	0.5703	0.4651	0.4151	0.1931	0.236732	0.2367	235.256	367	67.7169	299.283	170.676	70.8537	1989	367	1622	925	384	0.641
2022	06.22	SS	5	900	84219	401	1997	1596	454	502	713	1083	1573	0.2008	0.799	2.3296	3.98	0.4273	0.7343	0.2657	0.3008	0.6516	52.769	80.4689	0.0586	1.9081	0.3831	1.5249	0.8733	0.405	0.7992	0.5727	0.4577	0.4639	0.2123	0.265676	0.2657	210.157	401	80.5213	320.479	183.532	85.1397	1997	401	1596	914	424	0.5241
2022	06.22	SS	5	700	49502	418	1853	1435	458	494	658	1007	1479	0.2256	0.774	2.3429	3.433	0.4105	0.7394	0.2606	0.2509	0.5575	34.4963	46.8541	0.0493	1.7539	0.3956	1.3582	0.8007	0.354	0.7744	0.5895	0.4566	0.4421	0.2018	0.260618	0.2606	238.326	418	94.2925	323.707	190.841	84.367	1853	418	1435	846	374	0.5702
2022	06.22	SS	5	700	53140	379	2057	1678	436	484	716	1149	1698	0.1842	0.816	2.4328	4.427	0.4589	0.7861	0.2139	0.2861	0.6694	31.6684	46.2002	0.0452	1.7884	0.3295	1.4589	0.7894	0.312	0.8158	0.5411	0.4414	0.3954	0.1745	0.213951	0.2139	211.921	379	69.8303	309.17	167.298	66.1454	2057	379	1678	908	359	0.5592
2022	06.22	SS	5	400	36405	338	1543	1205	384	429	609	921	1248	0.2191	0.781	1.5975	3.565	0.4838	0.7552	0.2448	0.3734	0.7497	30.2114	46.8112	0.0755	1.9841	0.4346	1.5495	0.7998	0.379	0.7809	0.5162	0.4031	0.4743	0.1912	0.244834	0.2448	170.354	338	74.0402	263.96	136.251	64.6209	1543	338	1205	622	295	0.504
2022	06.22	SS	5	700	47583	422	1812	1390	473	518	715	1073	1482	0.2329	0.767	1.5932	3.294	0.4683	0.7626	0.2374	0.3237	0.7026	34.2325	51.3575	0.0489	1.9557	0.4555	1.5003	0.7976	0.356	0.7671	0.5317	0.4078	0.4465	0.1821	0.237404	0.2374	215.78	422	98.2804	323.72	172.107	76.8543	1812	422	1390	739	330	0.5113
2022	06.22	SS	5	800	48356	378	1734	1356	423	463	639	984	1405	0.218	0.782	2.0153	3.587	0.4469	0.7574	0.2426	0.295	0.6416	35.6606	51.196	0.0446	1.8358	0.4002	1.4356	0.7941	0.348	0.782	0.5531	0.4325	0.4387	0.1897	0.242645	0.2426	205.905	378	82.4014	295.599	163.495	71.7197	1734	378	1356	750	329	0.5447
2022	06.22	SS	6	600	50725	367	1918	1551	417	461	668	1083	1601	0.1913	0.809	2.3701	4.226	0.4616	0.7956	0.2044	0.2837	0.6469	32.7046	45.829	0.0545	1.7329	0.3316	1.4013	0.7544	0.286	0.8087	0.5384	0.4353	0.3796	0.1653	0.204377	0.2044	211.784	367	70.2237	296.776	159.773	60.6564	1918	367	1551	835	317	0.5771
2022	06.22	SS	6	700	51770	368	1888	1520	421	467	683	1102	1573	0.1949	0.805	2.0744	4.13	0.4829	0.7928	0.2072	0.3026	0.6908	34.0592	48.7223	0.0487	1.7769	0.3463	1.4305	0.7397	0.296	0.8051	0.5171	0.4163	0.4008	0.1668	0.207254	0.2072	207.102	368	71.7288	296.271	153.203	61.3983	1888	368	1520	786	315	0.5628
2022	06.22	SS	6	700	59842	372	1976	1604	424	467	671	1095	1621	0.1883	0.812	2.5782	4.312	0.4507	0.7787	0.2213	0.2681	0.6214	37.308	51.4296	0.0533	1.6982	0.3197	1.3785	0.7572	0.305	0.8117	0.5493	0.4459	0.403	0.1797	0.221368	0.2213	219.055	372	70.0324	301.968	165.856	66.832	1976	372	1604	881	355	0.5889
2022	06.22	SS	6	700	53933	376	1843	1467	431	478	699	1104	1512	0.204	0.796	1.7764	3.902	0.4963	0.7744	0.2256	0.3204	0.7339	36.7639	54.3716	0.0525	1.858	0.3791	1.4789	0.745	0.334	0.796	0.5037	0.401	0.4479	0.1796	0.225607	0.2256	202.368	376	76.7097	299.29	150.767	67.529	1843	376	1467	739	331	0.5382
2022	06.22	SS	6	700	60840	378	1951	1573	423	463	656	1087	1561	0.1937	0.806	2.6069	4.161	0.4507	0.7521	0.2479	0.2543	0.5891	38.6779	50.5523	0.0553	1.6211	0.3141	1.307	0.7179	0.324	0.8063	0.5493	0.4428	0.4514	0.1999	0.247954	0.2479	233.175	378	73.2363	304.764	167.397	75.5613	1951	378	1573	864	390	0.6169
2022	06.22	SS	6	800	61961	391	1815	1424	433	471	646	1015	1442	0.2154	0.785	2.2411	3.642	0.4382	0.7381	0.2619	0.2669	0.5969	43.5117	59.2708	0.0544	1.7362	0.374	1.3622	0.7653	0.357	0.7846	0.5618	0.4408	0.4662	0.2055	0.261911	0.2619	225.204	391	84.232	306.768	172.342	80.3543	1815	391	1424	800	373	0.576
2022	06.22	SS	6	600	52313	337	1606	1269	372	402	549	920	1281	0.2098	0.79	2.407	3.766	0.4594	0.7439	0.2561	0.2364	0.5569	41.2235	49.9679	0.0687	1.534	0.3219	1.2121	0.6553	0.31	0.7902	0.5406	0.4271	0.4738	0.2024	0.256136	0.2561	219.687	337	70.7154	266.285	143.949	68.1974	1606	337	1269	686	325	0.6519
2022	06.22	SS	6	800	52636	404	1805	1401	438	468	614	982	1400	0.2238	0.776	2.6372	3.468	0.4126	0.7109	0.2891	0.2141	0.4996	37.5704	45.5004	0.047	1.5603	0.3492	1.2111	0.7114	0.35	0.7762	0.5874	0.456	0.4921	0.2244	0.28906	0.2891	258.925	404	90.4244	313.576	184.206	90.6482	1805	404	1401	823	405	0.6409
2022	06.22	SS	6	900	69736	412	1929	1517	448	482	632	1036	1495	0.2136	0.786	2.9384	3.682	0.4113	0.7139	0.2861	0.2241	0.4834	45.9695	54.024	0.0511	1.4944	0.3192	1.1752	0.6918	0.336	0.7864	0.5887	0.4629	0.486	0.225	0.286108	0.2861	275.696	412	87.9959	324.004	190.729	92.6947	1929	412	1517	893	434	0.6692
2022	06.22	SS	7	400	35409	344	1744	1400	402	458	690	1059	1489	0.1972	0.803	1.617	4.07	0.5107	0.8179	0.1821	0.4	0.8238	25.2924	40.798	0.0632	2.0094	0.3964	1.6131	0.7892	0.294	0.8028	0.4893	0.3928	0.3723	0.1462	0.182166	0.1821	171.195	344	67.8532	276.147	135.115	50.2982	1744	344	1400	685	255	0.4977
2022	06.22	SS	7	300	37127	340	1954	1614	404	462	729	1170	1689	0.174	0.826	1.9757	4.747	0.5143	0.8358	0.1642	0.3594	0.8034	23.0028	35.9362	0.0767	1.8913	0.3291	1.5622	0.7589	0.257	0.826	0.4857	0.4012	0.338	0.1356	0.164167	0.1642	179.771	340	59.1607	280.839	136.418	46.1105	1954	340	1614	784	265	0.5287
2022	06.22	SS	7	600	49879	382	1862	1480	454	523	797	1147	1545	0.2052	0.795	1.3264	3.874	0.5169	0.7858	0.2142	0.4662	0.9347	33.7019	60.9425	0.0562	2.275	0.4667	1.8083	0.8736	0.387	0.7948	0.4831	0.384	0.4434	0.1702	0.214207	0.2142	167.912	382	78.3695	303.63	146.686	65.0344	1862	382	1480	715	317	0.4396
2022	06.22	SS	7	700	60582	365	1943	1578	405	441	622	1067	1570	0.1879	0.812	2.992	4.323	0.4449	0.7636	0.2364	0.2281	0.5429	38.3915	46.8501	0.0548	1.5026	0.2823	1.2203	0.6774	0.288	0.8121	0.5551	0.4508	0.4258	0.192	0.236362	0.2364	242.912	365	68.5666	296.433	164.56	70.0695	1943	365	1578	876	373	0.6655
2022	06.22	SS	7	600	43681	368	1725	1357	421	468	675	1049	1449	0.2133	0.787	1.5969	3.688	0.5018	0.7966	0.2034	0.3464	0.7541	32.1897	48.3712	0.0536	1.9102	0.4075	1.5027	0.7486	0.306	0.7867	0.4982	0.3919	0.4083	0.16	0.203415	0.2034	192.65	368	78.5067	289.493	144.213	58.88	1725	368	1357	676	276	0.5235
2022	06.22	SS	7	800	40419	404	1736	1332	447	489	632	912	1491	0.2327	0.767	2.2857	3.297	0.3814	0.8161	0.1839	0.3153	0.5706	30.3448	45.3977	0.0379	1.9498	0.4538	1.4961	0.9255	0.275	0.7673	0.6186	0.4747	0.2973	0.1411	0.18391	0.1839	207.201	404	94.0184	309.982	191.76	57.0161	1736	404	1332	824	245	0.5129
2022	06.22	SS	7	500	43513	332	1703	1371	383	428	635	1019	1394	0.195	0.805	1.8762	4.13	0.5011	0.7746	0.2254	0.3282	0.7367	31.7379	46.6599	0.0635	1.8262	0.356	1.4702	0.7335	0.331	0.805	0.4989	0.4016	0.4518	0.1814	0.225403	0.2254	181.798	332	64.7234	267.277	133.346	60.2396	1703	332	1371	684	309	0.5476
2022	06.22	SS	7	600	59088	377	1886	1509	432	481	708	1112	1531	0.1999	0.8	1.8722	4.003	0.4871	0.7647	0.2353	0.3247	0.7312	39.1569	58.7798	0.0653	1.8762	0.375	1.5011	0.77	0.353	0.8001	0.5129	0.4104	0.4587	0.1882	0.235267	0.2353	200.938	377	75.36	301.64	154.718	70.9624	1886	377	1509	774	355	0.533
2022	06.22	SS	7	400	41794	341	1785	1444	396	442	661	1048	1492	0.191	0.809	1.9724	4.235	0.4896	0.7971	0.2029	0.3186	0.7387	28.9431	43.6671	0.0724	1.865	0.3563	1.5087	0.77	0.306	0.809	0.5104	0.4129	0.3976	0.1641	0.202935	0.2029	182.842	341	65.1434	275.857	140.794	55.9737	1785	341	1444	737	293	0.5362
2022	06.22	SS	8	600	51847	375	2127	1752	435	489	747	1226	1817	0.1763	0.824	2.3302	4.672	0.4857	0.8231	0.1769	0.3082	0.7078	29.5928	43.1199	0.0493	1.769	0.3119	1.4571	0.7493	0.258	0.8237	0.5143	0.4236	0.3441	0.1457	0.176971	0.1769	211.984	375	66.1142	308.886	158.851	54.6544	2127	375	1752	901	310	0.5653
2022	06.22	SS	8	600	49618	374	2137	1763	445	505	791	1264	1841	0.175	0.825	2.0354	4.714	0.5048	0.8321	0.1679	0.3403	0.7884	28.144	43.9553	0.0469	1.8931	0.3313	1.5618	0.7734	0.262	0.825	0.4952	0.4085	0.3391	0.1385	0.167922	0.1679	197.56	374	65.4544	308.546	152.785	51.8035	2137	374	1763	873	296	0.5282
2022	06.22	SS	8	500	40162	349	1629	1280	398	446	637	982	1346	0.2142	0.786	1.6185	3.668	0.4945	0.7789	0.2211	0.375	0.75	31.3769	47.5858	0.0628	1.9301	0.4135	1.5166	0.7666	0.335	0.7858	0.5055	0.3972	0.4374	0.1737	0.221106	0.2211	180.82	349	74.7704	274.23	138.614	60.6304	1629	349	1280	647	283	0.5181
2022	06.22	SS	8	300	35307	332	1774	1442	388	449	694	1076	1525	0.1871	0.813	1.7019	4.343	0.516	0.8273	0.1727	0.423	0.8368	24.4846	39.7106	0.0816	1.9953	0.3734	1.6219	0.7851	0.28	0.8129	0.484	0.3935	0.3567	0.1404	0.172643	0.1727	166.391	332	62.133	269.867	130.629	46.5998	1774	332	1442	698	249	0.5012
2022	06.22	SS	8	700	54615	366	2012	1646	414	462	677	1145	1674	0.1819	0.818	2.5642	4.497	0.4733	0.7947	0.2053	0.2916	0.6298	33.1804	44.1553	0.0474	1.6267	0.2959	1.3308	0.701	0.273	0.8181	0.5267	0.4309	0.3899	0.168	0.20536	0.2053	224.995	366	66.5785	299.421	157.715	61.4851	2012	366	1646	867	338	0.6148
2022	06.22	SS	8	600	46914	414	1978	1564	475	531	772	1169	1665	0.2093	0.791	1.6875	3.778	0.4827	0.7999	0.2001	0.3581	0.763	29.9962	47.4113	0.05	1.999	0.4184	1.5806	0.8176	0.316	0.7907	0.5173	0.409	0.3869	0.1582	0.200143	0.2001	207.104	414	86.6512	327.349	169.326	65.5116	1978	414	1564	809	313	0.5003
2022	06.22	SS	8	290	37781	389	1639	1250	441	486	680	996	1337	0.2373	0.763	1.3538	3.213	0.4856	0.7584	0.2416	0.36	0.776	30.2247	48.2997	0.1042	2.0953	0.4973	1.598	0.822	0.386	0.7627	0.5144	0.3923	0.4697	0.1843	0.241614	0.2416	185.654	389	92.3252	296.675	152.609	71.6766	1639	389	1250	643	302	0.4773
2022	06.22	SS	8	600	40330	404	1687	1283	460	513	728	1064	1411	0.2395	0.761	1.161	3.176	0.5144	0.7849	0.2151	0.4131	0.8418	31.4338	51.4371	0.0524	2.1516	0.5153	1.6364	0.7946	0.352	0.7605	0.4856	0.3693	0.443	0.1636	0.215121	0.2151	187.767	404	96.7493	307.251	149.195	66.096	1687	404	1283	623	276	0.4648
2022	06.22	SS	8	600	45547	429	2134	1705	507	579	878	1278	1844	0.201	0.799	1.5134	3.974	0.4979	0.8299	0.1701	0.4223	0.8778	26.7138	47.0926	0.0445	2.2064	0.4436	1.7629	0.885	0.3	0.799	0.5021	0.4011	0.3388	0.1359	0.170111	0.1701	194.434	429	86.2423	342.758	172.083	58.299	2134	429	1705	856	290	0.4532
2022	06.22	C	9	700	56386	373	1777	1404	419	459	635	1011	1416	0.2099	0.79	2.1737	3.764	0.4544	0.7429	0.2571	0.2849	0.622	40.1611	54.9749	0.0574	1.7325	0.3637	1.3689	0.7468	0.352	0.7901	0.5456	0.4311	0.4713	0.2032	0.257141	0.2571	215.296	373	78.2943	294.706	160.787	75.7755	1777	373	1404	766	361	0.5772
2022	06.22	C	9	800	52297	366	1679	1313	421	473	680	1022	1362	0.218	0.782	1.4675	3.587	0.4996	0.7586	0.2414	0.396	0.7972	39.8302	63.5502	0.0498	2.0403	0.4448	1.5955	0.7984	0.385	0.782	0.5004	0.3913	0.4825	0.1888	0.241443	0.2414	179.385	366	79.7832	286.217	143.217	69.1018	1679	366	1313	657	317	0.4901
2022	06.22	C	9	500	43414	361	1994	1633	421	472	700	1097	1703	0.181	0.819	2.4506	4.524	0.4507	0.8218	0.1782	0.3123	0.692	26.5857	40.8177	0.0532	1.8747	0.3394	1.5353	0.8433	0.274	0.819	0.5493	0.4498	0.3244	0.1459	0.178193	0.1782	192.564	361	65.3566	295.643	162.396	52.6836	1994	361	1633	897	291	0.5334
2022	06.22	C	9	700	60864	343	1803	1460	381	416	584	1013	1453	0.1902	0.81	2.8247	4.257	0.4589	0.7603	0.2397	0.2397	0.5502	41.688	49.9841	0.0596	1.4807	0.2817	1.199	0.6488	0.287	0.8098	0.5411	0.4382	0.443	0.1941	0.239707	0.2397	231.647	343	65.2518	277.748	150.288	66.5835	1803	343	1460	790	350	0.6754
2022	06.22	C	9	800	59889	426	1747	1321	457	483	608	949	1339	0.2438	0.756	2.5702	3.101	0.3959	0.6911	0.3089	0.1968	0.4592	45.336	52.5886	0.0567	1.534	0.3741	1.16	0.7007	0.358	0.7562	0.6041	0.4568	0.5113	0.2335	0.308876	0.3089	277.705	426	103.879	322.121	194.59	99.4894	1747	426	1321	798	408	0.6519
2022	06.22	C	9	800	59272	454	1922	1468	490	522	677	1092	1549	0.2362	0.764	2.298	3.233	0.4346	0.7459	0.2541	0.218	0.5064	40.3757	47.0417	0.0505	1.5254	0.3603	1.1651	0.6587	0.296	0.7638	0.5654	0.4318	0.4494	0.1941	0.254091	0.2541	297.627	454	107.24	346.76	196.056	88.1072	1922	454	1468	830	373	0.6556
2022	06.22	C	9	500	41291	349	1565	1216	384	417	575	951	1296	0.223	0.777	1.8388	3.484	0.4951	0.7788	0.2212	0.2714	0.6195	33.9561	42.4921	0.0679	1.6105	0.3592	1.2514	0.6319	0.277	0.777	0.5049	0.3923	0.4381	0.1719	0.221197	0.2212	216.703	349	77.8281	271.172	136.924	59.9879	1565	349	1216	614	269	0.6209
2022	06.22	C	9	500	45522	427	1818	1391	484	534	761	1122	1496	0.2349	0.765	1.2985	3.258	0.4996	0.7685	0.2315	0.3595	0.8004	32.7257	52.424	0.0655	2.0937	0.4917	1.6019	0.8015	0.371	0.7651	0.5004	0.3828	0.4626	0.1771	0.231485	0.2315	203.945	427	100.291	326.709	163.472	75.6293	1818	427	1391	696	322	0.4776
2022	06.22	C	9	400	40804	310	1664	1354	364	410	623	968	1356	0.1863	0.814	1.9757	4.368	0.486	0.7725	0.2275	0.3397	0.7706	30.1361	47.7842	0.0753	1.9486	0.363	1.5856	0.8151	0.361	0.8137	0.514	0.4183	0.4425	0.1851	0.227445	0.2275	159.089	310	57.7524	252.248	129.663	57.3798	1664	310	1354	696	308	0.5132
2022	06.22	C	10	600	52201	356	1973	1617	409	453	670	1113	1653	0.1804	0.82	2.5489	4.542	0.4682	0.8021	0.1979	0.2721	0.6473	32.2827	44.6358	0.0538	1.6871	0.3044	1.3827	0.7354	0.274	0.8196	0.5318	0.4359	0.3721	0.1622	0.197883	0.1979	211.013	356	64.2352	291.765	155.175	57.7395	1973	356	1617	860	320	0.5927
2022	06.22	C	10	600	50842	369	2078	1709	418	462	676	1142	1749	0.1776	0.822	2.9033	4.631	0.4523	0.8075	0.1925	0.2575	0.5988	29.7498	39.3842	0.0496	1.6097	0.2858	1.3238	0.7251	0.255	0.8224	0.5477	0.4504	0.3515	0.1583	0.192517	0.1925	229.235	369	65.525	303.475	166.21	58.422	2078	369	1709	936	329	0.6212
2022	06.22	C	10	700	49445	390	1981	1591	447	486	711	1153	1661	0.1969	0.803	2.1128	4.079	0.4796	0.7989	0.2011	0.2451	0.6725	31.0781	43.5827	0.0444	1.7461	0.3438	1.4024	0.7298	0.282	0.8031	0.5204	0.418	0.3865	0.1615	0.201135	0.2011	223.355	390	76.7794	313.221	163.009	62.9985	1981	390	1591	828	320	0.5727
2022	06.22	C	10	700	62929	374	2138	1764	419	461	657	1124	1735	0.1749	0.825	3.4859	4.717	0.4252	0.7715	0.2285	0.2381	0.5348	35.674	44.8699	0.051	1.5244	0.2667	1.2578	0.723	0.287	0.8251	0.5748	0.4743	0.3974	0.1885	0.228426	0.2285	245.342	374	65.4238	308.576	177.379	70.4967	2138	374	1764	1014	403	0.656
2022	06.22	C	10	600	49635	368	2177	1809	443	505	794	1253	1870	0.169	0.831	2.215	4.916	0.4892	0.8303	0.1697	0.3427	0.785	27.438	44.0249	0.0457	1.9309	0.3264	1.6045	0.8196	0.272	0.831	0.5108	0.4244	0.3323	0.141	0.169739	0.1697	190.585	368	62.2067	305.793	156.193	51.8953	2177	368	1809	924	307	0.5179
2022	06.22	C	10	800	62136	394	2018	1624	431	466	627	1059	1633	0.1952	0.805	3.4132	4.122	0.4095	0.7629	0.2371	0.2155	0.4782	38.2608	44.6856	0.0478	1.4513	0.2834	1.1679	0.6897	0.277	0.8048	0.5905	0.4752	0.4015	0.1908	0.237086	0.2371	271.481	394	76.9257	317.074	187.238	75.1685	2018	394	1624	959	385	0.6891
2022	06.22	C	10	700	54410	352	1928	1576	400	440	631	1046	1562	0.1826	0.817	2.8925	4.477	0.4404	0.7678	0.2322	0.2538	0.5901	34.5241	46.2643	0.0493	1.6394	0.2993	1.3401	0.75	0.311	0.8174	0.5596	0.4575	0.415	0.1898	0.232234	0.2322	214.713	352	64.2656	287.734	161.029	66.8216	1928	352	1576	882	366	0.61
2022	06.22	C	10	700	51138	356	1897	1541	402	438	630	1026	1541	0.1877	0.812	2.7944	4.329	0.4348	0.769	0.231	0.2336	0.5927	33.1847	45.2368	0.0474	1.6781	0.3149	1.3632	0.7705	0.315	0.8123	0.5652	0.4591	0.4087	0.1877	0.230997	0.231	212.145	356	66.8086	289.191	163.456	66.8086	1897	356	1541	871	356	0.5959
2022	06.22	C	10	700	44214	340	1655	1315	407	462	705	995	1343	0.2054	0.795	1.3892	3.868	0.4981	0.7627	0.2373	0.4183	0.9252	33.6231	62.4551	0.048	2.3378	0.4803	1.8575	0.9323	0.441	0.7946	0.5019	0.3988	0.4727	0.1885	0.237248	0.2373	145.436	340	69.8489	270.151	135.589	64.0967	1655	340	1315	660	312	0.4278
2022	06.22	C	11	800	67728	365	1880	1515	400	430	581	997	1447	0.1941	0.806	3.4184	4.151	0.4172	0.7142	0.2858	0.198	0.4752	44.7053	50.93	0.0559	1.4137	0.2745	1.1392	0.664	0.326	0.8059	0.5828	0.4697	0.4904	0.2303	0.285805	0.2858	258.188	365	70.8644	294.136	171.434	84.0665	1880	365	1515	883	433	0.7074
2022	06.22	C	11	700	61074	360	1985	1625	401	437	616	1045	1559	0.1814	0.819	3.3921	4.514	0.4215	0.7378	0.2622	0.2215	0.5251	37.584	46.82	0.0537	1.5217	0.276	1.2457	0.7206	0.327	0.8186	0.5785	0.4736	0.4532	0.2146	0.262176	0.2622	236.578	360	65.2897	294.71	170.479	77.2594	1985	360	1625	940	426	0.6572
2022	06.22	C	11	700	62377	380	2001	1621	415	446	602	1044	1602	0.1899	0.81	3.7242	4.266	0.4096	0.7539	0.2461	0.1912	0.4565	38.4805	42.8849	0.055	1.3757	0.2613	1.1145	0.6579	0.274	0.8101	0.5904	0.4783	0.4169	0.1994	0.246138	0.2461	276.223	380	72.1639	307.836	181.739	75.7721	2001	380	1621	957	399	0.7269
2022	06.22	C	11	500	29363	360	1449	1089	451	546	812	994	1262	0.2484	0.752	0.5721	3.025	0.5822	0.8283	0.1717	0.8724	1.3835	26.9629	64.0758	0.0539	3.162	0.7856	2.3764	0.9929	0.408	0.7516	0.4178	0.314	0.411	0.1291	0.171716	0.1717	113.852	360	89.441	270.559	113.043	46.4596	1449	360	1089	455	187	0.3163
2022	06.22	C	11	600	50453	410	2084	1674	456	502	708	1181	1771	0.1967	0.803	2.4845	4.083	0.4606	0.813	0.187	0.2748	0.5934	30.1393	38.8305	0.0502	1.6039	0.3156	1.2884	0.695	0.241	0.8033	0.5394	0.4333	0.3466	0.1502	0.186956	0.187	255.627	410	80.6622	329.338	177.654	61.5787	2084	410	1674	903	313	0.6235
2022	06.22	C	11	600	51312	391	2109	1718	440	481	689	1180	1800	0.1854	0.815	2.7895	4.394	0.4593	0.8201	0.1799	0.2386	0.5782	29.8674	37.6024	0.0498	1.5455	0.2865	1.259	0.6808	0.226	0.8146	0.5407	0.4405	0.3326	0.1465	0.179837	0.1799	252.993	391	72.4898	318.51	172.233	57.2873	2109	391	1718	929	309	0.647
2022	06.22	C	11	600	51702	377	2004	1627	426	469	675	1124	1687	0.1881	0.812	2.5867	4.316	0.4591	0.8052	0.1948	0.2643	0.6105	31.7772	42.2562	0.053	1.6379	0.3081	1.3298	0.7192	0.259	0.8119	0.5409	0.4391	0.3602	0.1582	0.194832	0.1948	230.173	377	70.9227	306.077	165.549	59.6352	2004	377	1627	880	317	0.6105
2022	06.22	C	11	600	49604	404	2044	1640	458	506	720	1166	1731	0.1977	0.802	2.2624	4.059	0.4646	0.8091	0.1909	0.2927	0.6423	30.2466	41.8107	0.0504	1.7229	0.3405	1.3823	0.7401	0.264	0.8023	0.5354	0.4295	0.3565	0.1531	0.19087	0.1909	234.488	404	79.8513	324.149	173.538	61.865	2044	404	1640	878	313	0.5804
2022	06.22	C	11	900	67223	391	1907	1516	419	448	550	832	1601	0.205	0.795	5.2098	3.877	0.2909	0.7982	0.2018	0.1913	0.3496	44.3422	53.291	0.0493	1.5118	0.31	1.2018	0.8522	0.243	0.795	0.7091	0.5637	0.2847	0.1605	0.201881	0.2018	258.632	391	80.1683	310.832	220.412	62.7404	1907	391	1516	1075	306	0.6615
2022	06.22	C	12	400	37607	358	2093	1735	478	589	979	1297	1827	0.171	0.829	1.2874	4.846	0.5412	0.8467	0.1533	0.6398	1.1931	21.6753	47.7825	0.0542	2.6593	0.4549	2.2045	1.0114	0.338	0.829	0.4588	0.3803	0.3342	0.1271	0.153331	0.1533	134.622	358	61.2346	296.765	136.153	45.4983	2093	358	1735	796	266	0.376
2022	06.22	C	12	700	65092	366	2089	1723	402	433	590	1037	1651	0.1752	0.825	4.5589	4.708	0.3894	0.7458	0.2542	0.1799	0.4334	37.7786	42.0388	0.054	1.3491	0.2364	1.1128	0.6794	0.283	0.8248	0.6106	0.5036	0.4163	0.2097	0.254193	0.2542	271.292	366	64.1245	301.875	184.314	76.7391	2089	366	1723	1052	438	0.7412
2022	06.22	C	12	700	54821	365	2228	1863	411	445	643	1138	1827	0.1638	0.836	4.1835	5.104	0.4149	0.7848	0.2152	0.1825	0.4974	29.4262	35.2759	0.042	1.4337	0.2349	1.1988	0.7014	0.258	0.8362	0.5851	0.4892	0.3679	0.18	0.215258	0.2152	254.586	365	59.7958	305.204	178.568	65.6934	2228	365	1863	1090	401	0.6975
2022	06.22	C	12	600	52923	402	2311	1909	461	511	754	1281	1981	0.174	0.826	2.8696	4.749	0.4605	0.8271	0.1729	0.2619	0.6146	27.7229	37.006	0.0462	1.6159	0.2811	1.3349	0.7202	0.231	0.826	0.5395	0.4457	0.3204	0.1428	0.172856	0.1729	248.778	402	69.9282	332.072	179.169	57.4037	2311	402	1909	1030	330	0.6188
2022	06.22	C	12	700	51222	379	2089	1710	436	484	723	1188	1775	0.1814	0.819	2.4184	4.512	0.4731	0.8164	0.1836	0.2807	0.6706	29.9542	42.4567	0.0428	1.7315	0.3141	1.4174	0.7468	0.26	0.8186	0.5269	0.4313	0.3485	0.1503	0.183625	0.1836	218.885	379	68.7607	310.239	163.465	56.9679	2089	379	1710	901	314	0.5775
2022	06.22	C	12	400	42330	339	1916	1577	388	432	643	1075	1624	0.1769	0.823	2.6481	4.652	0.4667	0.8148	0.1852	0.279	0.6426	26.8424	36.9569	0.0671	1.6728	0.296	1.3768	0.7342	0.255	0.8231	0.5333	0.4389	0.3472	0.1524	0.185162	0.1852	202.654	339	59.9796	279.02	148.799	51.6639	1916	339	1577	841	292	0.5978
2022	06.22	C	12	600	55790	423	2070	1647	475	517	725	1160	1719	0.2043	0.796	2.3337	3.894	0.4475	0.7869	0.2131	0.255	0.6112	33.8738	46.2681	0.0565	1.7167	0.3508	1.3659	0.7547	0.291	0.7957	0.5525	0.4396	0.3857	0.1696	0.213099	0.2131	246.403	423	86.4391	336.561	185.957	71.7261	2070	423	1647	910	351	0.5825
2022	06.22	C	12	600	52202	379	1972	1593	422	464	653	1084	1622	0.1922	0.808	2.751	4.203	0.4426	0.7803	0.2197	0.2637	0.5733	32.7698	42.4536	0.0546	1.6037	0.3082	1.2955	0.7222	0.285	0.8078	0.5574	0.4503	0.3941	0.1775	0.219671	0.2197	236.328	379	72.8403	306.16	170.665	67.2667	1972	379	1593	888	350	0.6235
2022	06.22	C	12	700	54344	391	2070	1679	442	480	685	1147	1733	0.1889	0.811	2.7337	4.294	0.4503	0.7993	0.2007	0.2263	0.5837	32.3668	41.957	0.0462	1.5982	0.3019	1.2963	0.7126	0.26	0.8111	0.5497	0.4459	0.3651	0.1628	0.200695	0.2007	244.65	391	73.8556	317.144	174.344	63.6556	2070	391	1679	923	337	0.6257
2022	06.22	C	13	600	53428	375	2243	1868	434	488	731	1194	1855	0.1672	0.833	3.056	4.981	0.4384	0.7923	0.2077	0.2891	0.6353	28.602	41.442	0.0477	1.7398	0.2909	1.4489	0.8137	0.301	0.8328	0.5616	0.4677	0.3699	0.173	0.207736	0.2077	215.542	375	62.6951	312.305	175.379	64.8685	2243	375	1868	1049	388	0.5748
2022	06.22	C	13	600	51213	387	2202	1815	443	494	725	1192	1831	0.1757	0.824	2.8878	4.69	0.4435	0.7956	0.2044	0.281	0.6208	28.2163	39.4911	0.047	1.698	0.2984	1.3996	0.7788	0.286	0.8243	0.5565	0.4587	0.3673	0.1685	0.204402	0.2044	227.915	387	68.015	318.985	177.507	65.203	2202	387	1815	1010	371	0.5889
2022	06.22	C	13	600	49681	368	2223	1855	425	476	719	1179	1860	0.1655	0.834	3.1278	5.041	0.4372	0.8043	0.1957	0.2749	0.6307	26.7823	38.6378	0.0446	1.7289	0.2862	1.4427	0.8119	0.282	0.8345	0.5628	0.4696	0.3477	0.1633	0.195686	0.1957	212.852	368	60.9195	307.08	172.826	60.0918	2223	368	1855	1044	363	0.5784
2022	06.22	C	13	700	56040	380	1933	1553	428	467	663	1094	1577	0.1966	0.803	2.4336	4.087	0.4598	0.7708	0.2292	0.2511	0.6074	36.0848	47.6751	0.0515	1.6445	0.3233	1.3212	0.7138	0.303	0.8034	0.5402	0.434	0.4243	0.1842	0.229207	0.2292	231.073	380	74.7025	305.298	164.935	69.9845	1933	380	1553	839	356	0.6081
2022	06.22	C	13	800	55753	369	1748	1379	409	446	615	1013	1400	0.2111	0.789	2.2022	3.737	0.467	0.7476	0.2524	0.2683	0.5946	40.4298	51.479	0.0505	1.614	0.3407	1.2733	0.6787	0.321	0.7889	0.533	0.4205	0.4735	0.1991	0.252375	0.2524	228.625	369	77.8953	291.105	155.157	73.4622	1748	369	1379	735	348	0.6196
2022	06.22	C	13	700	49731	369	1651	1282	415	455	636	998	1336	0.2235	0.776	1.6495	3.474	0.4906	0.7543	0.2457	0.312	0.6942	38.7919	54.8884	0.0554	1.8222	0.4073	1.4149	0.7207	0.348	0.7765	0.5094	0.3955	0.4824	0.1908	0.245735	0.2457	202.502	369	82.4718	286.528	145.946	70.4028	1651	369	1282	653	315	0.5488
2022	06.22	C	13	700	69612	453	2241	1788	503	548	762	1257	1808	0.2021	0.798	2.5071	3.947	0.4497	0.7578	0.2422	0.2517	0.5761	38.9326	49.8764	0.0556	1.6057	0.3246	1.2811	0.705	0.31	0.7979	0.5503	0.4391	0.44	0.1932	0.242132	0.2422	282.12	453	91.5703	361.43	198.908	87.5274	2241	453	1788	984	433	0.6228
2022	06.22	C	13	700	46471	370	1542	1172	411	451	625	991	1285	0.2399	0.76	1.3005	3.168	0.5299	0.7807	0.2193	0.3413	0.7253	39.6511	54.2729	0.0566	1.8009	0.4321	1.3688	0.6435	0.3	0.7601	0.4701	0.3573	0.4664	0.1667	0.219255	0.2193	205.453	370	88.7808	281.219	132.211	61.6667	1542	370	1172	551	257	0.5553
2022	06.22	C	13	700	65527	411	2071	1660	456	495	679	1106	1666	0.1985	0.802	2.9142	4.039	0.4187	0.756	0.244	0.2349	0.5382	39.4743	50.7392	0.0564	1.6036	0.3182	1.2854	0.7472	0.314	0.8015	0.5813	0.466	0.4197	0.1956	0.243972	0.244	256.298	411	81.5649	329.435	191.509	80.3742	2071	411	1660	965	405	0.6236
2022	06.22	C	14	600	44922	410	2053	1643	469	521	748	1166	1709	0.1997	0.8	2.104	4.007	0.4601	0.7906	0.2094	0.3165	0.6857	27.3415	40.747	0.0456	1.8622	0.3719	1.4903	0.8046	0.312	0.8003	0.5399	0.4321	0.3878	0.1676	0.209373	0.2094	220.17	410	81.8802	328.12	177.141	68.6995	2053	410	1643	887	344	0.537
2022	06.22	C	14	600	50032	391	2046	1655	439	485	685	1107	1666	0.1911	0.809	2.7338	4.233	0.4326	0.7704	0.2296	0.2779	0.5921	30.2308	41.3773	0.0504	1.6921	0.3234	1.3687	0.7766	0.314	0.8089	0.5674	0.4589	0.4047	0.1857	0.229627	0.2296	231.074	391	74.7219	316.278	179.447	72.6197	2046	391	1655	939	380	0.591
2022	06.22	C	14	900	60756	508	1906	1398	582	650	911	1228	1573	0.2665	0.733	0.849	2.752	0.515	0.7618	0.2382	0.4864	0.9609	43.459	81.0833	0.0483	2.5437	0.678	1.8657	0.9048	0.444	0.7335	0.485	0.3557	0.4912	0.1747	0.238232	0.2382	199.709	508	135.396	372.604	180.705	88.7534	1906	508	1398	678	333	0.3931
2022	06.22	C	14	700	50617	409	1872	1463	457	500	693	1100	1550	0.2185	0.782	1.8998	3.577	0.4723	0.7799	0.2201	0.2939	0.6471	34.598	47.3991	0.0494	1.753	0.383	1.37	0.7229	0.302	0.7815	0.5277	0.4124	0.4171	0.172	0.220104	0.2201	233.314	409	89.3595	319.64	168.669	70.3515	1872	409	1463	772	322	0.5705
2022	06.22	C	14	700	86737	444	2147	1703	493	533	720	1140	1715	0.2068	0.793	2.7751	3.836	0.4087	0.7463	0.2537	0.2349	0.5402	50.932	67.3239	0.0728	1.6665	0.3446	1.3218	0.7816	0.335	0.7932	0.5913	0.469	0.429	0.2012	0.253668	0.2537	266.427	444	91.8193	352.181	208.248	89.3377	2147	444	1703	1007	432	0.6001
2022	06.22	C	14	700	60027	385	1941	1556	422	453	607	1008	1545	0.1984	0.802	3.4041	4.042	0.4004	0.7455	0.2545	0.1992	0.4756	38.5778	45.8227	0.0551	1.4817	0.2939	1.1878	0.7122	0.302	0.8016	0.5996	0.4807	0.4244	0.204	0.25447	0.2545	259.837	385	76.3653	308.635	185.062	78.5471	1941	385	1556	933	396	0.6749
2022	06.22	C	14	700	54719	420	1761	1341	456	488	643	1020	1398	0.2385	0.761	2.0198	3.193	0.4474	0.7293	0.2707	0.2386	0.5543	40.8048	50.5526	0.0583	1.6269	0.388	1.2389	0.6846	0.335	0.7615	0.5526	0.4208	0.4899	0.2061	0.270719	0.2707	258.16	420	100.17	319.83	176.729	86.5758	1761	420	1341	741	363	0.6147
2022	06.22	C	14	600	45813	377	1710	1333	415	454	584	834	1422	0.2205	0.78	2.9161	3.536	0.3428	0.7839	0.2161	0.2926	0.5176	34.3685	51.8911	0.0573	1.9369	0.427	1.5098	0.9922	0.326	0.7795	0.6572	0.5123	0.3288	0.1684	0.216087	0.2161	194.641	377	83.1164	293.884	193.13	63.4947	1710	377	1333	876	288	0.5163
2022	06.22	C	14	700	53271	384	1681	1297	426	462	622	987	1343	0.2284	0.772	1.8998	3.378	0.4649	0.7394	0.2606	0.2776	0.6117	41.0724	54.0367	0.0587	1.7052	0.3895	1.3156	0.704	0.343	0.7716	0.5351	0.4128	0.487	0.2011	0.260594	0.2606	225.194	384	87.7192	296.281	158.534	77.2112	1681	384	1297	694	338	0.5865
2022	06.22	C	15	600	37839	364	1798	1434	452	535	845	1156	1496	0.2024	0.798	1.0484	3.94	0.5523	0.7894	0.2106	0.5788	1.1181	26.3872	53.4186	0.044	2.5383	0.5139	2.0244	0.9063	0.426	0.7976	0.4477	0.3571	0.4704	0.168	0.210598	0.2106	143.403	364	73.6908	290.309	129.971	61.139	1798	364	1434	642	302	0.394
2022	06.22	C	15	600	50880	376	2016	1640	423	467	663	1087	1609	0.1865	0.813	2.8713	4.362	0.4335	0.7518	0.2482	0.2683	0.5833	31.0246	41.7443	0.0517	1.654	0.3085	1.3455	0.7622	0.334	0.8135	0.5665	0.4608	0.4381	0.2019	0.248184	0.2482	227.328	376	70.127	305.873	173.266	75.9087	2016	376	1640	929	407	0.6046
2022	06.22	C	15	600	56010	404	2310	1906	455	498	712	1198	1901	0.1749	0.825	3.5136	4.718	0.4166	0.7854	0.2146	0.2256	0.5386	29.3861	37.9972	0.049	1.5671	0.2741	1.293	0.7544	0.277	0.8251	0.5834	0.4814	0.3678	0.1771	0.214575	0.2146	257.801	404	70.6563	333.344	194.48	71.5307	2310	404	1906	1112	409	0.6381
2022	06.22	C	15	800	59728	389	1855	1466	424	456	609	1004	1477	0.2097	0.79	2.8802	3.769	0.4195	0.7422	0.2578	0.2183	0.5002	40.7422	48.5815	0.0509	1.5088	0.3164	1.1924	0.6922	0.307	0.7903	0.5805	0.4588	0.4442	0.2038	0.257858	0.2578	257.821	389	81.5747	307.425	178.458	79.2679	1855	389	1466	851	378	0.6628
2022	06.22	C	15	600	57963	415	2129	1714	461	500	691	1156	1777	0.1949	0.805	2.9305	4.13	0.4323	0.7946	0.2054	0.2275	0.5368	33.8174	41.9865	0.0564	1.5422	0.3006	1.2416	0.7048	0.255	0.8051	0.5677	0.457	0.3618	0.1653	0.205394	0.2054	269.096	415	80.8948	334.105	189.664	68.6144	2129	415	1714	973	352	0.6484
2022	06.22	C	15	700	57602	383	2008	1625	422	456	627	1072	1638	0.1907	0.809	3.2928	4.243	0.424	0.7723	0.2277	0.2092	0.5005	35.4477	41.8444	0.0506	1.4587	0.2782	1.1805	0.6799	0.269	0.8093	0.576	0.4661	0.3953	0.1843	0.227693	0.2277	262.563	383	73.0523	309.948	178.53	70.5727	2008	383	1625	936	370	0.6856
2022	06.22	C	15	700	63997	400	1867	1467	437	471	633	1046	1480	0.2142	0.786	2.5385	3.668	0.4404	0.7362	0.2638	0.2318	0.5294	43.6243	52.4482	0.0623	1.5301	0.3278	1.2023	0.6728	0.317	0.7858	0.5596	0.4397	0.4714	0.2073	0.263795	0.2638	261.421	400	85.699	314.301	175.897	82.9138	1867	400	1467	821	387	0.6536
2022	06.22	C	15	600	52305	312	1678	1366	344	373	509	888	1328	0.1859	0.814	3.5732	4.378	0.4217	0.7438	0.2562	0.2123	0.4807	38.2909	43.6534	0.0638	1.4004	0.2604	1.14	0.6593	0.292	0.8141	0.5783	0.4708	0.443	0.2086	0.256187	0.2562	222.793	312	58.0119	253.988	146.889	65.0775	1678	312	1366	790	350	0.7141
2022	06.22	C	15	800	59936	380	1864	1484	419	454	616	1015	1475	0.2039	0.796	2.7962	3.905	0.4279	0.7379	0.2621	0.2358	0.5301	40.3884	50.0349	0.0505	1.5561	0.3172	1.2388	0.7087	0.325	0.7961	0.5721	0.4555	0.4582	0.2087	0.262136	0.2621	244.2	380	77.4678	302.532	173.079	79.3026	1864	380	1484	849	389	0.6426
2022	06.22	C	16	800	35800	380	1730	1350	415	447	599	956	1356	0.2197	0.78	2.4495	3.553	0.4267	0.723	0.277	0.237	0.5407	26.5182	33.6082	0.0331	1.6241	0.3567	1.2674	0.7266	0.351	0.7803	0.5733	0.4474	0.4832	0.2162	0.277019	0.277	233.976	380	83.4682	296.532	170.012	82.1503	1730	380	1350	774	374	0.6157
2022	06.22	C	16	700	53942	365	1907	1542	406	442	615	1039	1553	0.1914	0.809	2.9651	4.225	0.4371	0.7704	0.2296	0.2335	0.5404	34.9822	43.2519	0.05	1.5291	0.2927	1.2364	0.696	0.284	0.8086	0.5629	0.4552	0.4078	0.1856	0.229551	0.2296	238.703	365	69.861	295.139	166.135	67.7556	1907	365	1542	868	354	0.654
2022	06.22	C	16	500	45447	326	1846	1520	368	405	578	980	1509	0.1766	0.823	3.2983	4.663	0.4303	0.7783	0.2217	0.2434	0.5526	29.8996	38.4032	0.0598	1.5599	0.2755	1.2844	0.7318	0.285	0.8234	0.5697	0.4691	0.3891	0.1826	0.22167	0.2217	208.988	326	57.571	268.429	152.934	59.5135	1846	326	1520	866	337	0.6411
2022	06.22	C	16	700	55161	400	1923	1523	454	501	716	1105	1562	0.208	0.792	1.9515	3.808	0.4629	0.763	0.237	0.3086	0.6916	36.2189	54.1143	0.0517	1.8865	0.3924	1.4941	0.8025	0.354	0.792	0.5371	0.4254	0.4413	0.1877	0.237022	0.237	212.033	400	83.2033	316.797	170.151	75.091	1923	400	1523	818	361	0.5301
2022	06.22	C	16	600	51591	411	1968	1557	463	507	715	1118	1623	0.2088	0.791	2.0951	3.788	0.4541	0.7784	0.2216	0.2826	0.6508	33.135	47.4919	0.0552	1.8116	0.3783	1.4333	0.7825	0.318	0.7912	0.5459	0.4319	0.4059	0.1753	0.221581	0.2216	226.871	411	85.8338	325.166	177.515	72.0503	1968	411	1557	850	345	0.552
2022	06.22	C	16	600	54112	389	2058	1669	441	487	699	1125	1695	0.189	0.811	2.618	4.29	0.441	0.7825	0.2175	0.2756	0.6191	32.422	45.5201	0.054	1.7312	0.3272	1.404	0.7849	0.305	0.811	0.559	0.4534	0.3891	0.1764	0.217507	0.2175	224.7	389	73.5282	315.472	176.354	68.6137	2058	389	1669	933	363	0.5776
2022	06.22	C	16	400	42225	334	1838	1504	378	418	605	1022	1538	0.1817	0.818	2.7737	4.503	0.4574	0.8005	0.1995	0.266	0.6006	28.0751	36.8622	0.0702	1.6046	0.2916	1.313	0.7124	0.262	0.8183	0.5426	0.444	0.3676	0.1632	0.19946	0.1995	208.152	334	60.6942	273.306	148.283	54.5158	1838	334	1504	816	300	0.6232
2022	06.22	C	16	600	46695	383	2156	1773	447	504	754	1171	1789	0.1776	0.822	2.5268	4.629	0.4444	0.793	0.207	0.3215	0.6975	26.3368	41.3323	0.0439	1.9084	0.339	1.5694	0.8719	0.325	0.8224	0.5556	0.4569	0.3726	0.1702	0.207017	0.207	200.692	383	68.0376	314.962	174.979	65.1953	2156	383	1773	985	367	0.524
2022	06.22	C	16	612	48121.6	373.5	1928.25	1554.75	421.5	463.875	660.125	1064.5	1578.12	0.1941	0.80575	2.58475	4.18237	0.444237	0.773638	0.226363	0.271025	0.611662	30.9485	42.573	0.0522375	1.70692	0.331675	1.37525	0.763575	0.3105	0.8059	0.555763	0.447913	0.407075	0.18215	0.226353	0.226363	219.264	373.5	72.7747	300.725	167.045	68.1107	1928.25	373.5	1554.75	863.75	350.125	0.589712
2022	06.22	CS	17	700	48894	350	1889	1539	403	449	662	1090	1580	0.1853	0.815	2.2936	4.397	0.4808	0.7992	0.2008	0.2989	0.6758	31.77	44.6497	0.0454	1.725	0.3196	1.4054	0.7296	0.282	0.8147	0.5192	0.423	0.3867	0.1636	0.200775	0.2008	202.899	350	64.8491	285.151	148.041	57.2525	1889	350	1539	799	309	0.5797
2022	06.22	CS	17	600	52188	355	2135	1780	417	468	724	1207	1815	0.1663	0.834	2.6283	5.014	0.4787	0.8202	0.1798	0.2865	0.691	29.3191	42.3269	0.0489	1.7316	0.2879	1.4437	0.7527	0.26	0.8337	0.5213	0.4347	0.3448	0.1499	0.179744	0.1798	205.013	355	59.0281	295.972	154.304	53.2084	2135	355	1780	928	320	0.5775
2022	06.22	CS	17	700	52272	362	2073	1711	417	465	697	1157	1742	0.1746	0.825	2.6668	4.727	0.4646	0.8065	0.1935	0.2805	0.6526	30.5507	42.9118	0.0436	1.7018	0.2972	1.4046	0.752	0.272	0.8254	0.5354	0.4419	0.3614	0.1597	0.193494	0.1935	212.716	362	63.2147	298.785	159.958	57.8013	2073	362	1711	916	331	0.5876
2022	06.22	CS	17	700	49253	405	1622	1217	453	490	672	1011	1331	0.2497	0.75	1.2899	3.005	0.4979	0.7609	0.2391	0.304	0.7313	40.4709	59.4374	0.0578	1.9574	0.4887	1.4686	0.7373	0.351	0.7503	0.5021	0.3767	0.4763	0.1794	0.23915	0.2391	206.907	405	101.125	303.875	152.562	72.6603	1622	405	1217	611	291	0.5109
2022	06.22	CS	17	600	43922	349	1634	1285	388	426	586	928	1333	0.2136	0.786	2.1564	3.682	0.4506	0.7658	0.2342	0.2957	0.6148	34.1808	46.637	0.057	1.735	0.3706	1.3644	0.7496	0.32	0.7864	0.5494	0.4321	0.4263	0.1842	0.234209	0.2342	201.153	349	74.5416	274.458	150.792	64.2895	1634	349	1285	706	301	0.5764
2022	06.22	CS	17	600	46779	402	1760	1358	451	496	695	1084	1469	0.2284	0.772	1.5034	3.378	0.5022	0.7857	0.2143	0.3314	0.7192	34.4469	49.3301	0.0574	1.856	0.4239	1.4321	0.7129	0.307	0.7716	0.4978	0.3841	0.4305	0.1653	0.214303	0.2143	216.595	402	91.8205	310.18	154.405	66.467	1760	402	1358	676	291	0.5388
2022	06.22	CS	17	600	42048	362	1613	1251	407	448	626	992	1341	0.2244	0.776	1.5762	3.456	0.5036	0.7826	0.2174	0.3277	0.7034	33.6115	46.9494	0.056	1.801	0.4042	1.3968	0.6934	0.304	0.7756	0.4964	0.385	0.438	0.1686	0.217423	0.2174	200.999	362	81.2424	280.758	139.369	61.044	1613	362	1251	621	272	0.5552
2022	06.22	CS	17	500	34672	312	1506	1194	357	399	593	926	1229	0.2072	0.793	1.5656	3.827	0.5142	0.768	0.232	0.3518	0.7845	29.0389	44.2993	0.0581	1.9241	0.3986	1.5255	0.741	0.354	0.7928	0.4858	0.3851	0.4776	0.1839	0.232018	0.232	162.154	312	64.6375	247.363	120.159	57.3865	1506	312	1194	580	277	0.5197
2022	06.22	CS	17	800	51897	369	1637	1268	413	451	621	949	1294	0.2254	0.775	1.8167	3.436	0.4574	0.7295	0.2705	0.2997	0.6625	40.928	59.275	0.0512	1.8697	0.4215	1.4483	0.7858	0.392	0.7746	0.5426	0.4203	0.4985	0.2095	0.270486	0.2705	197.358	369	83.1772	285.823	155.084	77.3164	1637	369	1268	688	343	0.5348
2022	06.22	CS	18	600	51396	344	1841	1497	402	459	694	1094	1528	0.1869	0.813	1.8881	4.352	0.501	0.7909	0.2091	0.3808	0.7793	34.3327	53.4064	0.0572	1.913	0.3575	1.5556	0.7762	0.325	0.8131	0.499	0.4058	0.419	0.17	0.209081	0.2091	179.822	344	64.2781	279.722	139.581	58.4856	1841	344	1497	747	313	0.5227
2022	06.22	CS	18	900	48161	380	1714	1334	458	528	786	1085	1422	0.2217	0.778	1.0582	3.511	0.5285	0.7811	0.2189	0.5247	1.0145	36.103	69.3042	0.0401	2.4664	0.5468	1.9196	0.9051	0.42	0.7783	0.4715	0.367	0.4642	0.1704	0.21887	0.2189	154.071	380	84.2474	295.753	139.452	64.7375	1714	380	1334	629	292	0.4054
2022	06.22	CS	18	500	41323	328	1619	1291	377	422	616	977	1353	0.2026	0.797	1.7491	3.936	0.5027	0.794	0.206	0.3486	0.7436	32.0086	47.3471	0.064	1.855	0.3758	1.4792	0.7356	0.305	0.7974	0.4973	0.3965	0.4143	0.1643	0.206031	0.206	176.819	328	66.4509	261.549	130.065	53.8901	1619	328	1291	642	266	0.5391
2022	06.22	CS	18	600	48683	352	1673	1321	389	424	576	962	1340	0.2104	0.79	2.3514	3.753	0.4618	0.7479	0.2521	0.265	0.5652	36.8533	45.1101	0.0614	1.5502	0.3262	1.224	0.6588	0.309	0.7896	0.5382	0.425	0.4684	0.199	0.252093	0.2521	227.067	352	74.061	277.939	149.595	70.0634	1673	352	1321	711	333	0.6451
2022	06.22	CS	18	800	64181	414	1881	1467	454	489	658	1064	1476	0.2201	0.78	2.3134	3.543	0.4431	0.7239	0.2761	0.2386	0.5544	43.75	54.7436	0.0547	1.6044	0.3531	1.2513	0.6969	0.345	0.7799	0.5569	0.4343	0.4957	0.2153	0.276055	0.2761	258.04	414	91.1196	322.88	179.818	89.1388	1881	414	1467	817	405	0.6233
2022	06.22	CS	18	300	38324	338	1774	1436	401	458	709	1090	1491	0.1905	0.809	1.5851	4.249	0.5237	0.8029	0.1971	0.3969	0.8612	26.6882	43.8889	0.089	2.0316	0.3871	1.6445	0.7833	0.324	0.8095	0.4763	0.3856	0.4137	0.1595	0.197045	0.1971	166.371	338	64.3991	273.601	130.322	53.92	1774	338	1436	684	283	0.4922
2022	06.22	CS	18	500	41435	325	1629	1304	364	398	551	875	1270	0.1995	0.8	2.6789	4.012	0.4218	0.7247	0.2753	0.2607	0.5777	31.7751	43.5222	0.0636	1.7111	0.3414	1.3697	0.792	0.377	0.8005	0.5782	0.4629	0.4761	0.2204	0.275281	0.2753	189.936	325	64.8404	260.16	150.43	71.6237	1629	325	1304	754	359	0.5844
2022	06.22	CS	18	800	44183	376	1626	1250	424	470	658	963	1294	0.2312	0.769	1.5022	3.324	0.4696	0.7344	0.2656	0.368	0.752	35.3467	56.6028	0.0442	2.0831	0.4817	1.6014	0.8494	0.425	0.7688	0.5304	0.4077	0.5008	0.2042	0.265624	0.2656	180.5	376	86.9471	289.053	153.314	76.7724	1626	376	1250	663	332	0.4801
2022	06.22	CS	18	700	47733	376	1622	1246	421	457	628	965	1295	0.2318	0.768	1.6592	3.314	0.4727	0.7376	0.2624	0.2889	0.6742	38.3094	54.6348	0.0547	1.8565	0.4304	1.4261	0.752	0.374	0.7682	0.5273	0.4051	0.4977	0.2016	0.262437	0.2624	202.532	376	87.1615	288.839	152.301	75.8027	1622	376	1246	657	327	0.5386
2022	06.22	CS	19	600	50541	355	2240	1885	416	471	726	1225	1886	0.1585	0.842	3.0562	5.31	0.4615	0.8122	0.1878	0.2918	0.6561	26.812	38.1121	0.0447	1.6892	0.2677	1.4215	0.7654	0.267	0.8415	0.5385	0.4531	0.3488	0.158	0.187829	0.1878	210.159	355	56.2612	298.739	160.859	56.1027	2240	355	1885	1015	354	0.592
2022	06.22	CS	19	900	64104	384	2022	1638	415	445	560	907	1623	0.1899	0.81	5.4729	4.266	0.3193	0.7564	0.2436	0.1832	0.3582	39.1354	43.8995	0.0435	1.3847	0.263	1.1217	0.7636	0.273	0.8101	0.6807	0.5514	0.3578	0.1973	0.243554	0.2436	277.316	384	72.9258	311.074	211.751	75.7745	2022	384	1638	1115	399	0.7222
2022	06.22	CS	19	600	51152	379	2128	1749	443	499	745	1197	1779	0.1781	0.822	2.412	4.615	0.4677	0.8005	0.1995	0.3202	0.6975	29.2462	43.619	0.0487	1.8146	0.3232	1.4914	0.7939	0.298	0.8219	0.5323	0.4375	0.3749	0.164	0.199559	0.1995	208.861	379	67.5005	311.5	165.812	62.1574	2128	379	1749	931	349	0.5511
2022	06.22	CS	19	600	54779	391	2139	1748	451	504	754	1219	1806	0.1828	0.817	2.3148	4.471	0.4737	0.8095	0.1905	0.3032	0.6922	31.3381	45.796	0.0522	1.7882	0.3269	1.4614	0.7691	0.278	0.8172	0.5263	0.4301	0.362	0.1557	0.190521	0.1905	218.656	391	71.4731	319.527	168.172	60.871	2139	391	1748	920	333	0.5592
2022	06.22	CS	19	600	50044	392	2154	1762	444	487	707	1194	1824	0.182	0.818	2.8014	4.495	0.4552	0.8127	0.1873	0.244	0.5959	28.4017	37.1843	0.0473	1.6005	0.2913	1.3092	0.7133	0.245	0.818	0.5448	0.4457	0.3438	0.1532	0.187302	0.1873	244.923	392	71.3389	320.661	174.708	60.0557	2154	392	1762	960	330	0.6248
2022	06.22	CS	19	700	47722	406	1905	1499	461	508	730	1136	1569	0.2131	0.787	1.7239	3.692	0.487	0.7759	0.2241	0.3135	0.7205	31.8362	47.1001	0.0455	1.8802	0.4007	1.4795	0.759	0.332	0.7869	0.513	0.4037	0.4369	0.1764	0.22413	0.2241	215.934	406	86.5281	319.472	163.892	71.6094	1905	406	1499	769	336	0.5319
2022	06.22	CS	19	500	39270	332	1828	1496	380	423	604	953	1576	0.1816	0.818	2.9657	4.506	0.4151	0.8316	0.1684	0.2874	0.6061	26.2498	38.325	0.0525	1.784	0.324	1.46	0.854	0.246	0.8184	0.5849	0.4787	0.288	0.1379	0.168451	0.1684	186.099	332	60.2976	271.702	158.917	45.7681	1828	332	1496	875	252	0.5605
2022	06.22	CS	19	600	52644	352	1983	1631	403	449	665	1097	1649	0.1775	0.822	2.6969	4.634	0.4568	0.7952	0.2048	0.282	0.6397	32.2771	45.2024	0.0538	1.7027	0.3022	1.4004	0.7608	0.287	0.8225	0.5432	0.4468	0.377	0.1684	0.204786	0.2048	206.73	352	62.4831	289.517	157.273	59.2879	1983	352	1631	886	334	0.5873
2022	06.22	CS	19	400	37587	313	1551	1238	366	416	626	934	1246	0.2018	0.798	1.5558	3.955	0.5016	0.7536	0.2464	0.4039	0.8428	30.361	51.0092	0.0759	2.1049	0.4248	1.6801	0.8373	0.414	0.7982	0.4984	0.3978	0.4943	0.1966	0.246359	0.2464	148.701	313	63.1651	249.835	124.514	61.5506	1551	313	1238	617	305	0.4751
2022	06.22	CS	20	600	49475	351	1983	1632	415	470	726	1145	1655	0.177	0.823	2.1378	4.65	0.4865	0.799	0.201	0.337	0.7659	30.3157	47.7263	0.0505	1.9129	0.3386	1.5743	0.8084	0.316	0.823	0.5135	0.4226	0.3914	0.1654	0.200984	0.201	183.491	351	62.1286	288.871	148.33	58.0575	1983	351	1632	838	328	0.5228
2022	06.22	CS	20	700	52937	333	1915	1582	377	418	601	1017	1539	0.1739	0.826	3.2876	4.751	0.4324	0.7623	0.2377	0.2592	0.5647	33.462	43.7028	0.0478	1.581	0.2749	1.306	0.7414	0.31	0.8261	0.5676	0.4689	0.4187	0.1963	0.237654	0.2377	210.626	333	57.9055	275.094	156.154	65.3828	1915	333	1582	898	376	0.6325
2022	06.22	CS	20	800	49928	349	1656	1307	390	428	595	965	1312	0.2107	0.789	2.0756	3.745	0.4713	0.7368	0.2632	0.2907	0.6274	38.2004	50.8512	0.0478	1.6866	0.3555	1.3312	0.7038	0.35	0.7893	0.5287	0.4173	0.4978	0.2077	0.263187	0.2632	206.925	349	73.5513	275.449	145.627	72.4976	1656	349	1307	691	344	0.5929
2022	06.22	CS	20	700	53358	336	1680	1344	374	404	555	938	1342	0.2	0.8	2.7105	4	0.4479	0.7485	0.2515	0.2232	0.5432	39.7012	48.1426	0.0567	1.5158	0.3032	1.2126	0.6695	0.305	0.8	0.5521	0.4417	0.4555	0.2012	0.251482	0.2515	221.665	336	67.2	268.8	148.4	67.6	1680	336	1344	742	338	0.6597
2022	06.22	CS	20	700	51025	381	1709	1328	432	482	681	1045	1394	0.2229	0.777	1.4987	3.486	0.5	0.7628	0.2372	0.3765	0.753	38.4223	57.8648	0.0549	1.9381	0.4321	1.506	0.753	0.357	0.7771	0.5	0.3885	0.4744	0.1843	0.2372	0.2372	196.584	381	84.9391	296.061	148.03	70.2253	1709	381	1328	664	315	0.516
2022	06.22	CS	20	800	52018	349	1566	1217	385	420	575	935	1252	0.2229	0.777	1.8916	3.487	0.4815	0.742	0.258	0.2876	0.619	42.7427	54.948	0.0534	1.6542	0.3687	1.2856	0.6665	0.332	0.7771	0.5185	0.4029	0.4976	0.2005	0.258006	0.258	210.978	349	77.7784	271.222	140.625	69.9783	1566	349	1217	631	314	0.6045
2022	06.22	CS	20	700	45026	366	1567	1201	411	452	628	998	1303	0.2336	0.766	1.3655	3.281	0.5262	0.7802	0.2198	0.3414	0.7272	37.4907	51.8068	0.0536	1.803	0.4211	1.3819	0.6547	0.304	0.7664	0.4738	0.3631	0.464	0.1685	0.219843	0.2198	202.995	366	85.4856	280.514	132.9	61.6618	1567	366	1201	569	264	0.5546
2022	06.22	CS	20	700	46064	347	1752	1405	403	454	677	1061	1464	0.1981	0.802	1.6998	4.049	0.5082	0.795	0.205	0.363	0.7829	32.786	50.5107	0.0468	1.9211	0.3805	1.5406	0.7577	0.316	0.8019	0.4918	0.3944	0.4168	0.1644	0.204982	0.205	180.626	347	68.7266	278.273	136.859	57.0411	1752	347	1405	691	288	0.5205
2022	06.22	CS	20	700	48792	333	1702	1369	386	436	646	1023	1401	0.1957	0.804	1.7934	4.111	0.504	0.7801	0.2199	0.3652	0.7621	35.6409	53.8918	0.0509	1.8799	0.3678	1.5121	0.75	0.332	0.8043	0.496	0.3989	0.4433	0.1769	0.219877	0.2199	177.137	333	65.1522	267.848	132.848	58.8913	1702	333	1369	679	301	0.5319
2022	06.22	CS	21	900	91456	456	2017	1561	495	530	687	1071	1584	0.2261	0.774	2.7124	3.423	0.394	0.7226	0.2774	0.2242	0.4933	58.5879	73.354	0.0651	1.6178	0.3657	1.252	0.7588	0.347	0.7739	0.606	0.469	0.4577	0.2147	0.277366	0.2774	281.864	456	103.092	352.908	213.87	97.8919	2017	456	1561	946	433	0.6181
2022	06.22	CS	21	600	44373	367	2005	1638	421	468	687	1106	1669	0.183	0.817	2.5609	4.463	0.4512	0.7949	0.2051	0.2869	0.6512	27.0898	39.1012	0.0451	1.7668	0.3234	1.4434	0.7922	0.296	0.817	0.5488	0.4484	0.3737	0.1676	0.205087	0.2051	207.72	367	67.1766	299.823	164.555	61.5022	2005	367	1638	899	336	0.566
2022	06.22	CS	21	600	53607	395	2229	1834	446	491	706	1173	1847	0.1772	0.823	3.2429	4.643	0.4242	0.7917	0.2083	0.2454	0.5652	29.2296	38.9478	0.0487	1.6195	0.287	1.3325	0.7672	0.278	0.8228	0.5758	0.4738	0.3617	0.1714	0.208267	0.2083	243.902	395	69.9978	325.002	187.133	67.694	2229	395	1834	1056	382	0.6175
2022	06.22	CS	21	700	55262	404	1725	1321	438	460	596	940	1353	0.2342	0.766	2.5594	3.27	0.4058	0.7184	0.2816	0.1665	0.4845	41.8332	49.9501	0.0598	1.5592	0.3652	1.194	0.7095	0.336	0.7658	0.5942	0.4551	0.4739	0.2157	0.281591	0.2816	259.107	404	94.618	309.382	183.849	87.1235	1725	404	1321	785	372	0.6414
2022	06.22	CS	21	700	54952	383	1950	1567	428	466	658	1054	1583	0.1964	0.804	2.6781	4.091	0.4282	0.7658	0.2342	0.2425	0.585	35.0685	47.9078	0.0501	1.7	0.3339	1.3661	0.7811	0.32	0.8036	0.5718	0.4595	0.4096	0.1882	0.234209	0.2342	225.294	383	75.2251	307.775	175.984	72.0826	1950	383	1567	896	367	0.5882
2022	06.22	CS	21	700	52629	367	1687	1320	406	440	600	965	1352	0.2175	0.782	2.1802	3.597	0.453	0.7462	0.2538	0.2576	0.5884	39.8704	51.7826	0.057	1.6599	0.3611	1.2988	0.7104	0.33	0.7825	0.547	0.428	0.464	0.1986	0.253808	0.2538	221.098	367	79.8394	287.161	157.068	72.8779	1687	367	1320	722	335	0.6025
2022	06.22	CS	21	800	48698	377	1579	1202	409	437	568	866	1193	0.2388	0.761	2.2651	3.188	0.4068	0.6789	0.3211	0.2329	0.5297	40.5144	52.7487	0.0506	1.7103	0.4084	1.302	0.7723	0.418	0.7612	0.5932	0.4516	0.5414	0.2445	0.321158	0.3211	220.429	377	90.012	286.988	170.235	92.1609	1579	377	1202	713	386	0.5847
2022	06.22	CS	21	800	30452	373	1409	1036	434	493	699	907	1155	0.2647	0.735	0.7862	2.777	0.5154	0.7548	0.2452	0.5695	1.0489	29.394	59.8155	0.0367	2.7676	0.7327	2.035	0.9861	0.499	0.7353	0.4846	0.3563	0.506	0.1803	0.245208	0.2452	134.774	373	98.7431	274.257	132.893	67.2406	1409	373	1036	502	254	0.3613
2022	06.22	CS	21	900	67095	378	1751	1373	403	426	531	851	1285	0.2159	0.784	4.1885	3.632	0.3445	0.6606	0.3394	0.1675	0.3714	48.8677	52.6903	0.0543	1.3751	0.2968	1.0782	0.7068	0.366	0.7841	0.6555	0.514	0.5178	0.2661	0.339418	0.3394	274.889	378	81.6014	296.399	194.289	100.599	1751	378	1373	900	466	0.7272
2022	06.22	CS	22	800	53590	375	1799	1424	414	452	612	997	1419	0.2084	0.792	2.5429	3.797	0.4368	0.7331	0.2669	0.2669	0.5548	37.6336	47.7984	0.047	1.6046	0.3345	1.2701	0.7153	0.339	0.7916	0.5632	0.4458	0.4738	0.2112	0.266844	0.2669	233.703	375	78.1684	296.832	167.176	79.2107	1799	375	1424	802	380	0.6232
2022	06.22	CS	22	700	50360	365	1867	1502	404	443	612	1001	1490	0.1955	0.804	2.9018	4.115	0.4234	0.749	0.251	0.2597	0.5482	33.5284	43.4041	0.0479	1.6091	0.3146	1.2945	0.7464	0.325	0.8045	0.5766	0.4638	0.4353	0.2019	0.250994	0.251	226.835	365	71.3578	293.642	169.304	73.7038	1867	365	1502	866	377	0.6215
2022	06.22	CS	22	700	46935	365	1915	1550	419	466	680	1078	1559	0.1906	0.809	2.2833	4.247	0.46	0.7703	0.2297	0.3032	0.6774	30.2807	44.5929	0.0433	1.8194	0.3468	1.4727	0.7952	0.338	0.8094	0.54	0.4371	0.4253	0.1859	0.229662	0.2297	200.616	365	69.5692	295.431	159.533	67.8538	1915	365	1550	837	356	0.5496
2022	06.22	CS	22	700	43663	389	1642	1253	437	478	667	1033	1367	0.2369	0.763	1.3461	3.221	0.514	0.7805	0.2195	0.3272	0.7396	34.8468	50.1419	0.0498	1.8856	0.4467	1.4389	0.6994	0.316	0.7631	0.486	0.3709	0.4516	0.1675	0.219478	0.2195	206.3	389	92.1565	296.844	144.276	65.1492	1642	389	1253	609	275	0.5303
2022	06.22	CS	22	800	59665	392	1833	1441	432	457	625	1029	1459	0.2139	0.786	2.493	3.676	0.4421	0.7405	0.2595	0.1735	0.539	41.4055	50.4839	0.0518	1.5509	0.3317	1.2193	0.6803	0.316	0.7861	0.5579	0.4386	0.4652	0.204	0.259535	0.2595	252.756	392	83.832	308.168	171.941	79.9825	1833	392	1441	804	374	0.6448
2022	06.22	CS	22	800	45050	406	1622	1216	448	487	652	988	1328	0.2503	0.75	1.4467	2.995	0.4786	0.7582	0.2418	0.3207	0.6743	37.0475	52.1976	0.0463	1.8794	0.4704	1.4089	0.7346	0.341	0.7497	0.5214	0.3909	0.4637	0.1813	0.241773	0.2418	216.026	406	101.625	304.375	158.695	73.5906	1622	406	1216	634	294	0.5321
2022	06.22	CS	22	600	43141	310	1563	1253	344	376	528	909	1248	0.1983	0.802	2.4302	4.042	0.4781	0.7486	0.2514	0.2554	0.5799	34.4302	41.7685	0.0574	1.5133	0.3001	1.2131	0.6332	0.305	0.8017	0.5219	0.4184	0.4817	0.2015	0.251399	0.2514	204.85	310	61.4843	248.516	129.712	62.476	1563	310	1253	654	315	0.6608
2022	06.22	CS	22	800	53521	395	1717	1322	440	484	666	1016	1365	0.2301	0.77	1.6664	3.347	0.4697	0.7337	0.2663	0.3328	0.6833	40.485	58.8912	0.0506	1.8893	0.4346	1.4546	0.7713	0.387	0.7699	0.5303	0.4083	0.5021	0.205	0.266264	0.2663	209.072	395	90.8707	304.129	161.267	80.9785	1717	395	1322	701	352	0.5293
2022	06.22	CS	22	700	49538	381	1563	1182	419	454	611	962	1253	0.2438	0.756	1.5326	3.102	0.4915	0.7377	0.2623	0.2961	0.6486	41.9107	55.3038	0.0599	1.7449	0.4253	1.3196	0.6709	0.346	0.7562	0.5085	0.3845	0.5158	0.1983	0.262284	0.2623	218.351	381	92.8733	288.127	146.501	75.5662	1563	381	1182	601	310	0.5731
2022	06.22	CS	23	900	60496	388	1837	1449	416	443	561	918	1389	0.2112	0.789	3.9121	3.735	0.3658	0.6908	0.3092	0.1863	0.398	41.75	45.4261	0.0464	1.3794	0.2913	1.0881	0.6901	0.336	0.7888	0.6342	0.5003	0.4875	0.2439	0.309172	0.3092	281.282	388	81.951	306.049	194.106	94.6238	1837	388	1449	919	448	0.725
2022	06.22	CS	23	700	52094	389	1939	1550	432	468	640	1025	1534	0.2006	0.799	2.8997	3.985	0.4103	0.7387	0.2613	0.2323	0.5398	33.6088	44.2128	0.048	1.6457	0.3302	1.3155	0.7757	0.344	0.7994	0.5897	0.4714	0.4431	0.2089	0.261296	0.2613	236.374	389	78.0407	310.959	183.366	81.2506	1939	389	1550	914	405	0.6077
2022	06.22	CS	23	800	59822	397	1874	1477	430	459	591	949	1425	0.2118	0.788	3.4953	3.72	0.3737	0.696	0.304	0.1963	0.4378	40.5027	47.4488	0.0506	1.4864	0.3149	1.1715	0.7337	0.356	0.7882	0.6263	0.4936	0.4854	0.2396	0.304006	0.304	267.088	397	84.103	312.897	195.958	95.119	1874	397	1477	925	449	0.6728
2022	06.22	CS	23	600	51947	317	1799	1482	350	378	516	895	1413	0.1762	0.824	4.3738	4.675	0.39	0.7395	0.2605	0.1889	0.4476	35.0521	40.2271	0.0584	1.3931	0.2455	1.1476	0.7	0.299	0.8238	0.61	0.5025	0.427	0.2146	0.26047	0.2605	227.55	317	55.8583	261.142	159.293	68.0167	1799	317	1482	904	386	0.7178
2022	06.22	CS	23	600	51215	394	1973	1579	444	493	701	1089	1613	0.1997	0.8	2.3088	4.008	0.4402	0.772	0.228	0.3103	0.6481	32.4351	47.7582	0.0541	1.8398	0.3674	1.4724	0.8243	0.336	0.8003	0.5598	0.448	0.4072	0.1825	0.227951	0.228	214.154	394	78.6802	315.32	176.531	71.8905	1973	394	1579	884	360	0.5435
2022	06.22	CS	23	700	55710	376	1943	1567	422	461	645	1050	1568	0.1935	0.806	2.7894	4.168	0.4301	0.7607	0.2393	0.2489	0.5722	35.5522	47.2974	0.0508	1.6496	0.3192	1.3304	0.7581	0.318	0.8065	0.5699	0.4596	0.4199	0.193	0.239301	0.2393	227.934	376	72.7617	303.238	172.809	72.5682	1943	376	1567	893	375	0.6062
2022	06.22	CS	23	600	53220	382	2028	1646	431	473	672	1091	1666	0.1884	0.812	2.8249	4.309	0.4307	0.7801	0.2199	0.2552	0.5873	32.3332	44.0838	0.0539	1.6798	0.3164	1.3634	0.7761	0.3	0.8116	0.5693	0.462	0.3863	0.1785	0.219921	0.2199	227.408	382	71.9546	310.045	176.496	68.1874	2028	382	1646	937	362	0.5953
2022	06.22	CS	23	600	50301	404	2183	1779	462	512	753	1195	1838	0.1851	0.815	2.5397	4.403	0.4446	0.8061	0.1939	0.2811	0.6539	28.275	41.5843	0.0471	1.8047	0.334	1.4707	0.8168	0.285	0.8149	0.5554	0.4526	0.3492	0.158	0.193946	0.1939	223.86	404	74.7668	329.233	182.846	63.8479	2183	404	1779	988	345	0.5541
2022	06.22	CS	23	600	47701	379	2132	1753	443	497	747	1172	1802	0.1778	0.822	2.4803	4.625	0.4524	0.8118	0.1882	0.308	0.6998	27.211	42.0919	0.0454	1.8813	0.3344	1.5469	0.8471	0.291	0.8222	0.5476	0.4503	0.3437	0.1548	0.18821	0.1882	201.456	379	67.3738	311.626	170.657	58.6632	2132	379	1753	960	330	0.5315
2022	06.22	CS	24	600	48506	391	2055	1664	439	480	689	1116	1690	0.1903	0.81	2.7146	4.256	0.4357	0.7806	0.2194	0.2464	0.597	29.1504	39.9394	0.0486	1.6921	0.3219	1.3701	0.7732	0.301	0.8097	0.5643	0.4569	0.3887	0.1776	0.219343	0.2194	231.074	391	74.3946	316.605	178.661	69.4477	2055	391	1664	939	365	0.591
2022	06.22	CS	24	900	73895	421	1903	1482	459	491	643	978	1421	0.2212	0.779	2.8556	3.52	0.3758	0.6748	0.3252	0.2159	0.4993	49.8617	66.2436	0.0554	1.706	0.3774	1.3285	0.8292	0.432	0.7788	0.6242	0.4861	0.5211	0.2533	0.325271	0.3252	246.776	421	93.1377	327.862	204.637	106.633	1903	421	1482	925	482	0.5862
2022	06.22	CS	24	800	51899	392	1775	1383	429	465	627	1005	1410	0.2208	0.779	2.2518	3.528	0.4432	0.7361	0.2639	0.2603	0.5664	37.5264	47.9539	0.0469	1.6401	0.3622	1.2779	0.7115	0.337	0.7792	0.5568	0.4338	0.474	0.2056	0.263923	0.2639	239.01	392	86.5713	305.429	170.051	80.6085	1775	392	1383	770	365	0.6097
2022	06.22	CS	24	700	52712	388	1943	1555	436	479	681	1100	1579	0.1997	0.8	2.307	4.008	0.4579	0.7659	0.2341	0.2765	0.6281	33.8981	46.4988	0.0484	1.714	0.3423	1.3717	0.7436	0.321	0.8003	0.5421	0.4339	0.4318	0.1873	0.234079	0.2341	226.371	388	77.4802	310.52	168.34	72.6876	1943	388	1555	843	364	0.5834
2022	06.22	CS	24	270	31658	535	1755	1220	562	587	705	1045	1505	0.3048	0.695	1.6552	2.28	0.418	0.7951	0.2049	0.2049	0.4645	25.9491	28.8324	0.0961	1.5984	0.4872	1.1111	0.6466	0.228	0.6952	0.582	0.4046	0.3521	0.1425	0.204922	0.2049	334.71	535	163.091	371.909	216.439	76.2108	1755	535	1220	710	250	0.6256
2022	06.22	CS	24	600	48152	370	1864	1494	428	478	722	1117	1538	0.1985	0.802	1.717	4.038	0.5	0.7818	0.2182	0.3347	0.7854	32.23	50.6245	0.0537	1.9597	0.389	1.5707	0.7854	0.343	0.8015	0.5	0.4008	0.4364	0.1749	0.2182	0.2182	188.804	370	73.4442	296.556	148.278	64.7103	1864	370	1494	747	326	0.5103
2022	06.22	CS	24	700	51770	367	1806	1439	414	459	663	1050	1488	0.2032	0.797	1.9948	3.921	0.4746	0.779	0.221	0.3127	0.6857	35.9764	51.9718	0.0514	1.813	0.3684	1.4446	0.7589	0.319	0.7968	0.5254	0.4186	0.4206	0.1761	0.220983	0.221	202.427	367	74.5786	292.421	153.628	64.6213	1806	367	1439	756	318	0.5516
2022	06.22	CS	24	700	45523	364	1693	1329	413	453	649	1039	1390	0.215	0.785	1.6442	3.651	0.5079	0.772	0.228	0.301	0.7148	34.2534	48.2085	0.0489	1.7929	0.3855	1.4074	0.6926	0.321	0.785	0.4921	0.3863	0.4633	0.179	0.22799	0.228	203.023	364	78.2611	285.739	140.612	65.1459	1693	364	1329	654	303	0.5578
2022	06.22	CS	24	658.75	50514.4	403.5	1849.25	1445.75	447.5	486.5	672.375	1056.25	1502.62	0.219188	0.780875	2.14253	3.65025	0.451638	0.760663	0.239338	0.26905	0.61765	34.8557	47.5341	0.056175	1.73952	0.379238	1.36025	0.742625	0.32525	0.780813	0.548362	0.427625	0.436	0.187037	0.239339	0.239338	234.024	403.5	90.1199	313.38	172.581	75.0081	1849.25	403.5	1445.75	793	346.625	0.57695
2022	06.22	AS	25	700	48312	384	1883	1499	430	475	670	1062	1549	0.2039	0.796	2.2302	3.904	0.4523	0.7772	0.2228	0.3002	0.636	32.2293	45.3175	0.046	1.7663	0.3602	1.4061	0.7701	0.313	0.7961	0.5477	0.436	0.4068	0.1774	0.222804	0.2228	217.404	384	78.3091	305.691	167.426	68.1126	1883	384	1499	821	334	0.5662
2022	06.22	AS	25	600	42497	402	1693	1291	464	520	749	1062	1416	0.2374	0.763	1.1133	3.211	0.5112	0.7854	0.2146	0.4338	0.8959	32.9181	57.6898	0.0549	2.2982	0.5457	1.7525	0.8566	0.376	0.7626	0.4888	0.3727	0.439	0.1636	0.214583	0.2146	174.92	402	95.4542	306.546	149.83	65.7732	1693	402	1291	631	277	0.4351
2022	06.22	AS	25	600	46704	414	2023	1609	489	554	833	1220	1708	0.2046	0.795	1.481	3.886	0.5009	0.8042	0.1958	0.404	0.868	29.0269	50.2989	0.0484	2.1787	0.4459	1.7328	0.8648	0.339	0.7954	0.4991	0.3969	0.3923	0.1557	0.195797	0.1958	190.022	414	84.7237	329.276	164.331	64.4637	2023	414	1609	803	315	0.459
2022	06.22	AS	25	700	28462	447	1349	902	490	533	694	941	1106	0.3314	0.669	0.5572	2.018	0.5477	0.7306	0.2694	0.4767	0.9128	31.5539	52.5899	0.0451	2.4926	0.8259	1.6667	0.7539	0.449	0.6686	0.4523	0.3024	0.5956	0.1801	0.26939	0.2694	179.331	447	148.116	298.884	135.194	80.5196	1349	447	902	408	243	0.4012
2022	06.22	AS	25	500	25959	447	1493	1046	495	538	716	987	1222	0.2994	0.701	0.771	2.34	0.5163	0.7409	0.2591	0.4111	0.8572	24.8177	41.2096	0.0496	2.3701	0.7096	1.6605	0.8033	0.43	0.7006	0.4837	0.3389	0.5356	0.1815	0.25907	0.2591	188.6	447	133.831	313.17	151.495	81.1366	1493	447	1046	506	271	0.4219
2022	06.22	AS	25	800	40806	369	1488	1119	403	437	571	845	1122	0.248	0.752	1.8148	3.033	0.4254	0.6729	0.3271	0.3038	0.6017	36.4664	51.5842	0.0456	1.881	0.4665	1.4146	0.8128	0.463	0.752	0.5746	0.4321	0.5692	0.246	0.327062	0.3271	196.172	369	91.506	277.494	159.454	90.7621	1488	369	1119	643	366	0.5316
2022	06.22	AS	25	400	21556	317	1308	991	354	388	537	834	1153	0.2424	0.758	1.2758	3.126	0.5217	0.8436	0.1564	0.3431	0.74	21.752	30.8539	0.0544	1.8722	0.4537	1.4184	0.6784	0.222	0.7576	0.4783	0.3624	0.327	0.1185	0.156404	0.1564	169.32	317	76.8265	240.173	114.876	37.565	1308	317	991	474	155	0.5341
2022	06.22	AS	25	700	30219	300	1271	971	345	387	564	853	1035	0.236	0.764	0.9788	3.237	0.5695	0.757	0.243	0.4325	0.9063	31.1215	49.5243	0.0445	2.083	0.4917	1.5913	0.685	0.387	0.764	0.4305	0.3289	0.5646	0.1857	0.24306	0.243	144.023	300	70.8104	229.19	98.6625	55.7042	1271	300	971	418	236	0.4801
2022	06.22	AS	25	800	56126	348	1713	1365	382	413	556	920	1337	0.2032	0.797	2.9791	3.922	0.419	0.7245	0.2755	0.2271	0.5079	41.1182	49.8403	0.0514	1.5211	0.309	1.2121	0.7042	0.334	0.7968	0.581	0.4629	0.4741	0.2195	0.275452	0.2755	228.782	348	70.697	277.303	161.1	76.3853	1713	348	1365	793	376	0.6574
2022	06.22	AS	26	700	51196	345	1939	1594	397	447	662	1078	1586	0.1779	0.822	2.5791	4.62	0.4598	0.7785	0.2215	0.3137	0.6629	32.1181	46.3003	0.0459	1.7536	0.312	1.4416	0.7787	0.319	0.8221	0.5402	0.444	0.41	0.1821	0.221482	0.2215	196.738	345	61.3847	283.615	153.195	62.8081	1939	345	1594	861	353	0.5703
2022	06.22	AS	26	800	49418	337	1651	1314	374	413	573	942	1318	0.2041	0.796	2.3307	3.899	0.4604	0.7466	0.2534	0.2968	0.5987	37.6087	48.9017	0.047	1.6338	0.3335	1.3003	0.7016	0.33	0.7959	0.5396	0.4294	0.4697	0.2017	0.25345	0.2534	206.268	337	68.788	268.212	144.72	67.9715	1651	337	1314	709	333	0.6121
2022	06.22	AS	26	800	48164	360	1467	1107	400	436	588	902	1181	0.2454	0.755	1.4375	3.075	0.4896	0.7416	0.2584	0.3252	0.6865	43.5084	61.0081	0.0544	1.8582	0.456	1.4022	0.7157	0.362	0.7546	0.5104	0.3851	0.5062	0.195	0.258364	0.2584	193.736	360	88.3436	271.656	138.65	70.184	1467	360	1107	565	286	0.5381
2022	06.22	AS	26	900	45456	575	1668	1093	610	643	784	1071	1339	0.3447	0.655	0.8895	1.901	0.4538	0.699	0.301	0.3019	0.6374	41.5881	58.4135	0.0462	2.1435	0.7389	1.4046	0.7672	0.423	0.6553	0.5462	0.3579	0.5511	0.1972	0.301011	0.301	268.253	575	198.216	376.784	205.8	113.414	1668	575	1093	597	329	0.4665
2022	06.22	AS	26	800	44076	378	1477	1099	422	462	634	944	1213	0.2559	0.744	1.126	2.907	0.515	0.7598	0.2402	0.364	0.7765	40.1054	60.4651	0.0501	2.0262	0.5186	1.5077	0.7312	0.362	0.7441	0.485	0.3609	0.4953	0.1787	0.240221	0.2402	186.556	378	96.7393	281.261	136.408	67.564	1477	378	1099	533	264	0.4935
2022	06.22	AS	26	900	35571	318	1392	1074	347	372	467	696	1217	0.2284	0.772	3.043	3.377	0.352	0.8371	0.1629	0.2328	0.4624	33.1199	43.5174	0.0368	1.703	0.389	1.3139	0.8515	0.214	0.7716	0.648	0.5	0.2514	0.1257	0.162907	0.1629	186.729	318	72.6466	245.353	159	39.9784	1392	318	1074	696	175	0.5872
2022	06.22	AS	26	800	43047	311	1436	1125	358	402	580	891	1139	0.2166	0.783	1.4354	3.617	0.5156	0.736	0.264	0.3911	0.797	38.2642	59.1555	0.0478	1.9734	0.4274	1.546	0.7489	0.408	0.7834	0.4844	0.3795	0.545	0.2068	0.263998	0.264	157.596	311	67.3545	243.645	118.033	64.3224	1436	311	1125	545	297	0.5068
2022	06.22	AS	26	900	56958	316	1573	1257	352	381	528	892	1225	0.2009	0.799	2.5527	3.978	0.4582	0.7232	0.2768	0.2307	0.5622	45.3127	55.592	0.0503	1.5353	0.3084	1.2269	0.6647	0.34	0.7991	0.5418	0.4329	0.511	0.2212	0.27686	0.2768	205.823	316	63.4812	252.519	136.806	69.9097	1573	316	1257	681	348	0.6514
2022	06.22	AS	26	700	45332	305	1642	1337	358	405	625	996	1328	0.1857	0.814	1.8014	4.384	0.5168	0.7651	0.2349	0.3515	0.7978	33.9054	52.3383	0.0484	1.8958	0.3521	1.5437	0.7459	0.363	0.8143	0.4832	0.3934	0.4861	0.1912	0.234884	0.2349	160.882	305	56.6535	248.346	119.994	58.3252	1642	305	1337	646	314	0.5275
2022	06.22	AS	27	900	80699	487	1942	1455	524	552	703	1072	1527	0.2508	0.749	2.254	2.988	0.4021	0.7148	0.2852	0.1924	0.4948	55.4634	68.2626	0.0616	1.6427	0.4119	1.2308	0.7359	0.351	0.7492	0.5979	0.448	0.477	0.2137	0.285198	0.2852	296.463	487	122.126	364.874	218.172	104.07	1942	487	1455	870	415	0.6087
2022	06.22	AS	27	900	46660	441	1819	1378	484	521	693	1061	1481	0.2424	0.758	1.7801	3.125	0.4499	0.7547	0.2453	0.2685	0.6096	33.861	45.8762	0.0376	1.7884	0.4336	1.3548	0.7453	0.332	0.7576	0.5501	0.4167	0.4459	0.1858	0.24529	0.2453	246.589	441	106.916	334.084	183.77	81.945	1819	441	1378	758	338	0.5592
2022	06.22	AS	27	800	34081	477	1724	1247	526	568	749	1042	1404	0.2767	0.723	1.1853	2.614	0.4531	0.7434	0.2566	0.3368	0.7271	27.3307	43.8582	0.0342	2.2186	0.6138	1.6047	0.8776	0.412	0.7233	0.5469	0.3956	0.4692	0.1856	0.256605	0.2566	215	477	131.977	345.023	188.697	88.5383	1724	477	1247	682	320	0.4507
2022	06.22	AS	27	700	44880	523	1892	1369	576	628	832	1167	1580	0.2764	0.724	1.111	2.618	0.4704	0.7721	0.2279	0.3798	0.7524	32.7828	52.4322	0.0468	2.2104	0.611	1.5994	0.847	0.365	0.7236	0.5296	0.3832	0.4303	0.1649	0.227887	0.2279	236.609	523	144.571	378.429	200.41	86.2452	1892	523	1369	725	312	0.4524
2022	06.22	AS	27	600	41691	437	1654	1217	478	514	678	1036	1362	0.2642	0.736	1.3136	2.785	0.4922	0.7601	0.2399	0.2958	0.6601	34.2569	45.9428	0.0571	1.8227	0.4816	1.3411	0.681	0.322	0.7358	0.5078	0.3736	0.4725	0.1765	0.239935	0.2399	239.754	437	115.459	321.541	163.28	77.1487	1654	437	1217	618	292	0.5486
2022	06.22	AS	27	800	46289	412	1559	1147	451	488	648	971	1264	0.2643	0.736	1.2758	2.784	0.4874	0.7428	0.2572	0.3226	0.6858	40.3569	56.7933	0.0504	1.9128	0.5055	1.4073	0.7214	0.362	0.7357	0.5126	0.3772	0.5017	0.1892	0.257171	0.2572	215.391	412	108.88	303.12	155.392	77.9602	1559	412	1147	588	295	0.5228
2022	06.22	AS	27	900	87215	387	1702	1315	440	488	684	982	1293	0.2274	0.773	1.5911	3.398	0.4525	0.689	0.311	0.365	0.7529	66.3229	110.352	0.0737	2.1535	0.4897	1.6639	0.911	0.518	0.7726	0.5475	0.423	0.5681	0.2403	0.311035	0.311	179.707	387	87.9959	299.004	163.713	92.9982	1702	387	1315	720	409	0.4644
2022	06.22	AS	27	600	34495	327	1404	1077	373	416	607	909	1143	0.2329	0.767	1.1166	3.294	0.5404	0.7577	0.2423	0.3993	0.8666	32.0286	51.3632	0.0534	2.0906	0.4869	1.6037	0.7371	0.389	0.7671	0.4596	0.3526	0.5273	0.1859	0.242347	0.2423	156.414	327	76.1603	250.84	115.288	60.7885	1404	327	1077	495	261	0.4783
2022	06.22	AS	27	800	51209	332	1593	1261	368	403	557	897	1249	0.2084	0.792	2.3251	3.798	0.4481	0.7272	0.2728	0.2776	0.5948	40.6099	53.907	0.0508	1.6769	0.3495	1.3274	0.7327	0.362	0.7916	0.5519	0.4369	0.4943	0.2159	0.272804	0.2728	197.984	332	69.1927	262.807	145.055	71.6937	1593	332	1261	696	344	0.5963
2022	06.22	AS	28	600	25685	363	1387	1024	425	479	705	978	1187	0.2617	0.738	0.6227	2.821	0.6006	0.8047	0.1953	0.5273	1.1133	25.083	46.4953	0.0418	2.5108	0.6571	1.8537	0.7404	0.362	0.7383	0.3994	0.2949	0.489	0.1442	0.195307	0.1953	144.575	363	95.0029	267.997	107.042	52.3432	1387	363	1024	409	200	0.3983
2022	06.22	AS	28	300	36223	341	1741	1400	390	433	636	1034	1451	0.1959	0.804	1.9781	4.106	0.495	0.7929	0.2071	0.3071	0.7024	25.8736	36.7134	0.0862	1.7646	0.3456	1.419	0.7166	0.294	0.8041	0.505	0.4061	0.4102	0.1666	0.207151	0.2071	193.245	341	66.7898	274.21	138.476	56.8007	1741	341	1400	707	290	0.5667
2022	06.22	AS	28	700	44291	372	1693	1321	417	458	644	1010	1392	0.2197	0.78	1.7394	3.551	0.483	0.7721	0.2279	0.3104	0.6863	33.5286	47.6478	0.0479	1.8213	0.4002	1.4211	0.7348	0.324	0.7803	0.517	0.4034	0.4407	0.1778	0.227842	0.2279	204.25	372	81.7389	290.261	150.074	66.1382	1693	372	1321	683	301	0.5491
2022	06.22	AS	28	700	45393	425	1670	1245	477	520	704	993	1377	0.2545	0.746	1.3248	2.929	0.4562	0.7647	0.2353	0.3454	0.747	36.4606	59.6978	0.0521	2.1962	0.5589	1.6373	0.8903	0.385	0.7455	0.5438	0.4054	0.4328	0.1754	0.235357	0.2353	193.516	425	108.159	316.841	172.29	74.5659	1670	425	1245	677	293	0.4553
2022	06.22	AS	28	700	45559	363	1684	1321	419	474	705	1061	1376	0.2156	0.784	1.3	3.639	0.5284	0.7668	0.2332	0.4164	0.863	34.4879	56.327	0.0493	2.082	0.4488	1.6332	0.7703	0.381	0.7844	0.4716	0.37	0.4944	0.1829	0.233159	0.2332	174.352	363	78.2476	284.752	134.293	66.3919	1684	363	1321	623	308	0.4803
2022	06.22	AS	28	600	38061	373	1561	1188	426	473	683	1035	1313	0.2389	0.761	1.0282	3.185	0.5572	0.7912	0.2088	0.3956	0.8698	32.0381	50.0092	0.0534	2.051	0.4901	1.5609	0.6911	0.326	0.7611	0.4428	0.337	0.4715	0.1589	0.20878	0.2088	181.863	373	89.1281	283.872	125.687	59.2594	1561	373	1188	526	248	0.4876
2022	06.22	AS	28	700	44882	351	1687	1336	414	469	704	1022	1399	0.2081	0.792	1.4196	3.806	0.5022	0.7844	0.2156	0.4117	0.8807	33.5943	58.9109	0.048	2.2143	0.4607	1.7536	0.8729	0.378	0.7919	0.4978	0.3942	0.4331	0.1707	0.215597	0.2156	158.515	351	73.0296	277.97	138.361	59.9218	1687	351	1336	665	288	0.4516
2022	06.22	AS	28	800	41841	354	1433	1079	392	428	586	925	1174	0.247	0.753	1.2563	3.048	0.5292	0.76	0.24	0.3336	0.7167	38.7773	52.5181	0.0485	1.7987	0.4443	1.3543	0.6376	0.325	0.753	0.4708	0.3545	0.5098	0.1807	0.240014	0.24	196.809	354	87.4501	266.55	125.493	63.9819	1433	354	1079	508	259	0.556
2022	06.22	AS	28	800	44570	369	1607	1238	417	451	639	946	1289	0.2296	0.77	1.5819	3.355	0.4661	0.7431	0.2569	0.2746	0.727	36.0014	56.1547	0.045	2.0247	0.4649	1.5598	0.8328	0.401	0.7704	0.5339	0.4113	0.4811	0.1979	0.256859	0.2569	182.249	369	84.7299	284.27	151.779	73.0193	1607	369	1238	661	318	0.4939
2022	06.22	AS	29	700	44847	373	1816	1443	421	461	654	1043	1461	0.2054	0.795	2.1141	3.869	0.4643	0.754	0.246	0.2772	0.6491	31.0792	43.4491	0.0444	1.7594	0.3614	1.398	0.7489	0.344	0.7946	0.5357	0.4257	0.4592	0.1955	0.245993	0.246	212.004	373	76.6129	296.387	158.772	72.9157	1816	373	1443	773	355	0.5684
2022	06.22	AS	29	700	40567	382	1725	1343	433	479	690	1061	1400	0.2214	0.779	1.4752	3.516	0.5056	0.758	0.242	0.3425	0.7645	30.2063	45.6728	0.0432	1.9421	0.4301	1.512	0.7476	0.366	0.7786	0.4944	0.3849	0.4895	0.1884	0.242009	0.242	196.694	382	84.5936	297.406	147.042	71.971	1725	382	1343	664	325	0.5149
2022	06.22	AS	29	700	49900	413	1908	1495	460	503	686	1026	1547	0.2165	0.784	2.2909	3.62	0.41	0.7585	0.2415	0.2876	0.6087	33.3776	49.5491	0.0477	1.8946	0.4101	1.4845	0.8758	0.358	0.7835	0.59	0.4623	0.4093	0.1892	0.241487	0.2415	217.988	413	89.3968	323.603	190.915	78.141	1908	413	1495	882	361	0.5278
2022	06.22	AS	29	700	46489	468	1642	1174	503	537	676	969	1301	0.285	0.715	1.4508	2.509	0.4267	0.7095	0.2905	0.2896	0.5906	39.5991	54.8012	0.0566	1.9356	0.5517	1.3839	0.7933	0.402	0.715	0.5733	0.4099	0.5067	0.2077	0.290491	0.2905	241.785	468	133.389	334.611	191.817	97.1912	1642	468	1174	673	341	0.5166
2022	06.22	AS	29	900	46491	415	1529	1114	460	501	673	962	1240	0.2714	0.729	1.0745	2.684	0.491	0.7406	0.2594	0.368	0.772	41.7332	65.6135	0.0464	2.1579	0.5857	1.5722	0.8002	0.408	0.7286	0.509	0.3708	0.5097	0.189	0.259437	0.2594	192.317	415	112.639	302.361	153.895	78.4402	1529	415	1114	567	289	0.4634
2022	06.22	AS	29	600	50019	406	1800	1394	468	524	757	1075	1468	0.2256	0.774	1.3731	3.433	0.4799	0.7618	0.2382	0.4017	0.8393	35.8818	62.7528	0.0598	2.2582	0.5094	1.7489	0.9096	0.417	0.7744	0.5201	0.4028	0.4579	0.1844	0.238154	0.2382	179.789	406	91.5756	314.424	163.528	74.8844	1800	406	1394	725	332	0.4428
2022	06.22	AS	29	700	43019	379	1651	1272	442	493	717	1020	1338	0.2296	0.77	1.2068	3.356	0.5039	0.7539	0.2461	0.4009	0.8857	33.8202	59.4447	0.0483	2.2814	0.5237	1.7577	0.8719	0.433	0.7704	0.4961	0.3822	0.496	0.1896	0.246066	0.2461	166.126	379	87.0024	291.998	144.851	71.8516	1651	379	1272	631	313	0.4383
2022	06.22	AS	29	300	33305	332	1683	1351	391	444	679	1012	1410	0.1973	0.803	1.5791	4.069	0.5033	0.7979	0.2021	0.3923	0.8562	24.6518	41.9322	0.0822	2.119	0.418	1.701	0.8448	0.344	0.8027	0.4967	0.3987	0.4069	0.1622	0.202107	0.2021	156.678	332	65.4926	266.507	132.366	53.8538	1683	332	1351	671	273	0.4719
2022	06.22	AS	29	900	62716	357	1539	1182	399	439	609	954	1197	0.232	0.768	1.4758	3.311	0.5051	0.7107	0.2893	0.3384	0.7107	53.0589	74.6558	0.059	1.832	0.425	1.407	0.6964	0.407	0.768	0.4949	0.3801	0.5846	0.2222	0.289319	0.2893	194.869	357	82.8129	274.187	135.702	79.3333	1539	357	1182	585	342	0.5459
2022	06.22	AS	30	700	48046	379	1786	1407	421	459	632	1025	1412	0.2122	0.788	2.1992	3.712	0.4591	0.7342	0.2658	0.2701	0.5994	34.148	44.5792	0.0488	1.6571	0.3517	1.3055	0.7061	0.347	0.7878	0.5409	0.4261	0.4915	0.2094	0.265852	0.2658	228.713	379	80.4261	298.574	161.489	79.3651	1786	379	1407	761	374	0.6035
2022	06.22	AS	30	800	41045	385	1600	1215	436	479	666	989	1307	0.2406	0.759	1.3027	3.156	0.4971	0.7588	0.2412	0.3539	0.7709	33.7822	52.3885	0.0422	2.0422	0.4914	1.5508	0.7799	0.374	0.7594	0.5029	0.3819	0.4795	0.1831	0.241141	0.2412	188.522	385	92.6406	292.359	147.022	70.5031	1600	385	1215	611	293	0.4897
2022	06.22	AS	30	600	30821	383	1708	1325	450	508	755	1070	1402	0.2242	0.776	1.1507	3.46	0.5185	0.7691	0.2309	0.4377	0.9358	23.261	41.985	0.0388	2.3267	0.5217	1.8049	0.8691	0.417	0.7758	0.4815	0.3735	0.4796	0.1792	0.230927	0.2309	164.611	383	85.8835	297.116	143.064	68.6171	1708	383	1325	638	306	0.4298
2022	06.22	AS	30	700	45431	380	1550	1170	415	448	591	945	1245	0.2452	0.755	1.666	3.079	0.4829	0.7393	0.2607	0.2821	0.6011	38.8303	48.3374	0.0555	1.6491	0.4043	1.2448	0.6437	0.325	0.7548	0.5171	0.3903	0.5041	0.1968	0.26067	0.2607	230.429	380	93.1613	286.839	148.323	74.7742	1550	380	1170	605	305	0.6064
2022	06.22	AS	30	800	38869	395	1441	1046	435	472	631	951	1193	0.2741	0.726	0.9978	2.648	0.5315	0.7629	0.2371	0.3537	0.7521	37.1592	52.5753	0.0464	1.9492	0.5343	1.4149	0.6628	0.335	0.7259	0.4685	0.34	0.5061	0.1721	0.237108	0.2371	202.647	395	108.275	286.724	134.316	67.9806	1441	395	1046	490	248	0.513
2022	06.22	AS	30	800	39481	334	1354	1020	369	401	550	894	1109	0.2467	0.753	1.2248	3.054	0.549	0.7598	0.2402	0.3137	0.7059	38.7072	49.7665	0.0484	1.7067	0.421	1.2857	0.5798	0.309	0.7533	0.451	0.3397	0.5326	0.1809	0.240203	0.2402	195.699	334	82.39	251.61	113.471	60.4357	1354	334	1020	460	245	0.5859
2022	06.22	AS	30	700	60028	364	1976	1612	405	437	603	1012	1550	0.1842	0.816	3.643	4.429	0.402	0.7357	0.2643	0.1985	0.4942	37.238	45.7813	0.0532	1.507	0.2776	1.2294	0.7352	0.325	0.8158	0.598	0.4879	0.4419	0.2156	0.264256	0.2643	241.539	364	67.0526	296.947	177.579	78.4737	1976	364	1612	964	426	0.6636
2022	06.22	AS	30	800	62202	397	1889	1492	432	467	604	933	1502	0.2102	0.79	3.4272	3.758	0.3592	0.7406	0.2594	0.2346	0.4625	41.6904	53.6686	0.0521	1.6298	0.3425	1.2873	0.8248	0.334	0.7898	0.6408	0.5061	0.4048	0.2049	0.259396	0.2594	243.588	397	83.4352	313.565	200.917	81.3335	1889	397	1492	956	387	0.6136
2022	06.22	AS	30	290	38083	344	1999	1655	405	459	701	1103	1693	0.1721	0.828	2.4992	4.811	0.4586	0.8151	0.1849	0.3263	0.719	23.0111	36.078	0.0793	1.8937	0.3259	1.5679	0.8488	0.29	0.8279	0.5414	0.4482	0.3415	0.1531	0.184888	0.1849	181.655	344	59.1976	284.802	154.189	52.6583	1999	344	1655	896	306	0.5281
2022	06.22	AS	31	600	38411	409	1903	1494	477	540	786	1139	1583	0.2149	0.785	1.4529	3.653	0.4886	0.7858	0.2142	0.4217	0.8411	25.7103	44.2592	0.0429	2.1927	0.4713	1.7215	0.8803	0.369	0.7851	0.5114	0.4015	0.4188	0.1682	0.214174	0.2142	186.528	409	87.9038	321.096	164.202	68.7756	1903	409	1494	764	320	0.4561
2022	06.22	AS	31	290	29741	348	1693	1345	416	479	741	1049	1413	0.2056	0.794	1.2579	3.865	0.5212	0.7918	0.2082	0.4684	0.974	22.1121	41.3222	0.0762	2.3523	0.4835	1.8688	0.8948	0.389	0.7944	0.4788	0.3804	0.4348	0.1654	0.208182	0.2082	147.94	348	71.5322	276.468	132.376	57.5546	1693	348	1345	644	280	0.4251
2022	06.22	AS	31	700	47502	405	1903	1498	448	488	669	1059	1521	0.2128	0.787	2.3271	3.699	0.4366	0.745	0.255	0.267	0.5874	31.7104	42.6685	0.0453	1.7094	0.3638	1.3456	0.7581	0.343	0.7872	0.5634	0.4435	0.4526	0.2007	0.254995	0.255	236.925	405	86.1929	318.807	179.622	81.298	1903	405	1498	844	382	0.585
2022	06.22	AS	31	600	36892	377	1686	1309	432	474	685	1039	1376	0.2236	0.776	1.4157	3.472	0.5057	0.7632	0.2368	0.3209	0.7843	28.1832	43.708	0.047	1.9975	0.4467	1.5509	0.7665	0.367	0.7764	0.4943	0.3837	0.4791	0.1839	0.236819	0.2368	188.736	377	84.2995	292.7	144.673	69.3179	1686	377	1309	647	310	0.5006
2022	06.22	AS	31	800	62689	382	1922	1540	414	445	595	1026	1492	0.1988	0.801	3.397	4.031	0.4182	0.7208	0.2792	0.2013	0.461	40.7071	44.8789	0.0509	1.376	0.2735	1.1025	0.6414	0.308	0.8012	0.5818	0.4662	0.4799	0.2237	0.279206	0.2792	277.616	382	75.923	306.077	178.081	85.4631	1922	382	1540	896	430	0.7268
2022	06.22	AS	31	700	57528	434	1918	1484	476	515	691	1080	1524	0.2263	0.774	2.1567	3.419	0.4353	0.7345	0.2655	0.2628	0.5773	38.7657	51.4076	0.0554	1.7139	0.3878	1.3261	0.7488	0.352	0.7737	0.5647	0.4369	0.4702	0.2054	0.265522	0.2655	253.224	434	98.2044	335.796	189.62	89.1533	1918	434	1484	838	394	0.5835
2022	06.22	AS	31	900	55328	441	1771	1330	486	528	682	945	1387	0.249	0.751	1.9407	3.016	0.3789	0.7113	0.2887	0.3158	0.604	41.6003	66.3074	0.0462	2.1224	0.5285	1.5939	0.9899	0.46	0.751	0.6211	0.4664	0.4649	0.2168	0.288749	0.2887	207.784	441	109.814	331.186	205.684	95.6206	1771	441	1330	826	384	0.4712
2022	06.22	AS	31	700	54419	411	1972	1561	461	510	709	1100	1594	0.2084	0.792	2.1994	3.798	0.4414	0.7578	0.2422	0.3139	0.6363	34.8619	50.2605	0.0498	1.8213	0.3796	1.4417	0.8054	0.349	0.7916	0.5586	0.4422	0.4335	0.1917	0.242153	0.2422	225.663	411	85.6597	325.34	181.74	78.7819	1972	411	1561	872	378	0.5491
2022	06.22	AS	31	600	51879	401	1919	1518	457	504	722	1101	1537	0.209	0.791	1.9077	3.786	0.4611	0.7484	0.2516	0.3096	0.7049	34.176	52.2404	0.057	1.9324	0.4038	1.5286	0.8237	0.385	0.791	0.5389	0.4263	0.467	0.1991	0.251666	0.2516	207.514	401	83.7942	317.206	170.932	79.8239	1919	401	1518	818	382	0.5175
2022	06.22	AS	32	600	35951	444	1837	1393	507	564	808	1141	1538	0.2417	0.758	1.1373	3.137	0.5004	0.7854	0.2146	0.4092	0.871	25.8083	44.9269	0.043	2.2956	0.5549	1.7408	0.8698	0.374	0.7583	0.4996	0.3789	0.4296	0.1628	0.214628	0.2146	193.413	444	107.314	336.686	168.222	72.2678	1837	444	1393	696	299	0.4356
2022	06.22	AS	32	700	38553	352	1520	1168	398	441	627	959	1227	0.2316	0.768	1.3004	3.318	0.5197	0.7491	0.2509	0.3682	0.7848	33.0073	49.8463	0.0472	1.9653	0.4551	1.5102	0.7253	0.379	0.7684	0.4803	0.3691	0.5223	0.1928	0.250861	0.2509	179.108	352	81.5158	270.484	129.916	67.8526	1520	352	1168	561	293	0.5088
2022	06.22	AS	32	800	36766	352	1437	1085	401	445	631	918	1180	0.245	0.755	1.0823	3.082	0.5217	0.7631	0.2369	0.4055	0.8571	33.8862	55.6787	0.0424	2.1762	0.5331	1.6431	0.786	0.389	0.755	0.4783	0.3612	0.4952	0.1788	0.236854	0.2369	161.75	352	86.2241	265.776	127.132	62.9534	1437	352	1085	519	257	0.4595
2022	06.22	AS	32	700	43669	373	1725	1352	427	475	689	1047	1405	0.2162	0.784	1.5238	3.625	0.4985	0.7633	0.2367	0.355	0.7791	32.2997	50.4783	0.0461	1.994	0.4312	1.5628	0.7837	0.37	0.7838	0.5015	0.393	0.472	0.1855	0.236708	0.2367	187.061	373	80.6545	292.346	146.605	69.1942	1725	373	1352	678	320	0.5015
2022	06.22	AS	32	700	38782	405	1698	1293	467	523	755	1081	1415	0.2385	0.761	1.0714	3.193	0.5228	0.7811	0.2189	0.4331	0.9023	29.9936	51.7642	0.0428	2.2664	0.5406	1.7258	0.8235	0.378	0.7615	0.4772	0.3634	0.4587	0.1667	0.218892	0.2189	178.697	405	96.5989	308.401	147.164	67.5	1698	405	1293	617	283	0.4412
2022	06.22	AS	32	800	31397	355	1419	1064	410	461	665	912	1170	0.2502	0.75	0.9189	2.997	0.5235	0.766	0.234	0.4793	0.9712	29.5081	54.7427	0.0369	2.4741	0.619	1.8552	0.884	0.434	0.7498	0.4765	0.3573	0.4911	0.1755	0.234009	0.234	143.487	355	88.8125	266.188	126.839	62.2939	1419	355	1064	507	249	0.4042
2022	06.22	AS	32	600	35479	417	1641	1224	483	546	779	997	1360	0.2541	0.746	0.9737	2.935	0.4739	0.7704	0.2296	0.5147	0.9858	28.9858	60.3038	0.0483	2.7892	0.7088	2.0805	1.0946	0.478	0.7459	0.5261	0.3924	0.4363	0.1712	0.229537	0.2296	149.505	417	105.965	311.035	163.649	71.4059	1641	417	1224	644	281	0.3585
2022	06.22	AS	32	700	37258	414	1637	1223	468	521	730	1028	1346	0.2529	0.747	1.0633	2.954	0.502	0.7621	0.2379	0.4334	0.8613	30.4643	52.2623	0.0435	2.2963	0.5807	1.7155	0.8543	0.408	0.7471	0.498	0.372	0.4778	0.1778	0.237944	0.2379	180.29	414	104.701	309.299	154.017	73.5944	1637	414	1223	609	291	0.4355
2022	06.22	AS	32	700	30791	322	1306	984	377	433	619	847	1072	0.2466	0.753	0.8896	3.056	0.5335	0.7622	0.2378	0.5691	1.0061	31.2921	59.0079	0.0447	2.5028	0.6171	1.8857	0.8796	0.448	0.7534	0.4665	0.3515	0.5098	0.1792	0.237822	0.2378	128.656	322	79.3905	242.609	113.168	57.6937	1306	322	984	459	234	0.3996
2022	08.22	SS	1	700	61872	333	1804	1471	363	389	528	912	1467	0.1846	0.815	4.1192	4.417	0.3936	0.7709	0.2291	0.1768	0.4419	42.1004	47.263	0.0601	1.3768	0.2541	1.1226	0.6807	0.257	0.8154	0.6064	0.4945	0.3778	0.1868	0.229098	0.2291	241.865	333	61.4684	271.532	164.654	62.2068	1804	333	1471	892	337	0.7263
2022	08.22	SS	1	700	67414	339	1787	1448	364	388	496	847	1419	0.1897	0.81	5.1806	4.271	0.3508	0.7459	0.2541	0.1657	0.3614	46.5962	48.0026	0.0666	1.2714	0.2412	1.0302	0.6688	0.262	0.8103	0.6492	0.526	0.3915	0.2059	0.254162	0.2541	266.635	339	64.3095	274.69	178.321	69.8109	1787	339	1448	940	368	0.7866
2022	08.22	SS	1	700	69904	351	1799	1448	370	400	509	854	1414	0.1951	0.805	4.9649	4.125	0.3474	0.7341	0.2659	0.2072	0.3637	48.3157	50.589	0.069	1.3009	0.2538	1.0471	0.6833	0.278	0.8049	0.6526	0.5253	0.4074	0.214	0.265869	0.2659	269.813	351	68.483	282.517	184.377	75.1167	1799	351	1448	945	385	0.7687
2022	08.22	SS	1	700	61905	324	1743	1419	352	377	502	897	1420	0.1859	0.814	4.2366	4.38	0.4038	0.7724	0.2276	0.1762	0.4181	43.6652	45.2147	0.0624	1.2719	0.2364	1.0355	0.6174	0.236	0.8141	0.5962	0.4854	0.3818	0.1853	0.227629	0.2276	254.737	324	60.2272	263.773	157.26	60.0413	1743	324	1419	846	323	0.7862
2022	08.22	SS	1	900	70928	326	1827	1501	351	373	486	884	1455	0.1784	0.822	5.5736	4.604	0.3718	0.7522	0.2478	0.1466	0.3553	47.2931	45.2024	0.0525	1.1634	0.2076	0.9558	0.6005	0.237	0.8216	0.6282	0.5161	0.3945	0.2036	0.247825	0.2478	280.213	326	58.1697	267.83	168.264	66.3777	1827	326	1501	943	372	0.8596
2022	08.22	SS	1	800	60980	323	1741	1418	351	374	492	886	1422	0.1855	0.814	4.5224	4.39	0.397	0.775	0.225	0.1622	0.3973	43.0434	43.0689	0.0538	1.2285	0.2279	1.0006	0.6033	0.225	0.8145	0.603	0.4911	0.3731	0.1832	0.224979	0.225	262.922	323	59.9248	263.075	158.624	59.1827	1741	323	1418	855	319	0.814
2022	08.22	SS	1	800	59548	304	1558	1254	331	354	463	809	1239	0.1951	0.805	3.91	4.125	0.4027	0.7456	0.2544	0.1834	0.4226	47.5255	49.8782	0.0594	1.3039	0.2544	1.0495	0.6269	0.267	0.8049	0.5973	0.4807	0.4259	0.2047	0.25439	0.2544	233.147	304	59.3171	244.683	146.146	62.2439	1558	304	1254	749	319	0.7669
2022	08.22	SS	1	800	55753	345	1581	1236	378	407	535	889	1292	0.2182	0.782	2.5502	3.583	0.4401	0.7662	0.2338	0.2346	0.5124	45.1468	52.5606	0.0564	1.4892	0.325	1.1642	0.6518	0.272	0.7818	0.5599	0.4377	0.4176	0.1828	0.233814	0.2338	231.668	345	75.2846	269.715	151.006	63.0645	1581	345	1236	692	289	0.6715
2022	08.22	SS	1	700	54666	334	2037	1703	382	427	642	1100	1751	0.164	0.836	3.2421	5.099	0.4498	0.8321	0.1679	0.2642	0.6029	32.1392	43.0761	0.0459	1.6032	0.2629	1.3403	0.7374	0.225	0.836	0.5502	0.46	0.3052	0.1404	0.167921	0.1679	208.333	334	54.7649	279.235	153.637	46.8945	2037	334	1703	937	286	0.6238
2022	08.22	SS	2	700	51572	367	2100	1733	420	468	697	1140	1808	0.1748	0.825	2.8341	4.722	0.446	0.8315	0.1685	0.277	0.6347	29.759	42.3478	0.0425	1.7244	0.3014	1.423	0.7883	0.24	0.8252	0.554	0.4571	0.3042	0.139	0.168527	0.1685	212.828	367	64.1376	302.862	167.771	51.0305	2100	367	1733	960	292	0.5799
2022	08.22	SS	2	600	51926	603	1980	1377	639	672	791	1041	1647	0.3045	0.695	1.983	2.284	0.3181	0.7582	0.2418	0.2397	0.4551	37.7095	53.9528	0.0628	2.0573	0.6265	1.4307	0.9757	0.346	0.6955	0.6819	0.4742	0.3546	0.1682	0.241802	0.2418	293.103	603	183.641	419.359	285.968	101.414	1980	603	1377	939	333	0.4861
2022	08.22	SS	2	700	58373	348	1884	1536	394	427	606	1020	1576	0.1847	0.815	3.0127	4.414	0.4375	0.7995	0.2005	0.2148	0.5599	38.0035	48.6355	0.0543	1.5697	0.2899	1.2798	0.7199	0.257	0.8153	0.5625	0.4586	0.3565	0.1635	0.200531	0.2005	221.698	348	64.2803	283.72	159.592	56.8917	1884	348	1536	864	308	0.6371
2022	08.22	SS	2	600	61876	389	1788	1399	426	462	609	911	1409	0.2176	0.782	2.8044	3.596	0.3731	0.7291	0.2709	0.2573	0.5242	44.2286	62.1346	0.0737	1.7955	0.3906	1.4049	0.8807	0.381	0.7824	0.6269	0.4905	0.4322	0.212	0.270946	0.2709	216.653	389	84.6314	304.369	190.802	82.4558	1788	389	1399	877	379	0.557
2022	08.22	SS	2	700	61297	368	1912	1544	403	434	587	975	1552	0.1925	0.808	3.6241	4.196	0.3931	0.7668	0.2332	0.2008	0.4728	39.7	47.7447	0.0567	1.4893	0.2866	1.2026	0.7298	0.28	0.8075	0.6069	0.4901	0.3842	0.1883	0.233171	0.2332	247.096	368	70.8285	297.171	180.343	69.2887	1912	368	1544	937	360	0.6715
2022	08.22	SS	2	600	57855	338	1914	1576	373	404	558	973	1583	0.1766	0.823	4.1054	4.663	0.4029	0.79	0.21	0.1967	0.4653	36.7101	42.3948	0.0612	1.4025	0.2477	1.1549	0.6895	0.243	0.8234	0.5971	0.4916	0.3518	0.1729	0.21006	0.21	240.998	338	59.6886	278.311	166.174	58.4525	1914	338	1576	941	331	0.713
2022	08.22	SS	2	700	57815	347	1721	1374	379	406	548	950	1409	0.2016	0.798	3.0315	3.96	0.4389	0.7729	0.2271	0.1965	0.4876	42.078	46.7533	0.0601	1.3917	0.2806	1.1111	0.6235	0.252	0.7984	0.5611	0.448	0.4047	0.1813	0.227077	0.2271	249.335	347	69.9646	277.035	155.454	62.9076	1721	347	1374	771	312	0.7185
2022	08.22	SS	2	700	43648	318	1432	1114	352	379	517	850	1175	0.2221	0.778	1.9926	3.503	0.4776	0.7693	0.2307	0.2424	0.5955	39.1817	48.8544	0.056	1.6028	0.3559	1.2469	0.6514	0.288	0.7779	0.5224	0.4064	0.4416	0.1795	0.230692	0.2307	198.403	318	70.6173	247.383	129.243	57.0712	1432	318	1114	582	257	0.6239
2022	08.22	SS	2	700	60797	330	1972	1642	372	405	574	1016	1658	0.1673	0.833	4.0582	4.976	0.4178	0.8088	0.1912	0.201	0.4953	37.0262	43.8989	0.0529	1.4239	0.2383	1.1856	0.6903	0.227	0.8327	0.5822	0.4848	0.3285	0.1592	0.191253	0.1912	231.758	330	55.2231	274.777	159.98	52.5456	1972	330	1642	956	314	0.7023
2022	08.22	SS	3	700	59775	348	2220	1872	391	429	620	1128	1897	0.1568	0.843	4.5527	5.379	0.4167	0.8275	0.1725	0.203	0.4843	31.9706	37.1625	0.0457	1.3785	0.2161	1.1624	0.6781	0.201	0.8432	0.5833	0.4919	0.2958	0.1455	0.17254	0.1725	252.448	348	54.5514	293.449	171.178	50.6324	2220	348	1872	1092	323	0.7254
2022	08.22	SS	3	600	39689	311	2018	1707	360	404	617	1096	1786	0.1541	0.846	3.4973	5.489	0.4599	0.8641	0.1359	0.2578	0.5975	23.2898	30.2619	0.0388	1.5361	0.2367	1.2994	0.7018	0.177	0.8459	0.5401	0.4569	0.2516	0.115	0.135889	0.1359	202.461	311	47.9291	263.071	142.092	35.7542	2018	311	1707	922	232	0.651
2022	08.22	SS	3	700	46606	292	1562	1270	327	359	508	854	1309	0.1869	0.813	2.8978	4.349	0.4425	0.8008	0.1992	0.252	0.5669	36.7364	47.0645	0.0525	1.5757	0.2946	1.2811	0.7142	0.255	0.8131	0.5575	0.4533	0.3573	0.162	0.199195	0.1992	185.314	292	54.5864	237.414	132.353	47.2958	1562	292	1270	708	253	0.6346
2022	08.22	SS	3	700	53791	342	2004	1662	387	423	613	1063	1709	0.1707	0.829	3.4986	4.86	0.4338	0.8225	0.1775	0.2166	0.5435	32.4046	40.5994	0.0463	1.5107	0.2578	1.2529	0.7094	0.222	0.8293	0.5662	0.4696	0.3135	0.1472	0.177504	0.1775	226.385	342	58.3653	283.635	160.59	50.3443	2004	342	1662	941	295	0.6619
2022	08.22	SS	3	800	63941	328	1933	1605	360	391	538	965	1596	0.1697	0.83	4.6821	4.893	0.3969	0.79	0.21	0.1931	0.4361	39.8781	43.8221	0.0498	1.3235	0.2246	1.0989	0.6628	0.231	0.8303	0.6031	0.5008	0.3481	0.1743	0.209939	0.21	247.828	328	55.6565	272.344	164.255	57.1837	1933	328	1605	968	337	0.7556
2022	08.22	SS	3	700	57333	327	1990	1663	365	396	554	1005	1677	0.1643	0.836	4.6104	5.086	0.4077	0.8118	0.1882	0.1864	0.455	34.5151	38.5198	0.0493	1.3355	0.2194	1.116	0.661	0.21	0.8357	0.5923	0.495	0.3178	0.1573	0.188233	0.1882	244.852	327	53.7332	273.267	161.857	51.4327	1990	327	1663	985	313	0.7488
2022	08.22	SS	3	600	59499	342	2213	1871	380	417	593	1098	1872	0.1545	0.845	5.1367	5.471	0.4041	0.8177	0.1823	0.1978	0.4472	31.8398	35.2372	0.0531	1.309	0.2023	1.1067	0.6595	0.202	0.8455	0.5959	0.5038	0.3058	0.1541	0.182226	0.1823	261.268	342	52.8531	289.147	172.314	52.6986	2213	342	1871	1115	341	0.7639
2022	08.22	SS	3	700	51044	352	2086	1734	403	448	671	1108	1802	0.1687	0.831	3.1386	4.926	0.436	0.8362	0.1638	0.2595	0.6132	29.4764	41.4593	0.0421	1.692	0.2855	1.4065	0.7933	0.23	0.8313	0.564	0.4688	0.2904	0.1361	0.163786	0.1638	208.038	352	59.3979	292.602	165.032	47.9233	2086	352	1734	978	284	0.591
2022	08.22	SS	3	700	68252	323	1973	1650	353	377	503	898	1601	0.1637	0.836	6.3784	5.108	0.3485	0.7745	0.2255	0.1455	0.3636	41.4043	43.2045	0.0591	1.2477	0.2043	1.0435	0.6798	0.235	0.8363	0.6515	0.5449	0.346	0.1885	0.225419	0.2255	258.876	323	52.8784	270.122	175.988	60.9002	1973	323	1650	1075	372	0.8014
2022	08.22	SS	4	700	51112	337	2144	1807	382	420	622	1128	1861	0.1572	0.843	4.0276	5.362	0.4377	0.8434	0.1566	0.2103	0.5257	28.2855	33.9713	0.0404	1.425	0.224	1.201	0.6753	0.188	0.8428	0.5623	0.4739	0.2785	0.132	0.156601	0.1566	236.491	337	52.9706	284.029	159.698	44.4827	2144	337	1807	1016	283	0.7018
2022	08.22	SS	4	600	44557	387	1979	1592	430	469	648	1056	1702	0.1956	0.804	2.9257	4.114	0.4202	0.826	0.174	0.245	0.5465	28.027	36.4477	0.0467	1.6166	0.3161	1.3004	0.754	0.226	0.8044	0.5798	0.4664	0.3001	0.14	0.173998	0.174	239.391	387	75.6791	311.321	180.496	54.1683	1979	387	1592	923	277	0.6186
2022	08.22	SS	4	700	61372	340	1895	1555	371	399	533	909	1555	0.1794	0.821	4.7933	4.574	0.3659	0.7814	0.2186	0.1801	0.4137	39.5066	44.6677	0.0564	1.3779	0.2472	1.1306	0.7169	0.247	0.8206	0.6341	0.5203	0.3448	0.1794	0.218638	0.2186	246.752	340	61.0026	278.997	176.908	61.0026	1895	340	1555	986	340	0.7258
2022	08.22	SS	4	800	63901	324	2044	1720	357	387	540	996	1695	0.1585	0.841	5.4185	5.309	0.3907	0.7971	0.2029	0.1744	0.4186	37.1914	39.8479	0.0465	1.2733	0.2018	1.0714	0.6528	0.217	0.8415	0.6093	0.5127	0.333	0.1707	0.202897	0.2029	254.457	324	51.3581	272.642	166.121	55.3209	2044	324	1720	1048	349	0.7854
2022	08.22	SS	4	600	54440	331	1915	1584	378	421	619	1025	1610	0.1728	0.827	3.0581	4.785	0.4381	0.8074	0.1926	0.2715	0.6061	34.4077	47.5957	0.0573	1.6723	0.2891	1.3833	0.7772	0.266	0.8272	0.5619	0.4648	0.3427	0.1593	0.192563	0.1926	197.931	331	57.212	273.788	153.833	52.718	1915	331	1584	890	305	0.598
2022	08.22	SS	4	700	58254	308	1760	1452	339	367	499	877	1443	0.175	0.825	4.4951	4.714	0.3919	0.7817	0.2183	0.1928	0.4385	40.1592	44.935	0.0574	1.3563	0.2373	1.1189	0.6804	0.244	0.825	0.6081	0.5017	0.359	0.1801	0.218308	0.2183	227.088	308	53.9	254.1	154.525	55.475	1760	308	1452	883	317	0.7373
2022	08.22	SS	4	700	59892	323	1815	1492	351	371	505	892	1473	0.178	0.822	4.8143	4.619	0.3814	0.7708	0.2292	0.134	0.4066	40.1817	42.8417	0.0574	1.297	0.2308	1.0662	0.6596	0.244	0.822	0.6186	0.5085	0.3705	0.1884	0.229191	0.2292	249.036	323	57.4815	265.519	164.258	60.8628	1815	323	1492	923	342	0.771
2022	08.22	SS	4	600	53151	349	1924	1575	393	426	605	1012	1622	0.1814	0.819	3.2902	4.513	0.421	0.8083	0.1917	0.2095	0.5418	33.7857	43.4849	0.0563	1.5723	0.2852	1.2871	0.7453	0.247	0.8186	0.579	0.474	0.3311	0.157	0.191707	0.1917	221.968	349	63.3061	285.694	165.43	54.7807	1924	349	1575	912	302	0.636
2022	08.22	SS	4	700	60682	338	1956	1618	373	406	559	976	1635	0.1728	0.827	4.3898	4.787	0.3943	0.8016	0.1984	0.204	0.4553	37.5437	43.3498	0.0536	1.3959	0.2412	1.1546	0.6994	0.229	0.8272	0.6057	0.501	0.3276	0.1641	0.198427	0.1984	242.138	338	58.407	279.593	169.346	55.4693	1956	338	1618	980	321	0.7164
2022	08.22	SS	5	800	62613	338	1899	1561	366	393	512	874	1577	0.178	0.822	5.5909	4.618	0.3434	0.7937	0.2063	0.173	0.3716	40.1107	43.4033	0.0501	1.3164	0.2343	1.0821	0.7105	0.223	0.822	0.6566	0.5398	0.3141	0.1696	0.206238	0.2063	256.761	338	60.1601	277.84	182.438	57.3123	1899	338	1561	1025	322	0.7597
2022	08.22	SS	5	800	56427	324	1821	1497	357	385	528	938	1526	0.1779	0.822	4.1102	4.62	0.4102	0.8029	0.1971	0.187	0.4542	37.6937	41.7455	0.0471	1.3472	0.2397	1.1075	0.6533	0.218	0.8221	0.5898	0.4849	0.3341	0.162	0.197052	0.1971	240.499	324	57.6474	266.353	157.107	52.4876	1821	324	1497	883	295	0.7423
2022	08.22	SS	5	800	61903	386	1910	1524	415	438	570	967	1576	0.2021	0.798	4.0363	3.948	0.3812	0.7808	0.2192	0.1509	0.4024	40.6189	42.8794	0.0508	1.323	0.2674	1.0557	0.6532	0.231	0.7979	0.6188	0.4937	0.3542	0.1749	0.219179	0.2192	291.761	386	78.0084	307.992	190.575	67.4995	1910	386	1524	943	334	0.7558
2022	08.22	SS	5	700	56558	337	1895	1558	371	404	563	976	1602	0.1778	0.822	3.8641	4.623	0.4101	0.8119	0.1881	0.2118	0.4835	36.302	42.7973	0.0519	1.4339	0.255	1.1789	0.6954	0.222	0.8222	0.5899	0.485	0.3188	0.1546	0.18806	0.1881	235.023	337	59.9309	277.069	163.432	52.1061	1895	337	1558	919	293	0.6974
2022	08.22	SS	5	800	56016	412	1978	1566	455	492	675	1071	1688	0.2083	0.792	2.5945	3.801	0.4208	0.8148	0.1852	0.2363	0.5598	35.7704	47.5853	0.0447	1.6803	0.35	1.3303	0.7705	0.246	0.7917	0.5792	0.4585	0.3197	0.1466	0.18517	0.1852	245.194	412	85.816	326.184	188.92	60.4044	1978	412	1566	907	290	0.5951
2022	08.22	SS	5	260	638725	364	4095	3731	396	426	555	880	1261	0.0889	0.911	39.2991	10.25	0.1383	0.2404	0.7596	0.0804	0.1706	171.194	211.228	0.6584	1.3542	0.1204	1.2339	1.0632	0.937	0.9111	0.8617	0.7851	0.8815	0.6921	0.759589	0.7596	268.793	364	32.3556	331.644	285.778	251.911	4095	364	3731	3215	2834	0.7384
2022	08.22	SS	5	600	41887	367	1799	1432	401	432	564	880	1519	0.204	0.796	3.6222	3.902	0.3582	0.8045	0.1955	0.2165	0.4586	29.2508	37.4425	0.0488	1.6081	0.3281	1.2801	0.8215	0.25	0.796	0.6418	0.5108	0.3047	0.1556	0.195556	0.1955	228.22	367	74.8688	292.131	187.478	57.1206	1799	367	1432	919	280	0.6218
2022	08.22	SS	5	700	56326	331	1860	1529	369	406	573	981	1561	0.178	0.822	3.4482	4.619	0.4251	0.8044	0.1956	0.242	0.5276	36.8384	45.7174	0.0526	1.5097	0.2687	1.241	0.7134	0.243	0.822	0.5749	0.4726	0.3402	0.1608	0.195581	0.1956	219.249	331	58.9038	272.096	156.424	53.2091	1860	331	1529	879	299	0.6624
2022	08.22	SS	5	700	53030	351	2000	1649	389	420	586	1050	1718	0.1755	0.825	3.9147	4.698	0.4239	0.829	0.171	0.188	0.475	32.1588	36.0387	0.0459	1.3592	0.2385	1.1206	0.6456	0.192	0.8245	0.5761	0.475	0.2968	0.141	0.170986	0.171	258.24	351	61.6005	289.399	166.725	49.491	2000	351	1649	950	282	0.7357
2022	08.22	SS	6	700	55941	346	1937	1591	389	428	604	1025	1646	0.1786	0.821	3.3377	4.598	0.4268	0.8171	0.1829	0.2451	0.5405	35.1608	44.5336	0.0502	1.542	0.2754	1.2666	0.726	0.232	0.8214	0.5732	0.4708	0.3191	0.1502	0.182908	0.1829	224.384	346	61.8049	284.195	162.908	51.9804	1937	346	1591	912	291	0.6485
2022	08.22	SS	6	700	58407	343	1832	1489	375	405	546	934	1527	0.1872	0.813	3.902	4.341	0.3969	0.7952	0.2048	0.2015	0.4544	39.2255	44.9113	0.056	1.4087	0.2637	1.145	0.6905	0.235	0.8128	0.6031	0.4902	0.3396	0.1665	0.204813	0.2048	243.487	343	64.2189	278.781	168.13	57.1043	1832	343	1489	898	305	0.7099
2022	08.22	SS	6	800	62023	340	1777	1437	372	400	539	919	1464	0.1913	0.809	3.684	4.226	0.4029	0.7822	0.2178	0.1949	0.4616	43.1615	49.4481	0.054	1.4167	0.2711	1.1457	0.684	0.25	0.8087	0.5971	0.4828	0.3648	0.1761	0.217822	0.2178	239.994	340	65.0535	274.947	164.164	59.8875	1777	340	1437	858	313	0.7059
2022	08.22	SS	6	500	37633	408	1695	1287	446	478	621	911	1385	0.2407	0.759	2.204	3.154	0.3908	0.7591	0.2409	0.2486	0.5517	29.2412	41.2749	0.0585	1.859	0.4475	1.4115	0.8599	0.34	0.7593	0.6092	0.4625	0.3954	0.1829	0.240878	0.2409	219.473	408	98.2088	309.791	188.715	74.6195	1695	408	1287	784	310	0.5379
2022	08.22	SS	6	800	50424	353	1713	1360	384	412	537	844	1406	0.2061	0.794	3.6115	3.853	0.361	0.7743	0.2257	0.2059	0.451	37.0767	46.3145	0.0463	1.5734	0.3242	1.2492	0.7982	0.282	0.7939	0.639	0.5073	0.3533	0.1792	0.225759	0.2257	224.355	353	72.7431	280.257	179.076	63.2639	1713	353	1360	869	307	0.6356
2022	08.22	SS	6	800	51984	355	1668	1313	390	421	570	914	1382	0.2128	0.787	2.5526	3.699	0.4257	0.7822	0.2178	0.2361	0.5458	39.5915	50.7584	0.0495	1.6287	0.3466	1.2821	0.7362	0.279	0.7872	0.5743	0.452	0.3793	0.1715	0.217832	0.2178	217.965	355	75.5546	279.445	160.474	60.8693	1668	355	1313	754	286	0.614
2022	08.22	SS	6	700	56892	387	1862	1475	423	455	614	1020	1564	0.2078	0.792	2.7998	3.811	0.4292	0.798	0.202	0.2169	0.513	38.5706	46.106	0.0551	1.509	0.3136	1.1954	0.6824	0.242	0.7922	0.5708	0.4522	0.3539	0.16	0.202006	0.202	256.461	387	80.4345	306.565	175.002	61.9366	1862	387	1475	842	298	0.6627
2022	08.22	SS	6	800	53471	339	1599	1260	364	390	512	849	1308	0.212	0.788	3.1743	3.717	0.4048	0.769	0.231	0.2063	0.4577	42.437	47.9843	0.053	1.4349	0.3042	1.1307	0.673	0.261	0.788	0.5952	0.469	0.388	0.182	0.230938	0.231	236.253	339	71.8705	267.13	159.006	61.6942	1599	339	1260	750	291	0.6969
2022	08.22	SS	6	800	57427	417	1765	1348	448	476	607	970	1463	0.2363	0.764	2.5826	3.233	0.4102	0.776	0.224	0.2077	0.4698	42.6019	48.7906	0.0533	1.4996	0.3543	1.1453	0.6754	0.257	0.7637	0.5898	0.4504	0.3799	0.1711	0.224065	0.224	278.074	417	98.5207	318.479	187.827	71.3507	1765	417	1348	795	302	0.6669
2022	08.22	SS	7	600	51720	337	1953	1616	380	417	595	1019	1667	0.1726	0.827	3.591	4.795	0.422	0.823	0.177	0.229	0.5322	32.005	40.3582	0.0533	1.524	0.263	1.261	0.7288	0.223	0.8274	0.578	0.4782	0.3062	0.1464	0.176984	0.177	221.129	337	58.151	278.849	161.166	49.3507	1953	337	1616	934	286	0.6562
2022	08.22	SS	7	700	50128	358	2028	1670	408	454	671	1084	1756	0.1765	0.823	2.8963	4.665	0.4347	0.8371	0.1629	0.2754	0.6248	30.0168	43.1371	0.0429	1.7452	0.3081	1.4371	0.8123	0.234	0.8235	0.5653	0.4655	0.2881	0.1341	0.162863	0.1629	205.134	358	63.1972	294.803	166.643	48.0158	2028	358	1670	944	272	0.573
2022	08.22	SS	7	600	48677	383	2245	1862	447	497	760	1245	1984	0.1706	0.829	2.6739	4.862	0.4629	0.8598	0.1402	0.2685	0.6749	26.1423	38.1116	0.0436	1.7577	0.2999	1.4578	0.7829	0.204	0.8294	0.5371	0.4454	0.261	0.1163	0.140183	0.1402	217.898	383	65.3403	317.66	170.601	44.5269	2245	383	1862	1000	261	0.5689
2022	08.22	SS	7	700	48877	324	1853	1529	364	398	572	981	1588	0.1749	0.825	3.4229	4.719	0.4297	0.8267	0.1733	0.2224	0.5407	31.9666	40.2218	0.0457	1.5249	0.2666	1.2582	0.7176	0.218	0.8251	0.5703	0.4706	0.3039	0.143	0.173314	0.1733	212.473	324	56.6519	267.348	152.471	46.3357	1853	324	1529	872	265	0.6558
2022	08.22	SS	7	700	56544	332	1858	1526	367	395	549	964	1568	0.1787	0.821	3.8882	4.596	0.4142	0.81	0.19	0.1835	0.474	37.0535	42.4083	0.0529	1.3935	0.249	1.1445	0.6705	0.218	0.8213	0.5858	0.4812	0.3244	0.1561	0.190034	0.19	238.249	332	59.324	272.676	159.746	51.8192	1858	332	1526	894	290	0.7176
2022	08.22	SS	7	700	42597	356	1706	1350	402	446	635	1014	1468	0.2087	0.791	1.8607	3.792	0.4874	0.8237	0.1763	0.3259	0.6889	31.5533	44.5966	0.0451	1.7861	0.3727	1.4134	0.7245	0.249	0.7913	0.5126	0.4056	0.3439	0.1395	0.176283	0.1763	199.317	356	74.2884	281.712	144.403	49.6647	1706	356	1350	692	238	0.5599
2022	08.22	SS	7	700	52889	338	1901	1563	376	411	574	1003	1624	0.1778	0.822	3.6168	4.624	0.4255	0.8228	0.1772	0.2239	0.5033	33.8379	40.0288	0.0483	1.4388	0.2558	1.183	0.6797	0.21	0.8222	0.5745	0.4724	0.3085	0.1457	0.177233	0.1772	234.918	338	60.0968	277.903	159.665	49.2509	1901	338	1563	898	277	0.695
2022	08.22	SS	7	700	49643	333	1961	1628	371	404	566	1001	1681	0.1698	0.83	4.1806	4.889	0.4103	0.828	0.172	0.2027	0.4771	30.4932	35.4537	0.0436	1.4005	0.2378	1.1627	0.6856	0.2	0.8302	0.5897	0.4895	0.2917	0.1428	0.172015	0.172	237.772	333	56.5472	276.453	163.019	47.5472	1961	333	1628	960	280	0.714
2022	08.22	SS	7	700	42992	346	1784	1438	386	421	598	1025	1548	0.1939	0.806	2.5225	4.156	0.4722	0.8359	0.1641	0.2434	0.5841	29.8968	36.9857	0.0427	1.5348	0.2977	1.2371	0.653	0.203	0.8061	0.5278	0.4254	0.3109	0.1323	0.164093	0.1641	225.437	346	67.1054	278.895	147.205	45.7713	1784	346	1438	759	236	0.6516
2022	08.22	SS	8	600	31839	303	1925	1622	360	412	655	1119	1745	0.1574	0.843	2.582	5.353	0.5031	0.889	0.111	0.3206	0.7234	19.6297	28.2257	0.0327	1.7065	0.2686	1.4379	0.7145	0.16	0.8426	0.4969	0.4187	0.2233	0.0935	0.110958	0.111	177.556	303	47.693	255.307	126.867	28.3325	1925	303	1622	806	180	0.586
2022	08.22	SS	8	700	45911	361	2053	1692	416	457	694	1175	1820	0.1758	0.824	2.5462	4.687	0.4811	0.8623	0.1377	0.2423	0.656	27.1342	37.0011	0.0388	1.6546	0.2909	1.3636	0.7076	0.188	0.8242	0.5189	0.4277	0.2654	0.1135	0.137716	0.1377	218.18	361	63.4783	297.522	154.388	40.9708	2053	361	1692	878	233	0.6044
2022	08.22	SS	8	700	47730	363	2127	1764	420	469	711	1184	1881	0.1707	0.829	2.7302	4.86	0.4654	0.8605	0.1395	0.2778	0.6576	27.0579	38.2304	0.0387	1.7037	0.2908	1.4129	0.7553	0.197	0.8293	0.5346	0.4433	0.2609	0.1157	0.139477	0.1395	213.066	363	61.9506	301.049	160.935	41.9831	2127	363	1764	943	246	0.587
2022	08.22	SS	8	800	49155	343	2028	1685	387	426	614	1085	1789	0.1691	0.831	3.5508	4.913	0.4404	0.8582	0.1418	0.2315	0.5361	29.172	35.5149	0.0365	1.4653	0.2478	1.2174	0.6813	0.173	0.8309	0.5596	0.465	0.2534	0.1179	0.141803	0.1418	234.082	343	58.0123	284.988	159.492	40.4226	2028	343	1685	943	239	0.6825
2022	08.22	SS	8	700	48001	341	1756	1415	369	398	536	929	1493	0.1942	0.806	3.5452	4.15	0.4155	0.8141	0.1859	0.2049	0.4594	33.9228	37.4997	0.0485	1.3718	0.2664	1.1054	0.6461	0.205	0.8058	0.5845	0.471	0.318	0.1498	0.185871	0.1859	248.579	341	66.2192	274.781	160.596	51.0723	1756	341	1415	827	263	0.7289
2022	08.22	SS	8	700	31613	334	1899	1565	386	432	651	1087	1728	0.1759	0.824	2.4728	4.686	0.4812	0.8907	0.1093	0.2939	0.6752	20.1999	28.3461	0.0289	1.7028	0.2995	1.4033	0.7281	0.153	0.8241	0.5188	0.4276	0.2106	0.09	0.109259	0.1093	196.148	334	58.7446	275.255	142.816	30.0758	1899	334	1565	812	171	0.5873
2022	08.22	SS	8	600	46901	380	1885	1505	423	462	637	1015	1625	0.2016	0.798	2.6761	3.961	0.4219	0.8272	0.1728	0.2591	0.5692	31.1632	42.0417	0.0519	1.6897	0.3406	1.3491	0.7799	0.233	0.7984	0.5781	0.4615	0.2989	0.1379	0.172794	0.1728	224.892	380	76.6048	303.395	175.385	52.4138	1885	380	1505	870	260	0.5918
2022	08.22	SS	8	600	35649	393	1494	1101	429	464	613	931	1282	0.2631	0.737	1.3209	2.802	0.4886	0.8074	0.1926	0.3179	0.6661	32.3788	44.1346	0.054	1.8496	0.4865	1.3631	0.697	0.262	0.7369	0.5114	0.3768	0.3766	0.1419	0.192593	0.1926	212.478	393	103.379	289.62	148.098	55.7671	1494	393	1101	563	212	0.5407
2022	08.22	SS	8	600	44734	367	1665	1298	401	434	586	962	1421	0.2204	0.78	2.2127	3.537	0.4584	0.812	0.188	0.2542	0.5624	34.4636	42.2831	0.0574	1.5738	0.3469	1.2269	0.6645	0.231	0.7796	0.5416	0.4222	0.3471	0.1465	0.187989	0.188	233.194	367	80.8943	286.106	154.956	53.7826	1665	367	1298	703	244	0.6354
2022	08.22	C	9	700	66924	311	1773	1462	335	356	460	836	1405	0.1754	0.825	6.0942	4.701	0.3591	0.7483	0.2517	0.1436	0.3397	45.8151	43.3425	0.0655	1.1473	0.2012	0.946	0.6063	0.238	0.8246	0.6409	0.5285	0.3927	0.2076	0.251681	0.2517	271.071	311	54.5522	256.448	164.358	64.5505	1773	311	1462	937	368	0.8716
2022	08.22	C	9	600	55156	351	2311	1960	390	426	604	1138	1981	0.1519	0.848	5.4894	5.584	0.4015	0.8316	0.1684	0.1837	0.4303	28.18	30.1971	0.047	1.2635	0.1919	1.0716	0.6413	0.18	0.8481	0.5985	0.5076	0.2813	0.1428	0.168358	0.1684	277.8	351	53.3107	297.689	178.158	50.1212	2311	351	1960	1173	330	0.7915
2022	08.22	C	9	700	39569	258	1217	959	280	299	391	689	1000	0.212	0.788	2.907	3.717	0.4494	0.7737	0.2263	0.1981	0.4623	41.3005	42.4823	0.059	1.3053	0.2767	1.0286	0.5663	0.233	0.788	0.5506	0.4339	0.411	0.1783	0.226297	0.2263	197.656	258	54.6952	203.305	111.934	46.0033	1217	258	959	528	217	0.7661
2022	08.22	C	9	700	51243	308	1486	1178	337	359	477	835	1225	0.2073	0.793	2.9198	3.825	0.4474	0.7784	0.2216	0.1868	0.4782	43.5395	46.5413	0.0622	1.3484	0.2795	1.0689	0.5907	0.237	0.7927	0.5526	0.4381	0.4009	0.1756	0.221537	0.2216	228.419	308	63.8385	244.161	134.931	54.0969	1486	308	1178	651	261	0.7416
2022	08.22	C	9	700	56577	315	1690	1375	343	370	497	895	1387	0.1864	0.814	3.8783	4.365	0.4218	0.7796	0.2204	0.1964	0.4412	41.1863	43.08	0.0588	1.2856	0.2396	1.046	0.6048	0.23	0.8136	0.5782	0.4704	0.3811	0.1793	0.220352	0.2204	245.022	315	58.713	256.287	148.18	56.4763	1690	315	1375	795	303	0.7778
2022	08.22	C	9	700	47118	277	1394	1117	306	325	435	774	1144	0.1987	0.801	3.1698	4.032	0.4449	0.7762	0.2238	0.1701	0.4715	42.2215	44.7418	0.0603	1.3225	0.2628	1.0597	0.5882	0.237	0.8013	0.5551	0.4448	0.4032	0.1793	0.223816	0.2238	209.452	277	55.0423	221.958	123.199	49.6772	1394	277	1117	620	250	0.7562
2022	08.22	C	9	600	39205	276	1336	1060	298	318	411	718	1093	0.2066	0.793	3.4873	3.841	0.417	0.7708	0.2292	0.1887	0.4245	37.0253	37.6954	0.0617	1.2832	0.2651	1.0181	0.5936	0.233	0.7934	0.583	0.4626	0.3932	0.1819	0.229236	0.2292	215.087	276	57.018	218.982	127.671	50.2006	1336	276	1060	618	243	0.7793
2022	08.22	C	9	700	50678	312	1521	1209	337	360	471	825	1240	0.2051	0.795	3.3707	3.875	0.4243	0.7676	0.2324	0.1902	0.4384	41.9566	43.3469	0.0599	1.2998	0.2666	1.0331	0.5948	0.24	0.7949	0.5757	0.4576	0.4037	0.1847	0.23241	0.2324	240.037	312	64	248	142.769	57.641	1521	312	1209	696	281	0.7694
2022	08.22	C	9	675	50808.8	301	1591	1290	328.25	351.625	468.25	838.75	1309.38	0.192925	0.807125	3.91456	4.2425	0.420675	0.778275	0.221725	0.1822	0.435762	40.1531	41.4284	0.0593	1.28195	0.247925	1.034	0.59825	0.2285	0.807075	0.579325	0.467938	0.383388	0.178687	0.221711	0.221725	235.568	301	57.6462	243.354	141.4	53.5959	1591	301	1290	752.25	281.625	0.781687
2022	08.22	C	10	700	54821	338	1956	1618	377	411	576	995	1642	0.1728	0.827	3.9972	4.787	0.4061	0.8059	0.1941	0.2101	0.4903	33.9211	40.96	0.0485	1.4598	0.2522	1.2075	0.7172	0.234	0.8272	0.5939	0.4913	0.3267	0.1605	0.194027	0.1941	231.539	338	58.407	279.593	166.062	54.2597	1956	338	1618	961	314	0.685
2022	08.22	C	10	600	59633	345	2091	1746	379	413	560	988	1738	0.165	0.835	5.4199	5.061	0.3683	0.7978	0.2022	0.1947	0.4105	34.1935	38.1109	0.057	1.3348	0.2202	1.1146	0.7041	0.225	0.835	0.6317	0.5275	0.32	0.1688	0.202144	0.2022	258.466	345	56.9225	288.077	181.987	58.2425	2091	345	1746	1103	353	0.7492
2022	08.22	C	10	600	54787	356	2191	1835	397	430	598	1054	1853	0.1625	0.838	5.0707	5.154	0.3804	0.8158	0.1842	0.1798	0.4396	29.896	34.5503	0.0498	1.3799	0.2242	1.1557	0.7161	0.213	0.8375	0.6196	0.5189	0.2973	0.1543	0.184207	0.1842	257.99	356	57.8439	298.156	184.743	54.9192	2191	356	1835	1137	338	0.7247
2022	08.22	C	10	700	56658	339	1758	1419	368	393	518	882	1451	0.1928	0.807	4.1337	4.186	0.3827	0.7837	0.2163	0.1762	0.4205	39.9677	43.9179	0.0571	1.3613	0.2625	1.0988	0.6783	0.238	0.8072	0.6173	0.4983	0.3505	0.1746	0.216364	0.2163	249.027	339	65.3703	273.63	168.922	59.1997	1758	339	1419	876	307	0.7346
2022	08.22	C	10	700	59904	328	1783	1455	357	379	497	869	1455	0.184	0.816	4.8944	4.436	0.3718	0.7746	0.2254	0.1512	0.3872	41.2103	42.9116	0.0589	1.276	0.2347	1.0413	0.6541	0.235	0.816	0.6282	0.5126	0.3589	0.184	0.225461	0.2254	257.053	328	60.3388	267.661	168.139	60.3388	1783	328	1455	914	328	0.7837
2022	08.22	C	10	900	39334	360	1467	1107	388	412	508	756	1292	0.2454	0.755	2.7868	3.075	0.3577	0.8419	0.1581	0.2168	0.4456	35.5712	44.3143	0.0395	1.6509	0.4051	1.2458	0.8001	0.197	0.7546	0.6423	0.4847	0.2461	0.1193	0.15807	0.1581	218.063	360	88.3436	271.656	174.478	42.9448	1467	360	1107	711	175	0.6057
2022	08.22	C	10	700	62436	337	1817	1480	362	385	489	841	1447	0.1855	0.815	5.7423	4.392	0.3405	0.75	0.25	0.1554	0.3423	42.2262	42.4497	0.0603	1.2342	0.2289	1.0053	0.6629	0.251	0.8145	0.6595	0.5371	0.3791	0.2036	0.250016	0.25	273.051	337	62.5036	274.496	181.019	68.6241	1817	337	1480	976	370	0.8102
2022	08.22	C	10	600	40746	343	1577	1234	372	399	512	804	1243	0.2175	0.782	3.2191	3.598	0.3736	0.7293	0.2707	0.2188	0.4565	33.0589	40.3974	0.0551	1.5616	0.3397	1.222	0.7655	0.331	0.7825	0.6264	0.4902	0.4321	0.2118	0.270667	0.2707	219.647	343	74.603	268.397	168.129	72.6455	1577	343	1234	773	334	0.6404
2022	08.22	C	10	687.5	53539.9	343.25	1830	1486.75	375	402.75	532.25	898.625	1515.12	0.190688	0.809375	4.40801	4.33613	0.372638	0.787375	0.212625	0.187875	0.424063	36.2556	40.9515	0.053275	1.40731	0.270937	1.13637	0.712288	0.2405	0.809312	0.627363	0.507575	0.338838	0.172113	0.21262	0.212625	245.604	343.25	65.5416	277.708	174.185	58.8968	1830	343.25	1486.75	931.375	314.875	0.716687
2022	08.22	C	11	600	55717	344	2229	1885	388	428	621	1117	1902	0.1543	0.846	4.6507	5.48	0.4101	0.8265	0.1735	0.2122	0.4898	29.5972	35.3533	0.0493	1.4125	0.218	1.1945	0.7046	0.207	0.8457	0.5899	0.4989	0.2941	0.1467	0.17349	0.1735	243.54	344	53.0893	290.911	171.614	50.4657	2229	344	1885	1112	327	0.708
2022	08.22	C	11	600	59836	339	1996	1657	370	398	535	935	1633	0.1698	0.83	5.4914	4.888	0.3597	0.7809	0.2191	0.169	0.3943	36.1504	39.6279	0.0603	1.3205	0.2243	1.0962	0.7019	0.24	0.8302	0.6403	0.5316	0.3421	0.1819	0.219047	0.2191	256.721	339	57.5757	281.424	180.2	61.6518	1996	339	1657	1061	363	0.7573
2022	08.22	C	11	700	56288	324	1696	1372	346	367	458	765	1334	0.191	0.809	5.9501	4.235	0.3214	0.7362	0.2638	0.1531	0.3256	41.0657	41.5934	0.0587	1.252	0.2392	1.0128	0.6873	0.267	0.809	0.6786	0.5489	0.3888	0.2134	0.26384	0.2638	258.786	324	61.8962	262.104	177.856	69.1557	1696	324	1372	931	362	0.7987
2022	08.22	C	11	700	64950	329	1891	1562	354	377	490	881	1538	0.174	0.826	6.1505	4.748	0.3534	0.774	0.226	0.1472	0.3436	41.6211	40.465	0.0595	1.177	0.2048	0.9722	0.6286	0.22	0.826	0.6466	0.5341	0.3495	0.1867	0.225987	0.226	279.524	329	57.2401	271.76	175.722	61.4157	1891	329	1562	1010	353	0.8496
2022	08.22	C	11	800	67136	336	1936	1600	363	388	502	907	1583	0.1736	0.826	6.0988	4.762	0.3569	0.7794	0.2206	0.1563	0.3458	41.9993	40.6998	0.0525	1.1726	0.2035	0.9691	0.6232	0.214	0.8264	0.6431	0.5315	0.3431	0.1823	0.220648	0.2206	286.543	336	58.314	277.686	178.587	61.2645	1936	336	1600	1029	353	0.8528
2022	08.22	C	11	600	50935	276	1546	1270	299	321	426	800	1250	0.1785	0.821	4.6998	4.601	0.4126	0.7669	0.2331	0.1732	0.3937	40.1455	38.3068	0.0669	1.1616	0.2074	0.9542	0.5605	0.222	0.8215	0.5874	0.4825	0.3968	0.1915	0.23308	0.2331	237.603	276	49.273	226.727	133.18	52.8435	1546	276	1270	746	296	0.8609
2022	08.22	C	11	700	53486	324	1747	1423	352	375	493	867	1437	0.1855	0.815	4.657	4.392	0.3816	0.7822	0.2178	0.1616	0.3959	37.6262	39.0351	0.0538	1.2737	0.2362	1.0374	0.6416	0.226	0.8145	0.6184	0.5037	0.3523	0.1774	0.217862	0.2178	254.377	324	60.0893	263.911	163.206	57.4928	1747	324	1423	880	310	0.7851
2022	08.22	C	11	600	43326	311	1480	1169	338	359	469	828	1232	0.2101	0.79	3.0629	3.759	0.4423	0.7879	0.2121	0.1796	0.4505	37.1016	37.7953	0.0618	1.2897	0.271	1.0187	0.5682	0.216	0.7899	0.5577	0.4405	0.3804	0.1676	0.212149	0.2121	241.141	311	65.352	245.648	137.008	52.1135	1480	311	1169	652	248	0.7754
2022	08.22	C	11	600	51791	340	1773	1433	369	392	522	899	1474	0.1918	0.808	4.0896	4.215	0.3901	0.7913	0.2087	0.1605	0.4234	36.1808	39.266	0.0603	1.3428	0.2575	1.0853	0.6619	0.226	0.8082	0.6099	0.4929	0.3421	0.1686	0.208647	0.2087	253.202	340	65.2002	274.8	167.603	57.3378	1773	340	1433	874	299	0.7447
2022	08.22	C	12	600	50396	345	2043	1698	390	431	622	1053	1738	0.1689	0.831	3.655	4.922	0.417	0.8204	0.1796	0.2415	0.5438	29.7185	38.7572	0.0495	1.5691	0.265	1.3041	0.7604	0.234	0.8311	0.583	0.4846	0.3081	0.1493	0.179622	0.1796	219.871	345	58.2599	286.74	167.181	51.5051	2043	345	1698	990	305	0.6373
2022	08.22	C	12	600	53176	364	2304	1940	411	452	650	1155	1982	0.158	0.842	4.5073	5.33	0.4077	0.834	0.166	0.2113	0.4914	27.4495	33.0829	0.0457	1.4314	0.2261	1.2052	0.7138	0.2	0.842	0.5923	0.4987	0.2802	0.1398	0.165962	0.166	254.296	364	57.5069	306.493	181.526	50.8715	2304	364	1940	1149	322	0.6986
2022	08.22	C	12	600	52184	353	2310	1957	403	448	657	1163	2006	0.1528	0.847	4.4302	5.544	0.4139	0.8447	0.1553	0.2299	0.5178	26.7048	33.4085	0.0445	1.4767	0.2257	1.251	0.7332	0.194	0.8472	0.5861	0.4965	0.265	0.1316	0.155316	0.1553	239.047	353	53.9433	299.057	175.278	46.4554	2310	353	1957	1147	304	0.6772
2022	08.22	C	12	700	56536	323	1841	1518	348	382	510	892	1515	0.1754	0.825	4.9165	4.7	0.3748	0.7852	0.2148	0.224	0.4106	37.2834	40.8436	0.0533	1.3286	0.2331	1.0955	0.6849	0.235	0.8246	0.6252	0.5155	0.3435	0.1771	0.214756	0.2148	243.113	323	56.6697	266.33	166.5	57.1961	1841	323	1518	949	326	0.7527
2022	08.22	C	12	600	53133	333	2155	1822	378	415	602	1063	1852	0.1545	0.845	4.6948	5.471	0.4007	0.8337	0.1663	0.2031	0.4921	29.2011	35.8681	0.0487	1.4528	0.2245	1.2283	0.7362	0.204	0.8455	0.5993	0.5067	0.2775	0.1406	0.166306	0.1663	229.213	333	51.4566	281.543	168.741	46.8209	2155	333	1822	1092	303	0.6883
2022	08.22	C	12	600	52369	331	1913	1582	361	389	521	913	1606	0.173	0.827	5.2006	4.779	0.3679	0.8059	0.1941	0.177	0.4003	33.1425	36.0658	0.0552	1.3159	0.2277	1.0882	0.6879	0.211	0.827	0.6321	0.5227	0.307	0.1605	0.194055	0.1941	251.539	331	57.2718	273.728	173.027	53.1192	1913	331	1582	1000	307	0.7599
2022	08.22	C	12	600	55749	337	1819	1482	368	392	527	907	1491	0.1853	0.815	4.2995	4.398	0.3846	0.7787	0.2213	0.1619	0.4274	37.6568	41.8409	0.0628	1.3638	0.2527	1.1111	0.6838	0.246	0.8147	0.6154	0.5014	0.3596	0.1803	0.221298	0.2213	247.104	337	62.4349	274.565	168.963	60.7675	1819	337	1482	912	328	0.7333
2022	08.22	C	12	600	53686	323	1743	1420	354	381	511	872	1431	0.1853	0.815	4.1484	4.396	0.3866	0.7803	0.2197	0.1901	0.4413	37.8462	43.2002	0.0631	1.4011	0.2596	1.1415	0.7002	0.251	0.8147	0.6134	0.4997	0.3582	0.179	0.21972	0.2197	230.533	323	59.856	263.144	161.407	57.8176	1743	323	1420	871	312	0.7137
2022	08.22	C	12	600	54196	322	1687	1365	349	371	483	835	1364	0.1909	0.809	4.5378	4.239	0.3758	0.7634	0.2366	0.1612	0.3932	39.7437	41.5772	0.0662	1.2929	0.2468	1.0461	0.653	0.248	0.8091	0.6242	0.505	0.3791	0.1915	0.236634	0.2366	249.053	322	61.4606	260.539	162.622	61.6515	1687	322	1365	852	323	0.7734
2022	08.22	C	13	700	48100	385	1821	1436	426	465	623	984	1534	0.2114	0.789	2.586	3.73	0.4171	0.8001	0.1999	0.2716	0.5525	33.535	44.4148	0.0479	1.6795	0.3551	1.3244	0.772	0.265	0.7886	0.5829	0.4596	0.3429	0.1576	0.199876	0.1999	229.235	385	81.3976	303.602	176.96	60.6782	1821	385	1436	837	287	0.5954
2022	08.22	C	13	700	63862	363	1765	1402	388	412	516	844	1413	0.2057	0.794	4.6169	3.862	0.3431	0.7489	0.2511	0.1712	0.3638	45.5904	48.3391	0.0651	1.3348	0.2745	1.0603	0.6965	0.266	0.7943	0.6569	0.5218	0.3822	0.1994	0.251067	0.2511	271.951	363	74.6567	288.343	189.418	72.3943	1765	363	1402	921	352	0.7492
2022	08.22	C	13	700	44834	340	1675	1335	385	427	614	999	1418	0.203	0.797	1.9302	3.926	0.4936	0.8075	0.1925	0.3146	0.6841	33.6222	46.5983	0.048	1.7389	0.353	1.3859	0.7018	0.267	0.797	0.5064	0.4036	0.3802	0.1534	0.192533	0.1925	195.526	340	69.0149	270.985	137.218	52.1672	1675	340	1335	676	257	0.5751
2022	08.22	C	13	700	52220	311	1656	1345	335	357	464	794	1340	0.1878	0.812	4.9474	4.325	0.3591	0.7651	0.2349	0.1636	0.3792	38.8646	41.0371	0.0555	1.3001	0.2442	1.0559	0.6767	0.248	0.8122	0.6409	0.5205	0.3666	0.1908	0.234954	0.2349	239.212	311	58.4064	252.594	161.885	59.3454	1656	311	1345	862	316	0.7692
2022	08.22	C	13	600	37060	379	1406	1027	404	426	524	793	1091	0.2696	0.73	2.0919	2.71	0.4031	0.6933	0.3067	0.2142	0.4706	36.1254	42.1754	0.0602	1.5983	0.4308	1.1675	0.6968	0.358	0.7304	0.5969	0.436	0.5139	0.224	0.306747	0.3067	237.127	379	102.163	276.837	165.24	84.9111	1406	379	1027	613	315	0.6257
2022	08.22	C	13	600	38866	366	1443	1077	395	422	535	795	1088	0.2536	0.746	2.1053	2.943	0.3983	0.6704	0.3296	0.2507	0.5231	36.1268	47.4393	0.0602	1.7594	0.4462	1.3131	0.7901	0.433	0.7464	0.6017	0.4491	0.5478	0.246	0.329611	0.3296	208.025	366	92.8316	273.168	164.358	90.0416	1443	366	1077	648	355	0.5684
2022	08.22	C	13	600	45483	310	1432	1122	335	357	468	812	1149	0.2165	0.784	2.782	3.619	0.4474	0.7478	0.2522	0.1961	0.4694	40.5771	42.5709	0.0676	1.339	0.2899	1.0491	0.5797	0.265	0.7835	0.5526	0.433	0.4565	0.1976	0.252262	0.2522	231.516	310	67.1089	242.891	134.218	61.264	1432	310	1122	620	283	0.7468
2022	08.22	C	13	700	58837	356	1591	1235	379	400	504	862	1275	0.2238	0.776	3.316	3.469	0.4097	0.7441	0.2559	0.17	0.3995	47.6809	46.4874	0.0681	1.256	0.281	0.975	0.5755	0.249	0.7762	0.5903	0.4582	0.4335	0.1986	0.255895	0.2559	283.439	356	79.6581	276.342	163.12	70.7077	1591	356	1235	729	316	0.7962
2022	08.22	C	13	800	59653	312	1666	1354	340	364	473	831	1353	0.1873	0.813	4.5731	4.34	0.3833	0.7688	0.2312	0.1773	0.3964	44.0963	45.5973	0.0551	1.2723	0.2383	1.034	0.6377	0.239	0.8127	0.6167	0.5012	0.3749	0.1879	0.231201	0.2312	245.225	312	58.4298	253.57	156.375	58.617	1666	312	1354	835	313	0.786
2022	08.22	C	14	600	54127	329	1781	1452	358	384	496	844	1454	0.1847	0.815	5.047	4.413	0.3547	0.7748	0.2252	0.1791	0.3834	37.3169	40.3361	0.0622	1.3258	0.2449	1.0809	0.6975	0.243	0.8153	0.6453	0.5261	0.349	0.1836	0.22521	0.2252	248.152	329	60.7754	268.225	173.09	60.406	1781	329	1452	937	327	0.7542
2022	08.22	C	14	600	48484	376	2027	1651	427	473	682	1107	1767	0.1855	0.815	2.6882	4.391	0.4428	0.8425	0.1575	0.2786	0.6178	29.4055	41.0309	0.049	1.7131	0.3178	1.3953	0.7775	0.22	0.8145	0.5572	0.4539	0.2826	0.1283	0.157465	0.1575	219.485	376	69.7464	306.254	170.656	48.2289	2027	376	1651	920	260	0.5837
2022	08.22	C	14	700	58302	319	1885	1566	353	384	527	907	1547	0.1692	0.831	4.794	4.909	0.3755	0.7842	0.2158	0.198	0.4427	37.2693	43.9457	0.0532	1.4193	0.2402	1.1791	0.7364	0.255	0.8308	0.6245	0.5188	0.3456	0.1793	0.215827	0.2158	224.759	319	53.9846	265.015	165.508	57.2	1885	319	1566	978	338	0.7046
2022	08.22	C	14	800	49482	324	1520	1196	351	377	489	821	1211	0.2132	0.787	3.0761	3.691	0.4156	0.7416	0.2584	0.2174	0.4599	41.4126	45.8288	0.0518	1.4064	0.2998	1.1066	0.6468	0.286	0.7868	0.5844	0.4599	0.4421	0.2033	0.258363	0.2584	230.375	324	69.0632	254.937	148.997	65.8658	1520	324	1196	699	309	0.711
2022	08.22	C	14	600	45804	450	1602	1152	474	496	590	855	1310	0.2809	0.719	2.4556	2.56	0.3516	0.7465	0.2535	0.191	0.4051	39.7999	45.86	0.0663	1.6024	0.4501	1.1523	0.7472	0.292	0.7191	0.6484	0.4663	0.3909	0.1823	0.25346	0.2535	280.829	450	126.404	323.596	209.832	82.0225	1602	450	1152	747	292	0.6241
2022	08.22	C	14	600	53072	434	1807	1373	464	489	590	860	1447	0.2402	0.76	3.648	3.164	0.3103	0.7378	0.2622	0.1821	0.3787	38.6937	47.2317	0.0645	1.6065	0.3858	1.2207	0.8419	0.32	0.7598	0.6897	0.5241	0.3801	0.1992	0.262155	0.2622	270.153	434	104.237	329.763	227.448	86.4638	1807	434	1373	947	360	0.6225
2022	08.22	C	14	600	52647	553	1925	1372	584	614	735	1025	1545	0.2873	0.713	2.1861	2.481	0.344	0.723	0.277	0.2187	0.4422	38.4121	49.3714	0.064	1.8034	0.5181	1.2853	0.8431	0.356	0.7127	0.656	0.4675	0.4222	0.1974	0.276963	0.277	306.643	553	158.862	394.138	258.546	109.164	1925	553	1372	900	380	0.5545
2022	08.22	C	14	700	60000	450	2056	1606	475	498	606	963	1706	0.2189	0.781	4.883	3.569	0.3194	0.7821	0.2179	0.1432	0.3238	37.3996	37.9099	0.0534	1.2977	0.284	1.0136	0.6899	0.221	0.7811	0.6806	0.5316	0.3202	0.1702	0.217928	0.2179	346.767	450	98.4922	351.508	239.227	76.6051	2056	450	1606	1093	350	0.7706
2022	08.22	C	14	700	63929	326	1801	1475	351	373	477	832	1441	0.181	0.819	5.9448	4.525	0.3431	0.7559	0.2441	0.1492	0.3412	43.3815	43.1529	0.062	1.2146	0.2199	0.9947	0.6535	0.243	0.819	0.6569	0.538	0.3715	0.1999	0.244038	0.2441	268.401	326	59.0094	266.991	175.399	65.1638	1801	326	1475	969	360	0.8233
2022	08.22	C	15	600	57534	334	1716	1382	360	378	485	834	1369	0.1946	0.805	4.8661	4.138	0.3618	0.7489	0.2511	0.1302	0.3642	41.6704	41.9482	0.0695	1.25	0.2433	1.0067	0.6425	0.253	0.8054	0.6382	0.514	0.3934	0.2022	0.251068	0.2511	267.2	334	65.0093	268.991	171.671	67.5396	1716	334	1382	882	347	0.8
2022	08.22	C	15	600	52509	374	2091	1717	415	454	626	1039	1795	0.1789	0.821	3.9343	4.591	0.3873	0.8276	0.1724	0.2271	0.4892	30.6211	38.6792	0.051	1.5383	0.2751	1.2632	0.7739	0.218	0.8211	0.6127	0.5031	0.2814	0.1416	0.172414	0.1724	243.126	374	66.8943	307.106	188.163	52.9431	2091	374	1717	1052	296	0.6501
2022	08.22	C	15	600	58837	352	2313	1961	393	430	608	1091	1972	0.1522	0.848	5.6365	5.571	0.3768	0.8261	0.1739	0.1887	0.4352	30.0431	34.6912	0.0501	1.362	0.2073	1.1547	0.7196	0.201	0.8478	0.6232	0.5283	0.2791	0.1474	0.173935	0.1739	258.443	352	53.5685	298.432	185.968	51.8945	2313	352	1961	1222	341	0.7342
2022	08.22	C	15	600	59677	296	1783	1487	318	339	441	792	1427	0.166	0.834	7.1585	5.024	0.3336	0.7606	0.2394	0.1412	0.325	40.1717	39.1459	0.067	1.1684	0.194	0.9745	0.6494	0.233	0.834	0.6664	0.5558	0.3592	0.1997	0.239371	0.2394	253.338	296	49.1397	246.86	164.518	59.1004	1783	296	1487	991	356	0.8558
2022	08.22	C	15	600	42682	249	1423	1174	272	293	389	704	1152	0.175	0.825	4.9943	4.715	0.3876	0.7692	0.2308	0.1789	0.3975	36.3953	37.3285	0.0607	1.2432	0.2175	1.0256	0.6281	0.237	0.825	0.6124	0.5053	0.3769	0.1904	0.230814	0.2308	200.29	249	43.5706	205.429	125.812	47.4202	1423	249	1174	719	271	0.8044
2022	08.22	C	15	600	53430	284	1501	1217	307	329	429	769	1187	0.1892	0.811	4.385	4.285	0.3985	0.742	0.258	0.1808	0.3972	43.9422	43.7911	0.0732	1.2291	0.2326	0.9966	0.5994	0.257	0.8108	0.6015	0.4877	0.429	0.2092	0.258044	0.258	231.063	284	53.7348	230.265	138.5	59.4111	1501	284	1217	732	314	0.8136
2022	08.22	C	15	700	52048	291	1674	1383	315	338	445	793	1358	0.1738	0.826	5.6155	4.753	0.363	0.7715	0.2285	0.1663	0.3712	37.6736	38.5242	0.0538	1.2377	0.2152	1.0226	0.6514	0.234	0.8262	0.637	0.5263	0.3587	0.1888	0.228492	0.2285	235.114	291	50.586	240.414	153.149	54.9319	1674	291	1383	881	316	0.8079
2022	08.22	C	15	700	51157	308	1739	1431	340	366	499	851	1420	0.1771	0.823	4.4437	4.646	0.3795	0.7771	0.2229	0.1817	0.4449	35.7882	41.9616	0.0511	1.4249	0.2524	1.1725	0.7276	0.261	0.8229	0.6205	0.5106	0.3592	0.1834	0.222884	0.2229	216.156	308	54.5509	253.449	157.277	56.4991	1739	308	1431	888	319	0.7018
2022	08.22	C	15	600	61532	290	1573	1283	309	325	398	680	1203	0.1844	0.816	7.4592	4.424	0.304	0.7116	0.2884	0.1247	0.2806	47.9992	44.307	0.08	1.1317	0.2086	0.9231	0.6425	0.266	0.8156	0.696	0.5677	0.4143	0.2352	0.288353	0.2884	256.252	290	53.4647	236.535	164.635	68.2136	1573	290	1283	893	370	0.8836
2022	08.22	C	16	600	60396	351	2061	1710	379	402	525	918	1691	0.1703	0.83	6.6381	4.872	0.3316	0.7836	0.2164	0.1345	0.3392	35.3591	36.1698	0.0589	1.2329	0.21	1.0229	0.6837	0.221	0.8297	0.6684	0.5546	0.3237	0.1795	0.216361	0.2164	284.695	351	59.7773	291.223	194.659	63.0131	2061	351	1710	1143	370	0.8111
2022	08.22	C	16	700	54640	354	1865	1511	388	413	551	911	1519	0.1898	0.81	4.1867	4.268	0.3686	0.771	0.229	0.1655	0.4346	36.2012	42.6788	0.0517	1.4551	0.2762	1.1789	0.7443	0.27	0.8102	0.6314	0.5115	0.3627	0.1855	0.229009	0.229	243.282	354	67.1936	286.806	181.081	65.6751	1865	354	1511	954	346	0.6872
2022	08.22	C	16	600	49940	333	1579	1246	360	377	476	786	1265	0.2109	0.789	4.0934	3.742	0.3636	0.748	0.252	0.1364	0.3826	40.1199	42.2159	0.0669	1.3335	0.2812	1.0522	0.6697	0.265	0.7891	0.6364	0.5022	0.396	0.1989	0.252014	0.252	249.719	333	70.2274	262.773	167.238	66.2204	1579	333	1246	793	314	0.7499
2022	08.22	C	16	600	50606	289	1714	1425	315	331	444	787	1401	0.1686	0.831	6.1293	4.931	0.3495	0.7804	0.2196	0.1123	0.3626	35.5526	36.8853	0.0593	1.2479	0.2104	1.0375	0.6749	0.228	0.8314	0.6505	0.5408	0.3376	0.1826	0.219609	0.2196	231.589	289	48.7287	240.271	156.303	52.7754	1714	289	1425	927	313	0.8014
2022	08.22	C	16	600	58987	360	1923	1563	388	412	531	897	1563	0.1872	0.813	5.2933	4.342	0.3436	0.7697	0.2303	0.1536	0.3647	37.7793	40.1009	0.063	1.3059	0.2445	1.0615	0.6968	0.244	0.8128	0.6564	0.5335	0.3509	0.1872	0.230331	0.2303	275.672	360	67.3947	292.605	192.075	67.3947	1923	360	1563	1026	360	0.7657
2022	08.22	C	16	600	50502	309	1641	1332	338	363	477	812	1325	0.1883	0.812	4.3164	4.311	0.3776	0.7628	0.2372	0.1877	0.4204	37.9536	42.2545	0.0633	1.3716	0.2583	1.1133	0.6929	0.264	0.8117	0.6224	0.5052	0.3812	0.1926	0.237259	0.2372	225.284	309	58.1846	250.815	156.101	59.5027	1641	309	1332	829	316	0.7291
2022	08.22	C	16	600	51735	301	1716	1415	327	352	466	807	1378	0.1754	0.825	5.3389	4.701	0.3576	0.7611	0.2389	0.1767	0.3887	36.6014	39.7842	0.061	1.3182	0.2312	1.087	0.6983	0.26	0.8246	0.6424	0.5297	0.3718	0.197	0.238844	0.2389	228.342	301	52.7978	248.202	159.446	59.2879	1716	301	1415	909	338	0.7586
2022	08.22	C	16	700	56175	301	1731	1430	323	347	454	781	1377	0.1739	0.826	6.0923	4.751	0.3357	0.7524	0.2476	0.1678	0.3566	39.3229	41.7806	0.0562	1.2861	0.2236	1.0625	0.7059	0.263	0.8261	0.6643	0.5488	0.3726	0.2045	0.247518	0.2476	234.041	301	52.3403	248.66	165.194	61.5563	1731	301	1430	950	354	0.7775
2022	08.22	C	16	600	53926	305	1855	1550	333	360	483	832	1468	0.1644	0.836	6.1012	5.082	0.34	0.7503	0.2497	0.1742	0.3828	34.8301	39.2142	0.0581	1.3474	0.2215	1.1259	0.7431	0.281	0.8356	0.66	0.5515	0.3783	0.2086	0.249678	0.2497	226.362	305	50.1482	254.852	168.202	63.6307	1855	305	1550	1023	387	0.7422
2022	08.22	CS	17	500	36892	314	2058	1744	364	404	614	1079	1816	0.1526	0.847	3.8399	5.554	0.4386	0.8612	0.1388	0.2294	0.5734	21.1926	27.7028	0.0424	1.5425	0.2354	1.3072	0.7338	0.181	0.8474	0.5614	0.4757	0.2472	0.1176	0.138778	0.1388	203.566	314	47.9086	266.091	149.371	36.9232	2058	314	1744	979	242	0.6483
2022	08.22	CS	17	600	49728	341	2093	1752	390	436	650	1090	1808	0.1629	0.837	3.49	5.138	0.4275	0.8373	0.1627	0.2626	0.5879	28.4228	39.0862	0.0474	1.6428	0.2677	1.3752	0.7873	0.224	0.8371	0.5725	0.4792	0.2841	0.1362	0.162647	0.1627	207.572	341	55.5571	285.443	163.413	46.4333	2093	341	1752	1003	285	0.6087
2022	08.22	CS	17	700	50613	369	1947	1578	408	445	605	1031	1661	0.1895	0.81	3.3631	4.276	0.4195	0.8188	0.1812	0.2345	0.4985	32.1136	38.1612	0.0459	1.4662	0.2779	1.1883	0.6898	0.215	0.8105	0.5805	0.4705	0.3122	0.1469	0.181232	0.1812	251.671	369	69.9337	299.066	173.602	54.2034	1947	369	1578	916	286	0.682
2022	08.22	CS	17	600	41342	275	1626	1351	308	339	488	860	1356	0.1691	0.831	3.6698	4.913	0.433	0.8001	0.1999	0.2295	0.5255	30.6399	37.1869	0.0511	1.4607	0.247	1.2137	0.6881	0.243	0.8309	0.567	0.4711	0.3525	0.1661	0.199867	0.1999	188.266	275	46.5098	228.49	129.551	45.6642	1626	275	1351	766	270	0.6846
2022	08.22	CS	17	700	53820	332	1892	1560	375	415	601	1015	1590	0.1755	0.825	3.1577	4.699	0.4378	0.8064	0.1936	0.2564	0.5748	34.539	45.344	0.0493	1.5922	0.2794	1.3128	0.738	0.254	0.8245	0.5622	0.4635	0.3444	0.1596	0.193622	0.1936	208.517	332	58.2579	273.742	153.892	52.9937	1892	332	1560	877	302	0.628
2022	08.22	CS	17	700	52758	350	1866	1516	390	428	610	1019	1581	0.1876	0.812	2.866	4.331	0.4413	0.812	0.188	0.2507	0.5717	34.8399	45.134	0.0498	1.5946	0.2991	1.2955	0.7238	0.244	0.8124	0.5587	0.4539	0.3365	0.1527	0.188003	0.188	219.491	350	65.6484	284.352	158.869	53.4566	1866	350	1516	847	285	0.6271
2022	08.22	CS	17	800	53612	347	1724	1377	380	417	572	956	1436	0.2013	0.799	2.7047	3.968	0.4423	0.7908	0.2092	0.2687	0.5447	38.9732	47.9966	0.0487	1.5419	0.3103	1.2315	0.6869	0.258	0.7987	0.5577	0.4455	0.375	0.1671	0.209137	0.2092	225.047	347	69.8428	277.157	154.58	57.9675	1724	347	1377	768	288	0.6486
2022	08.22	CS	17	800	59525	357	1984	1627	396	427	584	998	1663	0.1799	0.82	4.0584	4.557	0.394	0.8027	0.1973	0.1905	0.4651	36.6249	43.2338	0.0458	1.4395	0.259	1.1804	0.7154	0.233	0.8201	0.606	0.497	0.3256	0.1618	0.197314	0.1973	248.003	357	64.2384	292.762	177.42	57.7606	1984	357	1627	986	321	0.6947
2022	08.22	CS	17	700	44265	368	1567	1199	402	431	569	902	1313	0.2348	0.765	2.062	3.258	0.4454	0.7882	0.2118	0.2419	0.5588	36.9578	46.3703	0.0528	1.6398	0.3851	1.2547	0.6959	0.266	0.7652	0.5546	0.4244	0.382	0.1621	0.211857	0.2118	224.418	368	86.4225	281.577	156.171	59.6503	1567	368	1199	665	254	0.6098
2022	08.22	CS	18	700	57834	314	1789	1475	348	379	522	910	1443	0.1755	0.824	4.0918	4.697	0.4041	0.7654	0.2346	0.2102	0.4701	39.249	45.6588	0.0561	1.411	0.2476	1.1633	0.6933	0.273	0.8245	0.5959	0.4913	0.3936	0.1934	0.234546	0.2346	222.537	314	55.1124	258.888	154.28	60.7289	1789	314	1475	879	346	0.7087
2022	08.22	CS	18	700	52217	351	1624	1273	385	417	551	900	1321	0.2161	0.784	2.5728	3.627	0.4313	0.762	0.238	0.2514	0.5237	41.0579	49.8578	0.0587	1.5492	0.3348	1.2143	0.6906	0.289	0.7839	0.5687	0.4458	0.4185	0.1866	0.238001	0.238	226.569	351	75.8627	275.137	156.48	65.4883	1624	351	1273	724	303	0.6455
2022	08.22	CS	18	800	63169	332	2126	1794	364	399	537	956	1774	0.1562	0.844	6.506	5.404	0.3478	0.8038	0.1962	0.1951	0.3809	35.2507	38.6025	0.0441	1.2977	0.2027	1.0951	0.7142	0.215	0.8438	0.6522	0.5503	0.3009	0.1656	0.196247	0.1962	255.837	332	51.8457	280.154	182.709	54.969	2126	332	1794	1170	352	0.7706
2022	08.22	CS	18	400	48623	394	1539	1145	420	445	545	786	1161	0.256	0.744	2.6955	2.906	0.3424	0.6699	0.3301	0.2183	0.4396	42.5051	54.5771	0.1063	1.7258	0.4418	1.284	0.8444	0.424	0.744	0.6576	0.4893	0.502	0.2456	0.330115	0.3301	228.3	394	100.868	293.132	192.776	96.7719	1539	394	1145	753	378	0.5794
2022	08.22	CS	18	900	75976	414	1728	1314	441	465	572	897	1401	0.2396	0.76	3.1734	3.174	0.3676	0.7511	0.2489	0.1826	0.4008	57.8597	63.0906	0.0643	1.434	0.3436	1.0904	0.6896	0.271	0.7604	0.6324	0.4809	0.3935	0.1892	0.248849	0.2489	288.703	414	99.1875	314.812	199.094	78.3438	1728	414	1314	831	327	0.6974
2022	08.22	CS	18	700	50261	366	1589	1223	397	426	558	913	1291	0.2303	0.77	2.2638	3.342	0.4473	0.7563	0.2437	0.2371	0.5233	41.1356	48.1294	0.0588	1.5202	0.3501	1.17	0.6467	0.285	0.7697	0.5527	0.4254	0.4408	0.1875	0.24363	0.2437	240.758	366	84.3021	281.698	155.706	68.6394	1589	366	1223	676	298	0.6578
2022	08.22	CS	18	600	45039	353	1485	1132	392	426	580	915	1232	0.2377	0.762	1.5345	3.207	0.4965	0.7765	0.2235	0.3004	0.6684	39.8257	53.6206	0.0664	1.7662	0.4199	1.3464	0.6779	0.301	0.7623	0.5035	0.3838	0.4439	0.1704	0.223504	0.2235	199.864	353	83.9118	269.088	135.495	60.1407	1485	353	1132	570	253	0.5662
2022	08.22	CS	18	500	32712	418	1471	1053	444	471	569	815	1197	0.2842	0.716	1.9586	2.519	0.377	0.7398	0.2602	0.2564	0.478	31.1049	39.4361	0.0622	1.7711	0.5033	1.2678	0.7898	0.33	0.7158	0.623	0.446	0.4177	0.1863	0.260227	0.2602	236.012	418	118.779	299.221	186.409	77.86	1471	418	1053	656	274	0.5646
2022	08.22	CS	18	800	42384	405	1459	1054	433	460	575	876	1191	0.2776	0.722	1.6119	2.602	0.4469	0.7457	0.2543	0.2562	0.5376	40.2519	48.4276	0.0503	1.6654	0.4623	1.2031	0.6655	0.306	0.7224	0.5531	0.3996	0.4597	0.1837	0.25426	0.2543	243.185	405	112.423	292.577	161.833	74.3934	1459	405	1054	583	268	0.6005
2022	08.22	CS	19	600	55559	356	2506	2150	400	443	649	1227	2154	0.1421	0.858	5.6544	6.039	0.4051	0.8363	0.1637	0.2	0.4543	25.8808	29.0205	0.0431	1.307	0.1857	1.1213	0.6671	0.184	0.8579	0.5949	0.5104	0.2752	0.1405	0.163716	0.1637	272.379	356	50.573	305.427	181.694	50.0048	2506	356	2150	1279	352	0.7651
2022	08.22	CS	19	600	55469	361	2299	1938	407	447	644	1166	1968	0.157	0.843	4.5294	5.368	0.4154	0.8292	0.1708	0.2064	0.4868	28.6612	33.5864	0.0478	1.3901	0.2183	1.1718	0.6851	0.2	0.843	0.5846	0.4928	0.2921	0.144	0.170762	0.1708	259.694	361	56.686	304.314	177.909	51.9752	2299	361	1938	1133	331	0.7194
2022	08.22	CS	19	700	55779	360	2156	1796	399	434	599	1065	1828	0.167	0.833	4.7427	4.989	0.3925	0.8174	0.1826	0.1949	0.4436	31.0969	35.1402	0.0444	1.3565	0.2265	1.13	0.6864	0.206	0.833	0.6075	0.506	0.3006	0.1521	0.182614	0.1826	265.389	360	60.1113	299.889	182.171	54.7681	2156	360	1796	1091	328	0.7372
2022	08.22	CS	19	700	57916	331	1852	1521	359	382	502	895	1514	0.1787	0.821	5.2801	4.595	0.3708	0.7778	0.2222	0.1512	0.3748	38.1173	38.5228	0.0545	1.2306	0.2199	1.0106	0.6359	0.225	0.8213	0.6292	0.5167	0.3532	0.1825	0.222233	0.2222	268.974	331	59.1582	271.842	171.041	60.4093	1852	331	1521	957	338	0.8126
2022	08.22	CS	19	700	53123	327	1841	1514	355	379	498	892	1530	0.1776	0.822	5.2828	4.63	0.3732	0.7946	0.2054	0.1585	0.3765	35.1271	35.438	0.0502	1.2267	0.2179	1.0088	0.6324	0.207	0.8224	0.6268	0.5155	0.3277	0.1689	0.205402	0.2054	266.569	327	58.082	268.918	168.562	55.2401	1841	327	1514	949	311	0.8152
2022	08.22	CS	19	600	54735	347	1981	1634	376	402	531	947	1662	0.1752	0.825	5.4567	4.709	0.3672	0.8048	0.1952	0.1591	0.3754	33.5368	34.2821	0.0559	1.2393	0.2171	1.0222	0.6469	0.2	0.8248	0.6328	0.522	0.3085	0.161	0.195219	0.1952	279.997	347	60.7819	286.218	181.12	55.8773	1981	347	1634	1034	319	0.8069
2022	08.22	CS	19	700	48078	322	1719	1397	349	374	496	867	1421	0.1873	0.813	4.3161	4.339	0.3901	0.7867	0.2133	0.179	0.4152	34.4544	36.6671	0.0492	1.3095	0.2453	1.0642	0.649	0.227	0.8127	0.6099	0.4956	0.3498	0.1734	0.213343	0.2133	245.895	322	60.3165	261.683	159.595	55.8208	1719	322	1397	852	298	0.7636
2022	08.22	CS	19	600	56092	329	1999	1670	359	391	537	973	1681	0.1646	0.835	5.2294	5.076	0.3856	0.8096	0.1904	0.1916	0.4152	33.6277	36.2038	0.056	1.2887	0.2121	1.0766	0.6614	0.205	0.8354	0.6144	0.5133	0.3099	0.1591	0.190403	0.1904	255.296	329	54.1476	274.852	168.861	52.3372	1999	329	1670	1026	318	0.776
2022	08.22	CS	19	600	53066	346	1894	1548	385	418	588	988	1587	0.1827	0.817	3.4225	4.474	0.4147	0.8017	0.1983	0.2132	0.5211	34.3198	43.1225	0.0572	1.5373	0.2808	1.2565	0.7354	0.249	0.8173	0.5853	0.4784	0.3389	0.1621	0.198358	0.1983	225.07	346	63.208	282.792	165.51	56.0834	1894	346	1548	906	307	0.6505
2022	08.22	CS	20	700	53516	360	2186	1826	408	450	645	1081	1874	0.1647	0.835	4.1068	5.072	0.3949	0.8291	0.1709	0.23	0.5203	29.347	38.668	0.0419	1.5774	0.2598	1.3176	0.7974	0.225	0.8353	0.6051	0.5055	0.2824	0.1427	0.17088	0.1709	228.224	360	59.2864	300.714	181.976	51.3815	2186	360	1826	1105	312	0.634
2022	08.22	CS	20	700	56387	357	2026	1669	389	418	549	935	1664	0.1762	0.824	5.471	4.675	0.3463	0.7831	0.2169	0.1738	0.3835	33.8245	37.4528	0.0483	1.3441	0.2368	1.1073	0.7238	0.24	0.8238	0.6537	0.5385	0.3318	0.1787	0.216898	0.2169	265.605	357	62.9067	294.093	192.244	63.7878	2026	357	1669	1091	362	0.744
2022	08.22	CS	20	800	44739	341	1451	1110	371	397	516	820	1193	0.235	0.765	2.2447	3.255	0.4315	0.7676	0.2324	0.2342	0.5255	40.3444	49.132	0.0504	1.5919	0.3741	1.2178	0.6923	0.283	0.765	0.5685	0.4349	0.4089	0.1778	0.23246	0.2324	214.209	341	80.1385	260.861	148.292	60.6327	1451	341	1110	631	258	0.6282
2022	08.22	CS	20	700	44250	363	1737	1374	410	453	643	1010	1488	0.209	0.791	1.9435	3.785	0.4709	0.8188	0.1812	0.313	0.6793	32.2446	46.5147	0.0461	1.8237	0.3811	1.4426	0.7633	0.261	0.791	0.5291	0.4185	0.3425	0.1434	0.181217	0.1812	199.046	363	75.8601	287.14	151.929	52.0363	1737	363	1374	727	249	0.5483
2022	08.22	CS	20	700	52970	340	1721	1381	371	399	537	921	1432	0.1976	0.802	3.309	4.062	0.4207	0.7907	0.2093	0.2028	0.4755	38.3955	43.3959	0.0549	1.4085	0.2783	1.1302	0.6547	0.237	0.8024	0.5793	0.4648	0.3613	0.1679	0.209301	0.2093	241.392	340	67.1702	272.83	158.048	57.0947	1721	340	1381	800	289	0.71
2022	08.22	CS	20	800	52813	307	1830	1523	340	365	504	888	1537	0.1678	0.832	4.9355	4.961	0.3815	0.8076	0.1924	0.1641	0.4312	34.716	39.2373	0.0434	1.3581	0.2278	1.1302	0.6991	0.217	0.8322	0.6185	0.5148	0.311	0.1601	0.192354	0.1924	226.051	307	51.5022	255.498	158.03	49.1536	1830	307	1523	942	293	0.7363
2022	08.22	CS	20	700	48302	339	1833	1494	377	414	570	947	1548	0.1849	0.815	3.4443	4.407	0.407	0.8092	0.1908	0.2477	0.5154	32.3699	40.9947	0.0462	1.5538	0.2874	1.2664	0.7511	0.242	0.8151	0.593	0.4834	0.3217	0.1555	0.190768	0.1908	218.175	339	62.6956	276.304	163.859	52.7087	1833	339	1494	886	285	0.6436
2022	08.22	CS	20	700	48411	322	1714	1392	354	384	523	882	1431	0.1879	0.812	3.6331	4.323	0.4023	0.7967	0.2033	0.2155	0.4813	34.8174	41.6565	0.0497	1.4732	0.2768	1.1964	0.7151	0.243	0.8121	0.5977	0.4854	0.3401	0.1651	0.203278	0.2033	218.572	322	60.4924	261.508	156.303	53.1657	1714	322	1392	832	283	0.6788
2022	08.22	CS	20	600	45179	338	1649	1311	372	404	552	912	1377	0.205	0.795	2.655	3.879	0.4378	0.7925	0.2075	0.2441	0.5441	34.5006	42.8753	0.0575	1.5631	0.3204	1.2427	0.6986	0.258	0.795	0.5622	0.4469	0.3691	0.1649	0.207508	0.2075	216.237	338	69.2808	268.719	151.065	55.7526	1649	338	1311	737	272	0.6397
2022	08.22	CS	21	700	52181	290	1547	1257	317	341	444	768	1252	0.1875	0.813	4.4539	4.334	0.3803	0.7653	0.2347	0.1909	0.4084	41.5517	44.6231	0.0594	1.3217	0.2478	1.0739	0.6655	0.252	0.8125	0.6197	0.5036	0.3787	0.1907	0.23468	0.2347	219.414	290	54.3633	235.637	146.031	55.3006	1547	290	1257	779	295	0.7566
2022	08.22	CS	21	600	42833	280	1544	1264	317	348	500	860	1279	0.1813	0.819	2.8725	4.514	0.4589	0.7903	0.2097	0.2453	0.5802	33.9259	42.8948	0.0565	1.5444	0.2801	1.2644	0.6842	0.265	0.8187	0.5411	0.443	0.3874	0.1716	0.209622	0.2097	181.3	280	50.7772	229.223	124.041	48.057	1544	280	1264	684	265	0.6475
2022	08.22	CS	21	700	52065	319	1989	1670	362	399	576	998	1698	0.1604	0.84	4.2373	5.235	0.4066	0.8257	0.1743	0.2216	0.513	31.2161	39.3841	0.0446	1.5027	0.241	1.2617	0.7487	0.22	0.8396	0.5934	0.4982	0.2936	0.1463	0.174222	0.1743	212.285	319	51.1619	267.838	158.939	46.6712	1989	319	1670	991	291	0.6655
2022	08.22	CS	21	800	56434	329	1648	1319	359	385	503	862	1333	0.1996	0.8	3.6237	4.009	0.4041	0.7612	0.2388	0.1971	0.4397	42.8248	46.6011	0.0535	1.3596	0.2714	1.0882	0.6485	0.26	0.8004	0.5959	0.4769	0.4008	0.1911	0.238837	0.2388	241.983	329	65.6802	263.32	156.914	62.8853	1648	329	1319	786	315	0.7355
2022	08.22	CS	21	700	60643	329	1941	1612	362	391	524	929	1606	0.1695	0.83	5.2795	4.9	0.3722	0.7922	0.2078	0.1799	0.4032	37.6589	40.7972	0.0538	1.3044	0.2211	1.0833	0.6801	0.225	0.8305	0.6278	0.5214	0.331	0.1726	0.207802	0.2078	252.223	329	55.7656	273.234	171.534	56.7826	1941	329	1612	1012	335	0.7666
2022	08.22	CS	21	800	58577	335	1809	1474	366	395	530	920	1488	0.1852	0.815	4.0862	4.4	0.3969	0.7822	0.2178	0.1967	0.441	39.7793	44.1992	0.0497	1.3636	0.2525	1.1111	0.6701	0.242	0.8148	0.6031	0.4914	0.3611	0.1774	0.217779	0.2178	245.673	335	62.037	272.963	164.63	59.4444	1809	335	1474	889	321	0.7333
2022	08.22	CS	21	700	36793	338	1417	1079	375	407	568	898	1197	0.2385	0.761	1.3713	3.192	0.519	0.7961	0.2039	0.2966	0.7105	34.1383	46.737	0.0488	1.7979	0.4289	1.369	0.6585	0.279	0.7615	0.481	0.3663	0.4239	0.1553	0.203896	0.2039	187.997	338	80.6239	257.376	123.798	52.4771	1417	338	1079	519	220	0.5562
2022	08.22	CS	21	800	59893	309	1701	1392	338	362	489	869	1380	0.1817	0.818	4.26	4.505	0.4023	0.7694	0.2306	0.1724	0.431	43.0663	46.1424	0.0538	1.3093	0.2378	1.0714	0.6404	0.247	0.8183	0.5977	0.4891	0.3858	0.1887	0.230593	0.2306	236.004	309	56.1323	252.868	151.139	58.3122	1701	309	1392	832	321	0.7638
2022	08.22	CS	21	800	57878	305	1671	1366	333	358	485	854	1355	0.1825	0.817	4.1545	4.479	0.4019	0.7687	0.2313	0.183	0.4392	42.4099	46.3496	0.053	1.3369	0.244	1.0929	0.6537	0.253	0.8175	0.5981	0.4889	0.3868	0.1891	0.231345	0.2313	228.14	305	55.6703	249.33	149.123	57.678	1671	305	1366	817	316	0.748
2022	08.22	CS	22	700	42673	368	1367	999	392	413	505	793	1137	0.2692	0.731	2.078	2.715	0.4254	0.7698	0.2302	0.2102	0.4571	42.7551	45.9408	0.0611	1.4703	0.3958	1.0745	0.6174	0.247	0.7308	0.5746	0.4199	0.4007	0.1683	0.230242	0.2302	250.289	368	99.0666	268.933	154.522	61.9166	1367	368	999	574	230	0.6801
2022	08.22	CS	22	700	52445	348	1662	1314	380	411	557	926	1382	0.2094	0.791	2.6282	3.776	0.4399	0.7869	0.2131	0.2359	0.5302	39.952	48.1543	0.0571	1.5245	0.3192	1.2053	0.6751	0.257	0.7906	0.5601	0.4428	0.3804	0.1685	0.213062	0.2131	228.272	348	72.8664	275.134	154.108	58.6282	1662	348	1314	736	280	0.6559
2022	08.22	CS	22	500	44027	421	1760	1339	458	492	644	974	1456	0.2392	0.761	2.1322	3.181	0.413	0.773	0.227	0.2539	0.5551	32.9198	44.2503	0.0658	1.7668	0.4226	1.3442	0.789	0.305	0.7608	0.587	0.4466	0.3868	0.1727	0.227052	0.227	238.284	421	100.705	320.295	188.015	72.7182	1760	421	1339	786	304	0.566
2022	08.22	CS	22	600	30799	282	1217	935	308	330	452	757	1032	0.2317	0.768	1.7232	3.316	0.508	0.8021	0.1979	0.2353	0.6061	32.9787	39.343	0.055	1.5528	0.3598	1.193	0.5869	0.236	0.7683	0.492	0.378	0.4022	0.152	0.197882	0.1979	181.607	282	65.3443	216.656	106.59	42.8677	1217	282	935	460	185	0.644
2022	08.22	CS	22	700	34607	334	1283	949	361	387	507	817	1100	0.2603	0.74	1.4153	2.841	0.509	0.8072	0.1928	0.274	0.6077	36.5063	43.5859	0.0522	1.6141	0.4202	1.1939	0.5863	0.23	0.7397	0.491	0.3632	0.3927	0.1426	0.192816	0.1928	206.926	334	86.9493	247.051	121.312	47.6399	1283	334	949	466	183	0.6195
2022	08.22	CS	22	700	50594	331	1543	1212	359	384	499	837	1259	0.2145	0.785	3.0217	3.662	0.4175	0.7657	0.2343	0.2063	0.462	41.7832	46.2423	0.0597	1.409	0.3022	1.1067	0.6447	0.259	0.7855	0.5825	0.4576	0.4023	0.1841	0.23434	0.2343	234.918	331	71.0052	259.995	151.449	60.9229	1543	331	1212	706	284	0.7097
2022	08.22	CS	22	600	33984	350	1324	974	381	411	545	859	1134	0.2644	0.736	1.2205	2.783	0.5226	0.8049	0.1951	0.308	0.6674	34.9298	44.6058	0.0582	1.7359	0.4589	1.277	0.6097	0.249	0.7356	0.4774	0.3512	0.4086	0.1435	0.195066	0.1951	201.625	350	92.5227	257.477	122.923	50.2266	1324	350	974	465	190	0.5761
2022	08.22	CS	22	700	33146	403	1457	1054	426	452	538	756	1275	0.2766	0.723	2.4561	2.615	0.3349	0.8273	0.1727	0.2467	0.4269	31.4873	40.1396	0.045	1.7622	0.4874	1.2748	0.8478	0.22	0.7234	0.6651	0.4811	0.2596	0.1249	0.17266	0.1727	228.691	403	111.468	291.532	193.894	50.3404	1457	403	1054	701	182	0.5675
2022	08.22	CS	22	700	38777	331	1421	1090	356	378	478	771	1198	0.2329	0.767	2.7923	3.293	0.4037	0.7954	0.2046	0.2018	0.4495	35.6146	39.6617	0.0509	1.4518	0.3382	1.1136	0.6641	0.228	0.7671	0.5963	0.4574	0.3431	0.1569	0.204591	0.2046	227.993	331	77.1013	253.899	151.407	51.9444	1421	331	1090	650	223	0.6888
2022	08.22	CS	23	700	56001	381	2102	1721	418	453	613	1050	1789	0.1813	0.819	4.1925	4.517	0.3887	0.8181	0.1819	0.2034	0.4494	32.5791	37.6599	0.0465	1.4119	0.2559	1.156	0.7066	0.21	0.8187	0.6113	0.5005	0.2975	0.1489	0.181862	0.1819	269.849	381	69.0585	311.942	190.681	56.7331	2102	381	1721	1052	313	0.7083
2022	08.22	CS	23	600	53462	389	1687	1298	419	444	562	894	1352	0.2306	0.769	2.9421	3.337	0.3891	0.7419	0.2581	0.1926	0.4443	41.2276	47.0784	0.0687	1.4841	0.3422	1.1419	0.6976	0.295	0.7694	0.6109	0.4701	0.4224	0.1986	0.258044	0.2581	262.112	389	89.6983	299.302	182.855	77.2466	1687	389	1298	793	335	0.6738
2022	08.22	CS	23	800	65322	330	2019	1689	360	384	510	932	1656	0.1634	0.837	6.4641	5.118	0.3564	0.7851	0.2149	0.1421	0.3552	38.7144	38.5858	0.0484	1.1914	0.1947	0.9967	0.6414	0.214	0.8366	0.6436	0.5384	0.3339	0.1798	0.214898	0.2149	276.985	330	53.9376	276.062	177.667	59.3314	2019	330	1689	1087	363	0.8393
2022	08.22	CS	23	800	67120	391	1923	1532	416	443	558	950	1580	0.2033	0.797	4.5467	3.918	0.3649	0.7761	0.2239	0.1762	0.3634	43.8515	43.6685	0.0548	1.25	0.2542	0.9958	0.6325	0.223	0.7967	0.6351	0.506	0.3525	0.1784	0.223873	0.2239	312.8	391	79.5013	311.499	197.838	69.7415	1923	391	1532	973	343	0.8
2022	08.22	CS	23	700	54011	369	1995	1626	405	436	591	1018	1699	0.185	0.815	3.9514	4.407	0.3991	0.818	0.182	0.1907	0.4551	33.2566	37.9197	0.0475	1.399	0.2588	1.1402	0.6851	0.208	0.815	0.6009	0.4897	0.303	0.1484	0.182073	0.182	263.76	369	68.2511	300.749	180.708	54.7489	1995	369	1626	977	296	0.7148
2022	08.22	CS	23	700	57527	361	2005	1644	398	428	587	1014	1689	0.18	0.82	4.0934	4.554	0.3972	0.8078	0.1922	0.1825	0.4582	35.0314	40.4139	0.05	1.407	0.2533	1.1536	0.6954	0.222	0.82	0.6028	0.4943	0.3189	0.1576	0.192233	0.1922	256.574	361	64.998	296.002	178.429	56.8958	2005	361	1644	991	316	0.7107
2022	08.22	CS	23	700	56172	365	1988	1623	400	439	598	1014	1677	0.1836	0.816	3.7938	4.447	0.3999	0.8084	0.1916	0.2403	0.4785	34.6492	41.4652	0.0495	1.4658	0.2691	1.1967	0.7182	0.229	0.8164	0.6001	0.4899	0.3193	0.1564	0.191612	0.1916	249.011	365	67.0146	297.985	178.828	57.1001	1988	365	1623	974	311	0.6822
2022	08.22	CS	23	700	56931	347	1973	1626	384	418	581	1006	1661	0.1759	0.824	3.9897	4.686	0.4053	0.8081	0.1919	0.2091	0.4797	35.052	41.4879	0.0501	1.4362	0.2526	1.1836	0.7039	0.227	0.8241	0.5947	0.4901	0.3226	0.1581	0.19185	0.1919	241.61	347	61.0284	285.972	170.071	54.8728	1973	347	1626	967	312	0.6963
2022	08.22	CS	23	700	56154	334	1995	1661	370	400	555	994	1690	0.1674	0.833	4.6885	4.973	0.3974	0.8164	0.1836	0.1806	0.4435	33.8467	37.7784	0.0484	1.3406	0.2244	1.1162	0.6727	0.205	0.8326	0.6026	0.5018	0.3047	0.1529	0.183612	0.1836	249.142	334	55.9178	278.082	167.586	51.0627	1995	334	1661	1001	305	0.7459
2022	08.22	CS	24	700	60111	335	1760	1425	362	384	494	861	1417	0.1903	0.81	4.8683	4.254	0.3691	0.7593	0.2407	0.1544	0.3719	42.223	42.544	0.0603	1.2445	0.2369	1.0076	0.6357	0.243	0.8097	0.6309	0.5108	0.3815	0.1949	0.240688	0.2407	269.184	335	63.7642	271.236	171.117	65.2869	1760	335	1425	899	343	0.8035
2022	08.22	CS	24	700	57116	387	1844	1457	418	444	575	944	1511	0.2099	0.79	3.5602	3.765	0.3823	0.7714	0.2286	0.1784	0.4301	39.2407	44.1488	0.0561	1.4239	0.2988	1.1251	0.695	0.257	0.7901	0.6177	0.4881	0.37	0.1806	0.228549	0.2286	271.789	387	81.2196	305.78	188.883	69.8867	1844	387	1457	900	333	0.7023
2022	08.22	CS	24	700	51924	369	1764	1395	397	422	532	880	1434	0.2092	0.791	4.0535	3.78	0.3663	0.7634	0.2366	0.1792	0.3895	37.2606	39.6183	0.0532	1.3445	0.2813	1.0633	0.6738	0.252	0.7908	0.6337	0.5011	0.3733	0.1871	0.23656	0.2366	274.451	369	77.1888	291.811	184.918	69.0306	1764	369	1395	884	330	0.7438
2022	08.22	CS	24	700	48925	323	1739	1416	356	387	532	892	1452	0.1857	0.814	3.6166	4.384	0.4018	0.7973	0.2027	0.2189	0.492	34.5906	42.3517	0.0494	1.5037	0.2793	1.2244	0.7324	0.248	0.8143	0.5982	0.4871	0.3388	0.165	0.20267	0.2027	214.803	323	59.9937	263.006	157.321	53.3071	1739	323	1416	847	287	0.665
2022	08.22	CS	24	800	57901	371	1956	1585	400	428	553	948	1609	0.1897	0.81	4.7934	4.272	0.364	0.7811	0.2189	0.1767	0.3828	36.5704	38.4506	0.0457	1.2975	0.2461	1.0514	0.6687	0.23	0.8103	0.636	0.5153	0.3442	0.1774	0.218911	0.2189	285.934	371	70.3686	300.631	191.19	65.8165	1956	371	1585	1008	347	0.7707
2022	08.22	CS	24	700	52598	329	1702	1373	365	394	545	926	1409	0.1933	0.807	3.0237	4.173	0.4348	0.7866	0.2134	0.2112	0.5244	38.3481	46.249	0.0548	1.495	0.289	1.206	0.6816	0.257	0.8067	0.5652	0.4559	0.3776	0.1722	0.21342	0.2134	220.067	329	63.5964	265.404	150.002	56.6375	1702	329	1373	776	293	0.6689
2022	08.22	CS	24	700	54769	317	1711	1394	350	379	517	893	1420	0.1853	0.815	3.6634	4.397	0.4132	0.7912	0.2088	0.208	0.4782	39.3282	45.5187	0.0562	1.4206	0.2632	1.1574	0.6792	0.242	0.8147	0.5868	0.4781	0.3557	0.1701	0.208725	0.2088	223.145	317	58.7312	258.269	151.552	53.9141	1711	317	1394	818	291	0.7039
2022	08.22	CS	24	900	52653	864	1250	386	904	950	1047	1033	1091	0.6912	0.309	0.0409	0.447	0.4378	0.5881	0.4119	1.1917	1.5803	136.445	492.492	0.1516	11.6887	8.0792	3.6095	2.0292	1.487	0.3088	0.5622	0.1736	0.7327	0.1272	0.411924	0.4119	73.9175	864	597.197	266.803	149.99	109.901	1250	864	386	217	159	0.0856
2022	08.22	CS	21	737.5	54499.6	411.875	1715.75	1303.88	444	473.5	599.375	922.125	1417.88	0.256825	0.74325	3.4525	3.684	0.396162	0.7548	0.2452	0.314812	0.58115	50.5008	98.9216	0.0659125	2.6773	1.24673	1.43059	0.84945	0.402	0.743175	0.603838	0.45125	0.409225	0.171812	0.245181	0.2452	229.162	411.875	134.007	277.868	168.122	67.9725	1715.75	411.875	1303.88	793.625	297.875	0.642963
2022	08.22	AS	25	600	46704	402	1969	1567	450	492	689	1088	1679	0.2042	0.796	2.3807	3.898	0.4378	0.8149	0.1851	0.268	0.6105	29.8439	41.6191	0.0497	1.7523	0.3578	1.3946	0.784	0.258	0.7958	0.5622	0.4474	0.3292	0.1473	0.185076	0.1851	229.413	402	82.0741	319.926	179.869	59.2077	1969	402	1567	881	290	0.5707
2022	08.22	AS	25	600	44943	308	1697	1389	343	374	528	918	1432	0.1815	0.819	3.2676	4.51	0.4392	0.8092	0.1908	0.2232	0.528	32.3953	38.9452	0.054	1.4688	0.2666	1.2022	0.6742	0.229	0.8185	0.5608	0.459	0.3402	0.1562	0.190784	0.1908	209.695	308	55.901	252.099	141.386	48.0966	1697	308	1389	779	265	0.6808
2022	08.22	AS	25	600	48611	324	1655	1331	355	387	502	777	1392	0.1958	0.804	4.0741	4.108	0.3403	0.8024	0.1976	0.2404	0.4458	36.5612	47.8873	0.0609	1.6286	0.3188	1.3098	0.864	0.259	0.8042	0.6597	0.5305	0.2995	0.1589	0.19758	0.1976	198.944	324	63.4296	260.57	171.886	51.4876	1655	324	1331	878	263	0.614
2022	08.22	AS	25	400	32967	310	1217	907	345	377	505	722	956	0.2547	0.745	1.3838	2.926	0.4542	0.7122	0.2878	0.3528	0.7166	36.3858	57.4048	0.091	2.1169	0.5392	1.5777	0.861	0.454	0.7453	0.5458	0.4067	0.5273	0.2145	0.2878	0.2878	146.441	310	78.9647	231.035	126.089	66.4832	1217	310	907	495	261	0.4724
2022	08.22	AS	25	700	30253	312	1287	975	353	393	553	841	1104	0.2424	0.758	1.0953	3.125	0.5426	0.8123	0.1877	0.4103	0.8239	31.0675	47.1788	0.0444	2.0045	0.4859	1.5186	0.6947	0.285	0.7576	0.4574	0.3465	0.4103	0.1422	0.187671	0.1877	155.65	312	75.6364	236.364	108.121	44.3636	1287	312	975	446	183	0.4989
2022	08.22	AS	25	900	19352	284	1175	891	314	343	441	635	1099	0.2417	0.758	2.0457	3.137	0.3939	0.9147	0.0853	0.3255	0.5874	21.7581	32.4408	0.0242	1.9662	0.4752	1.491	0.9036	0.127	0.7583	0.6061	0.4596	0.1407	0.0647	0.0852783	0.0853	144.441	284	68.6434	215.357	130.519	18.3694	1175	284	891	540	76	0.5086
2022	08.22	AS	25	600	23539	285	1093	808	320	353	494	764	957	0.2608	0.739	0.8248	2.835	0.5928	0.8317	0.1683	0.4084	0.8622	29.1716	42.4277	0.0486	1.9674	0.513	1.4544	0.5922	0.245	0.7392	0.4072	0.301	0.4134	0.1244	0.168336	0.1683	144.861	285	74.3138	210.686	85.7868	35.462	1093	285	808	329	136	0.5083
2022	08.22	AS	25	600	28106	282	1055	773	316	344	462	670	881	0.2673	0.733	1.074	2.741	0.5019	0.7749	0.2251	0.3622	0.7762	36.399	56.2871	0.0607	2.1105	0.5641	1.5464	0.7702	0.348	0.7327	0.4981	0.3649	0.4519	0.1649	0.225091	0.2251	133.618	282	75.3782	206.622	102.91	46.51	1055	282	773	385	174	0.4738
2022	08.22	AS	25	600	33725	292	1305	1013	332	366	520	842	1113	0.2238	0.776	1.3671	3.469	0.5429	0.8105	0.1895	0.3356	0.7502	33.331	46.0574	0.0556	1.7801	0.3983	1.3818	0.6316	0.262	0.7762	0.4571	0.3548	0.4147	0.1471	0.189559	0.1895	164.036	292	65.3364	226.664	103.599	42.9609	1305	292	1013	463	192	0.5618
2022	08.22	AS	26	500	37552	346	1495	1149	381	421	580	908	1273	0.2314	0.769	1.6006	3.321	0.4891	0.8068	0.1932	0.3481	0.6789	32.7212	45.4138	0.0654	1.8058	0.4179	1.3879	0.709	0.268	0.7686	0.5109	0.3926	0.3782	0.1485	0.193222	0.1932	191.605	346	80.0776	265.922	135.854	51.3793	1495	346	1149	587	222	0.5538
2022	08.22	AS	26	600	43914	368	1773	1405	411	448	625	1009	1503	0.2076	0.792	2.2485	3.818	0.4562	0.8078	0.1922	0.2633	0.6097	31.2944	41.8235	0.0522	1.6865	0.35	1.3365	0.7267	0.257	0.7924	0.5438	0.4309	0.3534	0.1523	0.192179	0.1922	218.203	368	76.3813	291.619	158.574	56.0406	1773	368	1405	764	270	0.5929
2022	08.22	AS	26	600	48418	364	1601	1237	388	409	501	821	1293	0.2274	0.773	3.7373	3.398	0.3694	0.751	0.249	0.1698	0.3692	39.1809	39.1523	0.0653	1.2933	0.294	0.9993	0.6301	0.249	0.7726	0.6306	0.4872	0.3949	0.1924	0.249024	0.249	281.451	364	82.7583	281.242	177.339	70.0262	1601	364	1237	780	308	0.7732
2022	08.22	AS	26	600	51800	350	1532	1182	381	402	520	781	1203	0.2285	0.772	2.8777	3.377	0.3646	0.7217	0.2783	0.1777	0.4794	43.863	57.6698	0.0731	1.7041	0.3893	1.3148	0.8354	0.366	0.7715	0.6354	0.4902	0.4381	0.2148	0.278369	0.2783	205.387	350	79.9608	270.039	171.573	75.1632	1532	350	1182	751	329	0.5868
2022	08.22	AS	26	700	43024	335	1527	1192	361	383	492	813	1267	0.2194	0.781	3.158	3.558	0.401	0.7819	0.2181	0.1846	0.439	36.1332	39.5601	0.0516	1.4025	0.3077	1.0948	0.6558	0.239	0.7806	0.599	0.4676	0.3641	0.1703	0.218096	0.2181	238.859	335	73.4938	261.506	156.641	57.0399	1527	335	1192	714	260	0.713
2022	08.22	AS	26	600	49771	417	1570	1153	445	467	590	901	1264	0.2656	0.734	1.9631	2.765	0.4198	0.7346	0.2654	0.1908	0.5001	43.2057	51.4779	0.072	1.6224	0.4309	1.1915	0.6913	0.316	0.7344	0.5802	0.4261	0.4574	0.1949	0.265383	0.2654	257.027	417	110.757	306.243	177.69	81.2752	1570	417	1153	669	306	0.6164
2022	08.22	AS	26	500	31421	478	1602	1124	528	573	753	1020	1371	0.2984	0.702	0.8729	2.351	0.4822	0.7945	0.2055	0.4004	0.8155	27.993	47.3437	0.056	2.4105	0.7192	1.6913	0.8757	0.348	0.7016	0.5178	0.3633	0.3969	0.1442	0.205515	0.2055	198.299	478	142.624	335.376	173.655	68.9251	1602	478	1124	582	231	0.4149
2022	08.22	AS	26	700	55613	380	1865	1485	405	426	535	904	1530	0.2038	0.796	4.8231	3.908	0.3529	0.7744	0.2256	0.1414	0.3479	37.4891	36.9645	0.0536	1.2383	0.2523	0.986	0.6381	0.222	0.7962	0.6471	0.5153	0.3486	0.1796	0.225579	0.2256	306.872	380	77.4263	302.574	195.807	68.2574	1865	380	1485	961	335	0.8075
2022	08.22	AS	26	700	47515	341	1926	1585	384	424	613	1016	1637	0.1771	0.823	3.1993	4.648	0.4259	0.8177	0.1823	0.2524	0.572	30.0169	40.3189	0.0429	1.6322	0.289	1.3432	0.7712	0.245	0.8229	0.5741	0.4725	0.3176	0.1501	0.182334	0.1823	208.92	341	60.3744	280.626	161.116	51.1677	1926	341	1585	910	289	0.6127
2022	08.22	AS	27	600	43204	352	1682	1330	384	412	542	918	1424	0.2093	0.791	3.0034	3.778	0.4256	0.806	0.194	0.2105	0.4762	32.5236	36.3927	0.0542	1.4151	0.2961	1.119	0.6428	0.217	0.7907	0.5744	0.4542	0.3377	0.1534	0.193975	0.194	248.746	352	73.6647	278.335	159.886	53.9929	1682	352	1330	764	258	0.7067
2022	08.22	AS	27	600	42933	374	1858	1484	419	457	632	1020	1595	0.2013	0.799	2.5734	3.968	0.4353	0.8228	0.1772	0.2561	0.5795	28.97	38.5669	0.0483	1.6668	0.3355	1.3313	0.7518	0.236	0.7987	0.5647	0.451	0.3138	0.1416	0.177203	0.1772	224.382	374	75.2831	298.717	168.683	52.9397	1858	374	1484	838	263	0.6
2022	08.22	AS	27	600	39636	331	1555	1224	369	401	563	923	1327	0.2129	0.787	1.9823	3.698	0.4837	0.8137	0.1863	0.2614	0.6318	32.4217	42.3527	0.054	1.6596	0.3533	1.3063	0.6745	0.243	0.7871	0.5163	0.4064	0.3608	0.1466	0.186281	0.1863	199.446	331	70.4572	260.543	134.529	48.5325	1555	331	1224	632	228	0.6026
2022	08.22	AS	27	600	36831	308	1532	1224	351	389	566	919	1307	0.201	0.799	1.886	3.974	0.4992	0.8162	0.1838	0.3105	0.7026	30.1298	42.4085	0.0502	1.7617	0.3542	1.4075	0.7049	0.259	0.799	0.5008	0.4001	0.367	0.1469	0.183794	0.1838	174.831	308	61.9217	246.078	123.24	45.235	1532	308	1224	613	225	0.5676
2022	08.22	AS	27	600	46710	372	1807	1435	412	443	611	980	1531	0.2059	0.794	2.65	3.858	0.4237	0.8077	0.1923	0.216	0.5552	32.5895	42.7023	0.0543	1.65	0.3397	1.3103	0.7551	0.252	0.7941	0.5763	0.4577	0.3337	0.1527	0.192311	0.1923	225.455	372	76.5822	295.418	170.251	56.819	1807	372	1435	827	276	0.6061
2022	08.22	AS	27	600	32866	322	1311	989	364	402	570	853	1115	0.2456	0.754	1.0698	3.071	0.5369	0.8018	0.1982	0.3842	0.8359	33.2707	51.7961	0.0555	2.0637	0.5069	1.5568	0.7209	0.309	0.7544	0.4631	0.3494	0.4279	0.1495	0.19816	0.1982	156.03	322	79.0877	242.912	112.491	48.1404	1311	322	989	458	196	0.4846
2022	08.22	AS	27	600	45114	390	1756	1366	434	468	633	997	1492	0.2221	0.778	2.1276	3.503	0.4444	0.8067	0.1933	0.2489	0.593	33.0653	44.1234	0.0551	1.7154	0.381	1.3344	0.7415	0.258	0.7779	0.5556	0.4322	0.3478	0.1503	0.193238	0.1933	227.352	390	86.6173	303.383	168.571	58.6333	1756	390	1366	759	264	0.5829
2022	08.22	AS	27	600	36859	347	1452	1105	385	418	572	886	1227	0.239	0.761	1.5241	3.184	0.4878	0.7964	0.2036	0.2986	0.6787	33.3952	46.4682	0.0557	1.8284	0.437	1.3915	0.7127	0.283	0.761	0.5122	0.3898	0.3975	0.155	0.2036	0.2036	189.783	347	82.9263	264.074	135.263	53.7707	1452	347	1105	566	225	0.5469
2022	08.22	AS	27	600	40002	376	1759	1383	414	446	610	991	1504	0.2138	0.786	2.3729	3.678	0.4447	0.8156	0.1844	0.2314	0.564	28.9636	36.7343	0.0483	1.6131	0.3448	1.2683	0.7043	0.234	0.7862	0.5553	0.4366	0.332	0.145	0.18436	0.1844	233.092	376	80.3729	295.627	164.166	54.5082	1759	376	1383	768	255	0.6199
2022	08.22	AS	28	600	29059	262	1109	847	293	324	455	729	953	0.2362	0.764	1.2153	3.233	0.5514	0.8158	0.1842	0.366	0.7595	34.3466	47.3154	0.0572	1.8037	0.4261	1.3776	0.618	0.254	0.7638	0.4486	0.3427	0.4105	0.1407	0.18415	0.1842	145.257	262	61.8972	200.103	89.7746	36.8548	1109	262	847	380	156	0.5544
2022	08.22	AS	28	600	35007	308	1605	1297	348	382	550	913	1384	0.1919	0.808	2.4327	4.211	0.4665	0.8296	0.1704	0.2621	0.6219	27.0297	36.0397	0.045	1.65	0.3166	1.3333	0.7114	0.227	0.8081	0.5335	0.4312	0.3194	0.1377	0.1704	0.1704	186.667	308	59.1053	248.895	132.795	42.41	1605	308	1297	692	221	0.6061
2022	08.22	AS	28	700	47828	312	1811	1499	344	376	519	889	1528	0.1723	0.828	4.4282	4.804	0.3849	0.8112	0.1888	0.2135	0.4603	31.9458	38.2021	0.0456	1.4447	0.2489	1.1958	0.7355	0.226	0.8277	0.6151	0.5091	0.3069	0.1563	0.188774	0.1888	215.962	312	53.7515	258.248	158.843	48.7554	1811	312	1499	922	283	0.6922
2022	08.22	AS	28	500	28933	267	1332	1065	316	349	547	843	1152	0.2005	0.8	1.3924	3.989	0.5408	0.831	0.169	0.3099	0.8764	27.2056	44.0831	0.0544	2.0266	0.4062	1.6204	0.744	0.274	0.7995	0.4592	0.3671	0.3681	0.1351	0.169032	0.169	131.748	267	53.5203	213.48	98.0203	36.0811	1332	267	1065	489	180	0.4934
2022	08.22	AS	28	600	36230	286	1303	1017	321	352	502	828	1117	0.2195	0.781	1.5258	3.556	0.5329	0.8171	0.1829	0.3048	0.708	35.6635	47.3758	0.0594	1.702	0.3736	1.3284	0.6204	0.243	0.7805	0.4671	0.3645	0.3916	0.1427	0.182916	0.1829	168.038	286	62.7751	223.225	104.259	40.8258	1303	286	1017	475	186	0.5875
2022	08.22	AS	28	600	30722	285	1382	1097	327	365	549	878	1200	0.2062	0.794	1.4582	3.849	0.5406	0.8341	0.1659	0.3464	0.8022	28.0441	41.6168	0.0467	1.8695	0.3855	1.484	0.6818	0.246	0.7938	0.4594	0.3647	0.3611	0.1317	0.165889	0.1659	152.447	285	58.7735	226.226	103.936	37.5326	1382	285	1097	504	182	0.5349
2022	08.22	AS	28	600	37577	272	1409	1137	305	337	483	835	1195	0.193	0.807	2.2941	4.18	0.4952	0.8118	0.1882	0.2814	0.6186	33.0883	41.3359	0.0551	1.5481	0.2989	1.2493	0.6307	0.235	0.807	0.5048	0.4074	0.3728	0.1519	0.188189	0.1882	175.699	272	52.5082	219.492	110.808	41.3116	1409	272	1137	574	214	0.6459
2022	08.22	AS	28	600	34444	295	1359	1064	327	357	495	839	1170	0.2171	0.783	1.8355	3.607	0.5113	0.8224	0.1776	0.282	0.6266	32.4117	39.7202	0.054	1.5653	0.3398	1.2255	0.5989	0.218	0.7829	0.4887	0.3826	0.3635	0.1391	0.177642	0.1776	188.462	295	64.0361	230.964	112.877	41.0265	1359	295	1064	520	189	0.6389
2022	08.22	AS	28	600	37670	291	1515	1224	331	364	532	890	1297	0.1921	0.808	2.2032	4.206	0.4894	0.8219	0.1781	0.2696	0.6563	30.8155	41.3274	0.0514	1.66	0.3188	1.3411	0.6848	0.239	0.8079	0.5106	0.4125	0.3488	0.1439	0.178097	0.1781	175.301	291	55.895	235.105	120.049	41.8733	1515	291	1224	625	218	0.6024
2022	08.22	AS	29	290	28381	313	1685	1372	350	384	545	928	1478	0.1858	0.814	2.9115	4.383	0.4483	0.8491	0.1509	0.2478	0.5637	20.7249	26.0605	0.0715	1.5443	0.2869	1.2575	0.6938	0.19	0.8142	0.5517	0.4493	0.2734	0.1228	0.150835	0.1509	202.681	313	58.1418	254.858	140.618	38.4516	1685	313	1372	757	207	0.6475
2022	08.22	AS	29	600	44597	360	1826	1466	395	425	573	973	1562	0.1972	0.803	3.2732	4.072	0.4181	0.8199	0.1801	0.2046	0.4843	30.4604	35.2804	0.0508	1.4427	0.2844	1.1582	0.6739	0.209	0.8028	0.5819	0.4671	0.3095	0.1446	0.180098	0.1801	249.532	360	70.9748	289.025	168.171	52.0482	1826	360	1466	853	264	0.6932
2022	08.22	AS	29	600	34447	438	1702	1264	471	500	619	898	1390	0.2573	0.743	2.38	2.886	0.3639	0.7532	0.2468	0.2294	0.4773	27.2918	35.7958	0.0455	1.7661	0.4545	1.3116	0.8343	0.324	0.7427	0.6361	0.4724	0.3881	0.1833	0.24687	0.2468	248.004	438	112.717	325.283	206.905	80.2914	1702	438	1264	804	312	0.5662
2022	08.22	AS	29	600	28331	324	1223	899	360	392	535	802	1013	0.2649	0.735	1.0174	2.775	0.5317	0.7664	0.2336	0.356	0.7824	31.5524	46.4265	0.0526	2.0017	0.5303	1.4714	0.6891	0.344	0.7351	0.4683	0.3442	0.4988	0.1717	0.233588	0.2336	161.862	324	85.8348	238.165	111.532	55.6337	1223	324	899	421	210	0.4996
2022	08.22	AS	29	600	27421	350	1378	1028	387	421	572	848	1131	0.254	0.746	1.3078	2.937	0.4844	0.7597	0.2403	0.3307	0.7198	26.713	39.694	0.0445	1.9919	0.5059	1.4859	0.7661	0.357	0.746	0.5156	0.3846	0.466	0.1792	0.24027	0.2403	175.712	350	88.897	261.103	134.615	62.7358	1378	350	1028	530	247	0.502
2022	08.22	AS	29	500	22095	324	1134	810	356	386	515	785	1002	0.2857	0.714	0.8157	2.5	0.5691	0.837	0.163	0.3704	0.786	27.317	37.7263	0.0546	1.9335	0.5524	1.3811	0.595	0.225	0.7143	0.4309	0.3078	0.3782	0.1164	0.162966	0.163	167.572	324	92.5714	231.429	99.7143	37.7143	1134	324	810	349	132	0.5172
2022	08.22	AS	29	600	38757	410	1601	1191	440	468	588	882	1297	0.2561	0.744	2.1822	2.905	0.3963	0.7448	0.2552	0.2351	0.4982	32.5812	40.9566	0.0543	1.6898	0.4327	1.2571	0.7589	0.321	0.7439	0.6037	0.4491	0.4228	0.1899	0.255244	0.2552	242.632	410	104.997	305.003	184.129	77.8513	1601	410	1191	719	304	0.5918
2022	08.22	AS	29	300	24762	373	1324	951	406	435	572	855	1128	0.2817	0.718	1.079	2.55	0.5068	0.7939	0.2061	0.3049	0.6975	26.0772	35.8877	0.0869	1.916	0.5398	1.3762	0.6787	0.284	0.7183	0.4932	0.3542	0.4179	0.148	0.206108	0.2061	194.676	373	105.082	267.918	132.128	55.2175	1324	373	951	469	196	0.5219
2022	08.22	AS	29	250	19446	355	1210	855	383	410	528	770	1020	0.2934	0.707	1.0821	2.408	0.4854	0.7778	0.2222	0.3158	0.6745	22.7827	31.6579	0.0911	1.9665	0.577	1.3896	0.7151	0.309	0.7066	0.5146	0.3636	0.4318	0.157	0.222204	0.2222	180.524	355	104.153	250.847	129.091	55.7438	1210	355	855	440	190	0.5085
2022	08.22	AS	30	600	29562	344	1390	1046	377	406	546	872	1205	0.2475	0.753	1.4669	3.041	0.5048	0.8231	0.1769	0.2772	0.6437	28.3007	36.0905	0.0472	1.6946	0.4194	1.2753	0.6315	0.226	0.7525	0.4952	0.3727	0.3571	0.1331	0.176836	0.1769	202.998	344	85.1338	258.866	128.196	45.7842	1390	344	1046	518	185	0.5901
2022	08.22	AS	30	600	45416	358	1746	1388	385	418	544	915	1463	0.205	0.795	3.4425	3.877	0.4013	0.7961	0.2039	0.2378	0.4467	32.7599	36.4652	0.0546	1.4002	0.2871	1.1131	0.6664	0.227	0.795	0.5987	0.4759	0.3406	0.1621	0.203917	0.2039	255.678	358	73.4044	284.596	170.388	58.0263	1746	358	1388	831	283	0.7142
2022	08.22	AS	30	600	41252	337	1644	1307	367	395	520	881	1377	0.205	0.795	3.2139	3.878	0.4162	0.7957	0.2043	0.2142	0.4667	31.6019	35.436	0.0527	1.4104	0.2891	1.1213	0.6546	0.229	0.795	0.5838	0.4641	0.3499	0.1624	0.204272	0.2043	238.939	337	69.0809	267.919	156.406	54.7318	1644	337	1307	763	267	0.709
2022	08.22	AS	30	600	42818	372	1677	1305	402	430	554	886	1362	0.2218	0.778	2.9661	3.508	0.3939	0.7586	0.2414	0.2146	0.4649	32.8503	38.7728	0.0548	1.5167	0.3364	1.1803	0.7154	0.285	0.7782	0.6061	0.4717	0.3982	0.1878	0.241349	0.2414	245.269	372	82.5188	289.481	175.463	69.8748	1677	372	1305	791	315	0.6593
2022	08.22	AS	30	600	50996	394	2061	1667	428	463	606	967	1726	0.1912	0.809	4.4149	4.231	0.3437	0.799	0.201	0.21	0.4239	30.6309	37.7763	0.0511	1.5248	0.2915	1.2333	0.8094	0.248	0.8088	0.6563	0.5308	0.3062	0.1625	0.200959	0.201	258.395	394	75.3207	318.679	209.139	64.0417	2061	394	1667	1094	335	0.6558
2022	08.22	AS	30	700	57199	381	1951	1570	407	429	534	882	1576	0.1953	0.805	5.7922	4.121	0.3191	0.7611	0.2389	0.1401	0.3248	36.4722	37.1274	0.0521	1.265	0.247	1.018	0.6931	0.243	0.8047	0.6809	0.5479	0.3508	0.1922	0.23886	0.2389	301.186	381	74.4034	306.597	208.759	73.2317	1951	381	1570	1069	375	0.7905
2022	08.22	AS	30	400	29949	446	1528	1082	476	503	626	930	1267	0.2919	0.708	1.4268	2.426	0.4473	0.7588	0.2412	0.2495	0.5545	27.7185	34.3618	0.0693	1.7507	0.511	1.2397	0.6851	0.299	0.7081	0.5527	0.3914	0.4365	0.1708	0.241254	0.2412	254.755	446	130.181	315.819	174.547	76.1819	1528	446	1082	598	261	0.5712
2022	08.22	AS	30	700	50133	393	2002	1609	429	463	614	1011	1689	0.1963	0.804	3.6887	4.094	0.3841	0.8055	0.1945	0.2113	0.4578	31.1969	37.1873	0.0446	1.4832	0.2912	1.192	0.7342	0.232	0.8037	0.6159	0.495	0.3158	0.1563	0.194501	0.1945	264.968	393	77.1474	315.853	194.537	61.4431	2002	393	1609	991	313	0.6742
2022	08.22	AS	30	600	29180	357	1397	1040	386	413	532	798	1079	0.2555	0.744	1.8558	2.913	0.424	0.6942	0.3058	0.2596	0.5609	28.0965	37.1647	0.0468	1.7768	0.4541	1.3228	0.7619	0.404	0.7445	0.576	0.4288	0.5309	0.2276	0.305798	0.3058	200.923	357	91.2305	265.769	153.073	81.2641	1397	357	1040	599	318	0.5628
2022	08.22	AS	31	600	48480	337	1821	1484	370	398	528	914	1507	0.1851	0.815	4.2603	4.404	0.3888	0.7884	0.2116	0.1887	0.429	32.7075	36.0897	0.0545	1.354	0.2506	1.1034	0.6744	0.233	0.8149	0.6112	0.4981	0.3462	0.1724	0.211597	0.2116	248.892	337	62.3663	274.634	167.852	58.1098	1821	337	1484	907	314	0.7386
2022	08.22	AS	31	600	52810	383	2132	1749	423	458	618	1025	1813	0.1796	0.82	4.4118	4.567	0.3671	0.8176	0.1824	0.2001	0.4479	30.2337	36.8895	0.0504	1.4873	0.2672	1.2201	0.7723	0.223	0.8204	0.6329	0.5192	0.2882	0.1496	0.182402	0.1824	257.514	383	68.8035	314.197	198.865	57.3063	2132	383	1749	1107	319	0.6723
2022	08.22	AS	31	500	40193	393	1771	1378	423	448	570	882	1443	0.2219	0.778	3.4258	3.506	0.3549	0.762	0.238	0.1814	0.4282	29.207	35.2396	0.0584	1.5506	0.3441	1.2065	0.7784	0.287	0.7781	0.6451	0.502	0.369	0.1852	0.238042	0.238	253.45	393	87.2101	305.79	197.277	72.786	1771	393	1378	889	328	0.6449
2022	08.22	AS	31	700	51281	340	1735	1395	367	393	509	871	1407	0.196	0.804	4.2164	4.103	0.3806	0.7649	0.2351	0.1864	0.4038	36.8	39.0408	0.0526	1.3195	0.2586	1.0609	0.6571	0.249	0.804	0.6194	0.498	0.3796	0.189	0.235124	0.2351	257.673	340	66.6282	273.372	169.314	64.2767	1735	340	1395	864	328	0.7579
2022	08.22	AS	31	600	49865	362	1735	1373	389	414	531	893	1417	0.2086	0.791	3.7385	3.793	0.3867	0.7684	0.2316	0.1821	0.4103	36.3576	38.5714	0.0606	1.3406	0.2797	1.0609	0.6506	0.246	0.7914	0.6133	0.4853	0.3777	0.1833	0.231643	0.2316	270.028	362	75.5297	286.47	175.679	66.3493	1735	362	1373	842	318	0.7459
2022	08.22	AS	31	700	52551	363	1816	1453	395	423	556	913	1490	0.1999	0.8	3.7461	4.003	0.3785	0.7756	0.2244	0.1927	0.4428	36.2069	42.3511	0.0517	1.4619	0.2922	1.1697	0.7269	0.262	0.8001	0.6215	0.4972	0.361	0.1795	0.224362	0.2244	248.307	363	72.56	290.44	180.501	65.1641	1816	363	1453	903	326	0.684
2022	08.22	AS	31	600	52794	371	1987	1616	405	435	572	972	1640	0.1867	0.813	4.4722	4.356	0.3719	0.7853	0.2147	0.1856	0.4146	32.7087	36.4639	0.0545	1.3707	0.2559	1.1148	0.7002	0.239	0.8133	0.6281	0.5108	0.3419	0.1746	0.214747	0.2147	270.665	371	69.2708	301.729	189.514	64.7896	1987	371	1616	1015	347	0.7295
2022	08.22	AS	31	600	50405	376	1961	1585	412	443	601	999	1633	0.1917	0.808	3.6419	4.215	0.3931	0.7931	0.2069	0.1956	0.4732	31.8409	38.3317	0.0531	1.4894	0.2856	1.2039	0.7307	0.249	0.8083	0.6069	0.4906	0.341	0.1673	0.206953	0.2069	252.451	376	72.0938	303.906	184.453	62.8904	1961	376	1585	962	328	0.6714
2022	08.22	AS	31	400	42701	317	1904	1587	349	378	517	922	1602	0.1665	0.834	5.1221	5.006	0.3812	0.8097	0.1903	0.1827	0.4201	26.9459	29.6925	0.0674	1.322	0.2201	1.1019	0.6818	0.21	0.8335	0.6188	0.5158	0.3075	0.1586	0.190281	0.1903	239.788	317	52.7778	264.222	163.495	50.2805	1904	317	1587	982	302	0.7564
2022	08.22	AS	32	500	33502	308	1348	1040	344	378	536	843	1151	0.2285	0.772	1.4425	3.377	0.5144	0.8106	0.1894	0.3269	0.7308	32.2523	45.8163	0.0645	1.8413	0.4207	1.4206	0.6898	0.269	0.7715	0.4856	0.3746	0.3901	0.1461	0.189433	0.1894	167.273	308	70.3739	237.626	115.386	45.0119	1348	308	1040	505	197	0.5431
2022	08.22	AS	32	600	36727	368	1615	1247	411	450	624	970	1388	0.2279	0.772	1.6481	3.389	0.4828	0.818	0.182	0.3128	0.6843	29.491	41.8034	0.0492	1.8358	0.4183	1.4175	0.7332	0.258	0.7721	0.5172	0.3994	0.3519	0.1406	0.182003	0.182	200.458	368	83.8539	284.146	146.972	51.7251	1615	368	1247	645	227	0.5447
2022	08.22	AS	32	600	38471	333	1692	1359	370	403	553	923	1446	0.1968	0.803	2.8644	4.081	0.4341	0.819	0.181	0.2428	0.5396	28.3473	35.2339	0.0472	1.5475	0.3046	1.2429	0.7033	0.225	0.8032	0.5659	0.4545	0.3199	0.1454	0.181031	0.181	215.186	333	65.5372	267.463	151.346	48.4149	1692	333	1359	769	246	0.6462
2022	08.22	AS	32	600	38248	316	1682	1366	359	396	581	932	1442	0.1879	0.812	2.484	4.323	0.451	0.8243	0.1757	0.2709	0.6467	28.0392	40.2077	0.0467	1.7657	0.3317	1.434	0.7873	0.252	0.8121	0.549	0.4459	0.32	0.1427	0.17568	0.1757	178.966	316	59.3674	256.633	140.904	45.0892	1682	316	1366	750	240	0.5663
2022	08.22	AS	32	600	49887	328	1734	1406	361	388	521	895	1423	0.1892	0.811	3.7774	4.287	0.4033	0.7788	0.2212	0.192	0.4576	35.5212	40.3033	0.0592	1.3993	0.2647	1.1346	0.6771	0.251	0.8108	0.5967	0.4839	0.3707	0.1794	0.221197	0.2212	234.403	328	62.0438	265.956	158.704	58.8281	1734	328	1406	839	311	0.7146
2022	08.22	AS	32	600	49910	318	1596	1278	342	363	477	832	1305	0.1992	0.801	3.8658	4.019	0.4022	0.7723	0.2277	0.1643	0.4147	39.0928	40.3097	0.0652	1.2877	0.2566	1.0311	0.6164	0.235	0.8008	0.5978	0.4787	0.3809	0.1823	0.227702	0.2277	246.952	318	63.3609	254.639	152.226	57.9812	1596	318	1278	764	291	0.7766
2022	08.22	AS	32	600	53717	345	1781	1436	374	400	534	922	1458	0.1937	0.806	3.8133	4.162	0.4018	0.7751	0.2249	0.1811	0.4387	37.4465	40.8861	0.0624	1.3542	0.2623	1.0919	0.6531	0.246	0.8063	0.5982	0.4823	0.376	0.1814	0.224923	0.2249	254.763	345	66.8304	278.17	166.398	62.5688	1781	345	1436	859	323	0.7385
2022	08.22	AS	32	600	35443	340	1536	1196	368	393	507	861	1308	0.2214	0.779	2.7677	3.518	0.4356	0.8094	0.1906	0.209	0.4654	29.6743	31.7057	0.0495	1.3722	0.3037	1.0685	0.603	0.204	0.7786	0.5644	0.4395	0.3378	0.1484	0.190654	0.1906	247.777	340	75.2604	264.74	149.414	50.4688	1536	340	1196	675	228	0.7288
2022	08.22	AS	32	600	53686	404	1830	1426	431	457	576	923	1495	0.2208	0.779	3.626	3.53	0.364	0.7651	0.2349	0.1823	0.4021	37.6877	41.6332	0.0628	1.4177	0.313	1.1047	0.7026	0.26	0.7792	0.636	0.4956	0.3693	0.1831	0.234875	0.2349	284.969	404	89.1891	314.811	200.234	73.9563	1830	404	1426	907	335	0.7054
2022	09.22	SS	1	800	40503	329	2004	1675	395	451	747	1370	1671	0.1642	0.836	1.6136	5.091	0.6215	0.8012	0.1988	0.3343	0.8318	24.1809	32.3651	0.0302	1.6014	0.2629	1.3385	0.5066	0.266	0.8358	0.3785	0.3164	0.5252	0.1662	0.198788	0.1988	205.445	329	54.0125	274.988	104.085	54.6692	2004	329	1675	634	333	0.6245
2022	09.22	SS	1	900	61447	379	1927	1548	432	474	690	1259	1567	0.1967	0.803	1.7619	4.084	0.5685	0.7674	0.2326	0.2713	0.6697	39.6948	46.7616	0.0441	1.4664	0.2884	1.178	0.5083	0.274	0.8033	0.4315	0.3467	0.5389	0.1868	0.232535	0.2326	258.456	379	74.5413	304.459	131.381	70.8044	1927	379	1548	668	360	0.6819
2022	09.22	SS	1	900	49411	398	1586	1188	438	474	639	1071	1307	0.2509	0.749	1.1945	2.985	0.5665	0.7652	0.2348	0.303	0.6762	41.5921	49.6469	0.0462	1.5936	0.3999	1.1937	0.5175	0.28	0.7491	0.4335	0.3247	0.5417	0.1759	0.234827	0.2348	249.749	398	99.8764	298.124	129.237	70.0139	1586	398	1188	515	279	0.6275
2022	09.22	SS	1	900	53805	362	1732	1370	402	433	615	1158	1457	0.209	0.791	1.6979	3.785	0.581	0.7993	0.2007	0.2263	0.6156	39.2734	41.6088	0.0436	1.3394	0.2799	1.0595	0.4439	0.213	0.791	0.419	0.3314	0.4791	0.1588	0.200743	0.2007	270.27	362	75.6605	286.339	119.97	57.4769	1732	362	1370	574	275	0.7466
2022	09.22	SS	1	900	57334	378	1759	1381	424	458	662	1194	1473	0.2149	0.785	1.4266	3.653	0.5909	0.7929	0.2071	0.2462	0.6855	41.5163	48.1644	0.0461	1.4777	0.3175	1.1601	0.4746	0.24	0.7851	0.4091	0.3212	0.5062	0.1626	0.207086	0.2071	255.803	378	81.2302	296.77	121.416	61.4599	1759	378	1381	565	286	0.6767
2022	09.22	SS	1	900	49129	367	1643	1276	413	455	662	1173	1401	0.2234	0.777	1.0755	3.477	0.6317	0.8103	0.1897	0.3292	0.7706	38.502	46.973	0.0428	1.5709	0.3509	1.22	0.4494	0.231	0.7766	0.3683	0.2861	0.5149	0.1473	0.189638	0.1897	233.624	367	81.9775	285.022	104.985	54.056	1643	367	1276	470	242	0.6366
2022	09.22	SS	1	900	43214	372	1626	1254	419	459	660	1164	1401	0.2288	0.771	1.0426	3.371	0.6316	0.8206	0.1794	0.319	0.7656	34.4607	41.7706	0.0383	1.5717	0.3596	1.2121	0.4466	0.217	0.7712	0.3684	0.2841	0.487	0.1384	0.179411	0.1794	236.686	372	85.107	286.893	105.697	51.476	1626	372	1254	462	225	0.6363
2022	09.22	SS	1	800	40950	381	1558	1177	425	464	652	1125	1349	0.2445	0.755	0.9322	3.089	0.6321	0.8224	0.1776	0.3314	0.7675	34.7918	42.2427	0.0435	1.6072	0.393	1.2142	0.4467	0.216	0.7555	0.3679	0.2779	0.4827	0.1341	0.177585	0.1776	237.058	381	93.1714	287.829	105.888	51.1098	1558	381	1177	433	209	0.6222
2022	09.22	SS	1	800	36082	380	1461	1081	429	470	670	1091	1283	0.2601	0.74	0.6714	2.845	0.6577	0.8353	0.1647	0.3793	0.8942	33.3781	45.3805	0.0417	1.8375	0.4779	1.3596	0.4654	0.224	0.7399	0.3423	0.2533	0.4811	0.1218	0.164681	0.1647	206.803	380	98.8364	281.164	96.2355	46.2971	1461	380	1081	370	178	0.5442
2022	09.22	SS	2	900	28128	378	1406	1028	442	497	732	1090	1222	0.2688	0.731	0.4437	2.72	0.6926	0.821	0.179	0.535	1.1479	27.3623	45.3477	0.0304	2.2667	0.6094	1.6573	0.5094	0.297	0.7312	0.3074	0.2248	0.5823	0.1309	0.178999	0.179	166.762	378	101.624	276.375	84.9559	49.468	1406	378	1028	316	184	0.4412
2022	09.22	SS	2	700	41275	327	1710	1383	428	514	877	1280	1458	0.1912	0.809	0.6686	4.229	0.6891	0.8178	0.1822	0.6218	1.3256	29.8443	57.4129	0.0426	2.3786	0.4549	1.9237	0.5981	0.351	0.8088	0.3109	0.2515	0.586	0.1474	0.182187	0.1822	137.476	327	62.5316	264.468	82.2281	48.1895	1710	327	1383	430	252	0.4204
2022	09.22	SS	2	900	35015	386	1475	1089	448	502	689	907	1196	0.2617	0.738	0.9762	2.821	0.4784	0.7438	0.2562	0.4959	0.9275	32.1537	62.3325	0.0357	2.6257	0.6871	1.9386	1.0111	0.497	0.7383	0.5216	0.3851	0.4912	0.1892	0.25621	0.2562	147.008	386	101.014	284.986	148.643	73.0129	1475	386	1089	568	279	0.3808
2022	09.22	SS	2	700	35579	355	1529	1174	432	504	788	1171	1319	0.2322	0.768	0.5249	3.307	0.6951	0.8211	0.1789	0.6133	1.2294	30.3058	53.6046	0.0433	2.3036	0.5349	1.7688	0.5394	0.316	0.7678	0.3049	0.2341	0.5866	0.1373	0.178854	0.1789	154.107	355	82.4232	272.577	83.1197	48.7574	1529	355	1174	358	210	0.4341
2022	09.22	SS	2	900	29898	398	1300	902	476	558	779	963	1109	0.3062	0.694	0.3477	2.266	0.6264	0.7882	0.2118	0.9091	1.408	33.1467	74.5068	0.0368	3.2396	0.9918	2.2478	0.8398	0.476	0.6938	0.3736	0.2592	0.5668	0.1469	0.211756	0.2118	122.855	398	121.849	276.151	103.174	58.4754	1300	398	902	337	191	0.3087
2022	09.22	SS	2	700	21233	314	1195	881	399	490	761	974	1045	0.2628	0.737	0.2557	2.806	0.7491	0.8297	0.1703	1.0329	1.6913	24.1015	54.411	0.0344	3.0622	0.8046	2.2576	0.5663	0.384	0.7372	0.2509	0.1849	0.6787	0.1255	0.170286	0.1703	102.541	314	82.5071	231.493	58.0703	39.4142	1195	314	881	221	150	0.3266
2022	09.22	SS	2	800	29529	337	1262	925	439	545	822	1029	1084	0.267	0.733	0.2416	2.745	0.7481	0.8076	0.1924	1.1459	1.7477	31.9237	74.581	0.0399	3.1874	0.8511	2.3362	0.5885	0.45	0.733	0.2519	0.1846	0.7639	0.141	0.192426	0.1924	105.729	337	89.9913	247.009	62.2195	47.5325	1262	337	925	233	178	0.3137
2022	09.22	SS	2	700	43093	369	1662	1293	429	482	735	1211	1421	0.222	0.778	0.8398	3.504	0.6512	0.8136	0.1864	0.4099	0.9435	33.3279	48.2898	0.0476	1.8624	0.4135	1.4489	0.5054	0.27	0.778	0.3488	0.2714	0.5344	0.145	0.186399	0.1864	198.131	369	81.926	287.074	100.132	53.5072	1662	369	1293	451	241	0.5369
2022	09.22	SS	2	900	23452	350	1322	972	427	499	767	1058	1148	0.2648	0.735	0.3232	2.777	0.7284	0.821	0.179	0.7407	1.43	24.1275	47.369	0.0268	2.6702	0.7069	1.9633	0.5332	0.351	0.7352	0.2716	0.1997	0.6591	0.1316	0.179012	0.179	131.076	350	92.6626	257.337	69.8941	46.0666	1322	350	972	264	174	0.3745
2022	09.22	SS	3	900	46233	364	1874	1510	452	528	861	1352	1566	0.1942	0.806	0.8777	4.148	0.6543	0.796	0.204	0.5033	1.0971	30.618	51.3399	0.034	2.081	0.4042	1.6768	0.5797	0.342	0.8058	0.3457	0.2785	0.59	0.1644	0.203963	0.204	174.916	364	70.7022	293.298	101.392	59.825	1874	364	1510	522	308	0.4805
2022	09.22	SS	3	800	29453	342	1926	1584	440	521	894	1432	1673	0.1776	0.822	0.8522	4.632	0.6881	0.8403	0.1597	0.5114	1.1616	18.5939	31.3878	0.0232	2.0525	0.3645	1.6881	0.5265	0.27	0.8224	0.3119	0.2565	0.5121	0.1314	0.159724	0.1597	166.626	342	60.729	281.271	87.7196	44.9252	1926	342	1584	494	253	0.4872
2022	09.22	SS	3	900	52462	370	1883	1513	444	499	785	1315	1559	0.1965	0.804	1.1243	4.089	0.6246	0.7859	0.2141	0.3635	0.9143	34.6742	50.7576	0.0385	1.8218	0.358	1.4638	0.5495	0.313	0.8035	0.3754	0.3016	0.5704	0.1721	0.214128	0.2141	203.096	370	72.7031	297.297	111.609	63.6644	1883	370	1513	568	324	0.5489
2022	09.22	SS	3	800	46826	385	1824	1439	455	517	803	1317	1528	0.2111	0.789	0.8941	3.738	0.6477	0.7943	0.2057	0.4309	0.9683	32.5408	48.6482	0.0407	1.895	0.4	1.495	0.5267	0.308	0.7889	0.3523	0.278	0.5838	0.1623	0.205673	0.2057	203.166	385	81.2637	303.736	107.015	62.4781	1824	385	1439	507	296	0.5277
2022	09.22	SS	3	800	41861	386	1718	1332	459	514	816	1282	1460	0.2247	0.775	0.6782	3.451	0.6727	0.8063	0.1937	0.4129	1.0761	31.4269	50.2736	0.0393	2.0633	0.4636	1.5997	0.5236	0.31	0.7753	0.3273	0.2538	0.5917	0.1502	0.193663	0.1937	187.079	386	86.7264	299.274	97.9604	57.9674	1718	386	1332	436	258	0.4847
2022	09.22	SS	3	800	39299	318	1558	1240	387	444	710	1140	1328	0.2041	0.796	0.8273	3.899	0.6629	0.8145	0.1855	0.4597	1.0538	31.6924	50.3788	0.0396	1.9973	0.4077	1.5896	0.5359	0.295	0.7959	0.3371	0.2683	0.5502	0.1476	0.185472	0.1855	159.215	318	64.9063	253.094	85.3171	46.9448	1558	318	1240	418	230	0.5007
2022	09.22	SS	3	700	43169	381	1755	1374	451	510	786	1284	1490	0.2171	0.783	0.8209	3.606	0.6572	0.8071	0.1929	0.4294	0.9825	31.4185	46.9712	0.0449	1.9096	0.4146	1.495	0.5125	0.288	0.7829	0.3428	0.2684	0.5626	0.151	0.192859	0.1929	199.518	381	82.7128	298.287	102.251	57.5299	1755	381	1374	471	265	0.5237
2022	09.22	SS	3	800	49082	344	1780	1436	406	458	723	1245	1456	0.1933	0.807	1.1885	4.174	0.6274	0.7744	0.2256	0.3621	0.8798	34.1793	47.9244	0.0427	1.738	0.3359	1.4021	0.5224	0.316	0.8067	0.3726	0.3006	0.6056	0.182	0.225647	0.2256	197.929	344	66.4809	277.519	103.393	62.6157	1780	344	1436	535	324	0.5754
2022	09.22	SS	3	700	47914	367	1980	1613	453	535	896	1426	1682	0.1854	0.815	0.9374	4.395	0.6565	0.8153	0.1847	0.5084	1.0932	29.7048	49.4613	0.0424	2.0439	0.3789	1.6651	0.5719	0.308	0.8146	0.3435	0.2798	0.5379	0.1505	0.184769	0.1847	179.559	367	68.0247	298.975	102.686	55.2354	1980	367	1613	554	298	0.4892
2022	09.22	SS	4	900	44914	374	1954	1580	466	547	892	1391	1633	0.1914	0.809	0.9282	4.225	0.6437	0.7968	0.2032	0.5127	1.0928	28.4265	48.2626	0.0316	2.0997	0.4019	1.6978	0.605	0.345	0.8086	0.3563	0.2881	0.5702	0.1643	0.203162	0.2032	178.121	374	71.5844	302.416	107.76	61.4401	1954	374	1580	563	321	0.4763
2022	09.22	SS	4	700	25790	286	1695	1409	401	504	899	1304	1466	0.1687	0.831	0.653	4.927	0.7225	0.8375	0.1625	0.731	1.4502	18.3035	36.7389	0.0261	2.4146	0.4074	2.0072	0.557	0.326	0.8313	0.2775	0.2307	0.5857	0.1351	0.162532	0.1625	118.446	286	48.2572	237.743	65.974	38.6395	1695	286	1409	391	229	0.4141
2022	09.22	SS	4	800	33554	348	1820	1472	434	510	841	1349	1569	0.1912	0.809	0.8171	4.23	0.68	0.8295	0.1705	0.5163	1.1164	22.7949	37.4223	0.0285	2.0298	0.3881	1.6417	0.5253	0.28	0.8088	0.32	0.2588	0.5329	0.1379	0.170528	0.1705	171.445	348	66.5407	281.459	90.0593	47.9934	1820	348	1472	471	251	0.4927
2022	09.22	SS	4	800	47395	355	1772	1417	403	446	656	1204	1467	0.2003	0.8	1.5058	3.992	0.5992	0.7848	0.2152	0.3035	0.7081	33.4477	39.5279	0.0418	1.4779	0.2961	1.1818	0.4737	0.254	0.7997	0.4008	0.3205	0.537	0.1721	0.21523	0.2152	240.206	355	71.1202	283.88	113.792	61.1033	1772	355	1417	568	305	0.6767
2022	09.22	SS	4	800	49638	370	1892	1522	435	490	764	1328	1572	0.1956	0.804	1.1842	4.114	0.6294	0.7898	0.2102	0.3614	0.8629	32.6138	44.7107	0.0408	1.7042	0.3333	1.3709	0.508	0.288	0.8044	0.3706	0.2981	0.5674	0.1691	0.210278	0.2102	217.111	370	72.3573	297.643	110.296	62.5793	1892	370	1522	564	320	0.5868
2022	09.22	SS	4	800	48569	369	1904	1535	438	499	790	1350	1604	0.1938	0.806	1.1033	4.16	0.6391	0.8046	0.1954	0.3974	0.9142	31.6408	45.2625	0.0396	1.7744	0.3439	1.4305	0.5163	0.28	0.8062	0.3609	0.291	0.5415	0.1576	0.195427	0.1954	207.958	369	71.5131	297.487	107.367	58.1408	1904	369	1535	554	300	0.5636
2022	09.22	SS	4	800	56004	346	1917	1571	402	449	697	1288	1578	0.1805	0.82	1.667	4.54	0.5996	0.7842	0.2158	0.2992	0.7447	35.6489	44.2773	0.0446	1.5156	0.2735	1.242	0.4973	0.268	0.8195	0.4004	0.3281	0.539	0.1768	0.215816	0.2158	228.292	346	62.4497	283.55	113.528	61.1862	1917	346	1571	629	339	0.6598
2022	09.22	SS	4	800	51541	350	1959	1609	431	500	846	1403	1636	0.1787	0.821	1.0581	4.597	0.6544	0.7993	0.2007	0.4288	1.0276	32.0332	50.2959	0.04	1.9117	0.3415	1.5701	0.5426	0.315	0.8213	0.3456	0.2838	0.5809	0.1649	0.200759	0.2007	183.083	350	62.5319	287.468	99.3364	57.708	1959	350	1609	556	323	0.5231
2022	09.22	SS	4	800	49167	374	1879	1505	431	484	732	1221	1557	0.199	0.801	1.481	4.024	0.5628	0.786	0.214	0.3522	0.7929	32.6694	46.0277	0.0408	1.759	0.3501	1.4089	0.616	0.301	0.801	0.4372	0.3502	0.4894	0.1714	0.213966	0.214	212.621	374	74.4417	299.558	130.97	64.0915	1879	374	1505	658	322	0.5685
2022	09.22	SS	5	900	31251	345	1550	1205	463	580	927	1235	1351	0.2226	0.777	0.3674	3.493	0.7386	0.8349	0.1651	0.971	1.61	25.9343	56.531	0.0288	2.8039	0.6241	2.1798	0.5698	0.36	0.7774	0.2614	0.2032	0.6317	0.1284	0.165126	0.1651	123.043	345	76.7903	268.21	70.1129	44.2935	1550	345	1205	315	199	0.3567
2022	09.22	SS	5	900	45066	384	1680	1296	457	522	800	1243	1413	0.2286	0.771	0.6838	3.375	0.6628	0.794	0.206	0.5015	1.07	34.8111	56.1949	0.0387	2.0926	0.4783	1.6143	0.5443	0.333	0.7714	0.3372	0.2601	0.611	0.1589	0.206029	0.206	183.504	384	87.7714	296.229	99.8857	61.0286	1680	384	1296	437	267	0.4779
2022	09.22	SS	5	900	40059	340	1719	1379	432	512	853	1274	1453	0.1978	0.802	0.7056	4.056	0.6773	0.8071	0.1929	0.5801	1.24	29.0871	53.2538	0.0323	2.2822	0.4514	1.8308	0.5908	0.353	0.8022	0.3227	0.2589	0.5978	0.1547	0.19291	0.1929	148.979	340	67.2484	272.752	88.0163	52.612	1719	340	1379	445	266	0.4382
2022	09.22	SS	5	900	48279	345	1605	1260	396	443	670	1141	1347	0.215	0.785	1.0233	3.652	0.6317	0.7952	0.2048	0.373	0.8598	38.3551	52.2001	0.0426	1.7336	0.3726	1.361	0.5012	0.279	0.785	0.3683	0.2891	0.556	0.1607	0.204775	0.2048	199.008	345	74.1589	270.841	99.7383	55.4579	1605	345	1260	464	258	0.5768
2022	09.22	SS	5	900	42219	346	1588	1242	406	459	709	1162	1343	0.2179	0.782	0.8237	3.59	0.657	0.8027	0.1973	0.4267	0.9742	34.0314	50.4632	0.0378	1.8959	0.4131	1.4828	0.5086	0.293	0.7821	0.343	0.2683	0.5751	0.1543	0.197259	0.1973	182.499	346	75.3879	270.612	92.8186	53.3816	1588	346	1242	426	245	0.5274
2022	09.22	SS	5	900	27713	306	1359	1053	365	418	666	1044	1192	0.2252	0.775	0.5833	3.441	0.7009	0.8414	0.1586	0.5033	1.1396	26.3562	42.8556	0.0293	2.0985	0.4725	1.626	0.4864	0.258	0.7748	0.2991	0.2318	0.5302	0.1229	0.158583	0.1586	145.818	306	68.9007	237.099	70.9272	37.6026	1359	306	1053	315	167	0.4765
2022	09.22	SS	5	900	37721	373	1527	1154	441	503	766	1158	1303	0.2443	0.756	0.5488	3.094	0.6802	0.8059	0.1941	0.5373	1.1352	32.7255	54.612	0.0364	2.2082	0.5394	1.6688	0.5336	0.324	0.7557	0.3198	0.2417	0.607	0.1467	0.194119	0.1941	168.916	373	91.1126	281.887	90.1356	54.7164	1527	373	1154	369	224	0.4529
2022	09.22	SS	5	900	33654	359	1468	1109	419	472	709	1094	1253	0.2446	0.755	0.6234	3.089	0.6628	0.8061	0.1939	0.4779	1.052	30.385	48.2301	0.0338	2.1011	0.5138	1.5873	0.5353	0.308	0.7554	0.3372	0.2548	0.5749	0.1465	0.193856	0.1939	170.863	359	87.7936	271.206	91.4619	52.5783	1468	359	1109	374	215	0.4759
2022	09.22	SS	5	900	40442	371	1532	1161	423	470	687	1125	1294	0.2422	0.758	0.7636	3.129	0.6494	0.795	0.205	0.4048	0.9073	34.8728	48.7171	0.0387	1.8434	0.4464	1.397	0.4897	0.286	0.7578	0.3506	0.2657	0.5848	0.1554	0.205031	0.205	201.259	371	89.844	281.156	98.562	57.6358	1532	371	1161	407	238	0.5425
2022	09.22	SS	6	900	39344	318	1613	1295	408	487	809	1201	1368	0.1971	0.803	0.6859	4.072	0.6819	0.8108	0.1892	0.61	1.2638	30.4197	56.3838	0.0338	2.3087	0.4552	1.8535	0.5897	0.351	0.8029	0.3181	0.2554	0.5947	0.1519	0.189174	0.1892	137.74	318	62.6931	255.307	81.225	48.3013	1613	318	1295	412	245	0.4331
2022	09.22	SS	6	900	33929	313	1574	1261	441	563	935	1228	1353	0.1989	0.801	0.4489	4.029	0.7256	0.8247	0.1753	0.9675	1.6442	26.9434	61.052	0.0299	2.8284	0.5624	2.2659	0.6217	0.397	0.8011	0.2744	0.2198	0.6387	0.1404	0.175259	0.1753	110.663	313	62.2421	250.758	68.8043	43.9473	1574	313	1261	346	221	0.3536
2022	09.22	SS	6	900	47021	348	1590	1242	414	472	737	1169	1338	0.2189	0.781	0.7543	3.569	0.661	0.7971	0.2029	0.467	1.044	37.8979	59.8549	0.0421	2.0219	0.4425	1.5794	0.5354	0.32	0.7811	0.339	0.2648	0.5986	0.1585	0.202925	0.2029	172.115	348	76.166	271.834	92.1434	55.1547	1590	348	1242	421	252	0.4946
2022	09.22	SS	6	900	37323	362	1484	1122	439	510	793	1145	1285	0.2439	0.756	0.4608	3.099	0.6979	0.8226	0.1774	0.6328	1.2805	33.3024	61.104	0.037	2.4268	0.592	1.8348	0.5544	0.325	0.7561	0.3021	0.2284	0.587	0.1341	0.177333	0.1774	149.168	362	88.3046	273.695	82.6941	48.5431	1484	362	1122	339	199	0.4121
2022	09.22	SS	6	900	37580	368	1413	1045	439	504	769	1108	1232	0.2604	0.74	0.3993	2.84	0.7081	0.8268	0.1732	0.622	1.2791	36.0001	65.0273	0.04	2.4424	0.6361	1.8063	0.5272	0.313	0.7396	0.2919	0.2159	0.5934	0.1281	0.173213	0.1732	150.671	368	95.8415	272.159	79.4338	47.1394	1413	368	1045	305	181	0.4094
2022	09.22	SS	6	900	36682	363	1516	1153	444	518	810	1173	1310	0.2394	0.761	0.4634	3.176	0.7025	0.8213	0.1787	0.6418	1.2923	31.8522	58.5924	0.0354	2.4186	0.5791	1.8395	0.5472	0.329	0.7606	0.2975	0.2263	0.6006	0.1359	0.178678	0.1787	150.087	363	86.9189	276.081	82.1299	49.3259	1516	363	1153	343	206	0.4135
2022	09.22	SS	6	900	32740	357	1352	995	436	507	766	1078	1190	0.2641	0.736	0.3435	2.787	0.7246	0.8372	0.1628	0.7136	1.3702	32.9422	62.2901	0.0366	2.5693	0.6784	1.8909	0.5207	0.308	0.7359	0.2754	0.2027	0.5912	0.1198	0.162816	0.1628	138.948	357	94.267	262.733	72.3506	42.7766	1352	357	995	274	162	0.3892
2022	09.22	SS	6	900	33628	356	1267	911	416	470	689	992	1119	0.281	0.719	0.3799	2.559	0.6981	0.8375	0.1625	0.5928	1.2184	36.9519	64.4915	0.0411	2.4273	0.682	1.7453	0.5268	0.284	0.719	0.3019	0.217	0.5382	0.1168	0.162483	0.1625	146.665	356	100.028	255.972	77.2691	41.5848	1267	356	911	275	148	0.412
2022	09.22	SS	6	900	38794	351	1394	1043	417	472	714	1071	1208	0.2518	0.748	0.4946	2.972	0.6903	0.8217	0.1783	0.5273	1.1601	37.2328	62.5717	0.0414	2.2461	0.5656	1.6806	0.5204	0.3	0.7482	0.3097	0.2317	0.5759	0.1334	0.178356	0.1783	156.271	351	88.3795	262.62	81.3293	46.8336	1394	351	1043	323	186	0.4452
2022	09.22	SS	7	900	33071	424	1646	1222	540	663	1003	1315	1434	0.2576	0.742	0.3058	2.882	0.7291	0.8265	0.1735	1.0065	1.5794	27.0634	58.6221	0.0301	2.9177	0.7516	2.1661	0.5867	0.376	0.7424	0.2709	0.2011	0.6405	0.1288	0.173511	0.1735	145.32	424	109.22	314.78	85.2637	54.61	1646	424	1222	331	212	0.3427
2022	09.22	SS	7	900	22916	256	1019	763	350	458	673	822	869	0.2512	0.749	0.2636	2.98	0.7418	0.8034	0.1966	1.4155	1.8218	30.0338	73.7579	0.0334	3.2798	0.824	2.4558	0.6341	0.483	0.7488	0.2582	0.1933	0.7614	0.1472	0.196593	0.1966	78.0535	256	64.314	191.686	49.4917	37.684	1019	256	763	197	150	0.3049
2022	09.22	SS	7	800	38763	365	1684	1319	485	608	969	1310	1435	0.2167	0.783	0.4382	3.614	0.7165	0.8112	0.1888	0.9325	1.5264	29.388	62.6114	0.0367	2.7201	0.5896	2.1305	0.6041	0.402	0.7833	0.2835	0.2221	0.6658	0.1479	0.188754	0.1888	134.186	365	79.1122	285.888	81.0629	53.9697	1684	365	1319	374	249	0.3676
2022	09.22	SS	7	900	39706	371	1578	1207	455	532	834	1201	1337	0.2351	0.765	0.5066	3.253	0.6877	0.8003	0.1997	0.6379	1.2787	32.8966	61.1692	0.0366	2.431	0.5715	1.8594	0.5808	0.371	0.7649	0.3123	0.2389	0.6393	0.1527	0.199653	0.1997	152.612	371	87.225	283.775	88.6356	56.661	1578	371	1207	377	241	0.4114
2022	09.22	SS	7	900	30614	268	1148	880	312	352	531	833	949	0.2334	0.767	0.7537	3.284	0.642	0.7739	0.2261	0.4545	0.9962	34.7884	53.9784	0.0387	2.0242	0.4725	1.5516	0.5554	0.351	0.7666	0.358	0.2744	0.6317	0.1733	0.226149	0.2261	132.398	268	62.5645	205.435	73.5366	46.4564	1148	268	880	315	199	0.494
2022	09.22	SS	7	800	38873	351	1557	1206	437	518	820	1164	1314	0.2254	0.775	0.5575	3.436	0.6741	0.7985	0.2015	0.6716	1.2963	32.2331	61.9816	0.0403	2.4826	0.5597	1.9229	0.6266	0.387	0.7746	0.3259	0.2524	0.6183	0.1561	0.201504	0.2015	141.384	351	79.1272	271.873	88.5954	54.7803	1557	351	1206	393	243	0.4028
2022	09.22	SS	7	900	45083	349	1645	1296	407	456	700	1182	1379	0.2122	0.788	0.9648	3.713	0.6427	0.7948	0.2052	0.3781	0.9028	34.7867	48.86	0.0387	1.7828	0.3782	1.4046	0.5018	0.288	0.7878	0.3573	0.2815	0.5745	0.1617	0.205269	0.2052	195.759	349	74.0432	274.957	98.2292	56.434	1645	349	1296	463	266	0.5609
2022	09.22	SS	7	800	46091	347	1679	1332	419	482	774	1236	1422	0.2067	0.793	0.7898	3.839	0.6674	0.8071	0.1929	0.473	1.0686	34.6031	55.4014	0.0433	2.0181	0.4171	1.601	0.5325	0.309	0.7933	0.3326	0.2638	0.5801	0.1531	0.192941	0.1929	171.944	347	71.7147	275.285	91.5551	53.1144	1679	347	1332	443	257	0.4955
2022	09.22	SS	7	900	40989	373	1571	1198	435	493	715	1030	1281	0.2374	0.763	0.9686	3.212	0.5484	0.7579	0.2421	0.4841	0.9516	34.2142	59.3671	0.038	2.2754	0.5402	1.7352	0.7836	0.42	0.7626	0.4516	0.3444	0.536	0.1846	0.242058	0.2421	163.927	373	88.5608	284.439	128.449	68.8542	1571	373	1198	541	290	0.4395
2022	09.22	SS	8	800	26274	257	1407	1150	398	536	894	1135	1226	0.1827	0.817	0.3904	4.475	0.7635	0.8426	0.1574	1.2	1.8464	22.8832	55.3403	0.0286	2.9588	0.5405	2.4184	0.572	0.381	0.8173	0.2365	0.1933	0.6654	0.1286	0.157367	0.1574	86.8595	257	46.9431	210.057	49.683	33.0611	1407	257	1150	272	181	0.338
2022	09.22	SS	8	900	32747	355	1407	1052	441	519	795	1108	1227	0.2523	0.748	0.3764	2.963	0.7158	0.8289	0.1711	0.7414	1.3942	31.1655	60.7031	0.0346	2.605	0.6573	1.9478	0.5536	0.333	0.7477	0.2842	0.2125	0.602	0.1279	0.171088	0.1711	136.276	355	89.57	265.43	75.4407	45.4158	1407	355	1052	299	180	0.3839
2022	09.22	SS	8	900	33296	297	1436	1139	416	530	875	1137	1242	0.2068	0.793	0.3934	3.835	0.7375	0.8297	0.1703	1.0009	1.6915	29.2692	67.1334	0.0325	2.8917	0.5981	2.2937	0.6021	0.391	0.7932	0.2625	0.2082	0.6488	0.1351	0.17031	0.1703	102.708	297	61.4269	235.573	61.8405	40.124	1436	297	1139	299	194	0.3458
2022	09.22	SS	8	900	37697	331	1496	1165	405	468	752	1131	1285	0.2213	0.779	0.5941	3.52	0.6867	0.8189	0.1811	0.5408	1.2046	32.3962	56.8283	0.036	2.2526	0.4984	1.7542	0.5496	0.318	0.7787	0.3133	0.244	0.5781	0.141	0.181119	0.1811	146.941	331	73.236	257.764	80.7587	46.6852	1496	331	1165	365	211	0.4439
2022	09.22	SS	8	900	32887	353	1364	1011	417	472	714	1066	1182	0.2588	0.741	0.4381	2.864	0.7052	0.82	0.18	0.544	1.1902	32.5677	54.9647	0.0362	2.277	0.5893	1.6877	0.4975	0.304	0.7412	0.2948	0.2185	0.6107	0.1334	0.180034	0.18	155.029	353	91.3556	261.644	77.1217	47.1012	1364	353	1011	298	182	0.4392
2022	09.22	SS	8	900	35928	352	1442	1090	426	496	772	1115	1236	0.2441	0.756	0.4556	3.097	0.7	0.811	0.189	0.6422	1.2844	32.9999	60.5502	0.0367	2.4274	0.5925	1.8349	0.5505	0.347	0.7559	0.3	0.2268	0.63	0.1429	0.189	0.189	145.011	352	85.9251	266.075	79.8225	50.2857	1442	352	1090	327	206	0.412
2022	09.22	SS	8	900	23809	340	1240	900	426	506	780	1030	1111	0.2742	0.726	0.2292	2.647	0.7667	0.8567	0.1433	0.8889	1.6296	26.4918	56.3111	0.0294	2.9286	0.803	2.1256	0.496	0.305	0.7258	0.2333	0.1694	0.6143	0.104	0.143316	0.1433	116.096	340	93.2258	246.774	57.5806	35.371	1240	340	900	210	129	0.3415
2022	09.22	SS	8	900	14536	295	1013	718	354	409	606	833	907	0.2912	0.709	0.2496	2.434	0.7493	0.8524	0.1476	0.766	1.4438	20.2835	39.084	0.0225	2.7186	0.7917	1.9269	0.4831	0.284	0.7088	0.2507	0.1777	0.5889	0.1046	0.147637	0.1476	108.512	295	85.9082	209.092	52.4186	30.8687	1013	295	718	180	106	0.3678
2022	09.22	SS	8	900	20977	371	1125	754	448	526	743	943	1004	0.3298	0.67	0.1666	2.032	0.7586	0.8395	0.1605	1.0345	1.6446	27.859	60.3936	0.031	3.2345	1.0667	2.1678	0.5233	0.348	0.6702	0.2414	0.1618	0.6648	0.1076	0.160483	0.1605	114.701	371	122.348	248.652	60.0196	39.9031	1125	371	754	182	121	0.3092
2022	09.22	C	9	900	50884	408	1962	1554	454	496	659	973	1559	0.208	0.792	2.9717	3.809	0.3636	0.7407	0.2593	0.2703	0.5384	32.783	48.5459	0.0364	1.8696	0.3888	1.4808	0.9424	0.384	0.792	0.6364	0.5041	0.4075	0.2054	0.259333	0.2593	218.228	408	84.844	323.156	205.664	83.8043	1962	408	1554	989	403	0.5349
2022	09.22	C	9	900	59032	356	1640	1284	391	419	557	1013	1329	0.2171	0.783	2.2022	3.607	0.5117	0.7578	0.2422	0.2181	0.5218	46.0141	46.9246	0.0511	1.3025	0.2827	1.0198	0.498	0.247	0.7829	0.4883	0.3823	0.496	0.1896	0.242197	0.2422	273.321	356	77.278	278.722	136.105	67.5098	1640	356	1284	627	311	0.7677
2022	09.22	C	9	900	61271	352	1788	1436	404	448	664	1176	1472	0.1969	0.803	1.6067	4.08	0.5738	0.7799	0.2201	0.3064	0.7242	42.7068	53.9017	0.0475	1.5715	0.3094	1.2621	0.5379	0.278	0.8031	0.4262	0.3423	0.5163	0.1767	0.220047	0.2201	223.99	352	69.2975	282.702	120.483	62.2103	1788	352	1436	612	316	0.6363
2022	09.22	C	9	800	36053	346	1398	1052	377	404	552	954	1189	0.2475	0.753	1.2328	3.04	0.5779	0.8013	0.1987	0.2567	0.6527	34.3103	38.7496	0.0429	1.5008	0.3715	1.1294	0.4767	0.224	0.7525	0.4221	0.3176	0.4707	0.1495	0.198682	0.1987	230.544	346	85.6338	260.366	109.888	51.7268	1398	346	1052	444	209	0.6663
2022	09.22	C	9	900	43381	345	1463	1118	372	395	520	960	1229	0.2358	0.764	1.7795	3.241	0.5501	0.7907	0.2093	0.2057	0.5218	38.8413	36.8413	0.0432	1.2412	0.2927	0.9485	0.4267	0.199	0.7642	0.4499	0.3438	0.4652	0.1599	0.209293	0.2093	277.957	345	81.3568	263.643	118.616	55.1811	1463	345	1118	503	234	0.8057
2022	09.22	C	9	700	33851	393	1444	1051	432	469	629	1036	1256	0.2722	0.728	0.8413	2.674	0.6118	0.8211	0.1789	0.352	0.7485	32.2474	39.4525	0.0461	1.6809	0.4575	1.2234	0.4749	0.219	0.7278	0.3882	0.2825	0.4608	0.1302	0.178883	0.1789	233.803	393	106.959	286.041	111.042	51.1662	1444	393	1051	408	188	0.5949
2022	09.22	C	9	800	36955	383	1463	1080	423	459	629	1057	1273	0.2618	0.738	0.8589	2.82	0.6241	0.8241	0.1759	0.3333	0.7593	34.2569	41.6776	0.0428	1.6481	0.4314	1.2166	0.4574	0.214	0.7382	0.3759	0.2775	0.468	0.1299	0.175921	0.1759	232.389	383	100.266	282.734	106.287	49.7403	1463	383	1080	406	190	0.6068
2022	09.22	C	9	800	34342	366	1289	923	399	427	564	925	1116	0.2839	0.716	0.8299	2.522	0.6056	0.8126	0.1874	0.3034	0.7151	37.246	43.9756	0.0466	1.6489	0.4682	1.1807	0.4656	0.221	0.7161	0.3944	0.2824	0.4753	0.1342	0.187458	0.1874	221.966	366	103.922	262.078	103.355	49.1218	1289	366	923	364	173	0.6065
2022	09.22	C	9	900	36809	382	1546	1164	415	447	594	1048	1320	0.2471	0.753	1.3473	3.047	0.5722	0.8058	0.1942	0.2749	0.6071	31.662	33.5953	0.0352	1.4093	0.3482	1.0611	0.454	0.206	0.7529	0.4278	0.3221	0.4538	0.1462	0.194136	0.1942	271.057	382	94.3881	287.612	123.05	55.8422	1546	382	1164	498	226	0.7096
2022	09.22	C	10	900	59370	367	2316	1949	447	515	865	1560	1928	0.1585	0.842	1.6961	5.311	0.6121	0.8009	0.1991	0.3489	0.8517	30.5005	42.4399	0.0339	1.6535	0.262	1.3915	0.5397	0.277	0.8415	0.3879	0.3264	0.5132	0.1675	0.19907	0.1991	221.953	367	58.1559	308.844	119.798	61.4836	2316	367	1949	756	388	0.6048
2022	09.22	C	10	900	49453	345	2045	1700	445	531	909	1428	1723	0.1687	0.831	1.1203	4.928	0.6371	0.8106	0.1894	0.5059	1.1059	29.1282	50.5641	0.0324	2.0882	0.3523	1.7359	0.63	0.329	0.8313	0.3629	0.3017	0.5219	0.1575	0.189398	0.1894	165.214	345	58.2029	286.797	104.091	54.3227	2045	345	1700	617	322	0.4789
2022	09.22	C	10	900	49133	350	1960	1610	454	548	918	1388	1655	0.1786	0.821	0.9513	4.6	0.6447	0.8106	0.1894	0.5839	1.176	30.5552	55.7333	0.034	2.2205	0.3965	1.824	0.648	0.346	0.8214	0.3553	0.2918	0.5332	0.1556	0.189446	0.1894	157.622	350	62.5	287.5	102.143	54.4643	1960	350	1610	572	305	0.4503
2022	09.22	C	10	900	58161	346	1848	1502	393	434	653	1225	1520	0.1872	0.813	1.79	4.341	0.5852	0.7816	0.2184	0.273	0.6813	38.7613	45.126	0.0431	1.4324	0.2682	1.1642	0.4829	0.254	0.8128	0.4148	0.3371	0.5265	0.1775	0.218392	0.2184	241.553	346	64.7814	281.219	116.644	61.4113	1848	346	1502	623	328	0.6981
2022	09.22	C	10	800	44799	371	1778	1407	433	486	747	1269	1513	0.2087	0.791	1.0157	3.792	0.6382	0.8117	0.1883	0.3767	0.8908	31.8786	44.4928	0.0398	1.7637	0.368	1.3957	0.5049	0.263	0.7913	0.3618	0.2863	0.5206	0.149	0.188353	0.1883	210.353	371	77.4134	293.587	106.209	55.2953	1778	371	1407	509	265	0.567
2022	09.22	C	10	900	46627	377	1607	1230	425	464	663	1134	1365	0.2346	0.765	1.0325	3.263	0.6154	0.8033	0.1967	0.3171	0.7751	37.9471	47.789	0.0422	1.6454	0.386	1.2594	0.4843	0.248	0.7654	0.3846	0.2943	0.5116	0.1506	0.196761	0.1967	229.124	377	88.4437	288.556	110.965	56.7729	1607	377	1230	473	242	0.6078
2022	09.22	C	10	800	44753	367	1719	1352	414	455	664	1176	1454	0.2135	0.787	1.3243	3.684	0.5984	0.804	0.196	0.3033	0.7322	33.14	40.5545	0.0414	1.5559	0.3322	1.2237	0.4915	0.24	0.7865	0.4016	0.3159	0.488	0.1542	0.195981	0.196	235.876	367	78.3531	288.647	115.928	56.5765	1719	367	1352	543	265	0.6427
2022	09.22	C	10	900	48050	374	1584	1210	419	457	646	1116	1339	0.2361	0.764	1.0631	3.235	0.6132	0.7975	0.2025	0.314	0.7493	39.7494	48.5707	0.0442	1.5996	0.3777	1.2219	0.4726	0.247	0.7639	0.3868	0.2955	0.5235	0.1547	0.20249	0.2025	233.808	374	88.3056	285.694	110.5	57.8472	1584	374	1210	468	245	0.6252
2022	09.22	C	10	800	60886	360	1908	1548	402	439	634	1228	1564	0.1887	0.811	2.1645	4.3	0.5607	0.7778	0.2222	0.239	0.59	39.3711	41.4274	0.0492	1.2969	0.2447	1.0522	0.4622	0.234	0.8113	0.4393	0.3564	0.5059	0.1803	0.222242	0.2222	277.585	360	67.9245	292.075	128.302	64.9057	1908	360	1548	680	344	0.7711
2022	09.22	C	11	900	54932	331	1765	1434	376	411	595	1125	1455	0.1875	0.812	2.1332	4.332	0.5537	0.7838	0.2162	0.2441	0.6137	38.3458	42.4991	0.0426	1.3641	0.2558	1.1083	0.4946	0.24	0.8125	0.4463	0.3626	0.4844	0.1756	0.216188	0.2162	242.651	331	62.0742	268.926	120.023	58.136	1765	331	1434	640	310	0.7331
2022	09.22	C	11	900	77072	356	2194	1838	397	447	663	1304	1738	0.1623	0.838	3.1347	5.163	0.5158	0.7519	0.2481	0.272	0.5568	41.9718	45.3071	0.0466	1.2885	0.2091	1.0795	0.5227	0.268	0.8377	0.4842	0.4057	0.5124	0.2078	0.248104	0.2481	276.29	356	57.7648	298.235	144.412	73.9909	2194	356	1838	890	456	0.7761
2022	09.22	C	11	900	60579	366	1847	1481	409	442	620	1147	1483	0.1982	0.802	2.2355	4.046	0.5273	0.7542	0.2458	0.2228	0.5717	40.943	44.3855	0.0455	1.352	0.2679	1.0841	0.5124	0.266	0.8018	0.4727	0.379	0.52	0.1971	0.245804	0.2458	270.71	366	72.5263	293.474	138.711	72.1299	1847	366	1481	700	364	0.7397
2022	09.22	C	11	700	39746	347	1645	1298	392	429	626	1137	1394	0.2109	0.789	1.3435	3.741	0.6086	0.8066	0.1934	0.2851	0.7165	30.6601	36.0936	0.0438	1.4919	0.3147	1.1772	0.4607	0.228	0.7891	0.3914	0.3088	0.4941	0.1526	0.193391	0.1934	232.589	347	73.197	273.803	107.159	52.9465	1645	347	1298	508	251	0.6703
2022	09.22	C	11	900	56085	363	1832	1469	401	436	621	1183	1525	0.1981	0.802	2.0407	4.047	0.5582	0.791	0.209	0.2383	0.5854	38.2184	40.0828	0.0425	1.3079	0.2592	1.0488	0.4633	0.219	0.8019	0.4418	0.3543	0.473	0.1676	0.208971	0.209	277.544	363	71.9263	291.074	128.595	60.8302	1832	363	1469	649	307	0.7646
2022	09.22	C	11	900	34616	364	1329	965	400	427	564	944	1127	0.2739	0.726	0.9264	2.651	0.601	0.7907	0.2093	0.2798	0.6908	35.9104	41.2764	0.0399	1.583	0.4336	1.1494	0.4586	0.241	0.7261	0.399	0.2897	0.5247	0.152	0.209355	0.2093	229.943	364	99.696	264.304	105.448	55.3258	1329	364	965	385	202	0.6317
2022	09.22	C	11	900	38250	370	1622	1252	411	447	621	1107	1377	0.2281	0.772	1.3398	3.384	0.5887	0.8043	0.1957	0.2875	0.6683	30.5902	34.727	0.034	1.4707	0.3355	1.1352	0.467	0.222	0.7719	0.4113	0.3175	0.4757	0.151	0.195655	0.1957	251.581	370	84.402	285.598	117.478	55.8878	1622	370	1252	515	245	0.6799
2022	09.22	C	11	800	41096	371	1513	1142	408	440	593	1030	1265	0.2452	0.755	1.2637	3.078	0.5771	0.7828	0.2172	0.2802	0.648	36.0253	40.4533	0.045	1.4877	0.3648	1.1229	0.4749	0.244	0.7548	0.4229	0.3192	0.5135	0.1639	0.217159	0.2172	249.378	371	90.9722	280.028	118.436	60.8116	1513	371	1142	483	248	0.6722
2022	09.22	C	11	900	47427	402	1657	1255	433	459	572	849	1286	0.2426	0.757	2.8096	3.122	0.3562	0.7044	0.2956	0.2072	0.4515	37.8295	47.9568	0.042	1.6738	0.4061	1.2677	0.8162	0.375	0.7574	0.6438	0.4876	0.4592	0.2239	0.295633	0.2956	240.172	402	97.5281	304.472	196.027	90.0072	1657	402	1255	808	371	0.5974
2022	09.22	C	12	900	55703	353	2093	1740	420	478	771	1397	1725	0.1687	0.831	1.7058	4.929	0.6	0.7885	0.2115	0.3333	0.8008	32.0521	42.7771	0.0356	1.6054	0.2708	1.3346	0.5338	0.282	0.8313	0.4	0.3325	0.5287	0.1758	0.21148	0.2115	219.883	353	59.5361	293.464	117.386	62.0659	2093	353	1740	696	368	0.6229
2022	09.22	C	12	900	47654	349	2171	1822	429	493	830	1457	1792	0.1608	0.839	1.6259	5.221	0.6081	0.792	0.208	0.3513	0.88	26.1934	37.9033	0.0291	1.7242	0.2772	1.4471	0.5671	0.301	0.8392	0.3919	0.3289	0.5308	0.1746	0.208021	0.208	202.413	349	56.1036	292.896	114.779	60.9263	2171	349	1822	714	379	0.58
2022	09.22	C	12	700	40571	313	1788	1475	370	420	680	1238	1519	0.1751	0.825	1.4565	4.712	0.6271	0.8176	0.1824	0.339	0.8294	27.5446	36.4283	0.0393	1.6032	0.2806	1.3225	0.4931	0.241	0.8249	0.3729	0.3076	0.4891	0.1504	0.182385	0.1824	195.235	313	54.7925	258.207	96.2808	47.09	1788	313	1475	550	269	0.6238
2022	09.22	C	12	800	47767	360	1856	1496	416	469	712	1276	1546	0.194	0.806	1.3798	4.156	0.6123	0.7928	0.2072	0.3543	0.7843	31.9685	40.9494	0.04	1.5892	0.3082	1.2809	0.4966	0.265	0.806	0.3877	0.3125	0.5345	0.167	0.207226	0.2072	226.529	360	69.8276	290.172	112.5	60.1293	1856	360	1496	580	310	0.6293
2022	09.22	C	12	800	48896	371	1824	1453	433	489	754	1287	1533	0.2034	0.797	1.0936	3.916	0.6304	0.7997	0.2003	0.3854	0.8786	33.6908	46.9563	0.0421	1.7496	0.3559	1.3937	0.5151	0.279	0.7966	0.3696	0.2944	0.5419	0.1595	0.200286	0.2003	212.048	371	75.4611	295.539	109.225	59.1891	1824	371	1453	537	291	0.5716
2022	09.22	C	12	700	42774	356	1625	1269	409	457	687	1155	1369	0.2191	0.781	0.9882	3.565	0.6296	0.7983	0.2017	0.3783	0.8695	33.7453	46.5986	0.0482	1.7683	0.3874	1.3809	0.5114	0.279	0.7809	0.3704	0.2892	0.5447	0.1575	0.201757	0.2017	201.323	356	77.9914	278.009	102.966	56.0837	1625	356	1269	470	256	0.5655
2022	09.22	C	12	800	45839	377	1500	1123	427	485	696	1088	1247	0.2513	0.749	0.7201	2.979	0.6331	0.7747	0.2253	0.5165	0.9469	40.8567	61.1031	0.0511	1.9976	0.5021	1.4955	0.5487	0.337	0.7487	0.3669	0.2747	0.6141	0.1687	0.225313	0.2253	188.726	377	94.7527	282.247	103.549	63.5873	1500	377	1123	412	253	0.5006
2022	09.22	C	12	800	43504	377	1621	1244	427	474	692	1157	1354	0.2326	0.767	0.9325	3.3	0.627	0.7854	0.2146	0.3778	0.8441	35.0096	47.1283	0.0438	1.7541	0.408	1.3462	0.5021	0.289	0.7674	0.373	0.2862	0.5754	0.1647	0.214624	0.2146	214.925	377	87.6798	289.32	107.914	62.0969	1621	377	1244	464	267	0.5701
2022	09.22	C	12	700	46834	370	1613	1243	429	478	720	1164	1348	0.2294	0.771	0.8303	3.359	0.6388	0.7868	0.2132	0.3942	0.9386	37.7166	55.419	0.0539	1.9067	0.4374	1.4694	0.5308	0.313	0.7706	0.3612	0.2784	0.5902	0.1643	0.21318	0.2132	194.053	370	84.8729	285.127	102.994	60.7874	1613	370	1243	449	265	0.5245
2022	09.22	C	13	800	33855	361	1662	1301	410	452	661	1165	1433	0.2172	0.783	1.1684	3.604	0.618	0.824	0.176	0.3228	0.7686	26.0609	32.414	0.0326	1.5889	0.3451	1.2438	0.4751	0.219	0.7828	0.382	0.299	0.4608	0.1378	0.176026	0.176	227.201	361	78.4122	282.588	107.953	49.7407	1662	361	1301	497	229	0.6294
2022	09.22	C	13	800	45658	333	1978	1645	392	444	718	1330	1662	0.1684	0.832	1.7287	4.94	0.6061	0.8079	0.1921	0.3161	0.7801	27.7943	35.7767	0.0347	1.5478	0.2606	1.2872	0.5071	0.247	0.8316	0.3939	0.3276	0.4877	0.1598	0.192105	0.1921	215.144	333	56.0612	276.939	109.092	53.1992	1978	333	1645	648	316	0.6461
2022	09.22	C	13	900	51375	351	1583	1232	376	413	553	1021	1323	0.2217	0.778	1.9	3.51	0.5438	0.789	0.211	0.3003	0.5465	41.7401	41.9477	0.0464	1.2913	0.2863	1.005	0.4584	0.212	0.7783	0.4562	0.355	0.4626	0.1642	0.211038	0.211	271.819	351	77.8275	273.173	124.613	57.65	1583	351	1232	562	260	0.7744
2022	09.22	C	13	700	29686	327	1368	1041	357	385	509	903	1151	0.239	0.761	1.5474	3.183	0.5533	0.7915	0.2085	0.269	0.5828	28.5561	30.0764	0.0408	1.3841	0.3308	1.0532	0.4705	0.22	0.761	0.4467	0.3399	0.4667	0.1586	0.208475	0.2085	236.255	327	78.1645	248.835	111.151	51.8706	1368	327	1041	465	217	0.7225
2022	09.22	C	13	700	29172	351	1200	849	382	409	539	881	1035	0.2925	0.708	0.7259	2.419	0.6243	0.8057	0.1943	0.318	0.7381	34.3994	40.6735	0.0491	1.6712	0.4888	1.1824	0.4443	0.23	0.7075	0.3757	0.2658	0.5172	0.1375	0.194312	0.1943	210.029	351	102.668	248.333	93.3075	48.2625	1200	351	849	319	165	0.5984
2022	09.22	C	13	700	27256	349	1153	804	373	402	516	834	988	0.3027	0.697	0.7671	2.304	0.6032	0.7948	0.2052	0.3607	0.6924	33.9395	38.9547	0.0485	1.646	0.4982	1.1478	0.4554	0.236	0.6973	0.3968	0.2767	0.5172	0.1431	0.205225	0.2052	212.029	349	105.638	243.362	96.5577	49.9436	1153	349	804	319	165	0.6075
2022	09.22	C	13	900	43438	418	1540	1122	462	500	679	1094	1305	0.2714	0.729	0.8355	2.684	0.6025	0.7906	0.2094	0.3387	0.7754	38.7537	49.8754	0.0431	1.7664	0.4795	1.287	0.5116	0.27	0.7286	0.3975	0.2896	0.5269	0.1526	0.209443	0.2094	236.639	418	113.457	304.543	121.057	63.7857	1540	418	1122	446	235	0.5661
2022	09.22	C	13	700	41006	390	1549	1159	423	457	608	1048	1314	0.2518	0.748	1.2775	2.972	0.5677	0.7972	0.2028	0.2934	0.627	35.42	39.1163	0.0506	1.476	0.3716	1.1044	0.4774	0.224	0.7482	0.4323	0.3234	0.4691	0.1517	0.202792	0.2028	264.228	390	98.1924	291.808	126.139	59.1672	1549	390	1159	501	235	0.6775
2022	09.22	C	13	800	26885	350	1131	781	384	415	554	847	980	0.3095	0.691	0.5363	2.231	0.6364	0.8067	0.1933	0.3969	0.8707	34.4626	47.152	0.0431	1.9814	0.6132	1.3682	0.4975	0.265	0.6905	0.3636	0.2511	0.5317	0.1335	0.193326	0.1933	176.643	350	108.311	241.689	87.8868	46.7286	1131	350	781	284	151	0.5047
2022	09.22	C	14	800	43826	342	1949	1607	416	481	791	1356	1664	0.1755	0.825	1.2792	4.699	0.631	0.8227	0.1773	0.4045	0.9313	27.3105	40.3103	0.0341	1.7901	0.3141	1.476	0.5447	0.262	0.8245	0.369	0.3043	0.4806	0.1462	0.177341	0.1773	191.051	342	60.0123	281.988	104.056	50.0103	1949	342	1607	593	285	0.5586
2022	09.22	C	14	900	40087	359	1876	1517	422	478	746	1289	1589	0.1914	0.809	1.2957	4.226	0.6131	0.8108	0.1892	0.3691	0.8504	26.4638	36.7078	0.0294	1.7154	0.3283	1.3871	0.5367	0.262	0.8086	0.3869	0.3129	0.4889	0.153	0.189155	0.1892	209.281	359	68.6999	290.3	112.331	54.9216	1876	359	1517	587	287	0.583
2022	09.22	C	14	900	46908	370	2055	1685	443	503	810	1403	1729	0.18	0.82	1.3833	4.554	0.6131	0.8065	0.1935	0.3561	0.8704	27.877	39.5802	0.031	1.7316	0.3118	1.4198	0.5494	0.275	0.82	0.3869	0.3173	0.5	0.1586	0.19345	0.1935	213.675	370	66.618	303.382	117.392	58.6959	2055	370	1685	652	326	0.5775
2022	09.22	C	14	800	53489	372	1738	1366	406	436	596	1114	1449	0.214	0.786	2.01	3.672	0.5432	0.7884	0.2116	0.2196	0.5466	39.1964	39.4429	0.049	1.2803	0.274	1.0063	0.4597	0.213	0.786	0.4568	0.359	0.4631	0.1663	0.211544	0.2116	290.557	372	79.6226	292.377	133.56	61.8573	1738	372	1366	624	289	0.781
2022	09.22	C	14	700	49699	382	1771	1389	429	472	684	1215	1499	0.2157	0.784	1.3126	3.636	0.5997	0.8042	0.1958	0.3096	0.7247	35.8196	43.2874	0.0512	1.5408	0.3324	1.2085	0.4837	0.237	0.7843	0.4003	0.3139	0.4892	0.1536	0.195827	0.1958	247.923	382	82.3964	299.604	119.928	58.6697	1771	382	1389	556	272	0.649
2022	09.22	C	14	800	46503	359	1645	1286	402	436	613	1112	1394	0.2182	0.782	1.4691	3.582	0.5855	0.8048	0.1952	0.2644	0.6584	36.1998	40.7027	0.0452	1.4383	0.3139	1.1244	0.466	0.219	0.7818	0.4145	0.324	0.4709	0.1526	0.195188	0.1952	249.6	359	78.3471	280.653	116.32	54.7775	1645	359	1286	533	251	0.6953
2022	09.22	C	14	800	29226	364	1529	1165	392	421	540	858	1274	0.2381	0.762	2.3243	3.201	0.424	0.7811	0.2189	0.2489	0.5036	25.1258	29.839	0.0314	1.5586	0.3711	1.1876	0.684	0.26	0.7619	0.576	0.4388	0.38	0.1668	0.21888	0.2189	233.543	364	86.6553	277.345	159.741	60.7063	1529	364	1165	671	255	0.6416
2022	09.22	C	14	800	43660	349	1533	1184	384	415	565	1016	1305	0.2277	0.772	1.5679	3.393	0.5633	0.8074	0.1926	0.2618	0.6081	36.9138	39.847	0.0461	1.3976	0.3182	1.0795	0.4714	0.208	0.7723	0.4367	0.3372	0.441	0.1487	0.192585	0.1926	249.714	349	79.4527	269.547	117.699	51.9061	1533	349	1184	517	228	0.7155
2022	09.22	C	14	800	42014	399	1530	1131	444	474	656	1082	1316	0.2608	0.739	0.9132	2.835	0.6039	0.8108	0.1892	0.2653	0.7574	37.1867	46.6421	0.0465	1.6968	0.4425	1.2543	0.4968	0.237	0.7392	0.3961	0.2928	0.4777	0.1399	0.189217	0.1892	235.149	399	104.053	294.947	116.831	55.8078	1530	399	1131	448	214	0.5894
2022	09.22	C	15	900	61545	354	1848	1494	398	432	611	1136	1497	0.1916	0.808	2.3631	4.22	0.5234	0.7651	0.2349	0.2276	0.5734	41.234	45.1711	0.0458	1.3551	0.2596	1.0955	0.5221	0.257	0.8084	0.4766	0.3853	0.493	0.1899	0.234964	0.2349	261.235	354	67.8117	286.188	136.39	67.237	1848	354	1494	712	351	0.738
2022	09.22	C	15	900	55422	351	1776	1425	393	428	613	1125	1462	0.1976	0.802	2.0235	4.06	0.5432	0.7796	0.2204	0.2456	0.6129	38.9316	43.928	0.0433	1.4063	0.2779	1.1283	0.5155	0.249	0.8024	0.4568	0.3666	0.4823	0.1768	0.220315	0.2204	249.591	351	69.3699	281.63	128.661	62.0574	1776	351	1425	651	314	0.7111
2022	09.22	C	15	900	55344	402	1661	1259	438	472	629	1065	1385	0.242	0.758	1.5582	3.132	0.5266	0.7808	0.2192	0.2701	0.601	43.9978	50.2136	0.0489	1.5057	0.3644	1.1413	0.5403	0.25	0.758	0.4734	0.3588	0.4631	0.1662	0.219232	0.2192	266.985	402	97.2932	304.707	144.246	66.7983	1661	402	1259	596	276	0.6641
2022	09.22	C	15	900	29176	363	1428	1065	391	416	539	942	1214	0.2542	0.746	1.5105	2.934	0.5437	0.7991	0.2009	0.2347	0.5509	27.4348	27.798	0.0305	1.3586	0.3454	1.0132	0.4624	0.204	0.7458	0.4563	0.3403	0.4403	0.1499	0.200909	0.2009	267.187	363	92.2752	270.725	123.542	54.3992	1428	363	1065	486	214	0.7361
2022	09.22	C	15	800	29263	360	1451	1091	387	415	545	969	1246	0.2481	0.752	1.4842	3.031	0.5582	0.8121	0.1879	0.2566	0.5652	26.8615	27.1996	0.0336	1.3467	0.3341	1.0126	0.4474	0.19	0.7519	0.4418	0.3322	0.4253	0.1413	0.187898	0.1879	267.32	360	89.3177	270.682	119.587	50.8615	1451	360	1091	482	205	0.7425
2022	09.22	C	15	800	33864	321	1530	1209	353	382	530	985	1281	0.2098	0.79	1.9402	3.766	0.5492	0.794	0.206	0.2399	0.5762	28.0494	29.4293	0.0351	1.3278	0.2786	1.0492	0.473	0.216	0.7902	0.4508	0.3562	0.4569	0.1627	0.205971	0.206	241.753	321	67.3471	253.653	114.343	52.2412	1530	321	1209	545	249	0.7531
2022	09.22	C	15	900	37100	389	1363	974	418	446	564	917	1129	0.2854	0.715	1.14	2.504	0.5421	0.7598	0.2402	0.2875	0.5989	38.1293	42.1252	0.0424	1.546	0.4412	1.1048	0.5059	0.265	0.7146	0.4579	0.3272	0.5247	0.1717	0.24026	0.2402	251.617	389	111.02	277.979	127.288	66.7836	1363	389	974	446	234	0.6468
2022	09.22	C	15	800	34145	397	1430	1033	432	466	608	986	1189	0.2776	0.722	0.9888	2.602	0.5702	0.7667	0.2333	0.3291	0.6809	33.0935	39.5175	0.0414	1.653	0.4589	1.1941	0.5132	0.279	0.7224	0.4298	0.3105	0.5428	0.1685	0.233295	0.2333	240.169	397	110.216	286.784	123.264	66.907	1430	397	1033	444	241	0.6049
2022	09.22	C	15	900	35877	381	1366	985	414	442	572	927	1120	0.2789	0.721	1.0712	2.585	0.5543	0.7503	0.2497	0.2843	0.6464	36.4626	42.5175	0.0405	1.6171	0.451	1.1661	0.5197	0.291	0.7211	0.4457	0.3214	0.5604	0.1801	0.24977	0.2497	235.607	381	106.267	274.733	122.444	68.6135	1366	381	985	439	246	0.6184
2022	09.22	C	16	900	53301	349	1556	1207	384	414	563	994	1297	0.2243	0.776	1.7613	3.458	0.5344	0.7854	0.2146	0.2486	0.591	44.1987	48.8813	0.0491	1.4257	0.3198	1.1059	0.5149	0.237	0.7757	0.4656	0.3612	0.4609	0.1665	0.214595	0.2146	244.792	349	78.2783	270.722	126.053	58.0919	1556	349	1207	562	259	0.7014
2022	09.22	C	16	700	44924	346	1559	1213	401	441	656	1082	1318	0.2219	0.778	1.0493	3.506	0.6068	0.8013	0.1987	0.3298	0.8519	37.0742	52.0516	0.053	1.8045	0.4005	1.404	0.5521	0.279	0.7781	0.3932	0.306	0.5052	0.1546	0.198645	0.1987	191.743	346	76.7903	269.21	105.864	53.4869	1559	346	1213	477	241	0.5542
2022	09.22	C	16	900	59437	366	1981	1615	410	449	648	1217	1621	0.1848	0.815	2.4365	4.413	0.5269	0.7771	0.2229	0.2415	0.582	36.8423	40.6953	0.0409	1.3549	0.2503	1.1046	0.5225	0.246	0.8152	0.4731	0.3857	0.4712	0.1817	0.222925	0.2229	270.131	366	67.6204	298.38	141.153	66.5119	1981	366	1615	764	360	0.7381
2022	09.22	C	16	800	45920	353	1604	1251	393	426	602	1063	1321	0.2201	0.78	1.5013	3.544	0.5675	0.7738	0.2262	0.2638	0.6635	36.746	42.9565	0.0459	1.4989	0.3299	1.169	0.5055	0.264	0.7799	0.4325	0.3373	0.5231	0.1764	0.226241	0.2262	235.506	353	77.6864	275.314	119.061	62.2812	1604	353	1251	541	283	0.6672
2022	09.22	C	16	900	47636	371	1706	1335	413	451	640	1135	1398	0.2175	0.783	1.4943	3.598	0.5723	0.7693	0.2307	0.2846	0.6717	35.7217	41.9247	0.0397	1.4998	0.3262	1.1736	0.502	0.271	0.7825	0.4277	0.3347	0.5394	0.1805	0.230701	0.2307	247.366	371	80.6805	290.32	124.174	66.9801	1706	371	1335	571	308	0.6668
2022	09.22	C	16	700	35430	365	1398	1033	400	430	575	962	1181	0.2611	0.739	1.0854	2.83	0.5779	0.7899	0.2101	0.2904	0.6776	34.3375	40.2618	0.0491	1.5868	0.4143	1.1725	0.4949	0.246	0.7389	0.4221	0.3119	0.4977	0.1552	0.210079	0.2101	230.023	365	95.2969	269.703	113.834	56.6559	1398	365	1033	436	217	0.6302
2022	09.22	C	16	700	32352	337	1415	1078	379	415	588	1005	1195	0.2382	0.762	0.9952	3.199	0.6197	0.7959	0.2041	0.334	0.7761	30.0501	37.6376	0.0429	1.644	0.3915	1.2525	0.4764	0.256	0.7618	0.3803	0.2898	0.5366	0.1555	0.204069	0.2041	204.988	337	80.2608	256.739	97.6466	52.3958	1415	337	1078	410	220	0.6083
2022	09.22	C	16	900	46437	376	1651	1275	416	443	623	1092	1357	0.2277	0.772	1.4816	3.391	0.5616	0.7694	0.2306	0.2118	0.6458	36.4602	41.9258	0.0405	1.489	0.3391	1.1499	0.5042	0.265	0.7723	0.4384	0.3386	0.5259	0.1781	0.230555	0.2306	252.518	376	85.6305	290.37	127.307	66.9558	1651	376	1275	559	294	0.6716
2022	09.22	C	16	800	50411	373	1728	1355	418	456	648	1139	1410	0.2159	0.784	1.5253	3.633	0.5653	0.7653	0.2347	0.2804	0.6765	37.2431	44.5685	0.0466	1.5261	0.3294	1.1967	0.5202	0.281	0.7841	0.4347	0.3409	0.5399	0.184	0.234695	0.2347	244.414	373	80.5145	292.486	127.139	68.6424	1728	373	1355	589	318	0.6553
2022	09.22	CS	17	800	34441	347	1693	1346	422	488	784	1230	1433	0.205	0.795	0.8169	3.879	0.656	0.8068	0.1932	0.4903	1.0822	25.6262	42.2749	0.032	2.075	0.4253	1.6497	0.5675	0.319	0.795	0.344	0.2735	0.5616	0.1536	0.19319	0.1932	167.229	347	71.1217	275.878	94.8972	53.29	1693	347	1346	463	260	0.4819
2022	09.22	CS	17	900	58684	363	1662	1299	407	448	638	1117	1377	0.2184	0.782	1.3857	3.579	0.5804	0.7806	0.2194	0.3156	0.7057	45.2157	54.9704	0.0502	1.5555	0.3397	1.2157	0.5101	0.267	0.7816	0.4196	0.3279	0.5229	0.1715	0.219409	0.2194	233.365	363	79.2834	283.717	119.034	62.2473	1662	363	1299	545	285	0.6429
2022	09.22	CS	17	900	51301	310	1619	1309	345	374	531	1051	1333	0.1915	0.809	2.1936	4.223	0.5661	0.7815	0.2185	0.2215	0.5628	39.1912	38.962	0.0435	1.2296	0.2354	0.9942	0.4314	0.217	0.8085	0.4339	0.3508	0.5035	0.1767	0.218469	0.2185	252.115	310	59.3576	250.642	108.758	54.7622	1619	310	1309	568	286	0.8133
2022	09.22	CS	17	800	30487	331	1477	1146	417	493	796	1117	1261	0.2241	0.776	0.5199	3.462	0.6859	0.8115	0.1885	0.6632	1.3525	26.6406	52.5356	0.0333	2.5416	0.5696	1.972	0.6195	0.372	0.7759	0.3141	0.2437	0.6	0.1462	0.18846	0.1885	130.233	331	74.1781	256.822	80.677	48.4062	1477	331	1146	360	216	0.3935
2022	09.22	CS	17	900	37051	355	1439	1084	424	486	746	1104	1245	0.2467	0.753	0.4927	3.054	0.691	0.821	0.179	0.572	1.2023	34.2178	59.5423	0.038	2.31	0.5699	1.7401	0.5378	0.311	0.7533	0.309	0.2328	0.5791	0.1348	0.178942	0.179	153.68	355	87.5782	267.422	82.6442	47.8596	1439	355	1084	335	194	0.4329
2022	09.22	CS	17	900	41169	344	1595	1251	426	502	806	1188	1362	0.2157	0.784	0.6282	3.637	0.6747	0.8137	0.1863	0.6075	1.231	32.9471	60.1167	0.0366	2.3264	0.5017	1.8246	0.5936	0.34	0.7843	0.3253	0.2552	0.5725	0.1461	0.186234	0.1863	147.868	344	74.1918	269.808	87.7793	50.252	1595	344	1251	407	233	0.4299
2022	09.22	CS	17	900	45094	331	1560	1229	386	435	671	1118	1316	0.2122	0.788	0.9507	3.713	0.6404	0.8015	0.1985	0.3987	0.9222	36.7304	52.8943	0.0408	1.8279	0.3878	1.4401	0.5179	0.286	0.7878	0.3596	0.2833	0.552	0.1564	0.198499	0.1985	181.082	331	70.2314	260.769	93.7833	51.7718	1560	331	1229	442	244	0.5471
2022	09.22	CS	17	900	44374	341	1755	1414	418	484	808	1268	1483	0.1943	0.806	0.871	4.147	0.6556	0.8076	0.1924	0.4668	1.1009	31.42	52.7621	0.0349	2.0842	0.405	1.6793	0.5784	0.323	0.8057	0.3444	0.2775	0.5585	0.155	0.192347	0.1924	163.612	341	66.257	274.743	94.6251	52.8501	1755	341	1414	487	272	0.4798
2022	09.22	CS	17	900	43827	343	1579	1236	397	446	681	1131	1326	0.2172	0.783	0.9347	3.603	0.6375	0.7953	0.2047	0.3964	0.9115	35.4976	50.7537	0.0394	1.8266	0.3968	1.4298	0.5182	0.293	0.7828	0.3625	0.2837	0.5647	0.1602	0.204704	0.2047	187.781	343	74.5085	268.491	97.3173	54.9582	1579	343	1236	448	253	0.5475
2022	09.22	CS	18	900	29955	363	1486	1123	465	570	872	1166	1308	0.2443	0.756	0.3675	3.094	0.715	0.8415	0.1585	0.935	1.5108	26.7114	56.4388	0.0297	2.7959	0.683	2.1129	0.6021	0.335	0.7557	0.285	0.2153	0.5562	0.1198	0.158517	0.1585	129.833	363	88.6736	274.326	78.1696	43.4818	1486	363	1123	320	178	0.3577
2022	09.22	CS	18	900	31943	356	1434	1078	416	471	707	1105	1259	0.2483	0.752	0.5334	3.028	0.6948	0.8377	0.1623	0.5102	1.0853	29.6701	46.3471	0.033	2.0779	0.5159	1.5621	0.4767	0.254	0.7517	0.3052	0.2294	0.5319	0.122	0.162336	0.1623	171.327	356	88.3794	267.621	81.6764	43.4449	1434	356	1078	329	175	0.4812
2022	09.22	CS	18	900	32904	352	1538	1186	452	547	867	1200	1357	0.2289	0.771	0.4263	3.369	0.715	0.8474	0.1526	0.801	1.4474	27.7816	56.2403	0.0309	2.6252	0.6008	2.0244	0.5769	0.309	0.7711	0.285	0.2198	0.5355	0.1177	0.152617	0.1526	134.085	352	80.5618	271.438	77.3576	41.4252	1538	352	1186	338	181	0.3809
2022	09.22	CS	18	900	43914	354	1459	1105	423	483	738	1099	1252	0.2426	0.757	0.5541	3.121	0.6742	0.8127	0.1873	0.543	1.1584	39.7797	68.3463	0.0442	2.2685	0.5504	1.7181	0.5597	0.322	0.7574	0.3258	0.2467	0.575	0.1419	0.187335	0.1873	156.05	354	85.8917	268.108	87.3475	50.2248	1459	354	1105	360	207	0.4408
2022	09.22	CS	18	900	43228	364	1599	1235	441	507	788	1199	1372	0.2276	0.772	0.618	3.393	0.6761	0.8162	0.1838	0.5344	1.1444	35.0027	59.2461	0.0389	2.1915	0.4989	1.6926	0.5482	0.311	0.7724	0.3239	0.2502	0.5675	0.142	0.183813	0.1838	166.096	364	82.8618	281.138	91.0569	51.6748	1599	364	1235	400	227	0.4563
2022	09.22	CS	18	900	31868	395	1376	981	459	517	744	1076	1219	0.2871	0.713	0.3805	2.484	0.6942	0.84	0.16	0.5912	1.1859	32.523	55.5582	0.0361	2.3961	0.6878	1.7083	0.5224	0.273	0.7129	0.3058	0.218	0.5233	0.1141	0.160025	0.16	164.851	395	113.39	281.61	86.1192	45.069	1376	395	981	300	157	0.4173
2022	09.22	CS	18	900	19685	278	1198	920	362	427	702	967	1070	0.2321	0.768	0.3461	3.309	0.7489	0.8609	0.1391	0.7065	1.5362	21.4345	43.9683	0.0238	2.6711	0.6198	2.0513	0.5151	0.285	0.7679	0.2511	0.1928	0.5541	0.1068	0.139135	0.1391	104.077	278	64.5109	213.489	53.6043	29.7028	1198	278	920	231	128	0.3744
2022	09.22	CS	18	900	34475	378	1381	1003	438	490	712	1052	1209	0.2737	0.726	0.4746	2.653	0.672	0.8285	0.1715	0.5184	1.11	34.4098	56.8392	0.0382	2.2744	0.6225	1.6518	0.5418	0.283	0.7263	0.328	0.2382	0.5228	0.1245	0.171478	0.1715	166.198	378	103.464	274.536	90.0521	47.0789	1381	378	1003	329	172	0.4397
2022	09.22	CS	18	900	28126	372	1467	1095	412	449	588	845	1196	0.2536	0.746	1.5817	2.944	0.432	0.7525	0.2475	0.3379	0.6575	25.7246	39.158	0.0286	2.0393	0.5171	1.5222	0.8647	0.377	0.7464	0.568	0.424	0.4357	0.1847	0.247478	0.2475	182.416	372	94.3313	277.669	157.726	68.7198	1467	372	1095	622	271	0.4904
2022	09.22	CS	19	900	55254	333	2170	1837	410	480	815	1460	1786	0.1535	0.847	1.7198	5.517	0.6135	0.791	0.209	0.3811	0.8746	30.1173	42.9356	0.0335	1.684	0.2584	1.4256	0.551	0.298	0.8465	0.3865	0.3272	0.5408	0.177	0.209019	0.209	197.743	333	51.1009	281.899	108.954	58.9272	2170	333	1837	710	384	0.5938
2022	09.22	CS	19	900	54889	348	2152	1804	435	518	875	1491	1797	0.1617	0.838	1.3626	5.184	0.6336	0.8032	0.1968	0.4601	0.9738	30.4648	46.821	0.0338	1.8334	0.2965	1.5369	0.5631	0.302	0.8383	0.3664	0.3072	0.5371	0.165	0.196793	0.1968	189.811	348	56.2751	291.725	106.89	57.4071	2152	348	1804	661	355	0.5454
2022	09.22	CS	19	800	37513	314	2101	1787	421	510	932	1529	1790	0.1495	0.851	1.1201	5.691	0.6799	0.826	0.174	0.498	1.1528	21.0305	35.6567	0.0263	1.9934	0.2979	1.6955	0.5427	0.295	0.8505	0.3201	0.2723	0.5437	0.148	0.174038	0.174	157.52	314	46.9281	267.072	85.4869	46.4798	2101	314	1787	572	311	0.5017
2022	09.22	CS	19	900	37312	347	1625	1278	409	463	717	1169	1361	0.2135	0.786	0.8924	3.683	0.6432	0.7934	0.2066	0.4225	0.965	29.2342	43.8631	0.0325	1.9078	0.4074	1.5004	0.5354	0.31	0.7865	0.3568	0.2806	0.5789	0.1625	0.206552	0.2066	181.885	347	74.0978	272.902	97.3735	56.3742	1625	347	1278	456	264	0.5242
2022	09.22	CS	19	700	27780	300	1675	1375	377	446	761	1236	1443	0.1791	0.821	0.8957	4.583	0.6807	0.8313	0.1687	0.5018	1.1176	20.2419	33.2318	0.0289	1.9999	0.3582	1.6417	0.5242	0.277	0.8209	0.3193	0.2621	0.5285	0.1385	0.16875	0.1687	150.008	300	53.7313	246.269	78.6269	41.5522	1675	300	1375	439	232	0.5
2022	09.22	CS	19	900	38049	373	1481	1108	432	487	732	1118	1269	0.2519	0.748	0.5618	2.971	0.6724	0.8087	0.1913	0.4964	1.08	34.3784	55.2207	0.0382	2.147	0.5407	1.6063	0.5262	0.307	0.7481	0.3276	0.2451	0.584	0.1431	0.191318	0.1913	173.731	373	93.9426	279.057	91.424	53.3937	1481	373	1108	363	212	0.4658
2022	09.22	CS	19	900	31177	375	1500	1125	443	514	774	1131	1293	0.25	0.75	0.5202	3	0.672	0.816	0.184	0.6311	1.1822	27.7507	48.8207	0.0308	2.3457	0.5864	1.7593	0.577	0.324	0.75	0.328	0.246	0.561	0.138	0.184008	0.184	159.867	375	93.75	281.25	92.25	51.75	1500	375	1125	369	207	0.4263
2022	09.22	CS	19	900	47370	343	1850	1507	414	474	772	1308	1548	0.1854	0.815	1.1304	4.394	0.6403	0.7996	0.2004	0.3981	0.9489	31.4718	46.637	0.035	1.8191	0.3373	1.4819	0.533	0.297	0.8146	0.3597	0.293	0.5572	0.1632	0.200425	0.2004	188.555	343	63.5941	279.406	100.49	55.9924	1850	343	1507	542	302	0.5497
2022	09.22	CS	19	900	47991	368	1543	1175	419	460	667	1109	1310	0.2385	0.762	0.8823	3.193	0.6306	0.8017	0.1983	0.3489	0.8482	40.8824	54.9881	0.0454	1.7663	0.4213	1.345	0.4968	0.267	0.7615	0.3694	0.2813	0.5369	0.151	0.198331	0.1983	208.345	368	87.7667	280.233	103.507	55.5697	1543	368	1175	434	233	0.5662
2022	09.22	CS	20	900	53899	357	1866	1509	431	495	798	1304	1552	0.1913	0.809	1.089	4.227	0.6276	0.7919	0.2081	0.4241	0.9742	35.7569	55.5043	0.0397	1.9195	0.3672	1.5523	0.5781	0.323	0.8087	0.3724	0.3012	0.5587	0.1683	0.20806	0.2081	185.986	357	68.3006	288.699	107.521	60.074	1866	357	1509	562	314	0.521
2022	09.22	CS	20	900	45963	392	1501	1109	449	503	729	1107	1282	0.2612	0.739	0.6109	2.829	0.6447	0.8025	0.1975	0.4869	1.0129	41.4841	65.1755	0.0461	2.1264	0.5553	1.5711	0.5582	0.31	0.7388	0.3553	0.2625	0.5558	0.1459	0.197476	0.1975	184.349	392	102.374	289.626	102.897	57.1939	1501	392	1109	394	219	0.4703
2022	09.22	CS	20	900	41300	362	1726	1364	445	519	830	1274	1480	0.2097	0.79	0.719	3.768	0.6686	0.8196	0.1804	0.5425	1.1437	30.3168	51.8576	0.0337	2.1645	0.454	1.7105	0.5668	0.308	0.7903	0.3314	0.2619	0.5442	0.1425	0.180348	0.1804	167.244	362	75.9235	286.077	94.7995	51.5944	1726	362	1364	452	246	0.462
2022	09.22	CS	20	900	43105	344	1561	1217	418	481	766	1147	1327	0.2204	0.78	0.6765	3.538	0.6598	0.8077	0.1923	0.5177	1.1558	35.457	62.1123	0.0394	2.2469	0.4952	1.7518	0.5959	0.337	0.7796	0.3402	0.2652	0.5652	0.1499	0.192281	0.1923	153.1	344	75.8078	268.192	91.2338	51.5669	1561	344	1217	414	234	0.4451
2022	09.22	CS	20	900	49273	358	1603	1245	409	453	670	1127	1327	0.2233	0.777	1.0302	3.478	0.6177	0.7783	0.2217	0.3534	0.8353	39.6156	53.5764	0.044	1.7413	0.3889	1.3524	0.5171	0.3	0.7767	0.3823	0.2969	0.5798	0.1722	0.221658	0.2217	205.594	358	79.9526	278.047	106.306	61.6394	1603	358	1245	476	276	0.5743
2022	09.22	CS	20	900	29379	339	1257	918	391	437	636	957	1077	0.2697	0.73	0.4994	2.708	0.6732	0.8039	0.1961	0.5011	1.0784	32.0419	51.3292	0.0356	2.1935	0.5916	1.6019	0.5235	0.314	0.7303	0.3268	0.2387	0.6	0.1432	0.19608	0.1961	154.548	339	91.4248	247.575	80.9069	48.5442	1257	339	918	300	180	0.4559
2022	09.22	CS	20	900	35799	352	1367	1015	411	461	686	1044	1189	0.2575	0.743	0.5176	2.884	0.6818	0.8246	0.1754	0.4926	1.0969	35.3087	56.8069	0.0392	2.1668	0.558	1.6089	0.512	0.282	0.7425	0.3182	0.2363	0.5511	0.1302	0.17536	0.1754	162.452	352	90.6394	261.361	83.1719	45.8347	1367	352	1015	323	178	0.4615
2022	09.22	CS	20	800	32878	305	1374	1069	358	405	627	1017	1181	0.222	0.778	0.7558	3.505	0.666	0.8195	0.1805	0.4397	1.0041	30.7943	46.4221	0.0385	1.9376	0.4301	1.5075	0.5034	0.272	0.778	0.334	0.2598	0.5406	0.1405	0.18056	0.1805	157.411	305	67.7038	237.296	79.2467	42.8421	1374	305	1069	357	193	0.5161
2022	09.22	CS	20	900	36702	395	1372	977	443	486	677	1016	1180	0.2879	0.712	0.5559	2.473	0.6356	0.8035	0.1965	0.4401	0.9621	37.6045	56.9215	0.0418	2.1257	0.612	1.5137	0.5516	0.297	0.7121	0.3644	0.2595	0.5393	0.1399	0.196521	0.1965	185.821	395	113.721	281.279	102.493	55.277	1372	395	977	356	192	0.4704
2022	09.22	CS	21	900	61434	333	1663	1330	379	420	621	1107	1382	0.2002	0.8	1.5417	3.994	0.582	0.7887	0.2113	0.3083	0.7218	46.2301	57.3397	0.0514	1.5509	0.3105	1.2403	0.5185	0.262	0.7998	0.418	0.3343	0.5054	0.169	0.211257	0.2113	214.714	333	66.6801	266.32	111.334	56.2676	1663	333	1330	556	281	0.6448
2022	09.22	CS	21	900	50756	361	1922	1561	445	515	840	1340	1609	0.1878	0.812	1.0668	4.324	0.6272	0.7995	0.2005	0.4484	1.0228	32.5537	53.0923	0.0362	2.0081	0.3772	1.6309	0.6081	0.327	0.8122	0.3728	0.3028	0.5378	0.1629	0.200492	0.2005	179.772	361	67.8049	293.195	109.314	58.7893	1922	361	1561	582	313	0.498
2022	09.22	CS	21	900	46455	362	1576	1214	402	441	621	1073	1334	0.2297	0.77	1.2542	3.354	0.5857	0.8007	0.1993	0.3213	0.7111	38.3054	46.5124	0.0426	1.5763	0.3621	1.2143	0.5031	0.242	0.7703	0.4143	0.3192	0.4811	0.1536	0.19932	0.1993	229.652	362	83.1497	278.85	115.537	55.5863	1576	362	1214	503	242	0.6344
2022	09.22	CS	21	900	43485	406	1496	1090	463	515	723	1041	1249	0.2714	0.729	0.7019	2.685	0.5826	0.7734	0.2266	0.4771	0.9694	39.9327	66.4498	0.0444	2.2839	0.6198	1.664	0.6946	0.377	0.7286	0.4174	0.3041	0.5429	0.1651	0.226606	0.2266	177.766	406	110.184	295.815	123.483	67.0334	1496	406	1090	455	247	0.4379
2022	09.22	CS	21	900	36022	325	1277	952	360	391	538	897	1079	0.2545	0.745	0.974	2.929	0.6008	0.792	0.208	0.3256	0.7458	37.877	47.0151	0.0421	1.665	0.4237	1.2413	0.4955	0.258	0.7455	0.3992	0.2976	0.5211	0.1551	0.208023	0.208	195.195	325	82.7134	242.287	96.711	50.3915	1277	325	952	380	198	0.6006
2022	09.22	CS	21	900	36730	397	1414	1017	440	485	658	1020	1208	0.2808	0.719	0.6953	2.562	0.6126	0.7974	0.2026	0.4425	0.8555	36.1544	50.4885	0.0402	1.9416	0.5451	1.3965	0.541	0.283	0.7192	0.3874	0.2786	0.5228	0.1457	0.202533	0.2026	204.471	397	111.463	285.537	110.621	57.8373	1414	397	1017	394	206	0.515
2022	09.22	CS	21	900	28068	361	1264	903	402	441	609	937	1085	0.2856	0.714	0.5891	2.501	0.6379	0.8018	0.1982	0.4319	0.9155	31.1218	44.6656	0.0346	2.0089	0.5738	1.4352	0.5197	0.284	0.7144	0.3621	0.2587	0.5474	0.1416	0.198214	0.1982	179.7	361	103.102	257.898	93.3916	51.1226	1264	361	903	327	179	0.4978
2022	09.22	CS	21	900	30606	370	1245	875	411	447	618	941	1081	0.2972	0.703	0.5093	2.365	0.6526	0.8126	0.1874	0.4114	0.9448	35.0171	50.6961	0.0389	2.0599	0.6122	1.4478	0.503	0.271	0.7028	0.3474	0.2442	0.5395	0.1317	0.187422	0.1874	179.62	370	109.96	260.04	90.3454	48.739	1245	370	875	304	164	0.4854
2022	09.22	CS	21	900	45781	382	1572	1190	422	460	634	1068	1316	0.243	0.757	1.1791	3.115	0.5765	0.7849	0.2151	0.3193	0.7059	38.5103	47.1555	0.0428	1.6176	0.3931	1.2245	0.5186	0.263	0.757	0.4235	0.3206	0.5079	0.1628	0.215096	0.2151	236.152	382	92.827	289.173	122.473	62.2087	1572	382	1190	504	256	0.6182
2022	09.22	CS	22	900	43485	325	1899	1574	410	483	821	1336	1603	0.1711	0.829	1.1391	4.843	0.6423	0.8119	0.1881	0.4638	1.0504	27.6657	45.243	0.0307	1.973	0.3377	1.6353	0.5849	0.308	0.8289	0.3577	0.2965	0.5258	0.1559	0.188079	0.1881	164.724	325	55.6214	269.379	96.3533	50.6582	1899	325	1574	563	296	0.5068
2022	09.22	CS	22	800	31255	293	1383	1090	346	397	624	1015	1205	0.2119	0.788	0.8149	3.72	0.6624	0.8367	0.1633	0.4679	1.0122	28.7127	43.8777	0.0359	1.9389	0.4108	1.5282	0.5159	0.25	0.7881	0.3376	0.2661	0.4837	0.1287	0.163297	0.1633	151.117	293	62.0745	230.925	77.9638	37.7108	1383	293	1090	368	178	0.5157
2022	09.22	CS	22	900	52251	355	1638	1283	404	446	651	1124	1379	0.2167	0.783	1.2289	3.614	0.5994	0.7981	0.2019	0.3274	0.769	40.7644	52.3029	0.0453	1.6381	0.355	1.2831	0.514	0.259	0.7833	0.4006	0.3138	0.5039	0.1581	0.201862	0.2019	216.714	355	76.9383	278.062	111.398	56.1325	1638	355	1283	514	259	0.6105
2022	09.22	CS	22	900	32092	369	1314	945	418	464	659	991	1137	0.2808	0.719	0.5128	2.561	0.6582	0.8127	0.1873	0.4868	1.0229	33.998	52.8371	0.0378	2.161	0.6068	1.5541	0.5312	0.291	0.7192	0.3418	0.2458	0.548	0.1347	0.187306	0.1873	170.754	369	103.623	265.377	90.7055	49.7055	1314	369	945	323	177	0.4628
2022	09.22	CS	22	900	28485	333	1284	951	395	454	694	1007	1128	0.2593	0.741	0.4058	2.856	0.7087	0.836	0.164	0.6204	1.2653	29.9904	53.5436	0.0333	2.4105	0.6252	1.7854	0.52	0.293	0.7407	0.2913	0.2157	0.5632	0.1215	0.16406	0.164	138.146	333	86.3621	246.638	71.8388	40.4579	1284	333	951	277	156	0.4148
2022	09.22	CS	22	900	32786	379	1380	1001	432	480	679	1017	1190	0.2746	0.725	0.5795	2.641	0.6374	0.8102	0.1898	0.4795	0.999	32.7913	51.3971	0.0364	2.1608	0.5935	1.5674	0.5684	0.298	0.7254	0.3626	0.263	0.5234	0.1377	0.189785	0.1898	175.398	379	104.088	274.912	99.6935	52.1812	1380	379	1001	363	190	0.4628
2022	09.22	CS	22	900	29208	400	1310	910	453	503	701	1006	1144	0.3053	0.695	0.399	2.275	0.6659	0.8176	0.1824	0.5495	1.1026	32.1354	53.2055	0.0357	2.3834	0.7278	1.6557	0.5531	0.302	0.6947	0.3341	0.2321	0.5461	0.1267	0.182452	0.1824	167.827	400	122.137	277.863	92.8244	50.687	1310	400	910	304	166	0.4196
2022	09.22	CS	22	900	30813	387	1290	903	450	509	724	1001	1130	0.3	0.7	0.3502	2.333	0.68	0.8228	0.1772	0.6534	1.244	34.1611	62.4988	0.038	2.6136	0.7841	1.8295	0.5855	0.324	0.7	0.32	0.224	0.5536	0.124	0.177152	0.1772	148.072	387	116.1	270.9	86.7	48	1290	387	903	289	160	0.3826
2022	09.22	CS	22	900	35308	359	1384	1025	404	443	612	993	1156	0.2594	0.741	0.817	2.855	0.6185	0.7776	0.2224	0.3805	0.8228	34.4861	45.8726	0.0383	1.7961	0.4659	1.3302	0.5074	0.296	0.7406	0.3815	0.2825	0.5831	0.1647	0.222453	0.2224	199.878	359	93.1221	265.878	101.423	59.1416	1384	359	1025	391	228	0.5568
2022	09.22	CS	23	900	40913	407	1277	870	444	480	621	896	1107	0.3187	0.681	0.6482	2.138	0.5621	0.8046	0.1954	0.4138	0.8199	47.0652	68.6568	0.0523	2.1412	0.6824	1.4588	0.6388	0.285	0.6813	0.4379	0.2984	0.4462	0.1331	0.195391	0.1954	190.08	407	129.717	277.283	121.431	54.1817	1277	407	870	381	170	0.467
2022	09.22	CS	23	900	52484	358	1896	1538	403	443	645	1187	1550	0.1888	0.811	2.1523	4.296	0.539	0.775	0.225	0.2601	0.622	34.1642	39.4255	0.038	1.4226	0.2686	1.154	0.532	0.26	0.8112	0.461	0.3739	0.488	0.1825	0.224968	0.225	251.652	358	67.597	290.403	133.872	65.3312	1896	358	1538	709	346	0.7029
2022	09.22	CS	23	900	46116	382	1622	1240	432	477	679	1129	1386	0.2355	0.764	1.0298	3.246	0.6024	0.8097	0.1903	0.3629	0.7984	37.2289	49.3395	0.0414	1.7336	0.4083	1.3253	0.5269	0.252	0.7645	0.3976	0.3039	0.4787	0.1455	0.190331	0.1903	220.351	382	89.9655	292.034	116.107	55.5808	1622	382	1240	493	236	0.5768
2022	09.22	CS	23	900	42988	361	1631	1270	428	487	749	1161	1349	0.2213	0.779	0.8296	3.518	0.6299	0.778	0.222	0.4646	1.0184	33.8873	54.7844	0.0377	2.0762	0.4595	1.6167	0.5983	0.359	0.7787	0.3701	0.2882	0.6	0.1729	0.22206	0.222	173.875	361	79.9025	281.098	104.028	62.4169	1631	361	1270	470	282	0.4816
2022	09.22	CS	23	900	49427	354	1669	1315	402	444	651	1125	1348	0.2121	0.788	1.3402	3.715	0.5863	0.7559	0.2441	0.3194	0.7529	37.626	48.3135	0.0418	1.6297	0.3457	1.284	0.5312	0.313	0.7879	0.4137	0.3259	0.5901	0.1923	0.244124	0.2441	217.218	354	75.0845	278.916	115.384	68.0851	1669	354	1315	544	321	0.6136
2022	09.22	CS	23	800	38295	317	1566	1249	372	432	679	1090	1281	0.2024	0.798	1.033	3.94	0.6189	0.7718	0.2282	0.4804	0.9661	30.6991	47.9218	0.0384	1.9572	0.3962	1.561	0.5949	0.356	0.7976	0.3811	0.304	0.5987	0.182	0.228165	0.2282	161.966	317	64.1692	252.831	96.355	57.6916	1566	317	1249	476	285	0.5109
2022	09.22	CS	23	800	47442	377	1563	1186	420	461	647	1078	1288	0.2412	0.759	1.072	3.146	0.5911	0.7681	0.2319	0.3457	0.7589	40.0406	51.4074	0.0501	1.692	0.4081	1.2839	0.525	0.298	0.7588	0.4089	0.3103	0.567	0.1759	0.231846	0.2319	222.813	377	90.9335	286.067	116.983	66.3308	1563	377	1186	485	275	0.591
2022	09.22	CS	23	900	43950	340	1870	1530	416	480	791	1313	1560	0.1818	0.818	1.1368	4.5	0.6359	0.7974	0.2026	0.4183	0.9826	28.7638	44.4415	0.032	1.8884	0.3433	1.545	0.5625	0.313	0.8182	0.3641	0.2979	0.5566	0.1658	0.202658	0.2026	180.047	340	61.8182	278.182	101.273	56.3636	1870	340	1530	557	310	0.5296
2022	09.22	CS	23	875	45201.9	362	1636.75	1274.75	414.625	463	682.75	1122.38	1358.62	0.225225	0.77475	1.15524	3.56238	0.5957	0.782563	0.217438	0.38315	0.8399	36.1844	50.5363	0.0414625	1.81761	0.414013	1.40359	0.5637	0.3045	0.774775	0.4043	0.312812	0.540663	0.16875	0.217443	0.217438	202.25	362	82.3985	279.602	113.179	60.7477	1636.75	362	1274.75	514.375	278.125	0.559175
2022	09.22	CS	24	900	45777	364	1829	1465	426	479	739	1240	1545	0.199	0.801	1.2659	4.025	0.598	0.8061	0.1939	0.3618	0.8532	31.2861	44.6434	0.0348	1.7815	0.3545	1.4269	0.5737	0.277	0.801	0.402	0.322	0.4822	0.1553	0.193844	0.1939	204.322	364	72.4418	291.558	117.22	56.5205	1829	364	1465	589	284	0.5613
2022	09.22	CS	24	800	39425	376	1559	1183	423	468	662	1075	1326	0.2412	0.759	1.0101	3.146	0.5909	0.803	0.197	0.3804	0.8059	33.3651	45.5052	0.0417	1.7973	0.4335	1.3639	0.558	0.269	0.7588	0.4091	0.3105	0.4814	0.1495	0.196941	0.197	209.203	376	90.6838	285.316	116.731	56.195	1559	376	1183	484	233	0.5564
2022	09.22	CS	24	900	51760	382	1676	1294	429	470	663	1122	1396	0.2279	0.772	1.2891	3.387	0.5719	0.7836	0.2164	0.3168	0.7239	40.0393	50.6803	0.0445	1.6394	0.3737	1.2658	0.5419	0.274	0.7721	0.4281	0.3305	0.5054	0.1671	0.216362	0.2164	233.012	382	87.0668	294.933	126.27	63.8186	1676	382	1294	554	280	0.61
2022	09.22	CS	24	900	46204	375	1496	1121	417	453	619	1036	1264	0.2507	0.749	1.0557	2.989	0.5897	0.793	0.207	0.3211	0.7255	41.2558	50.7636	0.0458	1.6421	0.4116	1.2305	0.5049	0.255	0.7493	0.4103	0.3075	0.5043	0.1551	0.206914	0.207	228.366	375	94.0007	280.999	115.308	58.1551	1496	375	1121	460	232	0.609
2022	09.22	CS	24	900	52759	374	1569	1195	409	452	624	1060	1295	0.2384	0.762	1.2387	3.195	0.5741	0.7707	0.2293	0.3598	0.6974	44.1884	53.6788	0.0491	1.595	0.3802	1.2148	0.5174	0.279	0.7616	0.4259	0.3244	0.5383	0.1746	0.229262	0.2293	234.483	374	89.1498	284.85	121.329	65.3129	1569	374	1195	509	274	0.627
2022	09.22	CS	24	900	40715	377	1393	1016	411	458	634	1005	1176	0.2706	0.729	0.7419	2.695	0.6181	0.7864	0.2136	0.4626	0.8432	40.1128	54.7187	0.0446	1.8703	0.5062	1.3641	0.5209	0.291	0.7294	0.3819	0.2785	0.5593	0.1558	0.213597	0.2136	201.572	377	102.031	274.969	105.008	58.7286	1393	377	1016	388	217	0.5347
2022	09.22	CS	24	900	53554	361	1796	1435	409	452	670	1195	1468	0.201	0.799	1.5444	3.975	0.5812	0.7714	0.2286	0.2997	0.7178	37.3587	46.1385	0.0415	1.5457	0.3107	1.235	0.5172	0.282	0.799	0.4188	0.3346	0.5458	0.1826	0.228581	0.2286	233.551	361	72.5618	288.438	120.802	65.9287	1796	361	1435	601	328	0.647
2022	09.22	CS	24	900	51446	369	1528	1159	414	454	635	1063	1265	0.2415	0.759	1.0412	3.141	0.5988	0.7731	0.2269	0.3451	0.765	44.4272	56.761	0.0494	1.6844	0.4068	1.2776	0.5126	0.29	0.7585	0.4012	0.3043	0.5656	0.1721	0.226919	0.2269	219.069	369	89.1106	279.889	112.294	63.5124	1528	369	1159	465	263	0.5937
2022	09.22	CS	24	887.5	47705	372.25	1605.75	1233.5	417.25	460.75	655.75	1099.5	1341.88	0.233788	0.76625	1.14837	3.31913	0.590337	0.785913	0.214087	0.355913	0.766488	39.0042	50.3612	0.043925	1.69446	0.39715	1.29732	0.530825	0.277125	0.766213	0.409663	0.314038	0.522787	0.164013	0.214052	0.214087	220.447	372.25	87.1308	285.119	116.87	61.0215	1605.75	372.25	1233.5	506.25	263.875	0.592388
2022	09.22	AS	25	900	60191	362	1832	1470	431	488	760	1218	1496	0.1976	0.802	1.2567	4.061	0.5823	0.7714	0.2286	0.3878	0.9025	40.9847	63.5198	0.0455	1.9315	0.3817	1.5498	0.6473	0.354	0.8024	0.4177	0.3352	0.5472	0.1834	0.228565	0.2286	187.419	362	71.5306	290.469	121.325	66.393	1832	362	1470	614	336	0.5177
2022	09.22	AS	25	900	37717	354	1822	1468	460	549	901	1330	1561	0.1943	0.806	0.7513	4.147	0.6649	0.8222	0.1778	0.6063	1.2421	25.7306	48.069	0.0286	2.3187	0.4505	1.8682	0.6261	0.332	0.8057	0.3351	0.27	0.5305	0.1432	0.177771	0.1778	152.672	354	68.7794	285.221	95.5917	50.7102	1822	354	1468	492	261	0.4313
2022	09.22	AS	25	900	43118	367	1723	1356	438	506	784	1237	1454	0.213	0.787	0.8472	3.695	0.6416	0.8016	0.1984	0.5015	1.0251	31.8361	50.8645	0.0354	2.0301	0.4324	1.5977	0.5726	0.317	0.787	0.3584	0.2821	0.5535	0.1561	0.198374	0.1984	180.779	367	78.1712	288.829	103.518	57.2972	1723	367	1356	486	269	0.4926
2022	09.22	AS	25	900	41040	363	1364	1001	416	466	665	966	1137	0.2661	0.734	0.6668	2.758	0.6024	0.7732	0.2268	0.4995	1.0057	41.0377	68.5096	0.0456	2.2748	0.6054	1.6694	0.6638	0.379	0.7339	0.3976	0.2918	0.5704	0.1664	0.226791	0.2268	159.574	363	96.6048	266.395	105.919	60.4113	1364	363	1001	398	227	0.4396
2022	09.22	AS	25	900	24663	407	1251	844	462	515	711	973	1101	0.3253	0.675	0.3198	2.074	0.6706	0.8223	0.1777	0.628	1.2006	29.2601	52.3855	0.0325	2.6537	0.8634	1.7903	0.5897	0.318	0.6747	0.3294	0.2222	0.5396	0.1199	0.177744	0.1777	153.371	407	132.413	274.587	90.4444	48.801	1251	407	844	278	150	0.3768
2022	09.22	AS	25	900	25130	341	1247	906	390	432	622	924	1091	0.2735	0.727	0.5547	2.657	0.6435	0.8278	0.1722	0.4636	1.0338	27.7754	44.6248	0.0309	2.2113	0.6047	1.6066	0.5728	0.277	0.7265	0.3565	0.259	0.483	0.1251	0.172189	0.1722	154.208	341	93.2486	247.751	88.3264	42.6592	1247	341	906	323	156	0.4522
2022	09.22	AS	25	900	34794	416	1406	990	466	502	697	1029	1211	0.2959	0.704	0.562	2.38	0.6192	0.803	0.197	0.3636	0.9461	35.184	53.7614	0.0391	2.1701	0.6421	1.528	0.5819	0.301	0.7041	0.3808	0.2681	0.5172	0.1387	0.19695	0.197	191.696	416	123.084	292.916	111.545	57.6956	1406	416	990	377	195	0.4608
2022	09.22	AS	25	900	36556	388	1347	959	443	493	697	997	1155	0.288	0.712	0.4983	2.472	0.635	0.7998	0.2002	0.5214	1.074	38.1576	64.5358	0.0424	2.3756	0.6843	1.6913	0.6173	0.339	0.712	0.365	0.2598	0.5486	0.1425	0.200239	0.2002	163.327	388	111.762	276.238	100.817	55.3051	1347	388	959	350	192	0.421
2022	09.22	AS	25	900	41464	380	1563	1183	428	470	665	1079	1327	0.2431	0.757	1.0004	3.113	0.5909	0.8005	0.1995	0.355	0.803	35.0888	47.6886	0.039	1.7956	0.4366	1.3591	0.556	0.271	0.7569	0.4091	0.3097	0.4876	0.151	0.199477	0.1995	211.628	380	92.3864	287.614	117.671	57.3768	1563	380	1183	484	236	0.5569
2022	09.22	AS	26	900	46028	391	1459	1068	445	492	684	1034	1239	0.268	0.732	0.7251	2.731	0.6021	0.794	0.206	0.4401	0.9145	43.136	65.5202	0.0479	2.075	0.5561	1.5189	0.6044	0.313	0.732	0.3979	0.2913	0.5176	0.1508	0.205953	0.206	188.434	391	104.785	286.215	113.897	58.9582	1459	391	1068	425	220	0.4819
2022	09.22	AS	26	900	55238	383	1662	1279	425	462	632	1095	1362	0.2304	0.77	1.463	3.339	0.5567	0.7654	0.2346	0.2893	0.6489	43.2275	50.3917	0.048	1.5148	0.3491	1.1657	0.5168	0.273	0.7696	0.4433	0.3412	0.5291	0.1805	0.23455	0.2346	252.839	383	88.2605	294.74	130.662	69.1336	1662	383	1279	567	300	0.6601
2022	09.22	AS	26	900	48098	351	1663	1312	406	455	688	1149	1406	0.2111	0.789	1.1245	3.738	0.6082	0.8041	0.1959	0.3735	0.8562	36.6992	51.661	0.0408	1.7843	0.3766	1.4077	0.5515	0.276	0.7889	0.3918	0.3091	0.5	0.1545	0.1959	0.1959	196.716	351	74.0836	276.916	108.487	54.2435	1663	351	1312	514	257	0.5604
2022	09.22	AS	26	900	26804	365	1237	872	416	454	643	947	1078	0.2951	0.705	0.4392	2.389	0.6674	0.8177	0.1823	0.4358	1.0627	30.7768	49.0031	0.0342	2.2587	0.6665	1.5922	0.5295	0.29	0.7049	0.3326	0.2344	0.5483	0.1285	0.182365	0.1823	161.597	365	107.7	257.3	85.5699	46.9159	1237	365	872	290	159	0.4427
2022	09.22	AS	26	900	35271	347	1353	1006	393	431	613	969	1146	0.2565	0.744	0.778	2.899	0.6183	0.7942	0.2058	0.3777	0.8814	35.0992	50.0342	0.039	1.9172	0.4917	1.4255	0.5441	0.293	0.7435	0.3817	0.2838	0.5391	0.153	0.205774	0.2058	180.993	347	88.9941	258.006	98.4834	53.0887	1353	347	1006	384	207	0.5216
2022	09.22	AS	26	900	32615	342	1221	879	387	428	594	921	1049	0.2801	0.72	0.5507	2.57	0.6587	0.8043	0.1957	0.4664	0.9556	37.1435	53.8869	0.0413	2.0152	0.5645	1.4508	0.4951	0.284	0.7199	0.3413	0.2457	0.5733	0.1409	0.195667	0.1957	169.71	342	95.7936	246.206	84.0295	48.1769	1221	342	879	300	172	0.4962
2022	09.22	AS	26	900	30209	377	1297	920	421	462	627	917	1106	0.2907	0.709	0.6578	2.44	0.587	0.7924	0.2076	0.4457	0.9058	32.8742	50.7317	0.0365	2.1756	0.6324	1.5432	0.6374	0.32	0.7093	0.413	0.293	0.5026	0.1473	0.207574	0.2076	173.286	377	109.583	267.417	110.455	55.5181	1297	377	920	380	191	0.4596
2022	09.22	AS	26	900	19949	274	871	597	314	355	496	678	769	0.3146	0.685	0.3246	2.179	0.6767	0.8291	0.1709	0.6868	1.2395	33.4543	61.2777	0.0372	2.6724	0.8407	1.8317	0.5922	0.313	0.6854	0.3233	0.2216	0.5285	0.1171	0.170864	0.1709	102.53	274	86.1952	187.805	60.7141	32.0873	871	274	597	193	102	0.3742
2022	09.22	AS	26	900	35797	361	1392	1031	419	469	678	1037	1203	0.2593	0.741	0.5922	2.856	0.6557	0.8167	0.1833	0.485	1.0249	34.7593	54.3329	0.0386	2.1104	0.5473	1.5631	0.5382	0.287	0.7407	0.3443	0.255	0.5324	0.1358	0.183305	0.1833	171.058	361	93.6214	267.379	92.0654	49.0151	1392	361	1031	355	189	0.4738
2022	09.22	AS	27	900	46104	366	1572	1206	420	466	680	1088	1312	0.2328	0.767	0.9741	3.295	0.5987	0.7844	0.2156	0.3814	0.8679	38.2675	55.4755	0.0425	1.8896	0.44	1.4497	0.5818	0.313	0.7672	0.4013	0.3079	0.5372	0.1654	0.215578	0.2156	193.692	366	85.2137	280.786	112.687	60.5344	1572	366	1206	484	260	0.5292
2022	09.22	AS	27	900	25999	332	1342	1010	391	446	675	1028	1169	0.2474	0.753	0.524	3.042	0.6891	0.8287	0.1713	0.5446	1.132	25.7795	42.3485	0.0286	2.1827	0.54	1.6427	0.5107	0.281	0.7526	0.3109	0.234	0.551	0.1289	0.171306	0.1713	152.105	332	82.1341	249.866	77.6811	42.7988	1342	332	1010	314	173	0.4581
2022	09.22	AS	27	800	38502	334	1780	1446	396	452	712	1168	1481	0.1876	0.812	1.4235	4.329	0.5768	0.7932	0.2068	0.3873	0.8714	26.6654	40.2859	0.0333	1.8598	0.349	1.5108	0.6394	0.312	0.8124	0.4232	0.3438	0.4886	0.168	0.206776	0.2068	179.589	334	62.6719	271.328	114.836	56.1045	1780	334	1446	612	299	0.5377
2022	09.22	AS	27	900	30269	376	1381	1005	439	494	726	1031	1171	0.2723	0.728	0.4863	2.673	0.6517	0.791	0.209	0.5473	1.1609	30.157	53.7148	0.0335	2.4476	0.6664	1.7812	0.6203	0.372	0.7277	0.3483	0.2534	0.6	0.1521	0.20898	0.209	153.62	376	102.372	273.628	95.2933	57.176	1381	376	1005	350	210	0.4086
2022	09.22	AS	27	900	24686	357	1151	794	414	472	678	914	1003	0.3102	0.69	0.2832	2.224	0.7015	0.8136	0.1864	0.7305	1.3476	31.1287	59.7985	0.0346	2.7847	0.8637	1.921	0.5734	0.358	0.6898	0.2985	0.2059	0.6245	0.1286	0.186413	0.1864	128.201	357	110.729	246.271	73.5091	45.9044	1151	357	794	237	148	0.3591
2022	09.22	AS	27	900	17259	341	1224	883	410	475	710	961	1070	0.2786	0.721	0.3329	2.589	0.7022	0.8256	0.1744	0.7361	1.393	19.5842	38.8525	0.0218	2.75	0.7661	1.9839	0.5909	0.346	0.7214	0.2978	0.2149	0.5856	0.1258	0.174392	0.1744	124	341	95.0008	245.999	73.2704	42.9036	1224	341	883	263	154	0.3636
2022	09.22	AS	27	900	20747	325	1084	759	402	481	701	882	947	0.2998	0.7	0.2196	2.335	0.7339	0.8195	0.1805	1.0408	1.6513	27.3716	61.5903	0.0304	3.2137	0.9635	2.2501	0.5989	0.406	0.7002	0.2661	0.1863	0.6782	0.1264	0.180469	0.1805	101.13	325	97.44	227.56	60.5627	41.0747	1084	325	759	202	137	0.3112
2022	09.22	AS	27	900	21650	357	1085	728	419	481	673	881	955	0.329	0.671	0.2208	2.039	0.7198	0.8214	0.1786	0.8516	1.4469	29.7765	59.8561	0.0331	2.9959	0.9858	2.0102	0.5633	0.359	0.671	0.2802	0.188	0.6373	0.1198	0.178571	0.1786	119.163	357	117.465	239.536	67.1226	42.7742	1085	357	728	204	130	0.3338
2022	09.22	AS	27	800	28181	366	1252	886	432	495	726	983	1082	0.2923	0.708	0.32	2.421	0.6964	0.8081	0.1919	0.7111	1.3544	31.8448	61.9348	0.0398	2.7483	0.8034	1.9449	0.5905	0.373	0.7077	0.3036	0.2149	0.632	0.1358	0.191875	0.1919	133.173	366	106.994	259.006	78.6374	49.6965	1252	366	886	269	170	0.3639
2022	09.22	AS	28	900	34874	396	1411	1015	469	543	786	1088	1237	0.2807	0.719	0.3818	2.563	0.6818	0.8286	0.1714	0.7291	1.2808	34.3964	64.6176	0.0382	2.6115	0.7329	1.8786	0.5978	0.322	0.7193	0.3182	0.2289	0.5387	0.1233	0.171414	0.1714	151.637	396	111.138	284.862	90.6506	48.8335	1411	396	1015	323	174	0.3829
2022	09.22	AS	28	900	43330	382	1646	1264	467	545	844	1208	1418	0.2321	0.768	0.6022	3.309	0.6535	0.8196	0.1804	0.6171	1.2184	34.3186	63.9838	0.0381	2.4279	0.5635	1.8644	0.6461	0.336	0.7679	0.3465	0.2661	0.5205	0.1385	0.180353	0.1804	157.338	382	88.6537	293.346	101.65	52.9137	1646	382	1264	438	228	0.4119
2022	09.22	AS	28	800	34597	377	1588	1211	452	523	803	1192	1384	0.2374	0.763	0.5693	3.212	0.673	0.8315	0.1685	0.5863	1.1726	28.6073	49.8434	0.0358	2.2847	0.5424	1.7423	0.5697	0.294	0.7626	0.327	0.2494	0.5152	0.1285	0.16847	0.1685	165.011	377	89.5019	287.498	94.0126	48.4307	1588	377	1211	396	204	0.4377
2022	09.22	AS	28	800	24243	342	1166	824	418	480	719	939	1033	0.2933	0.707	0.2563	2.409	0.7245	0.8386	0.1614	0.7524	1.5251	29.4581	62.0084	0.0368	2.9786	0.8737	2.105	0.5799	0.34	0.7067	0.2755	0.1947	0.5859	0.1141	0.161415	0.1614	114.819	342	100.312	241.688	66.5815	39.0103	1166	342	824	227	133	0.3357
2022	09.22	AS	28	800	29425	366	1367	1001	438	507	759	1040	1189	0.2677	0.732	0.4166	2.735	0.6733	0.8222	0.1778	0.6893	1.3087	29.4339	57.2083	0.0368	2.6543	0.7107	1.9436	0.6349	0.346	0.7323	0.3267	0.2392	0.5443	0.1302	0.177823	0.1778	137.889	366	97.9927	268.007	87.5508	47.6576	1367	366	1001	327	178	0.3768
2022	09.22	AS	28	900	24524	350	1154	804	422	502	706	852	1003	0.3033	0.697	0.3394	2.297	0.6244	0.8122	0.1878	0.995	1.476	30.5399	72.1926	0.0339	3.3929	1.0291	2.3639	0.8879	0.444	0.6967	0.3756	0.2617	0.5	0.1308	0.1878	0.1878	103.157	350	106.153	243.847	91.5945	45.7972	1154	350	804	302	151	0.2947
2022	09.22	AS	28	900	33481	377	1366	989	453	520	755	974	1177	0.276	0.724	0.4924	2.623	0.6036	0.8089	0.1911	0.6775	1.274	33.8916	71.53	0.0377	2.9151	0.8045	2.1106	0.8365	0.403	0.724	0.3964	0.287	0.4821	0.1384	0.191104	0.1911	129.327	377	104.048	272.952	108.187	52.1618	1366	377	989	392	189	0.343
2022	09.22	AS	28	800	20196	392	984	592	459	536	681	792	868	0.3984	0.602	0.1509	1.51	0.6757	0.8041	0.1959	1.3007	1.6273	34.1519	82.2491	0.0427	4.003	1.5947	2.4083	0.7811	0.472	0.6016	0.3243	0.1951	0.6042	0.1179	0.195942	0.1959	97.9266	392	156.163	235.837	76.4878	46.2114	984	392	592	192	116	0.2498
2022	09.22	AS	28	900	31906	368	1351	983	435	498	747	1034	1175	0.2724	0.728	0.4064	2.671	0.6775	0.821	0.179	0.6409	1.2852	32.496	61.6415	0.0361	2.607	0.7101	1.8969	0.6117	0.34	0.7276	0.3225	0.2346	0.5552	0.1303	0.179052	0.179	141.158	368	100.24	267.76	86.3479	47.9408	1351	368	983	317	176	0.3836
2022	09.22	AS	29	900	52774	368	1669	1301	407	441	602	1052	1361	0.2205	0.78	1.8166	3.535	0.5257	0.7633	0.2367	0.2613	0.5995	40.6033	46.302	0.0451	1.4629	0.3226	1.1404	0.5408	0.27	0.7795	0.4743	0.3697	0.4992	0.1845	0.236771	0.2367	251.555	368	81.1408	286.859	136.043	67.9113	1669	368	1301	617	308	0.6836
2022	09.22	AS	29	900	45788	373	1695	1322	421	465	648	1085	1420	0.2201	0.78	1.5329	3.544	0.5386	0.792	0.208	0.3328	0.6934	34.674	44.6412	0.0385	1.6507	0.3633	1.2875	0.5941	0.268	0.7799	0.4614	0.3599	0.4508	0.1622	0.207999	0.208	225.965	373	82.082	290.918	134.236	60.5162	1695	373	1322	610	275	0.6058
2022	09.22	AS	29	900	28734	402	1470	1068	462	524	748	1069	1269	0.2735	0.727	0.5593	2.657	0.6245	0.8118	0.1882	0.5805	1.0799	26.9429	46.5879	0.0299	2.38	0.6509	1.7291	0.6492	0.325	0.7265	0.3755	0.2728	0.5012	0.1367	0.188201	0.1882	168.908	402	109.935	292.065	109.661	54.9673	1470	402	1068	401	201	0.4202
2022	09.22	AS	29	900	25305	329	1384	1055	387	439	679	1048	1219	0.2377	0.762	0.5867	3.207	0.6815	0.8436	0.1564	0.4929	1.1058	24.024	38.9819	0.0267	2.1286	0.506	1.6226	0.5168	0.254	0.7623	0.3185	0.2428	0.4911	0.1192	0.156415	0.1564	154.562	329	78.2088	250.791	79.8728	39.2233	1384	329	1055	336	165	0.4698
2022	09.22	AS	29	900	28229	439	1362	923	490	555	744	982	1178	0.3223	0.678	0.4438	2.103	0.5883	0.8007	0.1993	0.7042	1.1015	30.6228	57.3355	0.034	2.7628	0.8905	1.8723	0.7708	0.373	0.6777	0.4117	0.279	0.4842	0.1351	0.199345	0.1993	158.897	439	141.499	297.502	122.482	59.3069	1362	439	923	380	184	0.3619
2022	09.22	AS	29	900	31429	423	1282	859	460	494	635	919	1105	0.33	0.67	0.5825	2.031	0.5774	0.7939	0.2061	0.3958	0.8227	36.6269	52.1835	0.0407	2.1263	0.7016	1.4247	0.6021	0.294	0.67	0.4226	0.2832	0.4876	0.1381	0.20606	0.2061	198.937	423	139.57	283.43	119.773	58.4017	1282	423	859	363	177	0.4703
2022	09.22	AS	29	900	19820	350	1235	885	416	480	712	982	1103	0.2834	0.717	0.3166	2.529	0.7141	0.8508	0.1492	0.7232	1.3635	22.4334	42.8317	0.0249	2.6644	0.7551	1.9093	0.5458	0.285	0.7166	0.2859	0.2049	0.5217	0.1069	0.149154	0.1492	131.362	350	99.1903	250.81	71.7004	37.4089	1235	350	885	253	132	0.3753
2022	09.22	AS	29	900	17935	432	1057	625	468	495	614	794	939	0.4087	0.591	0.309	1.447	0.5792	0.8112	0.1888	0.432	0.9707	28.7346	48.1557	0.0319	2.8342	1.1584	1.6759	0.7052	0.316	0.5913	0.4208	0.2488	0.4487	0.1116	0.188813	0.1888	152.424	432	176.56	255.44	107.489	48.2271	1057	432	625	263	118	0.3528
2022	09.22	AS	29	900	20195	383	1123	740	421	462	604	844	990	0.3411	0.659	0.4018	1.932	0.623	0.8203	0.1797	0.5541	0.9955	27.3291	43.6712	0.0304	2.425	0.8271	1.598	0.6025	0.287	0.6589	0.377	0.2484	0.4767	0.1184	0.179716	0.1797	157.938	383	130.622	252.378	95.1532	45.3598	1123	383	740	279	133	0.4124
2022	09.22	AS	30	700	15584	421	1011	590	480	550	686	789	913	0.4164	0.584	0.1713	1.401	0.6237	0.8339	0.1661	1.1864	1.4972	26.4515	63.4931	0.0378	4.1132	1.7128	2.4004	0.9032	0.399	0.5836	0.3763	0.2196	0.4414	0.0969	0.166099	0.1661	102.353	421	175.313	245.687	92.4451	40.8091	1011	421	590	222	98	0.2431
2022	09.22	AS	30	700	23096	393	1292	899	466	534	759	1020	1154	0.3042	0.696	0.2957	2.288	0.6974	0.8465	0.1535	0.7564	1.3571	25.7288	50.0624	0.0368	2.7964	0.8506	1.9458	0.5887	0.299	0.6958	0.3026	0.2105	0.5074	0.1068	0.153539	0.1535	140.538	393	119.543	273.457	82.7368	41.9768	1292	393	899	272	138	0.3576
2022	09.22	AS	30	800	37971	454	1510	1056	507	554	744	1008	1295	0.3007	0.699	0.7039	2.326	0.5246	0.7964	0.2036	0.4451	0.9154	35.996	62.8089	0.045	2.4951	0.7502	1.7449	0.8295	0.355	0.6993	0.4754	0.3325	0.4283	0.1424	0.203614	0.2036	181.957	454	136.501	317.499	150.933	64.6424	1510	454	1056	502	215	0.4008
2022	09.22	AS	30	800	41043	377	1542	1165	412	446	594	1001	1308	0.2445	0.756	1.4551	3.09	0.5356	0.7991	0.2009	0.2918	0.6209	35.2688	40.8832	0.0441	1.5343	0.3751	1.1592	0.5383	0.233	0.7555	0.4644	0.3508	0.4325	0.1518	0.200853	0.2009	245.715	377	92.1719	284.828	132.268	57.2101	1542	377	1165	541	234	0.6518
2022	09.22	AS	30	900	20207	417	1373	956	462	505	681	1002	1219	0.3037	0.696	0.5608	2.293	0.6119	0.8389	0.1611	0.4498	0.9205	21.1757	31.8541	0.0235	2.1604	0.6562	1.5043	0.5838	0.242	0.6963	0.3881	0.2702	0.4151	0.1122	0.1611	0.1611	193.02	417	126.649	290.351	112.678	46.772	1373	417	956	371	154	0.4629
2022	09.22	AS	30	900	29148	379	1300	921	417	452	605	950	1128	0.2915	0.708	0.6666	2.43	0.62	0.8132	0.1868	0.38	0.818	31.687	41.8054	0.0352	1.8622	0.5429	1.3193	0.5014	0.246	0.7085	0.38	0.2692	0.4914	0.1323	0.186732	0.1868	203.523	379	110.493	268.507	102.038	50.1446	1300	379	921	350	172	0.537
2022	09.22	AS	30	800	28021	392	1274	882	440	485	666	942	1118	0.3077	0.692	0.4719	2.25	0.6236	0.8231	0.1769	0.5102	1.0355	31.8081	52.8207	0.0398	2.3987	0.738	1.6606	0.6251	0.294	0.6923	0.3764	0.2606	0.4699	0.1224	0.17687	0.1769	163.422	392	120.615	271.385	102.154	48	1274	392	882	332	156	0.4169
2022	09.22	AS	30	900	36898	400	1566	1166	466	525	767	1133	1352	0.2554	0.745	0.6402	2.915	0.6286	0.8165	0.1835	0.506	1.0492	31.6834	52.8777	0.0352	2.2415	0.5725	1.6689	0.6198	0.306	0.7446	0.3714	0.2765	0.4942	0.1367	0.183546	0.1835	178.452	400	102.171	297.829	110.6	54.6616	1566	400	1166	433	214	0.4461
2022	09.22	AS	30	900	41110	357	1324	967	398	436	593	933	1117	0.2696	0.73	0.8194	2.709	0.5957	0.7859	0.2141	0.393	0.8135	42.5522	58.1152	0.0473	1.8699	0.5042	1.3657	0.5522	0.292	0.7304	0.4043	0.2953	0.5294	0.1563	0.214036	0.2141	190.919	357	96.2606	260.739	105.428	55.815	1324	357	967	391	207	0.5348
2022	09.22	AS	31	800	51814	363	1710	1347	404	442	618	1113	1412	0.2123	0.788	1.7108	3.711	0.5568	0.7788	0.2212	0.2821	0.631	38.5053	43.6393	0.0481	1.4388	0.3054	1.1333	0.5023	0.251	0.7877	0.4432	0.3491	0.4992	0.1743	0.221245	0.2212	252.294	363	77.0579	285.942	126.732	63.2596	1710	363	1347	597	298	0.695
2022	09.22	AS	31	900	26258	372	1275	903	402	444	592	927	1108	0.2918	0.708	0.6799	2.427	0.6146	0.8151	0.1849	0.4651	0.8121	29.117	38.4729	0.0324	1.8657	0.5443	1.3213	0.5092	0.244	0.7082	0.3854	0.2729	0.4799	0.131	0.184953	0.1849	199.389	372	108.537	263.464	101.534	48.7247	1275	372	903	348	167	0.536
2022	09.22	AS	31	900	16475	358	1154	796	412	464	660	914	1025	0.3102	0.69	0.3047	2.223	0.6985	0.8379	0.1621	0.6533	1.2647	20.7358	37.5433	0.023	2.6248	0.8143	1.8106	0.5459	0.293	0.6898	0.3015	0.208	0.5375	0.1118	0.162056	0.1621	136.391	358	111.061	246.939	74.4541	40.0191	1154	358	796	240	129	0.381
2022	09.22	AS	31	900	33456	365	1204	839	399	427	557	872	1040	0.3032	0.697	0.6924	2.299	0.6043	0.8045	0.1955	0.3337	0.7628	39.915	50.3859	0.0444	1.8115	0.5492	1.2623	0.4995	0.247	0.6968	0.3957	0.2757	0.494	0.1362	0.195476	0.1955	201.49	365	110.652	254.348	100.648	49.7176	1204	365	839	332	164	0.552
2022	09.22	AS	31	900	27773	314	1467	1153	361	403	602	1025	1231	0.214	0.786	1.1073	3.672	0.6167	0.7953	0.2047	0.3643	0.8326	24.1267	32.5762	0.0268	1.7179	0.3677	1.3502	0.5176	0.276	0.786	0.3833	0.3013	0.5339	0.1609	0.204644	0.2047	182.781	314	67.2093	246.791	94.6067	50.514	1467	314	1153	442	236	0.5821
2022	09.22	AS	31	800	46223	371	1624	1253	418	460	660	1119	1352	0.2284	0.772	1.1383	3.377	0.597	0.7829	0.2171	0.3352	0.7688	36.9291	47.5602	0.0462	1.6692	0.3813	1.2879	0.5191	0.28	0.7716	0.403	0.311	0.5386	0.1675	0.217056	0.2171	222.262	371	84.7543	286.246	115.366	62.1379	1624	371	1253	505	272	0.5991
2022	09.22	AS	31	900	43186	393	1507	1114	432	468	624	1003	1242	0.2608	0.739	1.1429	2.835	0.5476	0.7621	0.2379	0.3232	0.6912	38.8053	48.9837	0.0431	1.7076	0.4453	1.2623	0.5711	0.3	0.7392	0.4524	0.3344	0.5258	0.1758	0.237872	0.2379	230.148	393	102.488	290.512	131.435	69.1075	1507	393	1114	504	265	0.5856
2022	09.22	AS	31	900	40920	403	1460	1057	440	477	632	971	1208	0.276	0.724	1.0137	2.623	0.5374	0.7616	0.2384	0.35	0.7222	38.752	52.0787	0.0431	1.8563	0.5124	1.3439	0.6217	0.32	0.724	0.4626	0.3349	0.5153	0.1726	0.238378	0.2384	217.099	403	111.239	291.761	134.977	69.5589	1460	403	1057	489	252	0.5387
2022	09.22	AS	31	900	47930	394	1579	1185	435	469	633	1068	1297	0.2495	0.75	1.2065	3.008	0.5688	0.762	0.238	0.2869	0.6723	40.4862	47.8546	0.045	1.575	0.393	1.182	0.5097	0.281	0.7505	0.4312	0.3236	0.5519	0.1786	0.237979	0.238	250.159	394	98.3129	295.687	127.507	70.3661	1579	394	1185	511	282	0.6349
2022	09.22	AS	32	900	38068	376	1591	1215	447	512	781	1153	1363	0.2363	0.764	0.6672	3.231	0.6395	0.8123	0.1877	0.535	1.1111	31.3703	54.5044	0.0349	2.2751	0.5377	1.7375	0.6263	0.326	0.7637	0.3605	0.2753	0.5205	0.1433	0.18764	0.1877	165.267	376	88.8598	287.14	103.512	53.8831	1591	376	1215	438	228	0.4395
2022	09.22	AS	32	900	34074	381	1373	992	458	530	785	1049	1188	0.2775	0.723	0.3772	2.604	0.6734	0.8135	0.1865	0.7258	1.3575	34.3867	69.3225	0.0382	2.7902	0.7743	2.016	0.6584	0.376	0.7225	0.3266	0.236	0.571	0.1347	0.186489	0.1865	136.549	381	105.725	275.275	89.9082	51.3365	1373	381	992	324	185	0.3584
2022	09.22	AS	32	900	35143	376	1428	1052	445	509	750	1077	1230	0.2633	0.737	0.4836	2.798	0.6663	0.8118	0.1882	0.6084	1.185	33.4442	59.4776	0.0372	2.414	0.6356	1.7784	0.5934	0.335	0.7367	0.3337	0.2458	0.5641	0.1387	0.18824	0.1882	155.758	376	99.0028	276.997	92.4202	52.1345	1428	376	1052	351	198	0.4142
2022	09.22	AS	32	900	43070	311	1402	1091	347	378	523	927	1166	0.2218	0.778	1.5291	3.508	0.5646	0.7837	0.2163	0.2841	0.6477	39.5162	45.3325	0.0439	1.4742	0.327	1.1472	0.4995	0.248	0.7782	0.4354	0.3388	0.4968	0.1683	0.216307	0.2163	210.962	311	68.9879	242.012	105.367	52.3509	1402	311	1091	475	236	0.6783
2022	09.22	AS	32	900	39879	334	1414	1080	369	406	566	967	1170	0.2362	0.764	1.1896	3.234	0.5861	0.7741	0.2259	0.3426	0.716	36.9637	45.1584	0.0411	1.5995	0.3778	1.2217	0.5056	0.276	0.7638	0.4139	0.3161	0.5459	0.1726	0.225948	0.2259	208.815	334	78.8939	255.106	105.586	57.6351	1414	334	1080	447	244	0.6252
2022	09.22	AS	32	800	54588	364	1733	1369	413	454	657	1146	1414	0.21	0.79	1.488	3.761	0.5712	0.767	0.233	0.2995	0.7134	39.9134	49.8493	0.0499	1.581	0.3321	1.2489	0.5355	0.291	0.79	0.4288	0.3387	0.5434	0.1841	0.23301	0.233	230.234	364	76.4547	287.545	123.294	67.0029	1733	364	1369	587	319	0.6325
2022	09.22	AS	32	900	45643	380	1576	1196	418	452	629	1074	1322	0.2411	0.759	1.2038	3.147	0.5803	0.7876	0.2124	0.2843	0.694	38.2023	45.6886	0.0424	1.576	0.38	1.196	0.502	0.254	0.7589	0.4197	0.3185	0.506	0.1612	0.212368	0.2124	241.117	380	91.6244	288.376	121.041	61.2437	1576	380	1196	502	254	0.6345
2022	09.22	AS	32	900	42521	368	1523	1155	408	448	629	1057	1276	0.2416	0.758	1.0624	3.139	0.5965	0.7861	0.2139	0.3463	0.7532	36.854	46.5356	0.0409	1.665	0.4023	1.2627	0.5095	0.27	0.7584	0.4035	0.306	0.53	0.1622	0.213855	0.2139	221.021	368	88.9192	279.081	112.599	59.6822	1523	368	1155	466	247	0.6006
2022	09.22	AS	32	900	42732	359	1499	1140	411	457	674	1071	1268	0.2395	0.761	0.8203	3.175	0.6246	0.7974	0.2026	0.4035	0.9211	37.5227	55.3354	0.0417	1.9391	0.4644	1.4747	0.5537	0.299	0.7605	0.3754	0.2855	0.5397	0.1541	0.202603	0.2026	185.137	359	85.978	273.022	102.503	55.3229	1499	359	1140	428	231	0.5157
2021	07.21	SS	1	700	51002	393	2014	1621	436	476	649	1035	1645	0.1951	0.805	3.1739	4.125	0.3961	0.7724	0.2276	0.2468	0.5264	31.5025	41.8725	0.045	1.6514	0.3223	1.3292	0.8028	0.303	0.8049	0.6039	0.4861	0.3769	0.1832	0.22761	0.77239	237.98	393	76.6877	316.312	191.036	72.0045	2014	393	1621	979	369	0.6055
2021	07.21	SS	1	400	43726	341	1697	1356	370	397	519	844	1323	0.2009	0.799	3.8067	3.977	0.3709	0.7242	0.2758	0.1991	0.4376	32.2854	38.0836	0.0807	1.4762	0.2966	1.1796	0.742	0.325	0.7991	0.6291	0.5027	0.4385	0.2204	0.27586	0.72414	230.999	341	68.5215	272.478	171.404	75.1526	1697	341	1356	853	374	0.6774
2021	07.21	SS	1	700	54157	366	1740	1374	396	422	547	893	1366	0.2103	0.79	3.4681	3.754	0.3836	0.7278	0.2722	0.1892	0.4391	39.4548	45.1697	0.0564	1.4498	0.305	1.1448	0.7057	0.312	0.7897	0.6164	0.4868	0.4416	0.2149	0.272202	0.727798	252.449	366	76.9862	289.014	178.162	78.669	1740	366	1374	847	374	0.6897
2021	07.21	SS	1	500	36929	337	1507	1170	366	394	520	861	1260	0.2236	0.776	2.3788	3.472	0.4479	0.7889	0.2111	0.2393	0.5214	31.6026	36.7892	0.0632	1.4994	0.3353	1.1641	0.6428	0.246	0.7764	0.5521	0.4287	0.3824	0.1639	0.211123	0.788877	224.757	337	75.361	261.639	144.46	55.2349	1507	337	1170	646	247	0.6669
2021	07.21	SS	1	700	34516	409	1465	1056	438	464	580	882	1152	0.2792	0.721	1.5863	2.582	0.4479	0.7036	0.2964	0.2462	0.5398	32.7246	39.4355	0.0467	1.6718	0.4667	1.2051	0.6653	0.357	0.7208	0.5521	0.398	0.5369	0.2137	0.296422	0.703578	244.646	409	114.185	294.815	162.762	87.3836	1465	409	1056	583	313	0.5982
2021	07.21	SS	1	600	49256	401	1840	1439	438	471	624	1012	1519	0.2179	0.782	2.6051	3.589	0.4246	0.7769	0.2231	0.2293	0.5166	34.2688	41.6909	0.0571	1.5556	0.339	1.2166	0.7	0.271	0.7821	0.5754	0.45	0.3877	0.1745	0.223083	0.776917	257.778	401	87.3918	313.608	180.45	69.9571	1840	401	1439	828	321	0.6428
2021	07.21	SS	1	400	39774	439	1667	1228	473	499	624	964	1370	0.2633	0.737	1.9576	2.797	0.4275	0.7581	0.2419	0.2117	0.5022	32.4283	38.0904	0.0811	1.5945	0.4199	1.1746	0.6724	0.284	0.7367	0.5725	0.4217	0.4225	0.1782	0.241881	0.758119	275.321	439	115.609	323.39	185.133	78.2142	1667	439	1228	703	297	0.6272
2021	07.21	SS	1	600	45831	481	1571	1090	505	527	615	867	1231	0.3062	0.694	2.0651	2.266	0.3541	0.6881	0.3119	0.2018	0.4098	42.0864	48.7011	0.0701	1.6678	0.5106	1.1572	0.7474	0.361	0.6938	0.6459	0.4481	0.483	0.2164	0.31197	0.68803	288.404	481	147.27	333.73	215.547	104.099	1571	481	1090	704	340	0.5996
2021	07.21	SS	1	700	46641	434	1900	1466	471	504	659	1020	1563	0.2284	0.772	2.5484	3.378	0.3997	0.7701	0.2299	0.2251	0.5116	31.8547	40.7696	0.0455	1.6588	0.3789	1.2799	0.7683	0.294	0.7716	0.6003	0.4632	0.383	0.1774	0.229915	0.770085	261.635	434	99.1347	334.865	201.011	76.9779	1900	434	1466	880	337	0.6029
2021	07.21	SS	2	500	45666	390	1811	1421	432	471	645	1004	1470	0.2154	0.785	2.2619	3.644	0.4321	0.76	0.24	0.2745	0.5982	32.1758	44.5431	0.0644	1.7643	0.3799	1.3844	0.7862	0.332	0.7846	0.5679	0.4456	0.4226	0.1883	0.239995	0.760005	221.051	390	83.9867	306.013	173.788	73.4346	1811	390	1421	807	341	0.5668
2021	07.21	SS	2	700	39635	396	1608	1212	437	476	640	958	1315	0.2463	0.754	1.5363	3.061	0.4637	0.7583	0.2417	0.3218	0.6711	32.7412	47.3835	0.0468	1.9201	0.4729	1.4472	0.7761	0.35	0.7537	0.5363	0.4042	0.4508	0.1822	0.241764	0.758236	206.239	396	97.5224	298.478	160.075	72.1567	1608	396	1212	650	293	0.5208
2021	07.21	SS	2	400	35673	335	1451	1116	369	401	537	830	1161	0.2309	0.769	1.9692	3.331	0.4435	0.7401	0.2599	0.2867	0.6033	32.0045	43.5347	0.08	1.7686	0.4083	1.3603	0.7569	0.353	0.7691	0.5565	0.428	0.467	0.1999	0.259885	0.740115	189.415	335	77.3432	257.657	143.374	66.9538	1451	335	1116	621	290	0.5654
2021	07.21	SS	2	400	36940	363	1857	1494	405	444	619	989	1590	0.1955	0.805	2.8067	4.116	0.419	0.8213	0.1787	0.261	0.5712	24.765	33.7585	0.0619	1.6944	0.3312	1.3632	0.792	0.244	0.8045	0.581	0.4674	0.3076	0.1438	0.178716	0.821284	214.235	363	70.958	292.042	169.674	52.1922	1857	363	1494	868	267	0.5902
2021	07.21	SS	2	500	30210	408	1460	1052	461	507	707	1012	1240	0.2795	0.721	0.6959	2.578	0.5741	0.7909	0.2091	0.4373	0.9474	28.7555	47.4498	0.0575	2.2901	0.64	1.6501	0.7027	0.345	0.7205	0.4259	0.3068	0.4911	0.1507	0.209159	0.790841	178.158	408	114.016	293.984	125.195	61.4795	1460	408	1052	448	220	0.4367
2021	07.21	SS	2	500	43419	415	1587	1172	445	476	596	868	1229	0.2615	0.739	2.0712	2.824	0.3865	0.6945	0.3055	0.2645	0.5148	37.0863	49.3938	0.0742	1.8035	0.4716	1.3319	0.8171	0.407	0.7385	0.6135	0.4531	0.4979	0.2256	0.305462	0.694538	230.108	415	108.522	306.478	188.018	93.6169	1587	415	1172	719	358	0.5545
2021	07.21	SS	2	600	42684	386	1517	1131	419	448	579	902	1215	0.2544	0.746	1.7402	2.93	0.4562	0.733	0.267	0.2564	0.5688	37.7796	47.1025	0.063	1.6723	0.4255	1.2468	0.678	0.333	0.7456	0.5438	0.4054	0.4911	0.1991	0.26706	0.73294	230.82	386	98.2175	287.783	156.487	76.8438	1517	386	1131	615	302	0.598
2021	07.21	SS	2	600	34466	453	1405	952	488	524	661	928	1151	0.3224	0.678	0.8164	2.102	0.4989	0.7332	0.2668	0.3782	0.7283	36.2428	52.9018	0.0604	2.1542	0.6946	1.4596	0.7314	0.389	0.6776	0.5011	0.3395	0.5325	0.1808	0.266836	0.733164	210.287	453	146.056	306.944	153.794	81.8947	1405	453	952	477	254	0.4642
2021	07.21	SS	2	500	24788	322	1163	841	358	391	533	796	943	0.2769	0.723	0.8213	2.612	0.5636	0.7384	0.2616	0.3924	0.8363	29.5129	43.792	0.059	2.0519	0.5681	1.4838	0.6475	0.388	0.7231	0.4364	0.3156	0.5995	0.1892	0.261622	0.738378	156.928	322	89.1522	232.848	101.611	60.9114	1163	322	841	367	220	0.4873
2021	07.21	SS	3	500	44633	389	2265	1876	456	516	775	1169	1954	0.1717	0.828	2.8354	4.823	0.4158	0.8342	0.1658	0.3198	0.6859	23.8305	39.3101	0.0477	1.9916	0.342	1.6496	0.9637	0.273	0.8283	0.5842	0.4839	0.2838	0.1373	0.165796	0.834204	195.32	389	66.8084	322.192	188.231	53.4124	2265	389	1876	1096	311	0.5021
2021	07.21	SS	3	500	51347	395	2466	2071	444	484	691	1162	2096	0.1602	0.84	4.8495	5.243	0.3704	0.8213	0.1787	0.1931	0.4764	24.8326	31.9446	0.0497	1.5318	0.2454	1.2864	0.81	0.23	0.8398	0.6296	0.5288	0.2837	0.15	0.178618	0.821382	257.867	395	63.2705	331.729	208.873	59.266	2466	395	2071	1304	370	0.6528
2021	07.21	SS	3	600	54556	385	2103	1718	427	464	639	1027	1695	0.1831	0.817	3.8607	4.462	0.3737	0.7625	0.2375	0.2154	0.4928	31.7951	41.9312	0.053	1.6143	0.2955	1.3188	0.826	0.313	0.8169	0.6263	0.5117	0.3792	0.194	0.237493	0.762507	238.493	385	70.4826	314.517	196.985	74.6933	2103	385	1718	1076	408	0.6195
2021	07.21	SS	3	600	49528	349	1859	1510	375	400	510	850	1507	0.1877	0.812	5.5062	4.327	0.3318	0.7669	0.2331	0.1656	0.3554	32.8398	35.1776	0.0547	1.3188	0.2476	1.0712	0.7158	0.25	0.8123	0.6682	0.5428	0.3489	0.1893	0.233135	0.766865	264.635	349	65.5196	283.48	189.425	66.0828	1859	349	1510	1009	352	0.7583
2021	07.21	SS	3	700	58470	366	1858	1492	393	418	537	875	1458	0.197	0.803	4.7044	4.077	0.3412	0.7319	0.2681	0.1676	0.382	39.2285	43.9297	0.056	1.3945	0.2747	1.1198	0.7378	0.3	0.803	0.6588	0.5291	0.4069	0.2153	0.268066	0.731934	262.46	366	72.0969	293.903	193.637	78.7944	1858	366	1492	983	400	0.7171
2021	07.21	SS	3	600	48055	399	2035	1636	447	492	688	1072	1710	0.1961	0.804	2.746	4.1	0.4114	0.8013	0.1987	0.2751	0.5888	29.4127	42.1014	0.049	1.7805	0.3491	1.4314	0.8426	0.284	0.8039	0.5886	0.4732	0.3375	0.1597	0.198653	0.801347	224.094	399	78.2314	320.769	188.814	63.7224	2035	399	1636	963	325	0.5616
2021	07.21	SS	3	700	49252	495	1809	1314	520	544	647	963	1450	0.2736	0.726	2.683	2.655	0.3562	0.7268	0.2732	0.1826	0.3856	37.5218	40.6219	0.0536	1.4905	0.4078	1.0826	0.697	0.296	0.7264	0.6438	0.4677	0.4243	0.1985	0.273164	0.726836	332.103	495	135.448	359.552	231.493	98.2338	1809	495	1314	846	359	0.6709
2021	07.21	SS	3	600	43872	421	1711	1290	454	487	623	926	1355	0.2461	0.754	2.2444	3.064	0.3915	0.724	0.276	0.2558	0.522	34.0488	45.3984	0.0567	1.7685	0.4351	1.3333	0.8114	0.368	0.7539	0.6085	0.4588	0.4535	0.2081	0.275955	0.724045	238.055	421	103.589	317.411	193.153	87.5956	1711	421	1290	785	356	0.5655
2021	07.21	SS	3	600	30786	452	1458	1006	487	518	653	934	1181	0.31	0.69	1.0009	2.226	0.4791	0.7247	0.2753	0.3082	0.666	30.6412	42.5926	0.0511	2.0146	0.6246	1.39	0.724	0.383	0.69	0.5209	0.3594	0.5286	0.19	0.275348	0.724652	224.362	452	140.126	311.874	162.447	85.8738	1458	452	1006	524	277	0.4964
2021	07.21	SS	4	500	49855	378	2273	1895	422	460	640	1069	1903	0.1663	0.834	4.8017	5.013	0.3646	0.8047	0.1953	0.2005	0.4609	26.3478	33.3002	0.0527	1.516	0.2521	1.2639	0.803	0.247	0.8337	0.6354	0.5297	0.3073	0.1628	0.195258	0.804742	249.34	378	62.8614	315.139	200.225	61.531	2273	378	1895	1204	370	0.6596
2021	07.21	SS	4	500	44887	373	2043	1670	417	458	644	1023	1691	0.1826	0.817	3.4437	4.477	0.3892	0.7892	0.2108	0.2455	0.5409	26.9177	37.4087	0.0538	1.7001	0.3104	1.3897	0.8488	0.293	0.8174	0.6108	0.4993	0.3451	0.1723	0.210787	0.789213	219.399	373	68.1003	304.9	186.226	64.2663	2043	373	1670	1020	352	0.5882
2021	07.21	SS	4	600	38503	376	1962	1586	423	465	648	1023	1646	0.1916	0.808	2.9428	4.218	0.4079	0.8008	0.1992	0.2648	0.5717	24.3162	34.0752	0.0405	1.7336	0.3322	1.4013	0.8297	0.279	0.8084	0.5921	0.4786	0.3365	0.1611	0.199242	0.800758	216.89	376	72.0571	303.943	179.951	60.5586	1962	376	1586	939	316	0.5768
2021	07.21	SS	4	600	51796	392	1880	1488	426	462	611	954	1513	0.2085	0.791	3.1759	3.796	0.3777	0.7534	0.2466	0.2419	0.4906	34.8482	45.2655	0.0581	1.6411	0.3422	1.2989	0.8083	0.32	0.7915	0.6223	0.4926	0.3963	0.1952	0.246617	0.753383	238.864	392	81.7362	310.264	193.081	76.5234	1880	392	1488	926	367	0.6093
2021	07.21	SS	4	500	44967	358	1938	1580	398	435	600	957	1598	0.1847	0.815	3.6465	4.413	0.3791	0.7848	0.2152	0.2342	0.5105	28.4994	38.3799	0.057	1.6518	0.3051	1.3467	0.8361	0.29	0.8153	0.6209	0.5062	0.3466	0.1754	0.215204	0.784796	216.733	358	66.1321	291.868	181.217	62.807	1938	358	1580	981	340	0.6054
2021	07.21	SS	4	600	56408	392	1941	1549	421	448	575	918	1557	0.202	0.798	4.4071	3.952	0.3396	0.7521	0.2479	0.1743	0.3938	36.4553	42.277	0.0608	1.4532	0.2935	1.1597	0.7659	0.287	0.798	0.6604	0.527	0.3754	0.1978	0.247914	0.752086	269.75	392	79.1674	312.833	206.603	77.5518	1941	392	1549	1023	384	0.6881
2021	07.21	SS	4	600	56313	390	1898	1508	424	453	588	932	1492	0.2055	0.795	3.7471	3.867	0.3594	0.7308	0.2692	0.1923	0.4377	37.3822	45.5208	0.0623	1.5326	0.3149	1.2177	0.78	0.328	0.7945	0.6406	0.509	0.4203	0.2139	0.269244	0.730756	254.47	390	80.137	309.863	198.493	83.4247	1898	390	1508	966	406	0.6525
2021	07.21	SS	4	500	40851	377	1610	1233	412	443	586	924	1273	0.2342	0.766	2.0553	3.271	0.4436	0.7267	0.2733	0.2514	0.565	33.1708	42.2468	0.0663	1.663	0.3894	1.2736	0.7086	0.348	0.7658	0.5564	0.4261	0.4913	0.2093	0.273359	0.726641	226.699	377	88.2789	288.721	160.635	78.9124	1610	377	1233	686	337	0.6013
2021	07.21	SS	4	400	33638	550	1622	1072	581	609	728	993	1257	0.3391	0.661	1.138	1.949	0.4132	0.6595	0.3405	0.2612	0.5535	31.4175	42.0792	0.0785	2.0265	0.6872	1.3394	0.7859	0.456	0.6609	0.5868	0.3878	0.5803	0.225	0.34052	0.65948	271.404	550	186.498	363.502	213.286	123.767	1622	550	1072	629	365	0.4935
2021	07.21	SS	5	600	53237	359	1880	1521	393	423	562	927	1502	0.191	0.809	4.0229	4.237	0.3734	0.7515	0.2485	0.1972	0.4449	35.0406	41.7444	0.0584	1.4725	0.2812	1.1913	0.7464	0.296	0.809	0.6266	0.5069	0.3966	0.2011	0.24851	0.75149	243.803	359	68.5537	290.446	181.982	72.1819	1880	359	1521	953	378	0.6791
2021	07.21	SS	5	700	49612	400	1733	1333	435	467	600	943	1388	0.2308	0.769	2.5313	3.333	0.4074	0.7412	0.2588	0.2401	0.5001	37.2575	45.7428	0.0532	1.5962	0.3684	1.2277	0.7276	0.318	0.7692	0.5926	0.4559	0.4367	0.1991	0.258788	0.741212	250.595	400	92.3254	307.675	182.343	79.6307	1733	400	1333	790	345	0.6265
2021	07.21	SS	5	600	46078	365	1603	1238	392	425	552	890	1282	0.2277	0.772	2.4969	3.392	0.4241	0.7407	0.2593	0.2666	0.5035	37.2592	44.2379	0.0621	1.5374	0.3501	1.1873	0.6838	0.308	0.7723	0.5759	0.4448	0.4502	0.2002	0.25927	0.74073	237.414	365	83.1098	281.89	162.349	73.0911	1603	365	1238	713	321	0.6505
2021	07.21	SS	5	500	47651	376	1864	1488	409	440	574	905	1485	0.2017	0.798	3.8253	3.957	0.3555	0.7453	0.2547	0.2083	0.4435	32.0628	40.0028	0.0641	1.5629	0.3153	1.2476	0.8041	0.318	0.7983	0.6445	0.5145	0.3952	0.2033	0.254706	0.745294	240.578	376	75.8455	300.154	193.446	76.4506	1864	376	1488	959	379	0.6398
2021	07.21	SS	5	700	52227	380	1819	1439	424	463	629	1000	1490	0.2089	0.791	2.4634	3.787	0.4309	0.7714	0.2286	0.271	0.5768	36.3334	48.6399	0.0519	1.6922	0.3535	1.3387	0.7619	0.306	0.7911	0.5691	0.4502	0.4017	0.1809	0.228607	0.771393	224.56	380	79.3843	300.616	171.094	68.7301	1819	380	1439	819	329	0.5909
2021	07.21	SS	5	700	55954	380	1679	1299	411	435	566	926	1321	0.2263	0.774	2.6767	3.418	0.4203	0.7244	0.2756	0.1848	0.4773	43.1142	48.9576	0.0616	1.4677	0.3322	1.1355	0.6582	0.313	0.7737	0.5797	0.4485	0.4754	0.2132	0.275589	0.724411	258.908	380	86.0036	293.996	170.423	81.0244	1679	380	1299	753	358	0.6813
2021	07.21	SS	5	700	48700	372	1714	1342	406	439	587	944	1382	0.217	0.783	2.529	3.608	0.4262	0.7526	0.2474	0.2459	0.534	36.3281	45.516	0.0519	1.6002	0.3473	1.2529	0.7189	0.31	0.783	0.5738	0.4492	0.4312	0.1937	0.247423	0.752577	232.471	372	80.7375	291.262	167.118	72.056	1714	372	1342	770	332	0.6249
2021	07.21	SS	5	500	43284	338	1706	1368	376	409	561	924	1387	0.1981	0.802	2.8452	4.047	0.4284	0.7668	0.2332	0.2412	0.5434	31.6797	40.1853	0.0634	1.5819	0.3134	1.2685	0.7251	0.296	0.8019	0.5716	0.4584	0.4079	0.187	0.233156	0.766844	213.667	338	66.966	271.034	154.933	63.2016	1706	338	1368	782	319	0.6322
2021	07.21	SS	5	625	49592.9	371.25	1749.75	1378.5	405.75	437.625	578.875	932.375	1404.62	0.212688	0.78725	2.92384	3.72237	0.408275	0.749238	0.250762	0.231888	0.502938	36.1344	44.3783	0.058325	1.56387	0.332675	1.23119	0.72825	0.308125	0.787313	0.591725	0.46605	0.424363	0.197313	0.251106	0.748894	237.391	371.25	79.1157	292.134	172.961	73.2958	1749.75	371.25	1378.5	817.375	345.125	0.64065
2021	07.21	SS	6	400	47673	389	2219	1830	436	477	667	1093	1869	0.1753	0.825	3.9285	4.704	0.3847	0.8087	0.1913	0.224	0.5064	26.0903	34.3423	0.0652	1.5961	0.2798	1.3163	0.8099	0.252	0.8247	0.6153	0.5074	0.3108	0.1577	0.191235	0.808765	243.719	389	68.1933	320.807	197.393	61.3565	2219	389	1830	1126	350	0.6265
2021	07.21	SS	6	700	46164	340	1618	1278	380	412	579	919	1301	0.2101	0.79	2.1708	3.759	0.4531	0.752	0.248	0.2504	0.6234	36.1611	49.7554	0.0517	1.742	0.3661	1.3759	0.7526	0.341	0.7899	0.5469	0.432	0.4535	0.1959	0.248019	0.751981	195.178	340	71.4462	268.554	146.885	66.6131	1618	340	1278	699	317	0.5741
2021	07.21	SS	6	600	52693	387	1890	1503	428	464	620	981	1533	0.2048	0.795	3.0123	3.884	0.3952	0.7625	0.2375	0.2395	0.5167	35.0979	45.8912	0.0585	1.6442	0.3367	1.3075	0.7908	0.311	0.7952	0.6048	0.481	0.3927	0.1889	0.237505	0.762495	235.373	387	79.2429	307.757	186.129	73.1	1890	387	1503	909	357	0.6082
2021	07.21	SS	6	700	53938	463	2013	1550	502	537	698	1054	1657	0.23	0.77	2.6298	3.348	0.3813	0.7703	0.2297	0.2258	0.5054	34.838	46.1755	0.0498	1.7214	0.3959	1.3254	0.8201	0.304	0.77	0.6187	0.4764	0.3712	0.1769	0.229661	0.770339	268.967	463	106.492	356.508	220.575	81.8818	2013	463	1550	959	356	0.5809
2021	07.21	SS	6	800	61020	446	1964	1518	489	528	689	1061	1558	0.2271	0.773	2.4439	3.404	0.4051	0.7325	0.2675	0.2569	0.5336	40.2369	52.995	0.0503	1.704	0.387	1.3171	0.7835	0.352	0.7729	0.5949	0.4598	0.4496	0.2067	0.267467	0.732533	261.737	446	101.281	344.719	205.06	92.1976	1964	446	1518	903	406	0.5868
2021	07.21	SS	6	280	33019	501	1460	959	532	564	685	906	1126	0.3432	0.657	0.9464	1.914	0.4223	0.6517	0.3483	0.3337	0.6396	34.4701	52.2016	0.1231	2.3056	0.7912	1.5144	0.8748	0.527	0.6568	0.5777	0.3795	0.6029	0.2288	0.348295	0.651705	217.297	501	171.918	329.082	190.106	114.612	1460	501	959	554	334	0.4337
2021	07.21	SS	6	600	29160	616	1567	951	648	674	801	1069	1278	0.3931	0.607	0.6305	1.544	0.4763	0.6961	0.3039	0.2734	0.6484	30.7012	41.7933	0.0512	2.2431	0.8818	1.3613	0.7129	0.414	0.6069	0.5237	0.3178	0.5803	0.1844	0.303903	0.696097	274.62	616	242.154	373.846	195.768	113.608	1567	616	951	498	289	0.4458
2021	07.21	SS	6	600	39152	442	1552	1110	474	503	617	848	1217	0.2848	0.715	1.8064	2.511	0.3658	0.6982	0.3018	0.2613	0.5255	35.3114	50.7348	0.0589	2.0089	0.5721	1.4368	0.9113	0.434	0.7152	0.6342	0.4536	0.4759	0.2159	0.301816	0.698184	220.021	442	125.879	316.121	200.495	95.4059	1552	442	1110	704	335	0.4978
2021	07.21	SS	6	900	64461	444	1702	1258	478	507	642	977	1338	0.2609	0.739	1.917	2.833	0.4237	0.7107	0.2893	0.2305	0.5246	51.2799	63.4986	0.057	1.6753	0.437	1.2383	0.7136	0.358	0.7391	0.5763	0.426	0.5021	0.2139	0.28936	0.71064	265.027	444	115.826	328.174	189.13	94.9565	1702	444	1258	725	364	0.5969
2021	07.21	SS	7	600	50205	372	2239	1867	411	448	613	1027	1855	0.1661	0.834	5.2616	5.019	0.3508	0.7943	0.2057	0.1982	0.4303	26.93	33.0286	0.0449	1.4708	0.2444	1.2265	0.7962	0.252	0.8339	0.6492	0.5413	0.3168	0.1715	0.205667	0.794333	252.924	372	61.8062	310.194	201.369	63.7999	2239	372	1867	1212	384	0.6799
2021	07.21	SS	7	400	48097	379	2261	1882	426	470	669	1096	1902	0.1676	0.832	4.1511	4.966	0.381	0.8092	0.1908	0.2338	0.5136	25.5954	34.5079	0.064	1.6197	0.2715	1.3482	0.8346	0.257	0.8324	0.619	0.5153	0.3082	0.1588	0.190776	0.809224	233.994	379	63.5299	315.47	195.283	60.1774	2261	379	1882	1165	359	0.6174
2021	07.21	SS	7	500	51975	387	2274	1887	438	482	682	1112	1891	0.1702	0.83	3.9844	4.876	0.3842	0.797	0.203	0.2332	0.5211	27.5827	37.4111	0.0552	1.6345	0.2782	1.3563	0.8352	0.275	0.8298	0.6158	0.511	0.3296	0.1684	0.202968	0.797032	236.77	387	65.8615	321.139	197.755	65.1807	2274	387	1887	1162	383	0.6118
2021	07.21	SS	7	700	60635	368	1993	1625	400	429	556	923	1576	0.1846	0.815	5.1229	4.416	0.3415	0.7434	0.2566	0.1785	0.3856	37.353	42.1764	0.0534	1.3848	0.2557	1.1291	0.7435	0.29	0.8154	0.6585	0.5369	0.3897	0.2092	0.256617	0.743383	265.742	368	67.9498	300.05	197.571	76.9975	1993	368	1625	1070	417	0.7221
2021	07.21	SS	7	600	53860	439	1997	1558	478	518	655	946	1652	0.2198	0.78	3.3681	3.549	0.3254	0.7786	0.2214	0.2567	0.4621	34.6092	49.1492	0.0577	1.8203	0.4001	1.4201	0.958	0.314	0.7802	0.6746	0.5263	0.3283	0.1728	0.221471	0.778529	241.169	439	96.5053	342.495	231.041	75.8413	1997	439	1558	1051	345	0.5494
2021	07.21	SS	7	600	56746	393	2006	1613	432	468	631	1018	1622	0.1959	0.804	3.425	4.104	0.3875	0.7619	0.2381	0.2232	0.4918	35.2197	44.7055	0.0587	1.5786	0.3093	1.2693	0.7775	0.302	0.8041	0.6125	0.4925	0.3887	0.1914	0.238079	0.761921	248.955	393	76.9935	316.007	193.561	75.2303	2006	393	1613	988	384	0.6335
2021	07.21	SS	7	600	52889	382	1943	1561	417	449	598	971	1577	0.1966	0.803	3.6934	4.086	0.3773	0.7655	0.2345	0.205	0.4612	33.9207	41.465	0.0565	1.5216	0.2991	1.2224	0.7612	0.287	0.8034	0.6227	0.5003	0.3765	0.1884	0.234447	0.765553	251.052	382	75.1024	306.898	191.098	71.9568	1943	382	1561	972	366	0.6572
2021	07.21	SS	7	700	54687	392	1826	1434	426	455	594	966	1457	0.2147	0.785	3.0577	3.658	0.4003	0.7427	0.2573	0.2022	0.4695	38.1755	44.7819	0.0545	1.4937	0.3207	1.1731	0.7035	0.302	0.7853	0.5997	0.471	0.4291	0.2021	0.257331	0.742669	262.436	392	84.1533	307.847	184.622	79.2158	1826	392	1434	860	369	0.6695
2021	07.21	SS	7	600	55403	358	2060	1702	395	427	577	962	1678	0.1738	0.826	4.9234	4.754	0.3549	0.7756	0.2244	0.188	0.4289	32.5913	39.3902	0.0543	1.4628	0.2542	1.2086	0.7797	0.271	0.8262	0.6451	0.533	0.3479	0.1854	0.22443	0.77557	244.736	358	62.2155	295.784	190.817	66.3864	2060	358	1702	1098	382	0.6836
2021	07.21	SS	8	600	49728	360	2112	1752	402	441	619	1043	1762	0.1705	0.83	4.1657	4.867	0.3898	0.8002	0.1998	0.2226	0.4928	28.4229	35.9274	0.0474	1.5238	0.2597	1.264	0.7713	0.253	0.8295	0.6102	0.5062	0.3274	0.1657	0.199779	0.800221	236.251	360	61.3636	298.636	182.216	59.6591	2112	360	1752	1069	350	0.6563
2021	07.21	SS	8	290	39182	323	2023	1700	365	402	576	995	1717	0.1597	0.84	4.4927	5.263	0.3953	0.82	0.18	0.2176	0.4961	23.0877	28.9742	0.0796	1.4934	0.2384	1.255	0.7589	0.226	0.8403	0.6047	0.5082	0.2977	0.1513	0.180019	0.819981	216.285	323	51.5714	271.429	164.135	48.8571	2023	323	1700	1028	306	0.6696
2021	07.21	SS	8	400	52014	355	2216	1861	395	430	600	1027	1846	0.1602	0.84	5.3413	5.242	0.3611	0.8012	0.1988	0.1881	0.4388	27.9889	34.0143	0.07	1.4471	0.2318	1.2153	0.7764	0.242	0.8398	0.6389	0.5366	0.3112	0.167	0.198826	0.801174	245.318	355	56.8705	298.13	190.476	59.2735	2216	355	1861	1189	370	0.691
2021	07.21	SS	8	600	57833	352	2125	1773	385	415	557	958	1739	0.1656	0.834	5.981	5.037	0.3418	0.7823	0.2177	0.1692	0.3854	32.6581	36.8257	0.0544	1.3515	0.2239	1.1276	0.7422	0.245	0.8344	0.6582	0.5492	0.3308	0.1816	0.217733	0.782267	260.451	352	58.3078	293.692	193.31	63.9398	2125	352	1773	1167	386	0.7399
2021	07.21	SS	8	600	55987	344	2006	1662	376	405	538	914	1610	0.1715	0.829	5.6329	4.831	0.343	0.7617	0.2383	0.1745	0.3891	33.726	38.2623	0.0562	1.3693	0.2348	1.1345	0.7454	0.27	0.8285	0.657	0.5444	0.3626	0.1974	0.238228	0.761772	251.223	344	58.991	285.009	187.262	67.9083	2006	344	1662	1092	396	0.7303
2021	07.21	SS	8	500	48913	363	2203	1840	404	442	618	1041	1864	0.1648	0.835	4.823	5.069	0.3685	0.8158	0.1842	0.2065	0.462	26.6226	33.3764	0.0532	1.501	0.2473	1.2537	0.7917	0.231	0.8352	0.6315	0.5275	0.2917	0.1539	0.184209	0.815791	241.839	363	59.8134	303.187	191.469	55.8588	2203	363	1840	1162	339	0.6662
2021	07.21	SS	8	600	54214	398	2031	1633	436	469	635	1028	1651	0.196	0.804	3.4904	4.103	0.3858	0.7673	0.2327	0.2021	0.4838	33.2385	41.68	0.0554	1.5596	0.3056	1.254	0.7702	0.292	0.804	0.6142	0.4938	0.3789	0.1871	0.23272	0.76728	255.194	398	77.9931	320.007	196.55	74.4658	2031	398	1633	1003	380	0.6412
2021	07.21	SS	8	600	51330	366	1987	1621	403	436	586	973	1595	0.1842	0.816	4.1633	4.429	0.3745	0.7582	0.2418	0.2036	0.4524	31.7049	38.3036	0.0528	1.4809	0.2728	1.2081	0.7557	0.292	0.8158	0.6255	0.5103	0.3866	0.1973	0.241818	0.758182	247.147	366	67.4162	298.584	186.776	72.2053	1987	366	1621	1014	392	0.6753
2021	07.21	SS	8	600	52368	397	2132	1735	435	470	631	1041	1770	0.1862	0.814	4.1454	4.37	0.3712	0.7914	0.2086	0.2017	0.4496	30.2228	36.6052	0.0504	1.4883	0.2771	1.2112	0.7616	0.253	0.8138	0.6288	0.5117	0.3318	0.1698	0.208636	0.791364	266.747	397	73.9254	323.075	203.155	67.4081	2132	397	1735	1091	362	0.6719
2021	07.21	C	9	700	51202	400	1710	1310	437	467	613	976	1369	0.2339	0.766	2.1614	3.275	0.4397	0.7397	0.2603	0.229	0.542	39.1244	48.2262	0.0559	1.609	0.3764	1.2326	0.6907	0.321	0.7661	0.5603	0.4292	0.4646	0.1994	0.260315	0.739685	248.602	400	93.5673	306.433	171.696	79.7661	1710	400	1310	734	341	0.6215
2021	07.21	C	9	700	56804	343	1971	1628	381	410	560	945	1607	0.174	0.826	4.634	4.746	0.3698	0.7764	0.2236	0.1781	0.4443	34.9312	41.9716	0.0499	1.4547	0.2532	1.2016	0.7572	0.269	0.826	0.6302	0.5205	0.3548	0.1847	0.223595	0.776405	235.787	343	59.69	283.31	178.548	63.3445	1971	343	1628	1026	364	0.6874
2021	07.21	C	9	600	52149	372	2003	1631	412	451	614	1005	1655	0.1857	0.814	3.6808	4.384	0.3881	0.7866	0.2134	0.2391	0.4946	32.0129	40.7958	0.0534	1.565	0.2907	1.2744	0.7798	0.272	0.8143	0.6119	0.4983	0.3487	0.1737	0.21337	0.78663	237.7	372	69.0884	302.912	185.35	64.6311	2003	372	1631	998	348	0.639
2021	07.21	C	9	400	41428	525	1658	1133	552	576	681	943	1306	0.3166	0.683	1.6898	2.158	0.3689	0.6893	0.3107	0.2118	0.459	36.6042	45.5364	0.0915	1.8205	0.5764	1.244	0.7851	0.386	0.6834	0.6311	0.4312	0.4923	0.2123	0.310691	0.689309	288.382	525	166.239	358.761	226.402	111.46	1658	525	1133	715	352	0.5493
2021	07.21	C	9	700	44878	364	1404	1040	391	415	531	866	1125	0.2593	0.741	1.7045	2.857	0.4827	0.7317	0.2683	0.2308	0.5353	43.191	47.8944	0.0617	1.497	0.3881	1.1089	0.5736	0.297	0.7407	0.5173	0.3832	0.5186	0.1987	0.268272	0.731728	243.153	364	94.3704	269.63	139.482	72.3333	1404	364	1040	538	279	0.668
2021	07.21	C	9	500	43694	545	1668	1123	569	589	670	923	1281	0.3267	0.673	2.0671	2.061	0.3366	0.6554	0.3446	0.1781	0.371	38.9481	42.9322	0.0779	1.6372	0.535	1.1023	0.7313	0.38	0.6733	0.6634	0.4466	0.5195	0.232	0.344636	0.655364	332.885	545	178.072	366.928	243.42	126.448	1668	545	1123	745	387	0.6108
2021	07.21	C	9	600	40256	435	1495	1060	464	489	604	902	1171	0.291	0.709	1.5156	2.437	0.4406	0.6943	0.3057	0.2358	0.5314	38.017	45.8592	0.0634	1.7013	0.495	1.2063	0.6748	0.369	0.709	0.5594	0.3967	0.5464	0.2167	0.305656	0.694344	255.687	435	126.572	308.428	172.545	94.2742	1495	435	1060	593	324	0.5878
2021	07.21	C	9	700	35003	422	1414	992	450	475	583	883	1138	0.2984	0.702	1.3598	2.351	0.4647	0.7218	0.2782	0.252	0.541	35.3241	41.1221	0.0505	1.6594	0.4952	1.1641	0.6231	0.324	0.7016	0.5353	0.3755	0.5198	0.1952	0.278249	0.721751	254.309	422	125.943	296.057	158.474	82.3706	1414	422	992	531	276	0.6026
2021	07.21	C	9	600	48222	686	1925	1239	710	734	832	1101	1538	0.3564	0.644	1.6402	1.806	0.3349	0.6877	0.3123	0.1937	0.3928	38.9598	45.6878	0.0649	1.822	0.6493	1.1727	0.7799	0.366	0.6436	0.6651	0.4281	0.4697	0.201	0.312397	0.687603	376.509	686	244.465	441.534	293.644	137.913	1925	686	1239	824	387	0.5489
2021	07.21	C	10	600	58510	390	2238	1848	424	456	604	1032	1848	0.1743	0.826	5.5126	4.738	0.3474	0.789	0.211	0.1732	0.386	31.7007	35.223	0.0528	1.3456	0.2345	1.1111	0.7251	0.234	0.8257	0.6526	0.5389	0.3234	0.1743	0.211051	0.788949	289.834	390	67.9625	322.038	210.161	67.9625	2238	390	1848	1206	390	0.7432
2021	07.21	C	10	700	56099	386	1991	1605	426	462	629	1022	1625	0.1939	0.806	3.3416	4.158	0.3963	0.772	0.228	0.2243	0.5047	34.9921	44.5654	0.05	1.5799	0.3063	1.2736	0.7689	0.29	0.8061	0.6037	0.4867	0.3777	0.1838	0.228017	0.771983	244.319	386	74.8348	311.165	187.862	70.9573	1991	386	1605	969	366	0.633
2021	07.21	C	10	300	29159	868	2352	1484	901	928	1061	1428	2152	0.369	0.631	1.2911	1.71	0.3774	0.8652	0.1348	0.1819	0.4335	19.6883	22.6181	0.0656	1.8208	0.6719	1.1488	0.7153	0.155	0.631	0.6226	0.3929	0.2165	0.085	0.134793	0.865207	476.714	868	320.333	547.667	341	73.8095	2352	868	1484	924	200	0.5492
2021	07.21	C	10	500	44678	474	1678	1204	513	550	689	959	1313	0.2825	0.718	1.5237	2.54	0.4028	0.6968	0.3032	0.3073	0.5952	37.1468	54.8905	0.0743	2.0594	0.5817	1.4777	0.8824	0.448	0.7175	0.5972	0.4285	0.5076	0.2175	0.303139	0.696861	230.164	474	133.895	340.105	203.102	103.105	1678	474	1204	719	365	0.4856
2021	07.21	C	10	500	42170	512	1619	1107	538	564	672	924	1220	0.3162	0.684	1.6054	2.162	0.3722	0.6396	0.3604	0.2349	0.4818	38.1333	49.3635	0.0763	1.8932	0.5987	1.2945	0.8127	0.467	0.6838	0.6278	0.4293	0.5741	0.2464	0.36042	0.63958	270.442	512	161.917	350.083	219.79	126.182	1619	512	1107	695	399	0.5282
2021	07.21	C	10	700	57496	435	1807	1372	468	499	625	927	1446	0.2407	0.759	2.7729	3.154	0.3586	0.7369	0.2631	0.2259	0.4616	41.9461	53.9957	0.0599	1.6954	0.4081	1.2873	0.8256	0.339	0.7593	0.6414	0.487	0.4102	0.1998	0.263102	0.736898	256.577	435	104.718	330.282	211.843	86.9037	1807	435	1372	880	361	0.5898
2021	07.21	C	10	400	40001	412	1469	1057	444	473	594	866	1192	0.2805	0.72	1.529	2.566	0.4295	0.7379	0.2621	0.2744	0.574	37.8827	50.6215	0.0947	1.8571	0.5209	1.3363	0.7623	0.35	0.7195	0.5705	0.4105	0.4594	0.1886	0.262088	0.737912	221.851	412	115.551	296.449	169.119	77.6882	1469	412	1057	603	277	0.5385
2021	07.21	C	10	300	30581	630	1642	1012	664	696	822	1095	1369	0.3837	0.616	0.7051	1.606	0.4595	0.7302	0.2698	0.3162	0.6324	30.2574	41.6446	0.1009	2.2332	0.8568	1.3763	0.7439	0.371	0.6163	0.5405	0.3331	0.4991	0.1663	0.269764	0.730236	282.106	630	241.717	388.283	209.872	104.744	1642	630	1012	547	273	0.4478
2021	07.21	C	10	500	34950	398	1433	1035	422	445	544	825	1105	0.2777	0.722	1.9554	2.601	0.4126	0.6831	0.3169	0.2222	0.4702	33.8075	38.5316	0.0676	1.578	0.4383	1.1397	0.6695	0.361	0.7223	0.5874	0.4243	0.5395	0.2289	0.316902	0.683098	252.218	398	110.54	287.46	168.865	91.0984	1433	398	1035	608	328	0.6337
2021	07.21	C	11	700	58265	353	1857	1504	386	414	547	906	1440	0.1901	0.81	4.2289	4.261	0.3677	0.7227	0.2773	0.1862	0.43	38.7792	45.3476	0.0554	1.4438	0.2745	1.1694	0.7394	0.324	0.8099	0.6323	0.5121	0.4385	0.2246	0.277264	0.722736	244.494	353	67.1023	285.898	180.777	79.2682	1857	353	1504	951	417	0.6926
2021	07.21	C	11	700	43949	405	1677	1272	443	480	633	967	1379	0.2415	0.758	1.8546	3.141	0.4418	0.7657	0.2343	0.2909	0.5975	34.5906	46.7773	0.0494	1.7829	0.4306	1.3523	0.7548	0.317	0.7585	0.5582	0.4234	0.4197	0.1777	0.234277	0.765723	227.158	405	97.8086	307.191	171.467	71.9678	1677	405	1272	710	298	0.5609
2021	07.21	C	11	600	53916	386	2099	1713	425	459	621	1021	1744	0.1839	0.816	4.1534	4.438	0.3707	0.7928	0.2072	0.1985	0.4573	31.5139	38.8755	0.0525	1.5116	0.278	1.2336	0.7763	0.256	0.8161	0.6293	0.5136	0.3293	0.1691	0.207228	0.792772	255.359	386	70.9843	315.016	198.241	65.2835	2099	386	1713	1078	355	0.6616
2021	07.21	C	11	600	56879	360	2052	1692	394	424	563	950	1655	0.1754	0.825	5.2595	4.7	0.3487	0.7654	0.2346	0.1773	0.3999	33.6558	38.5996	0.0561	1.3909	0.244	1.1469	0.747	0.269	0.8246	0.6513	0.537	0.3603	0.1935	0.234663	0.765337	258.825	360	63.1579	296.842	193.333	69.6491	2052	360	1692	1102	397	0.719
2021	07.21	C	11	600	57924	388	2191	1803	429	469	642	1058	1793	0.1771	0.823	4.2644	4.647	0.3716	0.7793	0.2207	0.2219	0.4696	32.1658	40.6473	0.0536	1.5356	0.2719	1.2637	0.7941	0.279	0.8229	0.6284	0.5171	0.3513	0.1817	0.220757	0.779243	252.67	388	68.7102	319.29	200.641	70.4811	2191	388	1803	1133	398	0.6512
2021	07.21	C	11	600	46811	405	1837	1432	451	494	677	1058	1525	0.2205	0.78	1.9735	3.536	0.456	0.7821	0.2179	0.3003	0.6331	32.7286	45.4425	0.0545	1.7812	0.3927	1.3885	0.7553	0.303	0.7795	0.544	0.4241	0.4005	0.1698	0.217872	0.782128	227.375	405	89.2896	315.71	171.745	68.7861	1837	405	1432	779	312	0.5614
2021	07.21	C	11	800	51240	385	1719	1334	418	448	581	931	1353	0.224	0.776	2.7026	3.465	0.4093	0.7256	0.2744	0.2249	0.4898	38.4497	46.0082	0.0481	1.5419	0.3453	1.1966	0.7068	0.328	0.776	0.5907	0.4584	0.4645	0.2129	0.27438	0.72562	249.692	385	86.2275	298.772	176.486	81.9721	1719	385	1334	788	366	0.6485
2021	07.21	C	11	700	49830	366	1676	1310	396	423	541	872	1275	0.2184	0.782	3.2133	3.579	0.3863	0.6939	0.3061	0.2061	0.4453	38.0776	43.8971	0.0544	1.4749	0.3221	1.1528	0.7075	0.353	0.7816	0.6137	0.4797	0.4988	0.2393	0.306114	0.693886	248.152	366	79.926	286.074	175.575	87.5692	1676	366	1310	804	401	0.678
2021	07.21	C	11	600	59914	365	1898	1533	395	422	549	918	1480	0.1923	0.808	4.5169	4.2	0.3607	0.7273	0.2727	0.1761	0.4001	39.1224	43.3907	0.0652	1.3732	0.2641	1.1091	0.709	0.302	0.8077	0.6393	0.5163	0.4265	0.2202	0.272661	0.727339	265.803	365	70.1923	294.808	188.462	80.3846	1898	365	1533	980	418	0.7282
2021	07.21	C	12	600	56595	371	1997	1626	407	440	597	994	1612	0.1858	0.814	3.9593	4.383	0.3831	0.7632	0.2368	0.203	0.4633	34.8455	42.1353	0.0581	1.4851	0.2759	1.2092	0.7459	0.286	0.8142	0.6169	0.5023	0.3838	0.1928	0.236766	0.763234	249.815	371	68.9239	302.076	186.336	71.5248	1997	371	1626	1003	385	0.6734
2021	07.21	C	12	700	54036	414	2079	1665	449	479	613	957	1720	0.1991	0.801	4.54	4.022	0.3261	0.7844	0.2156	0.1802	0.3984	32.4937	39.6946	0.0464	1.5254	0.3038	1.2216	0.8232	0.263	0.8009	0.6739	0.5397	0.32	0.1727	0.215648	0.784352	271.404	414	82.4416	331.558	223.429	71.4892	2079	414	1665	1122	359	0.6556
2021	07.21	C	12	500	55227	392	2224	1832	428	458	608	1013	1827	0.1763	0.824	5.3959	4.673	0.339	0.7833	0.2167	0.1638	0.393	30.1456	34.9514	0.0603	1.4075	0.2481	1.1594	0.7664	0.251	0.8237	0.661	0.5445	0.3278	0.1785	0.216676	0.783324	278.508	392	69.0935	322.906	213.45	69.9748	2224	392	1832	1211	397	0.7105
2021	07.21	C	12	600	51995	361	2016	1655	397	429	581	970	1651	0.1791	0.821	4.4735	4.584	0.368	0.7795	0.2205	0.1934	0.4431	31.4564	37.8785	0.0524	1.4668	0.2627	1.2042	0.7611	0.266	0.8209	0.632	0.5188	0.3489	0.1811	0.220505	0.779495	246.114	361	64.6434	296.357	187.305	65.3596	2016	361	1655	1046	365	0.6817
2021	07.21	C	12	500	49597	336	1962	1626	365	397	532	911	1580	0.1713	0.829	5.3764	4.839	0.3536	0.7651	0.2349	0.1968	0.4018	30.5418	34.7026	0.0611	1.371	0.2348	1.1362	0.7344	0.267	0.8287	0.6464	0.5357	0.3635	0.1947	0.234966	0.765034	245.077	336	57.5413	278.459	179.988	65.419	1962	336	1626	1051	382	0.7294
2021	07.21	C	12	400	45696	346	1965	1619	380	411	553	946	1605	0.1761	0.824	4.7446	4.679	0.3706	0.7776	0.2224	0.1915	0.4262	28.2641	32.5038	0.0707	1.3958	0.2458	1.15	0.7238	0.256	0.8239	0.6294	0.5186	0.3533	0.1832	0.222367	0.777633	247.887	346	60.9242	285.076	179.427	63.3893	1965	346	1619	1019	360	0.7165
2021	07.21	C	12	600	55427	415	2153	1738	449	480	613	978	1748	0.1928	0.807	5.0156	4.188	0.3239	0.767	0.233	0.1784	0.3797	31.9308	37.4322	0.0532	1.4522	0.2799	1.1723	0.7925	0.273	0.8072	0.6761	0.5458	0.3447	0.1881	0.233052	0.766948	285.773	415	79.993	335.007	226.486	78.0655	2153	415	1738	1175	405	0.6886
2021	07.21	C	12	600	53689	394	1964	1570	431	462	611	990	1577	0.2006	0.799	3.5744	3.985	0.3796	0.7535	0.2465	0.1975	0.4607	34.2364	41.5509	0.0571	1.5182	0.3046	1.2136	0.7529	0.299	0.7994	0.6204	0.4959	0.3973	0.197	0.246485	0.753515	259.518	394	79.0407	314.959	195.395	77.6365	1964	394	1570	974	387	0.6587
2021	07.21	C	12	600	53080	374	1917	1543	405	432	569	947	1509	0.1951	0.805	4.1297	4.126	0.3714	0.7356	0.2644	0.175	0.4213	34.4399	39.068	0.0574	1.4093	0.275	1.1344	0.7131	0.3	0.8049	0.6286	0.506	0.4206	0.2128	0.264389	0.735611	265.38	374	72.9661	301.034	189.244	79.5994	1917	374	1543	970	408	0.7096
2021	07.21	C	13	700	60922	345	1827	1482	372	401	529	913	1473	0.1888	0.811	4.3272	4.296	0.3833	0.7611	0.2389	0.1957	0.4139	41.1078	44.3887	0.0587	1.3312	0.2514	1.0798	0.666	0.258	0.8112	0.6167	0.5003	0.3873	0.1938	0.238848	0.761152	259.165	345	65.1478	279.852	172.594	66.8473	1827	345	1482	914	354	0.7512
2021	07.21	C	13	900	72586	379	1777	1398	404	427	536	888	1409	0.2133	0.787	4.108	3.689	0.3641	0.7368	0.2632	0.1645	0.3743	51.9212	53.3832	0.0577	1.3069	0.2787	1.0282	0.6538	0.271	0.7867	0.6359	0.5003	0.4139	0.2071	0.263199	0.736801	289.999	379	80.8334	298.167	189.607	78.4873	1777	379	1398	889	368	0.7652
2021	07.21	C	13	600	54167	410	1929	1519	445	476	620	1018	1596	0.2125	0.787	3.164	3.705	0.4003	0.7808	0.2192	0.2041	0.4608	35.6598	41.0556	0.0594	1.4621	0.3108	1.1513	0.6905	0.252	0.7875	0.5997	0.4723	0.3655	0.1726	0.21919	0.78081	280.419	410	87.1436	322.856	193.629	70.7776	1929	410	1519	911	333	0.684
2021	07.21	C	13	700	62333	538	2126	1588	568	596	722	1091	1741	0.2531	0.747	3.1004	2.952	0.3482	0.7576	0.2424	0.1763	0.3862	39.2524	43.5349	0.0561	1.4849	0.3758	1.1091	0.7229	0.269	0.7469	0.6518	0.4868	0.372	0.1811	0.24247	0.75753	362.314	538	136.145	401.855	261.914	97.4271	2126	538	1588	1035	385	0.6735
2021	07.21	C	13	600	48578	634	2163	1529	670	703	825	1116	1816	0.2931	0.707	2.3363	2.412	0.3152	0.7731	0.2269	0.2158	0.4164	31.7709	41.9658	0.053	1.8686	0.5477	1.3209	0.9045	0.3	0.7069	0.6848	0.484	0.3314	0.1604	0.226943	0.773057	339.291	634	185.833	448.167	306.888	101.71	2163	634	1529	1047	347	0.5352
2021	07.21	C	13	700	35846	538	1519	981	563	585	684	937	1185	0.3542	0.646	1.1736	1.823	0.4067	0.6595	0.3405	0.2243	0.4961	36.5401	44.5685	0.0522	1.8886	0.6689	1.2197	0.7236	0.415	0.6458	0.5933	0.3831	0.5739	0.2199	0.340495	0.659505	284.867	538	190.549	347.451	206.133	118.296	1519	538	981	582	334	0.5295
2021	07.21	C	13	600	45058	473	1684	1211	498	521	622	912	1315	0.2809	0.719	2.3848	2.56	0.3625	0.6953	0.3047	0.1899	0.4101	37.2069	42.0943	0.062	1.5733	0.4419	1.1314	0.7212	0.345	0.7191	0.6375	0.4584	0.478	0.2191	0.304725	0.695275	300.642	473	132.856	340.144	216.839	103.644	1684	473	1211	772	369	0.6356
2021	07.21	C	13	600	49383	539	1788	1249	562	595	719	1057	1443	0.3015	0.699	1.6434	2.317	0.4147	0.7238	0.2762	0.2642	0.4804	39.5378	45.7966	0.0659	1.6582	0.4999	1.1583	0.6779	0.32	0.6985	0.5853	0.4088	0.472	0.193	0.276262	0.723738	325.051	539	162.484	376.516	220.363	104.002	1788	539	1249	731	345	0.6031
2021	07.21	C	13	675	53609.1	482	1851.62	1369.62	510.25	538	657.125	991.5	1497.25	0.262175	0.737875	2.77971	2.96925	0.374375	0.736	0.264	0.20435	0.429775	39.1246	44.5984	0.058125	1.57172	0.421887	1.14984	0.72005	0.30375	0.737825	0.625625	0.46175	0.42425	0.193375	0.265421	0.734579	306.669	482	130.124	351.876	220.996	92.6489	1851.62	482	1369.62	860.125	354.375	0.647163
2021	07.21	C	14	700	61248	346	1830	1484	376	402	535	897	1422	0.1891	0.811	4.2924	4.289	0.3713	0.7251	0.2749	0.1752	0.4245	41.2722	47.1896	0.059	1.41	0.2666	1.1434	0.7188	0.314	0.8109	0.6287	0.5098	0.4373	0.223	0.274931	0.725069	245.39	346	65.4186	280.581	176.403	77.141	1830	346	1484	933	408	0.7092
2021	07.21	C	14	700	51262	391	1824	1433	427	461	601	920	1444	0.2144	0.786	3.0987	3.665	0.3692	0.7348	0.2652	0.2373	0.4885	35.7723	47.3358	0.0511	1.6843	0.3611	1.3233	0.8348	0.351	0.7856	0.6308	0.4956	0.4204	0.2083	0.265188	0.734812	232.144	391	83.8163	307.184	193.785	81.4583	1824	391	1433	904	380	0.5937
2021	07.21	C	14	600	43951	403	1792	1389	439	471	621	986	1499	0.2249	0.775	2.4693	3.447	0.4197	0.7891	0.2109	0.2304	0.5232	31.6425	39.4401	0.0527	1.6081	0.3616	1.2464	0.7233	0.263	0.7751	0.5803	0.4498	0.3635	0.1635	0.210939	0.789061	250.606	403	90.63	312.37	181.26	65.8923	1792	403	1389	806	293	0.6219
2021	07.21	C	14	600	39581	521	1753	1232	553	583	705	995	1417	0.2972	0.703	1.7116	2.365	0.3847	0.7273	0.2727	0.2435	0.4978	32.1274	41.5714	0.0535	1.8412	0.5472	1.294	0.7961	0.353	0.7028	0.6153	0.4324	0.4433	0.1917	0.272762	0.727238	282.968	521	154.844	366.156	225.281	99.8608	1753	521	1232	758	336	0.5431
2021	07.21	C	14	400	32572	404	1533	1129	448	488	642	905	1232	0.2635	0.736	1.3576	2.795	0.4438	0.7334	0.2666	0.3543	0.7027	28.8506	45.685	0.0721	2.1501	0.5666	1.5835	0.8808	0.422	0.7365	0.5562	0.4097	0.4793	0.1963	0.266587	0.733413	187.898	404	106.468	297.532	165.5	79.3242	1533	404	1129	628	301	0.4651
2021	07.21	C	14	500	39170	553	1604	1051	576	598	678	902	1239	0.3448	0.655	1.7484	1.901	0.3321	0.6527	0.3473	0.2093	0.3964	37.269	44.4949	0.0745	1.8221	0.6282	1.1939	0.7974	0.415	0.6552	0.6679	0.4377	0.5199	0.2276	0.347241	0.652759	303.496	553	190.654	362.346	242.024	125.838	1604	553	1051	702	365	0.5488
2021	07.21	C	14	600	42883	437	1557	1120	465	490	599	896	1224	0.2807	0.719	1.8806	2.563	0.4098	0.7027	0.2973	0.2232	0.4821	38.2882	45.0449	0.0638	1.6355	0.459	1.1765	0.6943	0.35	0.7193	0.5902	0.4245	0.5038	0.2139	0.297343	0.702657	267.197	437	122.652	314.348	185.522	93.4624	1557	437	1120	661	333	0.6114
2021	07.21	C	14	600	45722.8	413	1746.4	1333.4	448.6	481	620.8	940.6	1402.8	0.23782	0.7622	2.58592	3.3122	0.39774	0.74194	0.25806	0.24814	0.52734	33.933	44.2444	0.05768	1.73874	0.42062	1.31812	0.79076	0.3406	0.76218	0.60226	0.45946	0.42876	0.19656	0.258225	0.741775	237.528	413	100.235	312.765	188.446	80.7353	1746.4	413	1333.4	805.8	343.6	0.5866
2021	07.21	C	14	585.714	44381	436.429	1699	1262.57	469.143	499	625.857	928.714	1353.86	0.259229	0.740714	2.36551	3.00357	0.390086	0.723586	0.276414	0.239029	0.502171	35.0317	44.3945	0.0609571	1.7359	0.455757	1.28014	0.777929	0.352571	0.740771	0.609914	0.451357	0.4525	0.203471	0.275986	0.724014	251.413	436.429	116.355	320.074	195.682	88.9968	1699	436.429	1262.57	770.286	345.143	0.584743
2021	07.21	C	15	700	63315	366	1845	1479	397	416	547	920	1462	0.1984	0.802	4.1387	4.041	0.3746	0.741	0.259	0.1285	0.4079	42.8095	46.6217	0.0612	1.3586	0.2695	1.089	0.6811	0.282	0.8016	0.6254	0.5014	0.4141	0.2076	0.258978	0.741022	269.395	366	72.6049	293.395	183.496	75.9772	1845	366	1479	925	383	0.7361
2021	07.21	C	15	290	52100	356	1879	1523	384	412	534	912	1506	0.1895	0.811	4.7094	4.278	0.3651	0.7551	0.2449	0.1838	0.3896	34.2087	36.5057	0.118	1.3166	0.2494	1.0671	0.6776	0.261	0.8105	0.6349	0.5146	0.3857	0.1985	0.244881	0.755119	270.393	356	67.4486	288.551	183.21	70.6695	1879	356	1523	967	373	0.7595
2021	07.21	C	15	700	63623	369	2008	1639	399	427	557	943	1615	0.1838	0.816	5.1345	4.442	0.3502	0.7602	0.2398	0.1708	0.3823	38.8181	42.3798	0.0555	1.3375	0.2458	1.0918	0.7094	0.262	0.8162	0.6498	0.5304	0.369	0.1957	0.239776	0.760224	275.888	369	67.8093	301.191	195.71	72.2196	2008	369	1639	1065	393	0.7476
2021	07.21	C	15	700	60460	341	1909	1568	371	400	531	905	1534	0.1786	0.821	4.9894	4.598	0.3597	0.7608	0.2392	0.1849	0.4039	38.5584	43.2984	0.0551	1.3671	0.2442	1.1229	0.719	0.269	0.8214	0.6403	0.5259	0.3735	0.1964	0.239152	0.760848	249.433	341	60.912	280.088	179.342	66.9853	1909	341	1568	1004	375	0.7315
2021	07.21	C	15	700	59996	360	1895	1535	391	421	563	949	1525	0.19	0.81	4.0238	4.264	0.3837	0.759	0.241	0.1954	0.4408	39.0855	44.903	0.0558	1.4183	0.2694	1.1488	0.708	0.277	0.81	0.6163	0.4992	0.3911	0.1953	0.241035	0.758965	253.825	360	68.3905	291.61	179.715	70.2902	1895	360	1535	946	370	0.7051
2021	07.21	C	15	700	58293	362	1838	1476	392	413	540	914	1476	0.197	0.803	4.2492	4.077	0.374	0.7547	0.2453	0.1423	0.402	39.4939	42.4511	0.0564	1.3385	0.2636	1.0749	0.6729	0.264	0.803	0.626	0.5027	0.3918	0.197	0.245267	0.754733	270.452	362	71.2971	290.703	181.985	71.2971	1838	362	1476	924	362	0.7471
2021	07.21	C	15	700	60628	341	1838	1497	370	397	516	885	1476	0.1855	0.814	4.8679	4.39	0.3634	0.7582	0.2418	0.1804	0.3897	40.4994	43.4276	0.0579	1.3166	0.2443	1.0723	0.6826	0.259	0.8145	0.6366	0.5185	0.3799	0.197	0.241844	0.758156	259	341	63.265	277.735	176.808	67.161	1838	341	1497	953	362	0.7596
2021	07.21	C	15	600	60182	377	2019	1642	411	445	596	990	1636	0.1867	0.813	4.1608	4.355	0.3733	0.7667	0.2333	0.2071	0.4446	36.6519	43.6475	0.0611	1.4643	0.2734	1.1909	0.7463	0.278	0.8133	0.6267	0.5097	0.3722	0.1897	0.233258	0.766742	257.461	377	70.3957	306.604	192.141	71.5161	2019	377	1642	1029	383	0.6829
2021	07.21	C	15	600	52984	365	1909	1544	400	424	567	949	1524	0.1912	0.809	4.065	4.23	0.3782	0.7506	0.2494	0.1554	0.4361	34.3159	39.5652	0.0572	1.4255	0.2726	1.153	0.7169	0.287	0.8088	0.6218	0.5029	0.401	0.2017	0.249342	0.750658	256.051	365	69.7878	295.212	183.552	73.6118	1909	365	1544	960	385	0.7015
2021	07.21	C	16	600	58836	372	2084	1712	406	436	585	993	1725	0.1785	0.821	4.8412	4.602	0.3627	0.7903	0.2097	0.1752	0.4147	34.367	39.2924	0.0573	1.3917	0.2484	1.1433	0.7286	0.24	0.8215	0.6373	0.5235	0.3291	0.1723	0.209735	0.790265	267.299	372	66.4031	305.597	194.747	64.0825	2084	372	1712	1091	359	0.7185
2021	07.21	C	16	300	44414	364	2013	1649	411	445	628	1020	1701	0.1808	0.819	3.4896	4.53	0.3978	0.8108	0.1892	0.2062	0.5337	26.9339	36.1309	0.0898	1.6376	0.2961	1.3415	0.8078	0.254	0.8192	0.6022	0.4933	0.3142	0.155	0.189211	0.810789	222.277	364	65.8202	298.18	179.559	56.4173	2013	364	1649	993	312	0.6107
2021	07.21	C	16	500	51535	328	1930	1602	361	389	525	915	1593	0.1699	0.83	5.222	4.884	0.3664	0.7896	0.2104	0.1748	0.4099	32.1692	35.9871	0.0643	1.3477	0.229	1.1187	0.7088	0.235	0.8301	0.6336	0.5259	0.332	0.1746	0.210355	0.789645	243.378	328	55.743	272.257	172.497	57.2725	1930	328	1602	1015	337	0.742
2021	07.21	C	16	400	54722	457	2056	1599	489	519	657	1015	1668	0.2223	0.778	3.5409	3.499	0.349	0.7573	0.2427	0.1876	0.4169	34.2224	40.887	0.0856	1.5362	0.3415	1.1947	0.7778	0.29	0.7777	0.651	0.5063	0.3727	0.1887	0.242628	0.757372	297.487	457	101.58	355.42	231.39	86.2432	2056	457	1599	1041	388	0.651
2021	07.21	C	16	700	59138	364	1921	1557	397	424	564	936	1543	0.1895	0.811	4.2687	4.277	0.3674	0.7572	0.2428	0.1734	0.4282	37.9821	44.2681	0.0543	1.438	0.2725	1.1655	0.7373	0.283	0.8105	0.6326	0.5128	0.3838	0.1968	0.242792	0.757208	253.129	364	68.9724	295.028	186.642	71.6252	1921	364	1557	985	378	0.6954
2021	07.21	C	16	700	55127	366	1977	1611	410	446	623	1006	1635	0.1851	0.815	3.3879	4.402	0.3973	0.7877	0.2123	0.2235	0.5318	34.219	45.8035	0.0489	1.6426	0.3041	1.3385	0.8068	0.284	0.8149	0.6027	0.4911	0.3522	0.173	0.212271	0.787729	222.817	366	67.7572	298.243	179.76	63.3141	1977	366	1611	971	342	0.6088
2021	07.21	C	16	290	47792	396	2263	1867	433	466	619	1083	1924	0.175	0.825	5.1455	4.715	0.368	0.8184	0.1816	0.1768	0.3981	25.5985	27.6975	0.0883	1.3115	0.2295	1.082	0.6839	0.196	0.825	0.632	0.5214	0.2873	0.1498	0.181574	0.818426	301.944	396	69.2956	326.704	206.487	59.3213	2263	396	1867	1180	339	0.7625
2021	07.21	C	16	700	63458	364	1887	1523	394	420	550	932	1514	0.1929	0.807	4.3347	4.184	0.3729	0.7551	0.2449	0.1707	0.4071	41.6665	45.481	0.0595	1.3524	0.2609	1.0915	0.6845	0.267	0.8071	0.6271	0.5061	0.3906	0.1977	0.244945	0.755055	269.151	364	70.2152	293.785	184.218	71.9512	1887	364	1523	955	373	0.7394
2021	07.21	C	16	600	58430	393	2157	1764	433	466	635	1057	1780	0.1822	0.818	4.1713	4.489	0.3764	0.7863	0.2137	0.1871	0.4573	33.1235	40.2404	0.0552	1.4855	0.2707	1.2149	0.7576	0.26	0.8178	0.6236	0.51	0.3427	0.1748	0.213708	0.786292	264.557	393	71.6036	321.396	200.417	68.6885	2157	393	1764	1100	377	0.6732
2021	07.21	CS	17	600	48981	395	2282	1887	446	490	691	1107	1953	0.1731	0.827	3.9203	4.777	0.3773	0.8256	0.1744	0.2332	0.5229	25.9965	36.0252	0.0433	1.6758	0.2901	1.3858	0.8629	0.242	0.8269	0.6227	0.5149	0.28	0.1442	0.174356	0.825644	235.708	395	68.372	326.628	203.385	56.9479	2282	395	1887	1175	329	0.5967
2021	07.21	CS	17	600	46381	382	2196	1814	446	501	744	1159	1878	0.174	0.826	2.8092	4.749	0.4283	0.8247	0.1753	0.3032	0.6652	25.6075	39.7679	0.0427	1.88	0.327	1.553	0.8878	0.272	0.826	0.5717	0.4722	0.3067	0.1448	0.17534	0.82466	203.191	382	66.4499	315.55	180.389	55.3169	2196	382	1814	1037	318	0.5319
2021	07.21	CS	17	600	47689	417	2235	1818	457	495	658	1067	1886	0.1866	0.813	4.2967	4.36	0.3575	0.808	0.192	0.209	0.4419	26.2707	32.4679	0.0438	1.5194	0.2835	1.2359	0.794	0.237	0.8134	0.6425	0.5226	0.2988	0.1562	0.191979	0.808021	274.45	417	77.8027	339.197	217.922	65.1154	2235	417	1818	1168	349	0.6582
2021	07.21	CS	17	290	31249	373	1267	894	407	437	558	801	1010	0.2944	0.706	1.065	2.397	0.4787	0.7125	0.2875	0.3356	0.6898	34.9929	50.4181	0.1207	2.042	0.6011	1.4408	0.751	0.414	0.7056	0.5213	0.3678	0.5515	0.2028	0.287497	0.712503	182.664	373	109.81	263.19	137.189	75.6598	1267	373	894	466	257	0.4897
2021	07.21	CS	17	500	42840	321	1868	1547	356	388	543	943	1554	0.1718	0.828	4.1575	4.819	0.4021	0.797	0.203	0.2069	0.4783	27.7313	32.9922	0.0555	1.4366	0.2469	1.1897	0.7114	0.241	0.8282	0.5979	0.4952	0.3395	0.1681	0.202987	0.797013	223.444	321	55.1611	265.839	158.953	53.9582	1868	321	1547	925	314	0.6961
2021	07.21	CS	17	600	53272	373	2189	1816	413	448	619	1040	1830	0.1704	0.83	4.7163	4.869	0.3673	0.8023	0.1977	0.1927	0.4515	29.3741	36.1121	0.049	1.4819	0.2525	1.2294	0.7778	0.243	0.8296	0.6327	0.5249	0.3124	0.164	0.197655	0.802345	251.704	373	63.5582	309.442	195.787	61.1727	2189	373	1816	1149	359	0.6748
2021	07.21	CS	17	600	48561	411	2126	1715	456	496	680	1085	1759	0.1933	0.807	3.2566	4.173	0.393	0.786	0.214	0.2332	0.5228	28.3547	37.7222	0.0473	1.6492	0.3188	1.3304	0.8075	0.285	0.8067	0.607	0.4897	0.3525	0.1726	0.213967	0.786033	249.212	411	79.4548	331.545	201.247	70.9487	2126	411	1715	1041	367	0.6064
2021	07.21	CS	17	400	25418	618	1518	900	653	688	818	1065	1272	0.4071	0.593	0.4889	1.456	0.4967	0.7267	0.2733	0.3889	0.7407	28.2813	42.1794	0.0707	2.5155	1.0241	1.4914	0.7507	0.408	0.5929	0.5033	0.2984	0.543	0.1621	0.273292	0.726708	245.677	618	251.597	366.403	184.423	100.15	1518	618	900	453	246	0.3975
2021	07.21	CS	17	300	34566	562	1565	1003	596	624	738	962	1260	0.3591	0.641	0.9797	1.785	0.3988	0.6959	0.3041	0.2792	0.5849	34.5021	50.6031	0.115	2.2885	0.8218	1.4667	0.8818	0.446	0.6409	0.6012	0.3853	0.5058	0.1949	0.304087	0.695913	245.576	562	201.817	360.183	216.541	109.527	1565	562	1003	603	305	0.437
2021	07.21	CS	18	700	52673	385	1933	1548	426	461	626	1033	1582	0.1992	0.801	3.0062	4.021	0.4186	0.7733	0.2267	0.2261	0.5189	34.066	42.2321	0.0487	1.548	0.3083	1.2397	0.7208	0.281	0.8008	0.5814	0.4656	0.39	0.1816	0.226746	0.773254	248.708	385	76.6813	308.319	179.255	69.9095	1933	385	1548	900	351	0.646
2021	07.21	CS	18	800	53316	383	1722	1339	417	451	580	922	1356	0.2224	0.778	2.7599	3.496	0.4025	0.7267	0.2733	0.2539	0.4904	39.8568	48.5578	0.0498	1.5668	0.3485	1.2183	0.7279	0.333	0.7776	0.5975	0.4646	0.4575	0.2125	0.273356	0.726644	244.447	383	85.1852	297.815	177.933	81.4042	1722	383	1339	800	366	0.6383
2021	07.21	CS	18	600	75504	500	1993	1493	531	557	671	981	1494	0.2509	0.749	3.3095	2.986	0.3222	0.6658	0.3342	0.1741	0.3818	50.6112	59.9759	0.0844	1.5819	0.3969	1.185	0.8032	0.396	0.7491	0.6778	0.5078	0.4931	0.2504	0.334223	0.665777	316.076	500	125.439	374.561	253.889	125.188	1993	500	1493	1012	499	0.6322
2021	07.21	CS	18	600	39281	330	1405	1075	362	390	509	800	1084	0.2349	0.765	2.1061	3.258	0.4372	0.7014	0.2986	0.2605	0.555	36.5798	46.4382	0.061	1.6592	0.3897	1.2695	0.7145	0.379	0.7651	0.5628	0.4306	0.5306	0.2285	0.298622	0.701378	198.891	330	77.5089	252.491	142.1	75.395	1405	330	1075	605	321	0.6027
2021	07.21	CS	18	800	53648	386	1578	1192	413	436	548	868	1212	0.2446	0.755	2.5559	3.088	0.4044	0.693	0.307	0.193	0.453	45.0465	50.4671	0.0563	1.4831	0.3628	1.1203	0.6673	0.344	0.7554	0.5956	0.4499	0.5155	0.2319	0.307032	0.692968	260.266	386	94.4208	291.579	173.675	89.5285	1578	386	1192	710	366	0.6743
2021	07.21	CS	18	700	52687	383	1739	1356	408	436	551	882	1349	0.2202	0.78	3.5207	3.54	0.368	0.7124	0.2876	0.2065	0.413	38.8939	43.6484	0.0556	1.4392	0.317	1.1222	0.7093	0.323	0.7798	0.632	0.4928	0.4551	0.2243	0.287623	0.712377	266.12	383	84.3525	298.647	188.747	85.8942	1739	383	1356	857	390	0.6948
2021	07.21	CS	18	900	54094	388	1731	1343	419	446	572	915	1342	0.2241	0.776	2.9774	3.461	0.3924	0.7103	0.2897	0.201	0.4567	40.3178	46.9227	0.0448	1.5001	0.3362	1.1638	0.7071	0.337	0.7759	0.6076	0.4714	0.4767	0.2247	0.289643	0.710357	258.649	388	86.9694	301.031	182.905	87.1935	1731	388	1343	816	389	0.6666
2021	07.21	CS	18	800	48972	379	1553	1174	411	439	569	891	1211	0.244	0.756	2.0397	3.098	0.4361	0.7087	0.2913	0.2385	0.5395	41.7529	51.6475	0.0522	1.6363	0.3993	1.237	0.6975	0.36	0.756	0.5639	0.4263	0.5166	0.2202	0.291311	0.708689	231.62	379	92.4926	286.507	161.557	83.463	1553	379	1174	662	342	0.6111
2021	07.21	CS	18	700	47171	389	1497	1108	417	440	548	857	1158	0.2599	0.74	2.1214	2.848	0.4224	0.694	0.306	0.2076	0.4783	42.6127	48.258	0.0609	1.5301	0.3976	1.1325	0.6541	0.346	0.7401	0.5776	0.4275	0.5297	0.2265	0.305955	0.694045	254.232	389	101.083	287.917	166.306	88.0902	1497	389	1108	640	339	0.6536
2021	07.21	CS	19	600	56956	364	2088	1724	405	444	620	1039	1714	0.1743	0.826	4.0061	4.736	0.3915	0.7831	0.2169	0.2262	0.495	33.0765	41.8153	0.0551	1.5311	0.2669	1.2642	0.7692	0.274	0.8257	0.6085	0.5024	0.3565	0.1791	0.21693	0.78307	237.738	364	63.4559	300.544	182.872	65.1992	2088	364	1724	1049	374	0.6531
2021	07.21	CS	19	600	54470	386	2142	1756	428	467	643	1064	1768	0.1802	0.82	3.9108	4.549	0.3861	0.787	0.213	0.2221	0.4879	31.0587	39.2433	0.0518	1.5413	0.2777	1.2635	0.7757	0.269	0.8198	0.6139	0.5033	0.3469	0.1746	0.212962	0.787038	250.438	386	69.5593	316.441	194.261	67.3968	2142	386	1756	1078	374	0.6488
2021	07.21	CS	19	500	45442	382	2276	1894	435	477	680	1122	1946	0.1678	0.832	3.9944	4.958	0.3907	0.8258	0.1742	0.2218	0.5245	24.0319	32.2591	0.0481	1.6131	0.2707	1.3423	0.8179	0.234	0.8322	0.6093	0.507	0.286	0.145	0.17426	0.82574	236.811	382	64.1142	317.886	193.685	55.3866	2276	382	1894	1154	330	0.6199
2021	07.21	CS	19	600	49545	425	2296	1871	490	547	790	1223	1954	0.1851	0.815	2.6365	4.402	0.4265	0.8172	0.1828	0.3046	0.6503	26.5194	40.4327	0.0442	1.871	0.3463	1.5246	0.8744	0.279	0.8149	0.5735	0.4673	0.3187	0.149	0.182774	0.817226	227.151	425	78.6694	346.331	198.617	63.3057	2296	425	1871	1073	342	0.5345
2021	07.21	CS	19	700	65407	401	2055	1654	430	459	570	874	1682	0.1951	0.805	5.7999	4.125	0.286	0.7745	0.2255	0.1753	0.3406	39.5844	47.1442	0.0565	1.4797	0.2887	1.191	0.8504	0.269	0.8049	0.714	0.5747	0.3158	0.1815	0.225481	0.774519	271.001	401	78.2487	322.751	230.453	72.7849	2055	401	1654	1181	373	0.6758
2021	07.21	CS	19	400	47539	392	2365	1973	451	505	744	1199	2031	0.1658	0.834	3.4772	5.033	0.409	0.8307	0.1693	0.2737	0.5947	24.134	35.0895	0.0603	1.7428	0.2889	1.4539	0.8592	0.246	0.8342	0.591	0.493	0.2864	0.1412	0.169262	0.830738	224.925	392	64.9742	327.026	193.265	55.3607	2365	392	1973	1166	334	0.5738
2021	07.21	CS	19	700	48242	398	1875	1477	438	473	634	1016	1536	0.2123	0.788	2.6601	3.711	0.4184	0.7705	0.2295	0.237	0.5326	32.7011	41.626	0.0467	1.6159	0.343	1.2729	0.7403	0.292	0.7877	0.5816	0.4581	0.3946	0.1808	0.229499	0.770501	246.302	398	84.4821	313.518	182.337	71.9584	1875	398	1477	859	339	0.6188
2021	07.21	CS	19	700	53561	355	1865	1510	386	415	550	929	1462	0.1903	0.81	4.1326	4.254	0.3801	0.7331	0.2669	0.1921	0.4305	35.5102	40.2119	0.0507	1.3986	0.2662	1.1324	0.7019	0.302	0.8097	0.6199	0.5019	0.4306	0.2161	0.266929	0.733071	253.825	355	67.5737	287.426	178.166	76.7105	1865	355	1510	936	403	0.715
2021	07.21	CS	19	400	43152	327	1874	1547	364	394	543	928	1533	0.1745	0.826	4.276	4.731	0.3885	0.7796	0.2204	0.1939	0.4654	27.9332	33.4641	0.0698	1.4512	0.2532	1.198	0.7326	0.264	0.8255	0.6115	0.5048	0.3605	0.182	0.220446	0.779554	225.331	327	57.0592	269.941	165.07	59.5021	1874	327	1547	946	341	0.6891
2021	07.21	CS	20	500	49358	398	2403	2005	450	496	711	1161	2055	0.1656	0.834	4.1697	5.038	0.3805	0.8264	0.1736	0.2294	0.5204	24.6567	33.7158	0.0493	1.6388	0.2714	1.3674	0.847	0.237	0.8344	0.6195	0.5169	0.2802	0.1448	0.173584	0.826416	242.861	398	65.9193	332.081	205.708	57.638	2403	398	2005	1242	348	0.6102
2021	07.21	CS	20	600	52541	397	2216	1819	436	473	633	1037	1868	0.1792	0.821	4.6973	4.582	0.3518	0.8087	0.1913	0.2034	0.4325	28.9237	35.552	0.0482	1.4974	0.2683	1.2292	0.7967	0.235	0.8208	0.6482	0.532	0.2952	0.157	0.191349	0.808651	265.126	397	71.1232	325.877	211.22	62.3448	2216	397	1819	1179	348	0.6678
2021	07.21	CS	20	700	58896	386	1774	1388	417	450	574	856	1357	0.2176	0.782	3.4345	3.596	0.3386	0.6996	0.3004	0.2378	0.4515	42.4715	56.6286	0.0607	1.7041	0.3708	1.3333	0.8818	0.401	0.7824	0.6614	0.5175	0.4542	0.2351	0.300408	0.699592	226.513	386	83.9887	302.011	199.745	90.7339	1774	386	1388	918	417	0.5868
2021	07.21	CS	20	600	55821	407	2308	1901	443	477	638	1066	1933	0.1763	0.824	5.1711	4.671	0.3467	0.8027	0.1973	0.1789	0.405	29.4033	34.3559	0.049	1.4186	0.2502	1.1684	0.7634	0.23	0.8237	0.6533	0.5381	0.3019	0.1625	0.197231	0.802769	286.903	407	71.7717	335.228	219.018	66.1287	2308	407	1901	1242	375	0.7049
2021	07.21	CS	20	600	55602	382	2012	1630	414	444	580	947	1616	0.1899	0.81	4.6485	4.267	0.3466	0.7571	0.2429	0.184	0.4049	34.1509	39.8931	0.0569	1.4419	0.2738	1.1681	0.7632	0.284	0.8101	0.6534	0.5293	0.3718	0.1968	0.242934	0.757066	264.928	382	72.5268	309.473	202.202	75.1849	2012	382	1630	1065	396	0.6935
2021	07.21	CS	20	500	54798	388	2382	1994	436	479	678	1119	1992	0.1629	0.837	4.6841	5.139	0.3666	0.8044	0.1956	0.2156	0.4848	27.5209	36.3934	0.055	1.5797	0.2573	1.3224	0.8376	0.259	0.8371	0.6334	0.5302	0.3088	0.1637	0.195594	0.804406	245.616	388	63.2007	324.799	205.728	63.5264	2382	388	1994	1263	390	0.633
2021	07.21	CS	20	600	50260	371	2174	1803	406	438	585	989	1815	0.1707	0.829	5.5796	4.86	0.3428	0.8009	0.1991	0.1775	0.3956	27.9153	32.2216	0.0465	1.3918	0.2375	1.1543	0.7586	0.23	0.8293	0.6572	0.5451	0.303	0.1651	0.199132	0.800868	266.561	371	63.3123	307.688	202.224	61.2645	2174	371	1803	1185	359	0.7185
2021	07.21	CS	20	500	49270	394	2435	2041	445	492	711	1183	2096	0.1618	0.838	4.2872	5.18	0.3866	0.8339	0.1661	0.2303	0.5177	24.1794	32.3822	0.0484	1.5978	0.2585	1.3392	0.8215	0.222	0.8382	0.6134	0.5142	0.2708	0.1392	0.166109	0.833891	246.589	394	63.752	330.248	202.582	54.8526	2435	394	2041	1252	339	0.6259
2021	07.21	CS	20	600	54575	386	2123	1737	420	449	596	990	1722	0.1818	0.818	4.9661	4.5	0.3477	0.7691	0.2309	0.167	0.403	31.4583	36.4583	0.0524	1.4165	0.2575	1.1589	0.7559	0.268	0.8182	0.6523	0.5337	0.3539	0.1889	0.230849	0.769151	272.503	386	70.1818	315.818	206	72.9091	2123	386	1737	1133	401	0.706
2021	07.21	CS	21	700	53099	357	1663	1306	390	421	553	885	1332	0.2147	0.785	2.8509	3.658	0.4043	0.7466	0.2534	0.2374	0.5003	40.6972	50.3577	0.0581	1.5756	0.3382	1.2374	0.7371	0.314	0.7853	0.5957	0.4678	0.4254	0.199	0.253411	0.746589	226.58	357	76.638	280.362	167.015	71.0565	1663	357	1306	778	331	0.6347
2021	07.21	CS	21	700	68458	369	1834	1465	396	421	531	891	1431	0.2012	0.799	4.6152	3.97	0.3563	0.7249	0.2751	0.1706	0.3686	46.7686	48.3813	0.0668	1.295	0.2606	1.0345	0.6659	0.285	0.7988	0.6437	0.5142	0.4274	0.2197	0.275117	0.724883	284.942	369	74.2426	294.757	189.731	81.0834	1834	369	1465	943	403	0.7722
2021	07.21	CS	21	600	50860	336	1727	1391	367	394	527	890	1386	0.1946	0.805	3.653	4.14	0.3983	0.7549	0.2451	0.1941	0.4577	36.6027	42.0645	0.061	1.4268	0.2776	1.1492	0.6915	0.282	0.8054	0.6017	0.4847	0.4074	0.1975	0.245133	0.754867	235.492	336	65.3712	270.629	162.844	66.3439	1727	336	1391	837	341	0.7009
2021	07.21	CS	21	700	77653	423	1816	1393	449	473	577	882	1362	0.2329	0.767	3.8301	3.293	0.3295	0.6741	0.3259	0.1723	0.3685	55.7843	62.3877	0.0797	1.458	0.3396	1.1184	0.7499	0.364	0.7671	0.6705	0.5143	0.4861	0.25	0.32593	0.67407	290.123	423	98.5292	324.471	217.556	105.75	1816	423	1393	934	454	0.6859
2021	07.21	CS	21	700	51115	419	1745	1326	451	480	607	947	1396	0.2401	0.76	2.5519	3.165	0.3982	0.7368	0.2632	0.2187	0.4726	38.5876	45.7984	0.0551	1.5619	0.375	1.1869	0.7143	0.312	0.7599	0.6018	0.4573	0.4373	0.2	0.263167	0.736833	268.263	419	100.608	318.392	191.612	83.8	1745	419	1326	798	349	0.6402
2021	07.21	CS	21	800	61533	438	1898	1460	467	493	616	980	1502	0.2308	0.769	3.306	3.333	0.3712	0.7288	0.2712	0.1781	0.4064	42.1855	46.1809	0.0527	1.4231	0.3284	1.0947	0.6883	0.297	0.7692	0.6288	0.4837	0.4314	0.2086	0.271264	0.728736	307.779	438	101.077	336.923	211.846	91.3846	1898	438	1460	918	396	0.7027
2021	07.21	CS	21	600	39187	551	1577	1026	576	600	700	977	1246	0.3494	0.651	1.2196	1.862	0.4152	0.6774	0.3226	0.2339	0.4841	38.2329	44.5752	0.0637	1.792	0.6261	1.1659	0.6818	0.376	0.6506	0.5848	0.3805	0.5517	0.2099	0.322634	0.677366	307.478	551	192.518	358.482	209.639	115.651	1577	551	1026	600	331	0.558
2021	07.21	CS	21	700	53657	500	1807	1307	527	552	670	1007	1424	0.2767	0.723	2.2244	2.614	0.3879	0.707	0.293	0.1913	0.4336	41.0928	45.9289	0.0587	1.5453	0.4276	1.1177	0.6841	0.328	0.7233	0.6121	0.4427	0.4788	0.212	0.293073	0.706927	323.562	500	138.351	361.649	221.361	105.977	1807	500	1307	800	383	0.6471
2021	07.21	CS	21	500	40258	517	1768	1251	546	571	682	957	1398	0.2924	0.708	2.1039	2.42	0.3517	0.7042	0.2958	0.1998	0.4396	32.2202	40.2753	0.0644	1.7666	0.5166	1.25	0.8104	0.37	0.7076	0.6483	0.4587	0.4562	0.2093	0.295754	0.704246	292.653	517	151.182	365.818	237.153	108.196	1768	517	1251	811	370	0.5661
2021	07.21	CS	22	500	40454	662	1896	1234	689	716	822	1107	1513	0.3492	0.651	1.4957	1.864	0.3606	0.6896	0.3104	0.2188	0.4322	32.8223	39.3376	0.0656	1.8415	0.643	1.1985	0.7663	0.372	0.6508	0.6394	0.4161	0.4854	0.202	0.310365	0.689635	359.49	662	231.141	430.859	275.484	133.727	1896	662	1234	789	383	0.543
2021	07.21	CS	22	600	44509	406	1569	1163	431	456	557	834	1227	0.2588	0.741	2.5838	2.865	0.368	0.7059	0.2941	0.215	0.4328	38.3106	45.0537	0.0639	1.5866	0.4105	1.176	0.7432	0.346	0.7412	0.632	0.4685	0.4653	0.218	0.29407	0.70593	255.893	406	105.058	300.942	190.191	88.4971	1569	406	1163	735	342	0.6303
2021	07.21	CS	22	600	44363	456	1558	1102	478	501	590	840	1155	0.2927	0.707	2.2898	2.417	0.3485	0.6343	0.3657	0.2087	0.4053	40.2965	46.8727	0.0672	1.6445	0.4813	1.1632	0.7579	0.425	0.7073	0.6515	0.4608	0.5613	0.2587	0.365687	0.634313	277.288	456	133.463	322.537	210.146	117.951	1558	456	1102	718	403	0.6081
2021	07.21	CS	22	700	51866	428	1938	1510	460	490	624	975	1575	0.2208	0.779	3.3765	3.528	0.3623	0.7596	0.2404	0.1987	0.4327	34.3874	41.0721	0.0491	1.5329	0.3385	1.1944	0.7617	0.287	0.7792	0.6377	0.4969	0.3769	0.1873	0.240349	0.759651	279.209	428	94.5222	333.478	212.675	80.1672	1938	428	1510	963	363	0.6523
2021	07.21	CS	22	700	42573	462	1623	1161	487	513	617	906	1235	0.2847	0.715	2.0789	2.513	0.3824	0.6658	0.3342	0.2239	0.445	36.7083	42.7161	0.0524	1.6267	0.4631	1.1637	0.7186	0.389	0.7153	0.6176	0.4418	0.5411	0.2391	0.334183	0.665817	284.011	462	131.512	330.488	204.1	110.447	1623	462	1161	717	388	0.6147
2021	07.21	CS	22	700	56552	601	1989	1388	630	656	780	1110	1591	0.3022	0.698	1.9785	2.309	0.3667	0.7133	0.2867	0.1873	0.4299	40.783	47.8072	0.0583	1.6798	0.5076	1.1722	0.7424	0.336	0.6978	0.6333	0.4419	0.4528	0.2001	0.286758	0.713242	357.781	601	181.599	419.401	265.6	120.26	1989	601	1388	879	398	0.5953
2021	07.21	CS	22	700	45899	367	1505	1138	386	407	474	677	1151	0.2439	0.756	4.536	3.101	0.2724	0.6889	0.3111	0.1845	0.3134	40.3724	46.4499	0.0577	1.5216	0.371	1.1505	0.8371	0.358	0.7561	0.7276	0.5502	0.4275	0.2352	0.311049	0.688951	241.193	367	89.4944	277.506	201.911	86.3243	1505	367	1138	828	354	0.6572
2021	07.21	CS	22	500	33030	395	1405	1010	415	438	505	696	1155	0.2811	0.719	2.9618	2.557	0.298	0.7525	0.2475	0.2277	0.363	32.7428	39.886	0.0655	1.6946	0.4764	1.2182	0.8551	0.302	0.7189	0.702	0.5046	0.3526	0.1779	0.247525	0.752475	233.093	395	111.05	283.95	199.327	70.2847	1405	395	1010	709	250	0.5901
2021	07.21	CS	22	625	44905.8	472.125	1685.38	1213.25	497	522.125	621.125	893.125	1325.25	0.279175	0.72075	2.66262	2.64425	0.344863	0.701237	0.298763	0.208075	0.406787	37.0529	43.6494	0.0599625	1.64102	0.461425	1.17959	0.772787	0.351875	0.720825	0.655137	0.4726	0.457862	0.214788	0.299963	0.700037	287.701	472.125	134.73	337.395	219.929	100.957	1685.38	472.125	1213.25	792.25	360.125	0.611375
2021	07.21	CS	23	700	59325	380	2043	1663	413	440	569	970	1677	0.186	0.814	5.056	4.376	0.3548	0.7799	0.2201	0.1624	0.3788	35.6738	38.0923	0.051	1.3118	0.244	1.0678	0.689	0.235	0.814	0.6452	0.5252	0.3411	0.1791	0.220078	0.779922	289.678	380	70.6804	309.32	199.579	68.0764	2043	380	1663	1073	366	0.7623
2021	07.21	CS	23	600	54125	382	2103	1721	416	447	597	1017	1780	0.1816	0.818	4.6558	4.505	0.369	0.8123	0.1877	0.1801	0.4164	31.4497	35.4944	0.0524	1.3791	0.2505	1.1286	0.7122	0.212	0.8184	0.631	0.5164	0.2974	0.1536	0.187659	0.812341	276.992	382	69.3885	312.611	197.267	58.6714	2103	382	1721	1086	323	0.7251
2021	07.21	CS	23	600	51831	316	1834	1518	347	372	495	849	1501	0.1723	0.828	5.4699	4.804	0.3511	0.7806	0.2194	0.1647	0.3931	34.1445	38.223	0.0569	1.3525	0.233	1.1194	0.7264	0.246	0.8277	0.6489	0.5371	0.3381	0.1816	0.219393	0.780607	233.641	316	54.4471	261.553	169.716	57.3762	1834	316	1518	985	333	0.7394
2021	07.21	CS	23	700	58807	344	1830	1486	371	395	507	850	1474	0.188	0.812	5.2724	4.32	0.3405	0.7604	0.2396	0.1615	0.3656	39.574	42.4938	0.0565	1.3224	0.2486	1.0738	0.7081	0.257	0.812	0.6595	0.5355	0.3633	0.1945	0.239596	0.760404	260.133	344	64.6645	279.336	184.219	66.9202	1830	344	1486	980	356	0.7562
2021	07.21	CS	23	600	46297	432	2263	1831	481	523	732	1183	1962	0.1909	0.809	3.0864	4.238	0.4102	0.8356	0.1644	0.2294	0.5461	25.2853	33.6689	0.0421	1.6457	0.3142	1.3316	0.7854	0.219	0.8091	0.5898	0.4772	0.2787	0.133	0.164377	0.835623	262.502	432	82.4675	349.533	206.169	57.46	2263	432	1831	1080	301	0.6076
2021	07.21	CS	23	700	61267	335	1822	1487	361	385	501	861	1459	0.1839	0.816	5.2431	4.439	0.3537	0.7559	0.2441	0.1614	0.3721	41.2017	43.3427	0.0589	1.289	0.237	1.052	0.6799	0.257	0.8161	0.6463	0.5274	0.3777	0.1992	0.244108	0.755892	259.891	335	61.5944	273.406	176.693	66.7426	1822	335	1487	961	363	0.7758
2021	07.21	CS	23	600	57748	458	2165	1707	498	536	696	1090	1781	0.2115	0.788	3.3183	3.727	0.3702	0.775	0.225	0.2226	0.4648	33.8301	42.466	0.0564	1.5921	0.3368	1.2553	0.7905	0.282	0.7885	0.6298	0.4965	0.3572	0.1774	0.224965	0.775035	287.67	458	96.8887	361.111	227.413	81.2342	2165	458	1707	1075	384	0.6281
2021	07.21	CS	23	600	46478	491	1962	1471	535	578	757	1115	1641	0.2503	0.75	1.7881	2.996	0.4242	0.7818	0.2182	0.2923	0.6028	31.5963	44.8965	0.0527	1.8952	0.4743	1.4209	0.8182	0.31	0.7497	0.5758	0.4317	0.379	0.1636	0.218228	0.781772	259.076	491	122.875	368.125	211.966	80.3318	1962	491	1471	847	321	0.5276
2021	07.21	CS	23	700	61618	494	2018	1524	523	548	666	1029	1597	0.2448	0.755	3.3491	3.085	0.351	0.7238	0.2762	0.164	0.3762	40.4319	43.3289	0.0578	1.419	0.3474	1.0717	0.6954	0.296	0.7552	0.649	0.4901	0.4257	0.2086	0.276279	0.723721	348.132	494	120.93	373.07	242.104	103.059	2018	494	1524	989	421	0.7047
2021	07.21	CS	24	700	60593	382	1963	1581	410	426	549	891	1557	0.1946	0.805	5.3493	4.139	0.3219	0.7432	0.2568	0.1012	0.3521	38.3652	41.958	0.0548	1.3579	0.2642	1.0936	0.7415	0.281	0.8054	0.6781	0.5461	0.3787	0.2068	0.256796	0.743204	281.317	382	74.3372	307.663	208.611	79.0076	1963	382	1581	1072	406	0.7364
2021	07.21	CS	24	600	46950	326	1847	1521	359	389	529	870	1490	0.1765	0.823	4.6229	4.666	0.3577	0.7653	0.2347	0.1972	0.4449	30.9071	38.4445	0.0515	1.5105	0.2666	1.2439	0.799	0.292	0.8235	0.6423	0.529	0.3654	0.1933	0.234696	0.765304	215.823	326	57.5398	268.46	172.443	63.0114	1847	326	1521	977	357	0.662
2021	07.21	CS	24	500	38771	577	1653	1076	593	608	668	900	1343	0.3491	0.651	2.5111	1.865	0.3002	0.7119	0.2881	0.1394	0.2819	36.0717	33.8753	0.0721	1.4427	0.5036	0.9391	0.6572	0.271	0.6509	0.6998	0.4555	0.4117	0.1875	0.288108	0.711892	399.945	577	201.409	375.591	262.844	108.209	1653	577	1076	753	310	0.6931
2021	07.21	CS	24	500	40166	327	1720	1393	365	397	565	940	1407	0.1901	0.81	2.8267	4.26	0.4401	0.7753	0.2247	0.2297	0.5695	28.8732	37.3671	0.0577	1.598	0.3038	1.2942	0.7247	0.291	0.8099	0.5599	0.4535	0.4013	0.182	0.224688	0.775312	204.631	327	62.168	264.832	148.291	59.5064	1720	327	1393	780	313	0.6258
2021	07.21	CS	24	600	46649	392	2106	1714	452	505	741	1146	1807	0.1861	0.814	2.4472	4.372	0.4399	0.8256	0.1744	0.3092	0.6787	27.2555	42.0521	0.0454	1.8957	0.3529	1.5429	0.8642	0.269	0.8139	0.5601	0.4558	0.3115	0.142	0.174471	0.825529	206.784	392	72.9649	319.035	178.69	55.6543	2106	392	1714	960	299	0.5275
2021	07.21	CS	24	600	50071	400	2110	1710	447	491	686	1123	1788	0.1896	0.81	2.9891	4.275	0.4228	0.8117	0.1883	0.2573	0.5575	29.3204	38.6613	0.0489	1.627	0.3084	1.3186	0.7611	0.248	0.8104	0.5772	0.4678	0.3262	0.1526	0.188283	0.811717	245.851	400	75.8294	324.171	187.109	61.0427	2110	400	1710	987	322	0.6146
2021	07.21	CS	24	700	56403	367	1904	1537	405	429	596	996	1541	0.1928	0.807	3.3512	4.188	0.4092	0.7638	0.2362	0.1561	0.4966	36.7363	44.5819	0.0525	1.5033	0.2898	1.2136	0.7169	0.287	0.8072	0.5908	0.4769	0.3998	0.1907	0.236202	0.763798	244.13	367	70.74	296.26	175.019	69.969	1904	367	1537	908	363	0.6652
2021	07.21	CS	24	800	51802	405	1735	1330	439	469	614	971	1348	0.2334	0.767	2.3006	3.284	0.4256	0.709	0.291	0.2256	0.5238	38.9878	47.9886	0.0487	1.6057	0.3748	1.2309	0.7071	0.358	0.7666	0.5744	0.4403	0.5065	0.2231	0.290934	0.709066	252.226	405	94.5389	310.461	178.34	90.3372	1735	405	1330	764	387	0.6228
2021	07.21	CS	24	800	60973	429	1654	1225	467	500	647	976	1310	0.2594	0.741	1.6443	2.855	0.4465	0.7192	0.2808	0.2694	0.5932	49.8132	66.1747	0.0623	1.7937	0.4652	1.3285	0.7353	0.373	0.7406	0.5535	0.4099	0.5074	0.208	0.280846	0.719154	239.17	429	111.27	317.73	175.854	89.2237	1654	429	1225	678	344	0.5575
2021	07.21	AS	25	600	49172	365	1969	1604	412	453	647	1048	1616	0.1854	0.815	2.9229	4.395	0.4258	0.7799	0.2201	0.2556	0.586	30.6947	42.2446	0.0512	1.6895	0.3132	1.3763	0.7902	0.303	0.8146	0.5742	0.4678	0.3833	0.1793	0.220091	0.779909	216.04	365	67.6612	297.339	170.729	65.4368	1969	365	1604	921	353	0.5919
2021	07.21	AS	25	600	40247	346	1865	1519	401	450	674	1040	1565	0.1855	0.814	2.2484	4.39	0.4569	0.8025	0.1975	0.3226	0.7198	26.5348	41.8032	0.0442	1.9343	0.3588	1.5754	0.8556	0.311	0.8145	0.5431	0.4424	0.3636	0.1609	0.197471	0.802529	178.876	346	64.1909	281.809	153.056	55.6568	1865	346	1519	825	300	0.517
2021	07.21	AS	25	600	49032	402	1941	1539	450	491	678	1059	1606	0.2071	0.793	2.4251	3.828	0.4269	0.7823	0.2177	0.2664	0.5978	31.8985	44.6675	0.0532	1.7661	0.3658	1.4003	0.8025	0.305	0.7929	0.5731	0.4544	0.3798	0.1726	0.217663	0.782337	227.62	402	83.2581	318.742	182.671	69.3818	1941	402	1539	882	335	0.5662
2021	07.21	AS	25	700	53512	368	1358	990	401	434	562	785	1049	0.271	0.729	1.4482	2.69	0.4212	0.6879	0.3121	0.3333	0.6532	54.0914	83.8827	0.0773	2.1272	0.5764	1.5508	0.8976	0.484	0.729	0.5788	0.4219	0.5393	0.2275	0.312147	0.687853	172.997	368	99.7231	268.277	155.275	83.7349	1358	368	990	573	309	0.4701
2021	07.21	AS	25	600	45892	377	1475	1098	414	448	588	873	1178	0.2556	0.744	1.5464	2.912	0.4517	0.7295	0.2705	0.3097	0.6406	41.8351	59.3226	0.0697	1.9049	0.4869	1.418	0.7775	0.384	0.7444	0.5483	0.4081	0.4934	0.2014	0.270531	0.729469	197.911	377	96.3586	280.641	153.867	75.9112	1475	377	1098	602	297	0.525
2021	07.21	AS	25	600	30470	362	1330	968	412	455	643	928	1133	0.2722	0.728	0.6961	2.674	0.5847	0.7965	0.2035	0.4442	0.9676	31.5163	52.156	0.0525	2.2738	0.6189	1.6549	0.6873	0.337	0.7278	0.4153	0.3023	0.49	0.1481	0.203497	0.796503	159.205	362	98.5293	263.471	109.416	53.6195	1330	362	968	402	197	0.4398
2021	07.21	AS	25	600	39403	389	1399	1010	420	446	563	839	1146	0.2781	0.722	1.5082	2.596	0.4455	0.7495	0.2505	0.2574	0.5743	39.052	50.3337	0.0651	1.7853	0.4964	1.2889	0.7146	0.323	0.7219	0.5545	0.4003	0.4518	0.1808	0.250523	0.749477	217.891	389	108.164	280.836	155.711	70.3481	1399	389	1010	560	253	0.5601
2021	07.21	AS	25	500	33393	468	1460	992	506	541	683	956	1202	0.3205	0.679	0.844	2.12	0.4919	0.7399	0.2601	0.3528	0.7224	33.7008	49.4923	0.0674	2.1614	0.6928	1.4686	0.7461	0.382	0.6795	0.5081	0.3452	0.5119	0.1767	0.260096	0.739904	216.526	468	150.016	317.984	161.556	82.7014	1460	468	992	504	258	0.4627
2021	07.21	AS	25	400	36832	325	1388	1063	360	392	533	849	1121	0.2341	0.766	1.6228	3.271	0.4929	0.7488	0.2512	0.301	0.6522	34.6882	45.8978	0.0867	1.7277	0.4045	1.3232	0.6709	0.332	0.7659	0.5071	0.3883	0.4954	0.1924	0.251217	0.748783	188.111	325	76.0987	248.901	126.207	62.518	1388	325	1063	539	267	0.5788
2021	07.21	AS	26	600	39980	369	1548	1179	401	440	588	920	1266	0.2384	0.762	1.7446	3.195	0.4673	0.7608	0.2392	0.3308	0.6192	33.9488	44.9776	0.0566	1.7395	0.4147	1.3249	0.7057	0.317	0.7616	0.5327	0.4057	0.449	0.1822	0.239182	0.760818	212.13	369	87.9593	281.041	149.698	67.2209	1548	369	1179	628	282	0.5749
2021	07.21	AS	26	600	39166	369	1600	1231	400	429	558	909	1321	0.2306	0.769	2.346	3.336	0.4387	0.7734	0.2266	0.2356	0.5118	31.8556	37.1649	0.0531	1.5164	0.3497	1.1667	0.6549	0.264	0.7694	0.5613	0.4319	0.4038	0.1744	0.226653	0.773347	243.339	369	85.1006	283.899	159.362	64.3444	1600	369	1231	691	279	0.6595
2021	07.21	AS	26	800	73580	396	2220	1824	437	476	649	1070	1806	0.1784	0.822	4.3005	4.606	0.3695	0.773	0.227	0.2138	0.4624	40.3793	50.5241	0.0505	1.5229	0.2717	1.2512	0.7889	0.284	0.8216	0.6305	0.518	0.36	0.1865	0.22698	0.77302	260.03	396	70.6378	325.362	205.135	73.8486	2220	396	1824	1150	414	0.6566
2021	07.21	AS	26	290	27941	416	1317	901	448	480	601	858	1052	0.3159	0.684	0.9191	2.166	0.4906	0.7059	0.2941	0.3552	0.6844	31.0499	43.32	0.1071	2.0393	0.6442	1.3952	0.7107	0.41	0.6841	0.5094	0.3485	0.5773	0.2012	0.294077	0.705923	203.992	416	131.402	284.598	144.984	83.7054	1317	416	901	459	265	0.4904
2021	07.21	AS	26	600	36172	515	1595	1080	554	589	734	1040	1330	0.3229	0.677	0.8996	2.097	0.4861	0.7546	0.2454	0.3241	0.6759	33.5313	46.6245	0.0559	2.0535	0.6631	1.3905	0.7146	0.341	0.6771	0.5139	0.348	0.4775	0.1661	0.245387	0.754613	250.791	515	166.285	348.715	179.201	85.5643	1595	515	1080	555	265	0.487
2021	07.21	AS	26	500	30347	408	1453	1045	441	473	610	900	1182	0.2808	0.719	1.2607	2.561	0.4708	0.7407	0.2593	0.3062	0.6443	29.0793	39.7969	0.0582	1.9029	0.5343	1.3686	0.7242	0.355	0.7192	0.5292	0.3806	0.4901	0.1865	0.259361	0.740639	214.41	408	114.566	293.434	155.281	76.0964	1453	408	1045	553	271	0.5255
2021	07.21	AS	26	600	30227	399	1348	949	429	455	569	830	1125	0.296	0.704	1.2755	2.378	0.4542	0.765	0.235	0.274	0.5971	31.891	41.9294	0.0532	1.8676	0.5528	1.3148	0.7177	0.309	0.704	0.5458	0.3843	0.4305	0.1654	0.234967	0.765033	213.643	399	118.102	280.898	153.325	66.0067	1348	399	949	518	223	0.5355
2021	07.21	AS	26	600	34934	397	1489	1092	431	462	605	926	1216	0.2666	0.733	1.365	2.751	0.4844	0.75	0.25	0.2839	0.6349	32.0304	41.9807	0.0534	1.7871	0.4765	1.3106	0.6757	0.328	0.7334	0.5156	0.3781	0.4849	0.1833	0.250014	0.749986	222.148	397	105.849	291.151	150.108	72.7878	1489	397	1092	563	273	0.5596
2021	07.21	AS	26	600	48779	422	1590	1168	456	485	610	905	1301	0.2654	0.735	1.852	2.768	0.4135	0.7526	0.2474	0.2483	0.5365	41.8018	54.2356	0.0697	1.7662	0.4688	1.2974	0.7609	0.321	0.7346	0.5865	0.4308	0.4219	0.1818	0.247444	0.752556	238.931	422	112.002	309.998	181.805	76.7031	1590	422	1168	685	289	0.5662
2021	07.21	AS	27	600	46242	349	1932	1583	385	419	577	962	1590	0.1806	0.819	3.9528	4.536	0.3872	0.784	0.216	0.2148	0.4801	29.2509	36.2654	0.0488	1.5131	0.2733	1.2398	0.7597	0.268	0.8194	0.6128	0.5021	0.3526	0.177	0.216073	0.783927	230.652	349	63.044	285.956	175.223	61.7795	1932	349	1583	970	342	0.6609
2021	07.21	AS	27	500	43908	396	1744	1348	428	461	594	891	1366	0.2271	0.773	2.8338	3.404	0.3672	0.7196	0.2804	0.2448	0.4896	32.6119	43.4825	0.0652	1.725	0.3917	1.3333	0.8437	0.374	0.7729	0.6328	0.4891	0.4431	0.2167	0.280394	0.719606	229.565	396	89.9174	306.083	193.686	85.8303	1744	396	1348	853	378	0.5797
2021	07.21	AS	27	700	38842	412	1577	1165	442	472	591	864	1268	0.2613	0.739	2.0802	2.828	0.388	0.7348	0.2652	0.2575	0.5122	33.3799	44.0634	0.0477	1.7869	0.4668	1.3201	0.8079	0.35	0.7387	0.612	0.4521	0.4334	0.1959	0.265241	0.734759	230.567	412	107.637	304.363	186.275	80.728	1577	412	1165	713	309	0.5596
2021	07.21	AS	27	600	46307	359	2125	1766	409	452	650	1053	1791	0.1689	0.831	3.765	4.919	0.393	0.8109	0.1891	0.2435	0.5493	26.2608	36.7046	0.0438	1.6818	0.2841	1.3977	0.8484	0.264	0.8311	0.607	0.5045	0.3116	0.1572	0.189141	0.810859	213.462	359	60.6499	298.35	181.105	56.4264	2125	359	1766	1072	334	0.5946
2021	07.21	AS	27	500	49857	359	2253	1894	409	456	664	1106	1901	0.1593	0.841	4.1697	5.276	0.3944	0.8141	0.1859	0.2482	0.5368	26.3631	35.8802	0.0527	1.619	0.258	1.361	0.8242	0.253	0.8407	0.6056	0.5091	0.3069	0.1562	0.185859	0.814141	221.742	359	57.2042	301.796	182.767	56.0888	2253	359	1894	1147	352	0.6177
2021	07.21	AS	27	600	47227	358	1867	1509	401	443	628	1021	1547	0.1918	0.808	2.6687	4.215	0.4394	0.7879	0.2121	0.2783	0.5964	31.3358	42.5373	0.0522	1.6795	0.322	1.3575	0.761	0.288	0.8082	0.5606	0.4531	0.3783	0.1714	0.212075	0.787925	213.159	358	68.647	289.353	162.222	61.3605	1867	358	1509	846	320	0.5954
2021	07.21	AS	27	290	37802	320	1836	1516	359	392	556	937	1520	0.1743	0.826	3.7253	4.737	0.407	0.7916	0.2084	0.2177	0.5189	24.9749	31.8427	0.0861	1.5441	0.2691	1.275	0.7561	0.266	0.8257	0.593	0.4897	0.3515	0.1721	0.208439	0.791561	207.24	320	55.7734	264.227	156.689	55.0763	1836	320	1516	899	316	0.6476
2021	07.21	AS	27	600	51778	364	1940	1576	410	450	640	1045	1581	0.1876	0.812	2.8514	4.33	0.4321	0.7722	0.2278	0.2538	0.5838	32.8929	44.4368	0.0548	1.663	0.312	1.351	0.7672	0.308	0.8124	0.5679	0.4613	0.4011	0.1851	0.227785	0.772215	218.882	364	68.2969	295.703	167.928	67.3588	1940	364	1576	895	359	0.6013
2021	07.21	AS	27	400	44948	372	2237	1865	439	497	762	1188	1916	0.1663	0.834	2.8106	5.013	0.4375	0.8279	0.1721	0.311	0.6971	24.1398	38.458	0.0603	1.9109	0.3178	1.5931	0.8961	0.274	0.8337	0.5625	0.4689	0.306	0.1435	0.172125	0.827875	194.673	372	61.8614	310.139	174.443	53.3804	2237	372	1865	1049	321	0.5233
2021	07.21	AS	28	500	16386	501	1804	1303	541	577	733	1058	1553	0.2777	0.722	1.5101	2.601	0.4275	0.8074	0.1926	0.2763	0.5935	12.6146	17.5141	0.0252	1.9222	0.5338	1.3884	0.7949	0.267	0.7223	0.5725	0.4135	0.3365	0.1391	0.192646	0.807354	260.639	501	139.136	361.864	207.176	69.7068	1804	501	1303	746	251	0.5202
2021	07.21	AS	28	600	45023	403	2200	1797	450	489	674	1090	1866	0.1832	0.817	3.7296	4.459	0.3823	0.8141	0.1859	0.217	0.5027	25.094	32.996	0.0418	1.6098	0.2949	1.3149	0.8122	0.244	0.8168	0.6177	0.5045	0.3009	0.1518	0.185866	0.814134	250.342	403	73.8223	329.178	203.332	61.1827	2200	403	1797	1110	334	0.6212
2021	07.21	AS	28	300	28901	349	1543	1194	397	439	635	967	1338	0.2262	0.774	1.3329	3.421	0.5176	0.8283	0.1717	0.3518	0.7984	24.2437	37.3987	0.0808	1.9935	0.4509	1.5426	0.7442	0.265	0.7738	0.4824	0.3733	0.3559	0.1329	0.171686	0.828314	175.069	349	78.9378	270.062	130.281	46.3675	1543	349	1194	576	205	0.5016
2021	07.21	AS	28	600	50681	421	2038	1617	460	497	667	1072	1675	0.2066	0.793	2.9917	3.841	0.4026	0.7755	0.2245	0.2288	0.5071	31.3816	39.5283	0.0523	1.5875	0.3279	1.2596	0.7525	0.283	0.7934	0.5974	0.474	0.3758	0.1781	0.224503	0.775497	265.197	421	86.9681	334.032	199.552	74.9868	2038	421	1617	966	363	0.6299
2021	07.21	AS	28	600	45916	425	1763	1338	455	485	614	967	1413	0.2411	0.759	2.5157	3.148	0.4051	0.7384	0.2616	0.2242	0.4709	34.3561	39.9342	0.0573	1.5316	0.3692	1.1624	0.6915	0.304	0.7589	0.5949	0.4515	0.4397	0.1985	0.261578	0.738422	277.488	425	102.453	322.547	191.889	84.3732	1763	425	1338	796	350	0.6529
2021	07.21	AS	28	600	46719	423	2075	1652	469	509	700	1117	1736	0.2039	0.796	2.6884	3.905	0.4201	0.7948	0.2052	0.2421	0.5589	28.3197	37.678	0.0472	1.6711	0.3407	1.3305	0.7715	0.273	0.7961	0.5799	0.4617	0.3539	0.1634	0.205227	0.794773	253.127	423	86.2308	336.769	195.293	69.107	2075	423	1652	958	339	0.5984
2021	07.21	AS	28	700	39814	495	1630	1135	527	558	702	981	1266	0.3037	0.696	1.2514	2.293	0.4282	0.6793	0.3207	0.2731	0.6079	35.1177	49.8585	0.0502	2.0389	0.6192	1.4198	0.8118	0.455	0.6963	0.5718	0.3982	0.5609	0.2233	0.320723	0.679277	242.778	495	150.322	344.678	197.089	110.54	1630	495	1135	649	364	0.4905
2021	07.21	AS	28	600	38410	404	1598	1194	445	480	653	993	1322	0.2528	0.747	1.3414	2.955	0.4933	0.7688	0.2312	0.2931	0.6951	32.2078	45.3862	0.0537	1.886	0.4768	1.4092	0.714	0.326	0.7472	0.5067	0.3786	0.4562	0.1727	0.231157	0.768843	214.21	404	102.138	301.862	152.954	69.7772	1598	404	1194	605	276	0.5302
2021	07.21	AS	28	600	56484	527	1828	1301	578	624	832	1158	1482	0.2883	0.712	0.9649	2.469	0.485	0.7341	0.2659	0.3536	0.7815	43.4544	70.0137	0.0724	2.2639	0.6527	1.6112	0.8297	0.428	0.7117	0.515	0.3665	0.5164	0.1893	0.265946	0.734054	232.784	527	151.93	375.07	193.156	99.7495	1828	527	1301	670	346	0.4417
2021	07.21	AS	29	700	50655	397	1922	1525	437	471	642	1017	1612	0.2066	0.793	2.8146	3.841	0.4066	0.7967	0.2033	0.223	0.5355	33.2553	43.8041	0.0475	1.6601	0.3429	1.3172	0.7817	0.268	0.7934	0.5934	0.4709	0.3425	0.1613	0.20324	0.79676	239.142	397	82.0026	314.997	186.933	64.0323	1922	397	1525	905	310	0.6024
2021	07.21	AS	29	600	36157	369	1482	1113	406	440	584	899	1224	0.249	0.751	1.5356	3.016	0.4762	0.7682	0.2318	0.3055	0.6439	32.5247	43.98	0.0542	1.8005	0.4483	1.3522	0.7083	0.313	0.751	0.5238	0.3934	0.4425	0.1741	0.231782	0.768218	204.943	369	91.8765	277.123	145.16	64.2389	1482	369	1113	583	258	0.5554
2021	07.21	AS	29	600	38586	369	1520	1151	406	440	577	883	1240	0.2428	0.757	1.8084	3.119	0.4466	0.7567	0.2433	0.2954	0.6024	33.5627	45.2726	0.0559	1.7813	0.4324	1.3489	0.7465	0.328	0.7572	0.5534	0.4191	0.4396	0.1842	0.243275	0.756725	207.152	369	89.5796	279.42	154.64	67.9737	1520	369	1151	637	280	0.5614
2021	07.21	AS	29	300	25869	377	1392	1015	407	433	542	783	1117	0.2708	0.729	1.8114	2.692	0.4	0.7291	0.2709	0.2562	0.5419	25.5257	34.5792	0.0851	1.8578	0.5032	1.3547	0.8128	0.367	0.7292	0.6	0.4375	0.4516	0.1976	0.27096	0.72904	202.928	377	102.104	274.896	164.938	74.4792	1392	377	1015	609	275	0.5383
2021	07.21	AS	29	600	44685	515	1823	1308	547	574	705	1048	1484	0.2825	0.717	1.8583	2.54	0.4075	0.7408	0.2592	0.2064	0.4842	34.2021	40.6404	0.057	1.6561	0.4678	1.1882	0.704	0.308	0.7175	0.5925	0.4251	0.4374	0.186	0.25916	0.740841	310.972	515	145.488	369.512	218.939	95.768	1823	515	1308	775	339	0.6038
2021	07.21	AS	29	700	35737	478	1566	1088	517	550	703	1004	1284	0.3052	0.695	0.9875	2.276	0.4835	0.7408	0.2592	0.3033	0.6893	32.8855	46.8899	0.047	2.0523	0.6264	1.4259	0.7365	0.37	0.6948	0.5165	0.3589	0.5018	0.1801	0.25918	0.74082	232.909	478	145.903	332.097	171.543	86.0766	1566	478	1088	562	282	0.4873
2021	07.21	AS	29	400	30404	528	1522	994	555	584	687	921	1205	0.3469	0.653	1.1618	1.883	0.3954	0.6811	0.3189	0.2918	0.5332	30.6265	41.303	0.0766	2.065	0.7164	1.3486	0.8154	0.43	0.6531	0.6046	0.3949	0.5275	0.2083	0.318927	0.681073	255.69	528	183.169	344.83	208.494	109.971	1522	528	994	601	317	0.4843
2021	07.21	AS	29	500	34203	414	1461	1047	442	470	592	870	1199	0.2834	0.717	1.5044	2.529	0.4355	0.7498	0.2502	0.2674	0.5667	32.7066	42.5569	0.0654	1.8157	0.5145	1.3012	0.7345	0.326	0.7166	0.5645	0.4045	0.4433	0.1793	0.250243	0.749757	228.011	414	117.314	296.686	167.47	74.2423	1461	414	1047	591	262	0.5508
2021	07.21	AS	29	600	37711	350	1422	1072	383	403	545	876	1150	0.2461	0.754	1.6163	3.063	0.4907	0.7463	0.2537	0.1866	0.6063	35.217	43.5191	0.0587	1.6392	0.4035	1.2357	0.6294	0.314	0.7539	0.5093	0.384	0.4982	0.1913	0.253733	0.746267	213.519	350	86.1463	263.854	134.388	66.948	1422	350	1072	546	272	0.6101
2021	07.21	AS	30	600	44390	329	1552	1223	359	386	510	830	1220	0.212	0.788	2.9212	3.717	0.4096	0.7285	0.2715	0.2208	0.4933	36.3353	43.7571	0.0606	1.5282	0.324	1.2043	0.7109	0.327	0.788	0.5904	0.4652	0.4598	0.2139	0.271466	0.728534	215.286	329	69.7429	259.257	153.053	70.3789	1552	329	1223	722	332	0.6544
2021	07.21	AS	30	700	45513	392	1653	1261	422	452	576	901	1320	0.2371	0.763	2.5073	3.217	0.4036	0.7359	0.2641	0.2379	0.4864	36.1318	43.538	0.0516	1.5796	0.3746	1.205	0.7186	0.318	0.7629	0.5964	0.4549	0.4428	0.2015	0.264086	0.735914	248.164	392	92.9607	299.039	178.333	78.9691	1653	392	1261	752	333	0.6331
2021	07.21	AS	30	700	57317	382	2007	1625	419	450	590	954	1639	0.1903	0.81	4.3591	4.254	0.352	0.7735	0.2265	0.1908	0.4267	35.3115	42.8018	0.0504	1.4971	0.2849	1.2121	0.7855	0.274	0.8097	0.648	0.5247	0.3495	0.1834	0.226476	0.773524	255.16	382	72.7075	309.293	200.422	70.0429	2007	382	1625	1053	368	0.668
2021	07.21	AS	30	600	55795	399	1954	1555	431	461	603	991	1567	0.2042	0.796	3.6602	3.897	0.3807	0.7511	0.2489	0.1929	0.4373	35.9203	41.2598	0.0599	1.4434	0.2947	1.1486	0.7113	0.286	0.7958	0.6193	0.4928	0.4019	0.1981	0.248897	0.751103	276.431	399	81.4744	317.526	196.641	79.0241	1954	399	1555	963	387	0.6928
2021	07.21	AS	30	700	43212	436	1746	1310	469	499	626	919	1413	0.2497	0.75	2.453	3.005	0.3687	0.7458	0.2542	0.229	0.4835	33.0253	43.3043	0.0472	1.7477	0.4364	1.3112	0.8278	0.333	0.7503	0.6313	0.4737	0.4027	0.1907	0.254225	0.745775	249.471	436	108.875	327.125	206.513	83.1546	1746	436	1310	827	333	0.5722
2021	07.21	AS	30	500	40174	377	1530	1153	407	436	557	859	1197	0.2464	0.754	2.1479	3.058	0.418	0.7112	0.2888	0.2515	0.5204	34.8826	43.4223	0.0698	1.6518	0.407	1.2448	0.7244	0.36	0.7536	0.582	0.4386	0.4963	0.2176	0.288847	0.711153	228.236	377	92.8948	284.105	165.338	82.0529	1530	377	1153	671	333	0.6054
2021	07.21	AS	30	500	39814	412	1666	1254	441	467	584	918	1350	0.2473	0.753	2.4908	3.044	0.4035	0.748	0.252	0.2073	0.4572	31.7889	36.019	0.0636	1.5053	0.3723	1.1331	0.6759	0.286	0.7527	0.5965	0.449	0.4225	0.1897	0.252021	0.747979	273.7	412	101.887	310.113	184.98	78.1465	1666	412	1254	748	316	0.6643
2021	07.21	AS	30	400	32502	349	1488	1139	385	421	574	871	1216	0.2345	0.765	1.7126	3.264	0.4583	0.7612	0.2388	0.3161	0.6585	28.5747	41.0556	0.0714	1.877	0.4402	1.4368	0.7783	0.343	0.7655	0.5417	0.4147	0.4408	0.1828	0.238781	0.761219	185.935	349	81.8555	267.144	144.713	63.7957	1488	349	1139	617	272	0.5328
2021	07.21	AS	30	300	33617	358	1435	1077	387	412	521	774	1083	0.2495	0.751	2.289	3.008	0.3863	0.6732	0.3268	0.2321	0.5045	31.2525	40.8186	0.1042	1.7402	0.4342	1.3061	0.8016	0.427	0.7505	0.6137	0.4606	0.5325	0.2453	0.326795	0.673205	205.723	358	89.3129	268.687	164.905	87.816	1435	358	1077	661	352	0.5746
2021	07.21	AS	31	600	31715	555	1870	1315	622	686	930	1346	1582	0.2968	0.703	0.582	2.369	0.6015	0.781	0.219	0.4867	0.9506	24.1563	38.1736	0.0403	2.2472	0.667	1.5803	0.6297	0.346	0.7032	0.3985	0.2802	0.5496	0.154	0.219016	0.780984	246.974	555	164.719	390.281	155.519	85.4759	1870	555	1315	524	288	0.445
2021	07.21	AS	31	700	60183	413	2007	1594	445	473	601	958	1602	0.2058	0.794	4.276	3.86	0.3419	0.7459	0.2541	0.1757	0.3931	37.7956	43.4592	0.054	1.4478	0.2979	1.1498	0.7567	0.292	0.7942	0.6581	0.5227	0.3861	0.2018	0.254092	0.745908	285.26	413	84.987	328.013	215.863	83.3408	2007	413	1594	1049	405	0.6907
2021	07.21	AS	31	500	33289	457	1497	1040	498	539	690	913	1152	0.3053	0.695	0.9907	2.276	0.4385	0.6683	0.3317	0.3942	0.7468	32.0471	54.5832	0.0641	2.4516	0.7484	1.7032	0.9564	0.565	0.6947	0.5615	0.3901	0.5908	0.2305	0.331734	0.668266	186.409	457	139.512	317.488	178.282	105.321	1497	457	1040	584	345	0.4079
2021	07.21	AS	31	700	51843	383	1764	1381	418	451	603	948	1314	0.2171	0.783	2.6176	3.606	0.4091	0.6741	0.3259	0.239	0.531	37.5794	48.7757	0.0537	1.6579	0.36	1.2979	0.7669	0.423	0.7829	0.5909	0.4626	0.5515	0.2551	0.325881	0.674119	231.015	383	83.157	299.843	177.17	97.7041	1764	383	1381	816	450	0.6032
2021	07.21	AS	31	400	45258	362	1771	1409	398	430	583	946	1401	0.2044	0.796	2.89	3.892	0.4145	0.7374	0.2626	0.2271	0.5228	32.1599	40.567	0.0804	1.5855	0.3241	1.2614	0.7386	0.331	0.7956	0.5855	0.4658	0.4485	0.2089	0.262597	0.737403	228.319	362	73.9944	288.006	168.633	75.6296	1771	362	1409	825	370	0.6307
2021	07.21	AS	31	500	44160	345	1746	1401	374	399	523	898	1402	0.1976	0.802	3.8809	4.061	0.3947	0.7545	0.2455	0.1784	0.4235	31.5596	33.8614	0.0631	1.3371	0.2642	1.0729	0.6494	0.263	0.8024	0.6053	0.4857	0.4057	0.197	0.24557	0.75443	258.021	345	68.1701	276.83	167.56	67.9725	1746	345	1401	848	344	0.7479
2021	07.21	AS	31	700	53298	453	1660	1207	477	501	591	844	1298	0.2729	0.727	2.8639	2.664	0.3239	0.7001	0.2999	0.1988	0.3811	44.1965	51.9959	0.0631	1.618	0.4415	1.1765	0.7954	0.353	0.7271	0.6761	0.4916	0.4436	0.2181	0.299918	0.700082	279.975	453	123.62	329.38	222.679	98.7867	1660	453	1207	816	362	0.618
2021	07.21	AS	31	600	50773	387	1802	1415	420	450	598	971	1459	0.2148	0.785	2.8269	3.656	0.4127	0.7576	0.2424	0.212	0.4971	35.9216	43.2617	0.0599	1.5337	0.3294	1.2043	0.7073	0.292	0.7852	0.5873	0.4612	0.4128	0.1903	0.242437	0.757563	252.331	387	83.1127	303.887	178.467	73.6632	1802	387	1415	831	343	0.652
2021	07.21	AS	31	700	51980	390	1721	1331	426	457	600	916	1336	0.2266	0.773	2.5295	3.413	0.3952	0.7107	0.2893	0.2329	0.5259	39.0926	52.0244	0.0558	1.7207	0.3899	1.3308	0.8049	0.385	0.7734	0.6048	0.4678	0.4783	0.2237	0.289276	0.710724	226.652	390	88.3788	301.621	182.423	87.2458	1721	390	1331	805	385	0.5811
2021	07.21	AS	32	600	46133	369	1846	1477	411	451	635	1013	1536	0.1999	0.8	2.5073	4.003	0.436	0.7901	0.2099	0.2708	0.6003	31.2737	43.0579	0.0521	1.7208	0.344	1.3768	0.7765	0.289	0.8001	0.564	0.4512	0.3721	0.1679	0.209864	0.790136	214.435	369	73.76	295.24	166.51	61.9664	1846	369	1477	833	310	0.5811
2021	07.21	AS	32	600	43035	362	1583	1221	396	429	578	915	1301	0.2287	0.771	2.0114	3.373	0.4529	0.769	0.231	0.2703	0.5897	35.2851	45.9408	0.0588	1.688	0.386	1.302	0.7123	0.301	0.7713	0.5471	0.422	0.4222	0.1781	0.230986	0.769014	214.455	362	82.7821	279.218	152.758	64.4877	1583	362	1221	668	282	0.5924
2021	07.21	AS	32	600	41268	346	1571	1225	388	426	607	951	1313	0.2202	0.78	1.6395	3.54	0.4939	0.7894	0.2106	0.3102	0.7102	33.7269	48.4998	0.0562	1.8442	0.4062	1.438	0.7278	0.303	0.7798	0.5061	0.3947	0.4161	0.1642	0.210588	0.789412	187.615	346	76.2037	269.796	136.55	56.8224	1571	346	1225	620	258	0.5422
2021	07.21	AS	32	600	41330	325	1655	1330	370	408	600	972	1360	0.1964	0.804	2.042	4.092	0.4865	0.7782	0.2218	0.2857	0.6892	31.1139	44.0821	0.0519	1.763	0.3462	1.4168	0.7276	0.314	0.8036	0.5135	0.4127	0.4319	0.1782	0.221781	0.778219	184.345	325	63.8218	261.178	134.124	57.9305	1655	325	1330	683	295	0.5672
2021	07.21	AS	32	290	29524	869	1773	904	899	927	1037	1271	1539	0.4901	0.51	0.3962	1.04	0.4447	0.7412	0.2588	0.3097	0.6195	32.6989	45.5508	0.1128	2.7321	1.3391	1.393	0.7736	0.361	0.5099	0.5553	0.2831	0.4661	0.132	0.258825	0.741175	318.07	869	425.923	443.077	246.045	114.69	1773	869	904	502	234	0.366
2021	07.21	AS	32	600	40564	315	1627	1312	362	403	595	964	1377	0.1936	0.806	1.9882	4.165	0.4947	0.8095	0.1905	0.3125	0.7114	30.9563	44.5186	0.0516	1.7834	0.3453	1.4381	0.7267	0.274	0.8064	0.5053	0.4075	0.3771	0.1537	0.190549	0.809451	176.629	315	60.9865	254.013	128.362	48.402	1627	315	1312	663	250	0.5607
2021	07.21	AS	32	600	43632	315	1680	1365	360	399	592	986	1428	0.1875	0.813	2.2053	4.333	0.4916	0.8154	0.1846	0.2857	0.6764	32.004	44.0392	0.0533	1.6936	0.3176	1.3761	0.6996	0.254	0.8125	0.5084	0.4131	0.3631	0.15	0.1846	0.8154	185.994	315	59.0625	255.938	130.125	47.25	1680	315	1365	694	252	0.5905
2021	07.21	AS	32	700	62384	336	2016	1680	372	405	559	971	1647	0.1667	0.833	4.8814	5	0.378	0.7804	0.2196	0.1964	0.4425	37.1729	43.5147	0.0531	1.4047	0.2341	1.1706	0.7281	0.257	0.8333	0.622	0.5184	0.3531	0.183	0.219628	0.780372	239.197	336	56	280	174.167	61.5	2016	336	1680	1045	369	0.7119
2021	07.21	AS	32	700	47474	305	1640	1335	342	371	530	904	1334	0.186	0.814	2.9138	4.377	0.4487	0.7708	0.2292	0.2172	0.5618	35.6003	44.5747	0.0509	1.5381	0.2861	1.2521	0.6903	0.287	0.814	0.5513	0.4488	0.4158	0.1866	0.229231	0.770769	198.297	305	56.7226	248.277	136.878	56.9085	1640	305	1335	736	306	0.6501
2021	08.21	SS	1	800	75101	320	1917	1597	351	377	518	1004	1554	0.1669	0.833	4.7927	4.991	0.4283	0.7727	0.2273	0.1628	0.4133	47.066	45.4145	0.0588	1.1583	0.1933	0.9649	0.5516	0.219	0.8331	0.5717	0.4763	0.3976	0.1894	0.227308	0.772692	276.267	320	53.4168	266.583	152.405	60.5947	1917	320	1597	913	363	0.8634
2021	08.21	SS	1	700	71577	335	1781	1446	361	389	517	959	1421	0.1881	0.812	3.957	4.316	0.4315	0.751	0.249	0.1936	0.4195	49.5397	48.1636	0.0708	1.1975	0.2252	0.9722	0.5527	0.242	0.8119	0.5685	0.4615	0.438	0.2021	0.249003	0.750997	279.749	335	63.0124	271.988	154.615	67.7148	1781	335	1446	822	360	0.8351
2021	08.21	SS	1	700	62984	329	1743	1414	357	380	501	934	1417	0.1888	0.811	4.0998	4.298	0.4279	0.7694	0.2306	0.1627	0.4055	44.5828	42.2493	0.0637	1.1682	0.2205	0.9477	0.5422	0.218	0.8112	0.5721	0.4641	0.403	0.187	0.230556	0.769444	281.63	329	62.1004	266.9	152.703	61.5341	1743	329	1414	809	326	0.8561
2021	08.21	SS	1	900	66458	324	1779	1455	351	375	498	975	1468	0.1821	0.818	4.2428	4.491	0.4474	0.7863	0.2137	0.1649	0.3986	45.715	40.7292	0.0508	1.0893	0.1984	0.8909	0.4923	0.19	0.8179	0.5526	0.4519	0.3868	0.1748	0.213746	0.786254	297.439	324	59.0084	264.992	146.428	56.6408	1779	324	1455	804	311	0.918
2021	08.21	SS	1	900	68306	337	1733	1396	369	397	540	998	1449	0.1945	0.806	3.0205	4.142	0.4735	0.7966	0.2034	0.2006	0.4847	48.9694	50.13	0.0544	1.2708	0.2471	1.0237	0.539	0.208	0.8055	0.5265	0.4241	0.3864	0.1639	0.20344	0.79656	265.187	337	65.5332	271.467	142.928	55.2268	1733	337	1396	735	284	0.7869
2021	08.21	SS	1	900	65042	354	1768	1414	387	415	553	1020	1473	0.2002	0.8	3.0019	3.994	0.471	0.7914	0.2086	0.198	0.4691	46.038	45.8537	0.0512	1.2453	0.2494	0.996	0.5269	0.208	0.7998	0.529	0.4231	0.3944	0.1669	0.208638	0.791362	284.269	354	70.8801	283.12	149.769	59.0667	1768	354	1414	748	295	0.803
2021	08.21	SS	1	800	69956	323	1939	1616	358	388	559	1082	1610	0.1666	0.833	3.7854	5.003	0.4697	0.7964	0.2036	0.1856	0.4868	43.3286	44.908	0.0542	1.2436	0.2072	1.0365	0.5497	0.211	0.8334	0.5303	0.442	0.3839	0.1697	0.203582	0.796418	259.73	323	53.8056	269.194	142.76	54.8051	1939	323	1616	857	329	0.8041
2021	08.21	SS	1	900	83055	323	2056	1733	360	389	557	1113	1688	0.1571	0.843	4.5562	5.365	0.4559	0.7877	0.2123	0.1673	0.4501	47.9648	47.3576	0.0533	1.1714	0.184	0.9873	0.5373	0.21	0.8429	0.5441	0.4587	0.3902	0.179	0.212308	0.787692	275.738	323	50.7437	272.256	148.146	57.8132	2056	323	1733	943	368	0.8537
2021	08.21	SS	1	800	60412	298	1740	1442	329	356	499	977	1448	0.1713	0.829	3.8057	4.839	0.4709	0.7975	0.2025	0.1872	0.4646	41.9339	41.3781	0.0524	1.1907	0.2039	0.9867	0.5221	0.2	0.8287	0.5291	0.4385	0.3827	0.1678	0.202487	0.797513	250.273	298	51.0368	246.963	130.675	50.0092	1740	298	1442	763	292	0.8399
2021	08.21	SS	2	700	58922	300	1751	1451	336	366	525	1025	1463	0.1713	0.829	3.2331	4.837	0.4997	0.8015	0.1985	0.2068	0.5169	40.6472	42.0488	0.0581	1.2484	0.2139	1.0345	0.5176	0.205	0.8287	0.5003	0.4146	0.3967	0.1645	0.198469	0.801531	240.308	300	51.3992	248.601	124.386	49.3432	1751	300	1451	726	288	0.801
2021	08.21	SS	2	700	57245	340	1769	1429	379	414	604	1079	1477	0.1922	0.808	2.2184	4.203	0.5171	0.7957	0.2043	0.2449	0.6158	40.0985	47.7492	0.0573	1.4741	0.2833	1.1908	0.575	0.243	0.8078	0.4829	0.3901	0.4232	0.1651	0.204363	0.795637	230.649	340	65.3477	274.652	132.617	56.1221	1769	340	1429	690	292	0.6784
2021	08.21	SS	2	700	57250	325	1803	1478	360	392	554	1026	1494	0.1803	0.82	3.1622	4.548	0.4743	0.7909	0.2091	0.2165	0.5165	38.7743	42.2221	0.0554	1.3284	0.2394	1.0889	0.5725	0.228	0.8197	0.5257	0.4309	0.3977	0.1714	0.209071	0.790929	244.655	325	58.5829	266.417	140.058	55.6988	1803	325	1478	777	309	0.7528
2021	08.21	SS	2	800	66590	329	2058	1729	379	421	643	1192	1731	0.1599	0.84	3.0442	5.255	0.4991	0.8109	0.1891	0.2429	0.6054	38.5526	46.7575	0.0482	1.4436	0.2308	1.2128	0.6075	0.229	0.8401	0.5009	0.4208	0.3776	0.1589	0.18914	0.81086	227.902	329	52.5952	276.405	138.442	52.2755	2058	329	1729	866	327	0.6927
2021	08.21	SS	2	800	61038	325	1713	1388	359	391	550	1035	1449	0.1897	0.81	2.6069	4.271	0.5115	0.8098	0.1902	0.2305	0.5403	44.0151	46.4948	0.055	1.3037	0.2473	1.0563	0.516	0.201	0.8103	0.4885	0.3958	0.3894	0.1541	0.190222	0.809778	249.29	325	61.6608	263.339	128.634	50.0876	1713	325	1388	678	264	0.7671
2021	08.21	SS	2	800	47882	320	1665	1345	362	401	594	1045	1425	0.1922	0.808	1.9207	4.203	0.539	0.8216	0.1784	0.29	0.6791	35.6393	44.8973	0.0445	1.5595	0.2997	1.2598	0.5807	0.225	0.8078	0.461	0.3724	0.3871	0.1441	0.178453	0.821547	205.194	320	61.5015	258.498	119.159	46.1261	1665	320	1345	620	240	0.6412
2021	08.21	SS	2	900	51652	303	1532	1229	338	365	526	973	1317	0.1978	0.802	2.0392	4.056	0.5452	0.8251	0.1749	0.2197	0.6048	42.0672	46.6716	0.0467	1.383	0.2735	1.1095	0.5046	0.194	0.8022	0.4548	0.3649	0.3846	0.1403	0.174916	0.825084	219.089	303	59.9275	243.072	110.559	42.5228	1532	303	1229	559	215	0.7231
2021	08.21	SS	2	800	64917	334	1827	1493	373	410	589	1103	1556	0.1828	0.817	2.5928	4.47	0.5151	0.8185	0.1815	0.2478	0.5693	43.5203	48.1044	0.0544	1.3526	0.2473	1.1053	0.536	0.201	0.8172	0.4849	0.3963	0.3743	0.1483	0.181498	0.818502	246.932	334	61.0597	272.94	132.357	49.5424	1827	334	1493	724	271	0.7393
2021	08.21	SS	2	800	49148	329	1690	1361	370	401	581	1059	1470	0.1947	0.805	2.0855	4.137	0.5364	0.8384	0.1616	0.2278	0.6172	36.1511	41.5985	0.0452	1.4288	0.2782	1.1507	0.5335	0.186	0.8053	0.4636	0.3734	0.3487	0.1302	0.161657	0.838343	230.263	329	64.0479	264.952	122.84	42.8284	1690	329	1361	631	220	0.6999
2021	08.21	SS	3	800	70626	369	2323	1954	423	472	712	1326	1957	0.1588	0.841	3.2368	5.295	0.4898	0.8127	0.1873	0.2508	0.5851	36.1833	43.2284	0.0452	1.4203	0.2256	1.1947	0.6096	0.224	0.8412	0.5102	0.4292	0.3671	0.1576	0.187294	0.812706	259.804	369	58.6143	310.386	158.37	58.1378	2323	369	1954	997	366	0.7041
2021	08.21	SS	3	800	67620	350	1853	1503	386	416	576	1066	1532	0.1889	0.811	3.0324	4.294	0.4764	0.7864	0.2136	0.1996	0.5012	45.0291	47.377	0.0563	1.2972	0.245	1.0521	0.5509	0.225	0.8111	0.5236	0.4247	0.4079	0.1732	0.213576	0.786424	269.812	350	66.109	283.891	148.651	60.6314	1853	350	1503	787	321	0.7709
2021	08.21	SS	3	800	83385	342	2174	1832	376	407	570	1137	1770	0.1573	0.843	5.1327	5.357	0.434	0.7795	0.2205	0.1692	0.4148	45.5552	43.5496	0.0569	1.1344	0.1785	0.956	0.5411	0.211	0.8427	0.566	0.477	0.3896	0.1858	0.220514	0.779486	301.481	342	53.8013	288.199	163.134	63.5547	2174	342	1832	1037	404	0.8815
2021	08.21	SS	3	800	67821	356	1979	1623	390	421	579	1082	1618	0.1799	0.82	3.7598	4.559	0.4473	0.7776	0.2224	0.191	0.458	41.8266	42.8252	0.0523	1.2485	0.2246	1.0239	0.5659	0.228	0.8201	0.5527	0.4533	0.4025	0.1824	0.222462	0.777538	285.142	356	64.0404	291.96	161.36	64.9399	1979	356	1623	897	361	0.801
2021	08.21	SS	3	900	79175	349	2017	1668	382	410	558	1077	1633	0.173	0.827	4.4441	4.779	0.4365	0.7698	0.2302	0.1679	0.4177	47.5066	45.4619	0.0528	1.1572	0.2002	0.957	0.5393	0.22	0.827	0.5635	0.466	0.4085	0.1904	0.23019	0.76981	301.59	349	60.3872	288.613	162.648	66.4432	2017	349	1668	940	384	0.8642
2021	08.21	SS	3	800	70713	368	2142	1774	412	450	647	1203	1767	0.1718	0.828	3.3592	4.821	0.4707	0.7886	0.2114	0.2142	0.5242	39.8999	44.4394	0.0499	1.3448	0.231	1.1138	0.5895	0.235	0.8282	0.5293	0.4384	0.3994	0.1751	0.211402	0.788598	273.647	368	63.2232	304.777	161.322	64.4258	2142	368	1774	939	375	0.7436
2021	08.21	SS	3	800	68133	348	2066	1718	386	420	596	1132	1708	0.1684	0.832	3.8652	4.937	0.4563	0.7916	0.2084	0.1979	0.4812	39.6977	41.8581	0.0496	1.268	0.2136	1.0544	0.5732	0.22	0.8316	0.5437	0.4521	0.3833	0.1733	0.2084	0.7916	274.448	348	58.6176	289.382	157.324	60.302	2066	348	1718	934	358	0.7886
2021	08.21	SS	3	700	47874	327	1718	1391	366	400	574	1031	1461	0.1903	0.81	2.3949	4.254	0.5061	0.8152	0.1848	0.2444	0.5919	34.4561	40.2967	0.0492	1.4444	0.2749	1.1695	0.5776	0.216	0.8097	0.4939	0.3999	0.3741	0.1496	0.184768	0.815232	226.392	327	62.2404	264.76	130.762	48.9168	1718	327	1391	687	257	0.6923
2021	08.21	SS	3	800	65304	352	2076	1724	392	429	614	1148	1726	0.1696	0.83	3.6016	4.898	0.4617	0.797	0.203	0.2146	0.5066	37.9189	41.6028	0.0474	1.3212	0.224	1.0972	0.5906	0.223	0.8304	0.5383	0.447	0.3772	0.1686	0.203047	0.796953	266.424	352	59.684	292.316	157.349	59.3449	2076	352	1724	928	350	0.7569
2021	08.21	SS	4	700	68031	352	2088	1736	401	443	653	1183	1730	0.1686	0.831	3.0821	4.932	0.4787	0.7938	0.2062	0.2419	0.578	39.2277	47.3628	0.056	1.4522	0.2448	1.2074	0.6294	0.249	0.8314	0.5213	0.4334	0.3956	0.1715	0.206226	0.793774	242.391	352	59.341	292.659	152.567	60.3525	2088	352	1736	905	358	0.6886
2021	08.21	SS	4	800	85305	349	2354	2005	393	435	641	1260	1925	0.1483	0.852	4.5832	5.745	0.4544	0.786	0.214	0.2095	0.4855	42.5857	45.4996	0.0532	1.2544	0.186	1.0684	0.583	0.229	0.8517	0.5456	0.4647	0.3921	0.1822	0.21393	0.78607	278.221	349	51.7421	297.258	162.195	63.6028	2354	349	2005	1094	429	0.7972
2021	08.21	SS	4	600	48738	330	2006	1676	381	425	655	1189	1717	0.1645	0.835	2.6667	5.079	0.5125	0.8276	0.1724	0.2625	0.6464	29.1193	36.724	0.0485	1.5095	0.2483	1.2612	0.6148	0.217	0.8355	0.4875	0.4073	0.3537	0.1441	0.172429	0.827571	218.615	330	54.2871	275.713	134.402	47.5424	2006	330	1676	817	289	0.6625
2021	08.21	SS	4	800	65355	357	1920	1563	397	427	590	1074	1577	0.1859	0.814	3.2352	4.378	0.4587	0.7806	0.2194	0.1919	0.4969	41.8535	45.3364	0.0523	1.3306	0.2474	1.0832	0.5863	0.238	0.8141	0.5413	0.4406	0.4054	0.1786	0.219443	0.780557	268.3	357	66.3797	290.62	157.303	63.7766	1920	357	1563	846	343	0.7515
2021	08.21	SS	4	800	69927	356	2058	1702	396	429	607	1149	1692	0.173	0.827	3.5798	4.781	0.4659	0.785	0.215	0.1939	0.4916	41.1246	43.3892	0.0514	1.2757	0.2207	1.0551	0.5635	0.227	0.827	0.5341	0.4417	0.4026	0.1778	0.215029	0.784971	279.062	356	61.5821	294.418	157.242	63.312	2058	356	1702	909	366	0.7839
2021	08.21	SS	4	900	86891	338	2302	1964	370	404	567	1169	1848	0.1468	0.853	6.1319	5.811	0.4231	0.7688	0.2312	0.1731	0.3887	44.2815	40.6758	0.0492	1.0767	0.1581	0.9186	0.5299	0.212	0.8532	0.5769	0.4922	0.4007	0.1972	0.231164	0.768836	313.922	338	49.6281	288.372	166.357	66.6603	2302	338	1964	1133	454	0.9288
2021	08.21	SS	4	800	68876	365	2187	1822	405	438	615	1168	1806	0.1669	0.833	4.2377	4.992	0.4407	0.7909	0.2091	0.1811	0.4574	37.8417	39.2712	0.0473	1.2457	0.2079	1.0378	0.5804	0.217	0.8331	0.5593	0.4659	0.3739	0.1742	0.209122	0.790878	293.008	365	60.9168	304.083	170.066	63.5871	2187	365	1822	1019	381	0.8028
2021	08.21	SS	4	700	58147	361	2387	2026	434	496	805	1461	2068	0.1512	0.849	2.4836	5.612	0.5429	0.8425	0.1575	0.306	0.7305	28.7391	38.6672	0.0411	1.5852	0.2397	1.3455	0.615	0.212	0.8488	0.4571	0.3879	0.3445	0.1336	0.157471	0.842529	227.732	361	54.5961	306.404	140.044	48.2442	2387	361	2026	926	319	0.6308
2021	08.21	SS	4	700	68954	337	2029	1692	379	405	596	1132	1662	0.1661	0.834	3.6251	5.021	0.4699	0.7831	0.2169	0.1537	0.5102	40.7923	44.2985	0.0583	1.3022	0.2163	1.086	0.5757	0.236	0.8339	0.5301	0.4421	0.4091	0.1809	0.216864	0.783136	258.793	337	55.9729	281.027	148.984	60.9556	2029	337	1692	897	367	0.7679
2021	08.21	SS	5	900	75342	340	1909	1569	370	394	519	945	1517	0.1781	0.822	5.1065	4.615	0.3856	0.7502	0.2498	0.153	0.3803	48.0586	47.3966	0.0534	1.1999	0.2137	0.9862	0.6059	0.246	0.8219	0.6144	0.505	0.4066	0.2053	0.249815	0.750185	283.357	340	60.5553	279.445	171.692	69.8167	1909	340	1569	964	392	0.8334
2021	08.21	SS	5	700	58076	326	2131	1805	373	412	624	1215	1812	0.153	0.847	3.6039	5.537	0.4925	0.8233	0.1767	0.2161	0.5503	32.2142	35.9949	0.046	1.3192	0.2018	1.1174	0.567	0.197	0.847	0.5075	0.4298	0.3483	0.1497	0.176762	0.823238	247.119	326	49.8714	276.129	140.13	48.8006	2131	326	1805	916	319	0.7581
2021	08.21	SS	5	800	76023	339	2077	1738	375	406	570	1115	1698	0.1632	0.837	4.4665	5.127	0.4465	0.7819	0.2181	0.1784	0.443	43.7811	43.4426	0.0547	1.1858	0.1935	0.9923	0.5492	0.216	0.8368	0.5535	0.4632	0.394	0.1825	0.218079	0.781921	285.883	339	55.3303	283.67	157.014	61.8589	2077	339	1738	962	379	0.8433
2021	08.21	SS	5	800	63313	315	1936	1621	350	390	564	1107	1633	0.1627	0.837	3.5863	5.146	0.4886	0.8131	0.1869	0.2468	0.512	39.0972	40.9731	0.0489	1.2516	0.2036	1.048	0.536	0.196	0.8373	0.5114	0.4282	0.3655	0.1565	0.186917	0.813083	251.678	315	51.2526	263.747	134.884	49.3001	1936	315	1621	829	303	0.799
2021	08.21	SS	5	800	71076	362	2443	2081	422	473	740	1417	2082	0.1482	0.852	3.3228	5.749	0.507	0.8265	0.1735	0.2451	0.6055	34.1939	40.8382	0.0427	1.4021	0.2078	1.1943	0.5888	0.207	0.8518	0.493	0.42	0.3519	0.1478	0.173487	0.826513	258.184	362	53.6406	308.359	152.031	53.4924	2443	362	2081	1026	361	0.7132
2021	08.21	SS	5	900	72305	338	1748	1410	367	392	526	978	1445	0.1934	0.807	3.4455	4.172	0.4539	0.7851	0.2149	0.1773	0.4444	51.3199	50.2507	0.057	1.2139	0.2347	0.9792	0.5347	0.21	0.8066	0.5461	0.4405	0.3935	0.1733	0.21489	0.78511	278.441	338	65.357	272.643	148.89	58.5892	1748	338	1410	770	303	0.8238
2021	08.21	SS	5	900	89296	353	2154	1801	387	419	580	1139	1769	0.1639	0.836	4.7686	5.102	0.4364	0.7862	0.2138	0.1777	0.4201	49.6208	47.769	0.0551	1.1514	0.1887	0.9627	0.5425	0.206	0.8361	0.5636	0.4712	0.3793	0.1787	0.213773	0.786227	306.583	353	57.85	295.15	166.339	63.0942	2154	353	1801	1015	385	0.8685
2021	08.21	SS	5	900	64184	325	1723	1398	359	388	540	1008	1456	0.1886	0.811	2.9017	4.302	0.4886	0.809	0.191	0.2074	0.5126	45.9508	48.2159	0.0511	1.2932	0.2439	1.0493	0.5367	0.2	0.8114	0.5114	0.415	0.3734	0.155	0.190957	0.809043	251.315	325	61.303	263.697	134.867	50.3627	1723	325	1398	715	267	0.7733
2021	08.21	SS	5	800	62302	310	1719	1409	349	381	557	1040	1458	0.1803	0.82	2.5603	4.545	0.5181	0.8148	0.1852	0.2271	0.5843	44.2563	49.9146	0.0553	1.376	0.2481	1.1279	0.5435	0.209	0.8197	0.4819	0.395	0.3844	0.1518	0.185242	0.814758	225.291	310	55.9046	254.095	122.449	47.0681	1719	310	1409	679	261	0.7267
2021	08.21	SS	6	800	71053	331	2029	1698	365	399	567	1108	1673	0.1631	0.837	4.1884	5.13	0.4576	0.7903	0.2097	0.2002	0.4633	41.8844	42.4055	0.0524	1.2098	0.1974	1.0124	0.5492	0.212	0.8369	0.5424	0.4539	0.3865	0.1755	0.209638	0.790362	273.599	331	53.9975	277.002	150.247	58.0759	2029	331	1698	921	356	0.8266
2021	08.21	SS	6	700	70653	343	1869	1526	381	414	581	1061	1522	0.1835	0.816	3.083	4.449	0.4705	0.7726	0.2274	0.2163	0.5199	46.3386	51.2004	0.0662	1.3533	0.2484	1.1049	0.585	0.251	0.8165	0.5295	0.4323	0.4295	0.1857	0.22742	0.77258	253.455	343	62.9476	280.052	148.285	63.6816	1869	343	1526	808	347	0.7389
2021	08.21	SS	6	800	56157	331	1569	1238	364	396	541	949	1295	0.211	0.789	2.1782	3.74	0.4992	0.7787	0.2213	0.2585	0.5654	45.3999	51.4238	0.0567	1.4355	0.3028	1.1327	0.5673	0.251	0.789	0.5008	0.3952	0.4419	0.1746	0.221304	0.778696	230.582	331	69.8286	261.171	130.797	57.8037	1569	331	1238	620	274	0.6966
2021	08.21	SS	6	800	81894	340	2029	1689	379	411	588	1115	1657	0.1676	0.832	3.8101	4.968	0.4589	0.7798	0.2202	0.1895	0.4894	48.5257	51.7608	0.0607	1.2814	0.2147	1.0667	0.5772	0.235	0.8324	0.5411	0.4505	0.407	0.1833	0.220228	0.779772	265.335	340	56.9739	283.026	153.159	62.3361	2029	340	1689	914	372	0.7804
2021	08.21	SS	6	800	79056	353	2218	1865	399	442	660	1266	1840	0.1592	0.841	3.444	5.283	0.4895	0.7973	0.2027	0.2306	0.5487	42.4285	47.5559	0.053	1.333	0.2121	1.1208	0.5721	0.227	0.8408	0.5105	0.4292	0.3971	0.1704	0.20272	0.79728	264.816	353	56.1808	296.819	151.513	60.1596	2218	353	1865	952	378	0.7502
2021	08.21	SS	6	800	74842	315	1824	1509	349	381	544	1031	1497	0.1727	0.827	3.431	4.79	0.4745	0.7833	0.2167	0.2121	0.5059	49.6364	52.9177	0.062	1.2887	0.2225	1.0661	0.5603	0.231	0.8273	0.5255	0.4348	0.4124	0.1793	0.216716	0.783284	244.432	315	54.3997	260.6	136.949	56.472	1824	315	1509	793	327	0.776
2021	08.21	SS	6	900	63910	344	1779	1435	377	407	563	1061	1503	0.1934	0.807	2.758	4.172	0.4997	0.8077	0.1923	0.2091	0.5087	44.5756	45.3839	0.0495	1.2622	0.2441	1.0181	0.5094	0.196	0.8066	0.5003	0.4036	0.3844	0.1551	0.192315	0.807685	272.54	344	66.5183	277.482	138.838	53.3693	1779	344	1435	718	276	0.7923
2021	08.21	SS	6	800	77204	350	2132	1782	398	450	684	1241	1782	0.1642	0.836	2.8381	5.091	0.5	0.8036	0.1964	0.2918	0.6248	43.3636	54.1842	0.0542	1.495	0.2454	1.2495	0.6248	0.245	0.8358	0.5	0.4179	0.3928	0.1642	0.1964	0.8036	234.114	350	57.4578	292.542	146.271	57.4578	2132	350	1782	891	350	0.6689
2021	08.21	SS	6	900	57998	341	1835	1494	377	410	570	1078	1563	0.1858	0.814	2.9479	4.381	0.4933	0.8179	0.1821	0.2209	0.5109	38.8597	40.2482	0.0432	1.2721	0.2364	1.0357	0.5248	0.189	0.8142	0.5067	0.4125	0.3593	0.1482	0.182057	0.817943	268.061	341	63.3684	277.632	140.674	50.546	1835	341	1494	757	272	0.7861
2021	08.21	SS	7	700	70718	361	2320	1959	415	459	689	1277	1933	0.1556	0.844	3.6427	5.427	0.4676	0.8025	0.1975	0.2246	0.5581	36.1384	43.1347	0.0516	1.4135	0.22	1.1936	0.6355	0.236	0.8444	0.5324	0.4496	0.371	0.1668	0.19752	0.80248	255.394	361	56.1728	304.827	162.294	60.2185	2320	361	1959	1043	387	0.7074
2021	08.21	SS	7	700	73076	365	2483	2118	422	469	715	1378	2075	0.147	0.853	3.9068	5.803	0.4783	0.8074	0.1926	0.2219	0.5508	34.5414	39.7811	0.0493	1.3502	0.1985	1.1517	0.6009	0.222	0.853	0.5217	0.445	0.3692	0.1643	0.192612	0.807388	270.33	365	53.6549	311.345	162.435	59.9758	2483	365	2118	1105	408	0.7406
2021	08.21	SS	7	800	73162	377	2274	1897	433	481	721	1295	1897	0.1658	0.834	2.9865	5.032	0.4839	0.8013	0.1987	0.253	0.6045	38.6064	48.223	0.0483	1.4973	0.2482	1.2491	0.6446	0.248	0.8342	0.5161	0.4305	0.3851	0.1658	0.19875	0.80125	251.787	377	62.5018	314.498	162.306	62.5018	2274	377	1897	979	377	0.6679
2021	08.21	SS	7	800	71104	358	2059	1701	395	428	591	1103	1675	0.1739	0.826	4.0263	4.751	0.438	0.7743	0.2257	0.194	0.4566	41.8409	43.6194	0.0523	1.2619	0.2194	1.0425	0.5859	0.235	0.8261	0.562	0.4643	0.4017	0.1865	0.225755	0.774245	283.699	358	62.2458	295.754	166.22	66.7664	2059	358	1701	956	384	0.7924
2021	08.21	SS	7	800	65609	342	1912	1570	378	407	557	1033	1561	0.1789	0.821	3.8528	4.591	0.4401	0.7764	0.2236	0.1847	0.4565	41.8283	43.3819	0.0523	1.2631	0.2259	1.0371	0.5807	0.232	0.8211	0.5599	0.4597	0.3993	0.1836	0.223568	0.776432	270.762	342	61.1736	280.826	157.227	62.7835	1912	342	1570	879	351	0.7917
2021	08.21	SS	7	700	55952	366	1881	1515	406	447	632	1101	1579	0.1946	0.805	2.444	4.139	0.4851	0.8007	0.1993	0.2706	0.5853	36.9709	44.5999	0.0528	1.4978	0.2914	1.2063	0.6211	0.24	0.8054	0.5149	0.4147	0.3872	0.1606	0.199369	0.800631	244.358	366	71.2153	294.785	151.77	58.7624	1881	366	1515	780	302	0.6677
2021	08.21	SS	7	800	59547	361	2275	1914	414	460	699	1292	1920	0.1587	0.841	3.2432	5.302	0.4864	0.8145	0.1855	0.2403	0.5886	31.1503	37.6971	0.0389	1.4384	0.2283	1.2102	0.6215	0.224	0.8413	0.5136	0.4321	0.3611	0.156	0.185461	0.814539	250.973	361	57.284	303.716	155.984	56.3319	2275	361	1914	983	355	0.6952
2021	08.21	SS	7	800	66714	347	2073	1726	382	411	566	1090	1700	0.1674	0.833	4.6473	4.974	0.4305	0.7839	0.2161	0.168	0.4229	38.6918	38.0148	0.0484	1.18	0.1975	0.9825	0.5596	0.212	0.8326	0.5695	0.4742	0.3795	0.1799	0.216125	0.783875	294.068	347	58.0844	288.916	164.545	62.4366	2073	347	1726	983	373	0.8474
2021	08.21	SS	7	800	58048	347	2298	1951	406	458	724	1346	1987	0.151	0.849	3.0135	5.622	0.512	0.8406	0.1594	0.2665	0.6441	29.7921	37.4762	0.0372	1.4817	0.2237	1.2579	0.6138	0.201	0.849	0.488	0.4143	0.3267	0.1353	0.15943	0.84057	234.19	347	52.3973	294.603	143.753	46.9613	2298	347	1951	952	311	0.6749
2021	08.21	SS	8	800	72067	363	2282	1919	401	438	617	1209	1886	0.1591	0.841	4.695	5.287	0.4409	0.7936	0.2064	0.1928	0.4412	37.594	37.6237	0.047	1.1901	0.1893	1.0008	0.5596	0.207	0.8409	0.5591	0.4702	0.3691	0.1735	0.206364	0.793636	305.016	363	57.7428	305.257	170.683	62.9921	2282	363	1919	1073	396	0.8403
2021	08.21	SS	8	800	76973	342	2441	2099	390	431	657	1312	2016	0.1401	0.86	4.7288	6.137	0.4621	0.7975	0.2025	0.1953	0.5002	36.7104	39.738	0.0459	1.2588	0.1764	1.0825	0.5822	0.219	0.8599	0.5379	0.4625	0.3764	0.1741	0.202466	0.797534	271.687	342	47.9164	294.084	158.18	59.5453	2441	342	2099	1129	425	0.7944
2021	08.21	SS	8	800	79086	362	2468	2106	409	449	666	1325	2034	0.1467	0.853	4.6663	5.818	0.4573	0.7939	0.2061	0.1899	0.4812	37.5922	39.5571	0.047	1.2331	0.1809	1.0523	0.5711	0.217	0.8533	0.5427	0.4631	0.3797	0.1759	0.206063	0.793937	293.569	362	53.0972	308.903	167.652	63.658	2468	362	2106	1143	434	0.8109
2021	08.21	SS	8	900	62824	317	1863	1546	353	382	534	1019	1537	0.1702	0.83	3.9352	4.877	0.4541	0.7891	0.2109	0.1876	0.4679	40.6761	41.9122	0.0452	1.2417	0.2113	1.0304	0.5625	0.217	0.8298	0.5459	0.453	0.3863	0.175	0.210881	0.789119	255.295	317	53.9393	263.061	143.611	55.4707	1863	317	1546	844	326	0.8054
2021	08.21	SS	8	900	77620	345	2344	1999	386	422	613	1238	1925	0.1472	0.853	5.0981	5.794	0.4467	0.7904	0.2096	0.1801	0.4469	38.8686	38.8831	0.0432	1.173	0.1727	1.0004	0.5535	0.21	0.8528	0.5533	0.4718	0.3788	0.1788	0.20959	0.79041	294.118	345	50.7786	294.221	162.786	61.6702	2344	345	1999	1106	419	0.8525
2021	08.21	SS	8	700	60669	317	2254	1937	356	391	574	1216	1889	0.1406	0.859	5.3021	6.11	0.4641	0.8116	0.1884	0.1807	0.4423	31.3606	29.8838	0.0448	1.1089	0.1559	0.9529	0.5106	0.18	0.8594	0.5359	0.4605	0.3516	0.1619	0.188422	0.811578	285.869	317	44.5825	272.418	145.983	51.3332	2254	317	1937	1038	365	0.9018
2021	08.21	SS	8	800	67476	330	2094	1764	370	405	588	1166	1753	0.1576	0.842	4.0493	5.345	0.4739	0.8067	0.1933	0.1984	0.4875	38.2908	39.39	0.0479	1.2212	0.1924	1.0287	0.5412	0.199	0.8424	0.5261	0.4432	0.3675	0.1628	0.193342	0.806658	270.226	330	52.0057	277.994	146.246	53.7393	2094	330	1764	928	341	0.8189
2021	08.21	SS	8	800	56494	344	1900	1556	385	423	611	1128	1624	0.1811	0.819	2.6776	4.523	0.5039	0.8226	0.1774	0.2442	0.572	36.3463	41.2604	0.0454	1.3862	0.251	1.1352	0.5632	0.201	0.8189	0.4961	0.4063	0.3575	0.1453	0.177356	0.822644	248.16	344	62.2821	281.718	139.773	49.9705	1900	344	1556	772	276	0.7214
2021	08.21	SS	8	800	72737	345	2003	1658	383	416	586	1091	1652	0.1722	0.828	3.7635	4.806	0.4499	0.7883	0.2117	0.199	0.4845	43.9095	47.2841	0.0549	1.3009	0.2241	1.0769	0.5923	0.228	0.8278	0.5501	0.4553	0.3849	0.1752	0.211733	0.788267	265.201	345	59.4234	285.577	157.084	60.4568	2003	345	1658	912	351	0.7687
2021	08.21	C	9	700	65700	369	2393	2024	430	480	752	1402	2061	0.1542	0.846	3.001	5.485	0.5104	0.836	0.164	0.247	0.6308	32.4996	40.1657	0.0464	1.4612	0.2253	1.2359	0.6051	0.203	0.8458	0.4896	0.4141	0.335	0.1387	0.164016	0.835984	252.532	369	56.8997	312.1	152.812	51.1943	2393	369	2024	991	332	0.6844
2021	08.21	C	9	600	49191	317	1608	1291	352	383	532	988	1352	0.1971	0.803	2.3572	4.073	0.5198	0.8017	0.1983	0.2401	0.5551	38.1419	40.7377	0.0636	1.3303	0.2623	1.0681	0.5129	0.212	0.8029	0.4802	0.3856	0.4129	0.1592	0.198275	0.801725	238.292	317	62.4932	254.507	122.226	50.4677	1608	317	1291	620	256	0.7517
2021	08.21	C	9	700	75280	361	2517	2156	414	456	690	1380	2121	0.1434	0.857	4.4199	5.972	0.4726	0.8163	0.1837	0.1948	0.5087	34.9556	37.6199	0.0499	1.2564	0.1802	1.0762	0.5676	0.198	0.8566	0.5274	0.4517	0.3483	0.1573	0.183693	0.816307	287.329	361	51.7763	309.224	163.074	56.7962	2517	361	2156	1137	396	0.7959
2021	08.21	C	9	900	68958	348	1687	1339	374	399	516	934	1368	0.2063	0.794	3.4221	3.848	0.4376	0.7618	0.2382	0.1867	0.4182	51.5388	49.2521	0.0573	1.204	0.2484	0.9556	0.5374	0.228	0.7937	0.5624	0.4464	0.4236	0.1891	0.238233	0.761767	289.037	348	71.7866	276.213	155.331	65.8044	1687	348	1339	753	319	0.8306
2021	08.21	C	9	900	79770	332	1736	1404	354	379	490	923	1396	0.1912	0.809	4.3997	4.229	0.4209	0.7578	0.2422	0.1781	0.3751	56.8554	50.6664	0.0632	1.1019	0.2107	0.8911	0.516	0.216	0.8088	0.5791	0.4683	0.4182	0.1959	0.24218	0.75782	301.298	332	63.4931	268.507	155.482	65.023	1736	332	1404	813	340	0.9075
2021	08.21	C	9	900	57699	331	1558	1227	356	379	493	877	1275	0.2125	0.788	3.0681	3.707	0.445	0.7694	0.2306	0.1874	0.4401	47.0639	46.5467	0.0523	1.2558	0.2668	0.989	0.5489	0.228	0.7875	0.555	0.4371	0.4156	0.1816	0.230658	0.769342	263.577	331	70.3216	260.678	144.68	60.1239	1558	331	1227	681	283	0.7963
2021	08.21	C	9	900	68573	329	1688	1359	356	380	508	934	1389	0.1949	0.805	3.5021	4.131	0.4452	0.78	0.22	0.1766	0.439	50.4978	49.8023	0.0561	1.225	0.2388	0.9862	0.5472	0.217	0.8051	0.5548	0.4467	0.3966	0.1771	0.220034	0.779966	268.571	329	64.1238	264.876	146.958	58.2767	1688	329	1359	754	299	0.8163
2021	08.21	C	9	900	61105	358	1660	1302	385	409	525	942	1367	0.2157	0.784	3.066	3.637	0.4485	0.775	0.225	0.1843	0.4275	46.9711	44.7727	0.0522	1.2153	0.2621	0.9532	0.5256	0.215	0.7843	0.5515	0.4325	0.4081	0.1765	0.225067	0.774933	294.577	358	77.2072	280.793	154.846	63.1892	1660	358	1302	718	293	0.8228
2021	08.21	C	9	900	65351	327	1625	1298	353	376	491	901	1331	0.2012	0.799	3.4993	3.969	0.4422	0.7735	0.2265	0.1772	0.4212	50.3868	47.9874	0.056	1.1923	0.2399	0.9524	0.5312	0.216	0.7988	0.5578	0.4455	0.4061	0.1809	0.226523	0.773477	274.26	327	65.8025	261.197	145.691	59.1618	1625	327	1298	724	294	0.8387
2021	08.21	C	10	700	66039	370	2275	1905	421	461	677	1255	1908	0.1626	0.837	3.581	5.149	0.4646	0.8073	0.1927	0.21	0.5372	34.7052	40.1299	0.0496	1.3809	0.2246	1.1563	0.6191	0.223	0.8374	0.5354	0.4484	0.3598	0.1613	0.192637	0.807363	267.941	370	60.1758	309.824	165.89	59.6879	2275	370	1905	1020	367	0.7242
2021	08.21	C	10	800	73399	378	2604	2226	429	475	713	1419	2199	0.1452	0.855	4.4518	5.889	0.4677	0.8181	0.1819	0.2066	0.5016	33.0126	35.4122	0.0413	1.2548	0.1822	1.0727	0.571	0.195	0.8548	0.5323	0.4551	0.3418	0.1555	0.18194	0.81806	301.243	378	54.871	323.129	172.016	58.7903	2604	378	2226	1185	405	0.7969
2021	08.21	C	10	800	83608	359	2441	2082	395	426	587	1205	1998	0.1471	0.853	6.7038	5.799	0.4063	0.7872	0.2128	0.1489	0.365	40.1972	36.111	0.0502	1.0532	0.1549	0.8983	0.5333	0.191	0.8529	0.5937	0.5063	0.3584	0.1815	0.212782	0.787218	340.866	359	52.7984	306.202	181.78	65.1524	2441	359	2082	1236	443	0.9494
2021	08.21	C	10	800	71890	330	1712	1382	360	391	527	944	1397	0.1928	0.807	3.2948	4.188	0.4443	0.7721	0.2279	0.2243	0.4752	52.0582	55.6757	0.0651	1.3249	0.2554	1.0695	0.5943	0.244	0.8072	0.5557	0.4486	0.4102	0.184	0.227948	0.772052	249.075	330	63.6098	266.39	148.037	60.7185	1712	330	1382	768	315	0.7548
2021	08.21	C	10	800	60568	351	1608	1257	380	406	536	940	1329	0.2183	0.782	2.5271	3.581	0.4686	0.778	0.222	0.2068	0.4906	48.1843	50.4476	0.0602	1.3393	0.2924	1.047	0.5564	0.232	0.7817	0.5314	0.4154	0.4177	0.1735	0.221966	0.778034	262.077	351	76.6175	274.382	145.813	60.9011	1608	351	1257	668	279	0.7466
2021	08.21	C	10	700	54132	355	1723	1368	389	423	578	1037	1455	0.206	0.794	2.353	3.854	0.4985	0.8041	0.1959	0.2485	0.5434	39.6095	43.1716	0.0566	1.3728	0.2828	1.0899	0.5466	0.214	0.794	0.5015	0.3981	0.3907	0.1555	0.195936	0.804064	258.596	355	73.1428	281.857	141.341	55.2176	1723	355	1368	686	268	0.7285
2021	08.21	C	10	800	73046	356	1986	1630	393	422	581	1095	1631	0.1793	0.821	3.7203	4.579	0.4534	0.7822	0.2178	0.1779	0.4601	44.8527	45.5204	0.0561	1.2365	0.2217	1.0149	0.5548	0.221	0.8207	0.5466	0.4486	0.3984	0.1788	0.217765	0.782235	287.909	356	63.8147	292.185	159.716	63.6354	1986	356	1630	891	355	0.8087
2021	08.21	C	10	800	74566	340	1949	1609	370	397	534	1020	1583	0.1744	0.826	4.6771	4.732	0.4226	0.7725	0.2275	0.1678	0.4019	46.3828	44.1091	0.058	1.1519	0.201	0.951	0.5491	0.216	0.8256	0.5774	0.4767	0.394	0.1878	0.227496	0.772504	295.165	340	59.3125	280.688	162.063	63.8481	1949	340	1609	929	366	0.8681
2021	08.21	C	10	800	77536	337	2140	1803	374	405	570	1148	1751	0.1575	0.843	4.7978	5.35	0.4498	0.7842	0.2158	0.1719	0.4308	43.0432	41.221	0.0538	1.1367	0.179	0.9577	0.5269	0.207	0.8425	0.5502	0.4636	0.3921	0.1818	0.215733	0.784267	296.472	337	53.0696	283.93	156.217	61.2584	2140	337	1803	992	389	0.8798
2021	08.21	C	11	700	54362	354	1669	1315	389	416	555	1000	1403	0.2121	0.788	2.4354	3.715	0.4913	0.7977	0.2023	0.2053	0.5095	41.3792	42.9165	0.0591	1.3164	0.2792	1.0372	0.5276	0.21	0.7879	0.5087	0.4008	0.3976	0.1594	0.202259	0.797741	268.915	354	75.0845	278.916	141.897	56.4194	1669	354	1315	669	266	0.7597
2021	08.21	C	11	800	72829	333	2007	1674	366	394	537	1032	1623	0.1659	0.834	5.01	5.027	0.4176	0.7706	0.2294	0.1673	0.4062	43.5455	42.3619	0.0544	1.1663	0.1935	0.9728	0.5666	0.223	0.8341	0.5824	0.4858	0.3938	0.1913	0.229349	0.770651	285.518	333	55.2511	277.749	161.771	63.713	2007	333	1674	975	384	0.8574
2021	08.21	C	11	800	68568	366	1681	1315	387	405	478	734	1270	0.2177	0.782	5.9412	3.593	0.2798	0.6875	0.3125	0.1369	0.2839	52.1826	52.9388	0.0652	1.2969	0.2824	1.0145	0.7306	0.317	0.7823	0.7202	0.5634	0.434	0.2445	0.312567	0.687433	282.211	366	79.6883	286.312	206.188	89.486	1681	366	1315	947	411	0.7711
2021	08.21	C	11	700	37899	286	1280	994	310	333	442	777	1080	0.2234	0.777	2.1756	3.476	0.494	0.7988	0.2012	0.2314	0.5231	38.1675	40.4218	0.0545	1.3638	0.3047	1.0591	0.5359	0.213	0.7766	0.506	0.393	0.3976	0.1563	0.201186	0.798814	209.708	286	63.9031	222.097	112.389	44.6875	1280	286	994	503	200	0.7333
2021	08.21	C	11	900	56657	359	1612	1253	386	410	525	902	1312	0.2227	0.777	2.9009	3.49	0.4334	0.7606	0.2394	0.1915	0.4416	45.2566	46.1178	0.0503	1.311	0.292	1.019	0.5774	0.244	0.7773	0.5666	0.4404	0.4225	0.1861	0.239388	0.760611	273.837	359	79.951	279.049	158.12	66.8114	1612	359	1253	710	300	0.7628
2021	08.21	C	11	900	47853	357	1458	1101	379	399	489	835	1212	0.2449	0.755	2.7479	3.084	0.4342	0.7766	0.2234	0.1817	0.3996	43.5026	40.0442	0.0483	1.219	0.2985	0.9205	0.5209	0.206	0.7551	0.5658	0.4273	0.3949	0.1687	0.223434	0.776566	292.863	357	87.4136	269.586	152.545	60.2346	1458	357	1101	623	246	0.8204
2021	08.21	C	11	900	72051	354	1887	1533	383	408	538	996	1532	0.1876	0.812	4.259	4.331	0.4188	0.7684	0.2316	0.1631	0.4001	47.0398	44.9394	0.0523	1.176	0.2206	0.9553	0.5553	0.221	0.8124	0.5812	0.4722	0.3984	0.1881	0.23155	0.76845	301.02	354	66.4102	287.59	167.151	66.5978	1887	354	1533	891	355	0.8504
2021	08.21	C	11	900	54683	342	1475	1133	360	377	461	814	1193	0.2319	0.768	3.5338	3.313	0.4166	0.7511	0.2489	0.15	0.3501	48.3034	40.5939	0.0537	1.0941	0.2537	0.8404	0.4903	0.209	0.7681	0.5834	0.4481	0.4266	0.1912	0.248878	0.751122	312.586	342	79.2976	262.702	153.262	65.3858	1475	342	1133	661	282	0.914
2021	08.21	C	11	900	60030	333	1595	1262	356	377	478	853	1282	0.2088	0.791	3.8361	3.79	0.412	0.752	0.248	0.1664	0.383	47.6067	44.2498	0.0529	1.1747	0.2453	0.9295	0.5465	0.231	0.7912	0.588	0.4652	0.4218	0.1962	0.248018	0.751982	283.477	333	69.5229	263.477	154.913	65.3473	1595	333	1262	742	313	0.8512
2021	08.21	C	12	800	83060	379	2605	2226	425	463	677	1340	2149	0.1455	0.855	5.3262	5.873	0.4317	0.7951	0.2049	0.1707	0.4462	37.3528	38.6095	0.0467	1.2096	0.176	1.0336	0.5874	0.212	0.8545	0.5683	0.4856	0.3605	0.175	0.204872	0.795128	313.327	379	55.1405	323.86	184.044	66.3432	2605	379	2226	1265	456	0.8267
2021	08.21	C	12	700	69144	337	1973	1636	374	407	572	1069	1609	0.1708	0.829	3.8712	4.855	0.4474	0.7775	0.2225	0.2017	0.4788	42.3033	45.2699	0.0604	1.2906	0.2204	1.0701	0.5913	0.238	0.8292	0.5526	0.4582	0.4027	0.1845	0.222532	0.777468	261.119	337	57.5616	279.438	154.409	62.1733	1973	337	1636	904	364	0.7749
2021	08.21	C	12	700	71481	359	2157	1798	401	439	627	1139	1764	0.1664	0.834	3.9645	5.008	0.4338	0.7814	0.2186	0.2113	0.4968	39.7952	45.5774	0.0569	1.374	0.2287	1.1453	0.6485	0.25	0.8336	0.5662	0.472	0.3861	0.1822	0.21861	0.78139	261.281	359	59.7501	299.25	169.431	65.4089	2157	359	1798	1018	393	0.7278
2021	08.21	C	12	700	45257	294	1486	1192	320	340	450	825	1213	0.1978	0.802	3.4451	4.054	0.4455	0.771	0.229	0.1678	0.4362	38.0067	37.2194	0.0543	1.2208	0.2415	0.9793	0.543	0.224	0.8022	0.5545	0.4448	0.413	0.1837	0.229008	0.770992	240.826	294	58.1669	235.833	130.777	54.0121	1486	294	1192	661	273	0.8191
2021	08.21	C	12	800	75037	349	2018	1669	377	405	531	999	1610	0.1729	0.827	5.5362	4.782	0.3895	0.7555	0.2445	0.1678	0.3635	44.9985	41.9986	0.0562	1.1285	0.1952	0.9333	0.5698	0.228	0.8271	0.6105	0.505	0.4004	0.2022	0.244444	0.755556	309.26	349	60.3573	288.643	176.229	70.561	2018	349	1669	1019	408	0.8861
2021	08.21	C	12	700	65216	334	1703	1369	361	385	504	912	1344	0.1961	0.804	3.8328	4.099	0.4222	0.7378	0.2622	0.1753	0.4139	47.677	46.7422	0.0681	1.2196	0.2392	0.9804	0.5665	0.257	0.8039	0.5778	0.4645	0.4539	0.2108	0.262263	0.737737	273.86	334	65.5056	268.494	155.135	70.4087	1703	334	1369	791	359	0.82
2021	08.21	C	12	800	58398	369	1986	1617	408	443	615	1088	1643	0.1858	0.814	3.2561	4.382	0.4447	0.7879	0.2121	0.2165	0.5071	36.1544	41.2331	0.0452	1.4007	0.2603	1.1405	0.6334	0.242	0.8142	0.5553	0.4522	0.382	0.1727	0.212125	0.787875	263.44	369	68.5604	300.44	166.849	63.7296	1986	369	1617	898	343	0.7139
2021	08.21	C	12	800	66270	361	2020	1659	396	425	581	1053	1636	0.1787	0.821	4.1474	4.596	0.4171	0.7685	0.2315	0.1748	0.442	39.985	42.3733	0.05	1.2903	0.2306	1.0597	0.6177	0.245	0.8213	0.5829	0.4787	0.3971	0.1901	0.23147	0.76853	279.78	361	64.5153	296.485	172.815	68.6257	2020	361	1659	967	384	0.775
2021	08.21	C	12	900	62905	394	2167	1773	428	460	580	948	1772	0.1818	0.818	6.0324	4.5	0.3125	0.7772	0.2228	0.1805	0.3497	35.5188	39.7503	0.0395	1.3678	0.2487	1.1191	0.7694	0.249	0.8182	0.6875	0.5625	0.324	0.1823	0.22275	0.77725	288.054	394	71.6364	322.364	221.636	71.8182	2167	394	1773	1219	395	0.7311
2021	08.21	C	13	800	67783	333	1875	1542	362	384	512	979	1513	0.1776	0.822	4.7656	4.631	0.4189	0.7652	0.2348	0.1427	0.3869	43.9971	40.6371	0.055	1.1231	0.1995	0.9236	0.5367	0.217	0.8224	0.5811	0.4779	0.404	0.1931	0.234764	0.765236	296.501	333	59.1408	273.859	159.13	64.2912	1875	333	1542	896	362	0.8904
2021	08.21	C	13	700	70171	350	2126	1776	393	430	630	1175	1759	0.1646	0.835	3.5993	5.074	0.4645	0.7934	0.2066	0.2083	0.5255	39.5498	44.7432	0.0565	1.3543	0.223	1.1313	0.6058	0.234	0.8354	0.5355	0.4473	0.3859	0.1726	0.206649	0.793351	258.436	350	57.6199	292.38	156.562	60.4186	2126	350	1776	951	367	0.7384
2021	08.21	C	13	700	64435	350	1859	1509	388	420	593	1080	1547	0.1883	0.812	2.8048	4.311	0.4838	0.7932	0.2068	0.2121	0.5368	42.7394	47.4232	0.0611	1.3669	0.2574	1.1096	0.5728	0.229	0.8117	0.5162	0.419	0.4005	0.1678	0.206738	0.793262	256.054	350	65.8956	284.104	146.665	58.7413	1859	350	1509	779	312	0.7316
2021	08.21	C	13	800	65786	342	1886	1544	378	408	568	1056	1573	0.1813	0.819	3.3934	4.515	0.4624	0.7973	0.2027	0.1943	0.4879	42.6466	44.9959	0.0533	1.2888	0.2337	1.0551	0.5672	0.214	0.8187	0.5376	0.4401	0.3771	0.166	0.202729	0.797271	265.363	342	62.017	279.983	150.509	56.7582	1886	342	1544	830	313	0.7759
2021	08.21	C	13	700	62156	312	1681	1369	339	364	488	914	1378	0.1856	0.814	3.8932	4.388	0.4397	0.7787	0.2213	0.1826	0.4285	45.4416	44.2842	0.0649	1.1966	0.2221	0.9745	0.546	0.216	0.8144	0.5603	0.4563	0.395	0.1802	0.221319	0.778682	260.739	312	57.9084	254.092	142.358	56.238	1681	312	1369	767	303	0.8357
2021	08.21	C	13	700	69044	349	1939	1590	380	409	553	1040	1592	0.18	0.82	4.1159	4.556	0.4346	0.7818	0.2182	0.1824	0.4277	43.4633	42.7714	0.0621	1.2001	0.216	0.9841	0.5564	0.215	0.82	0.5654	0.4636	0.386	0.179	0.218244	0.781756	290.809	349	62.8164	286.184	161.811	62.4564	1939	349	1590	899	347	0.8333
2021	08.21	C	13	700	62259	359	1720	1361	388	414	545	965	1415	0.2087	0.791	3.0442	3.791	0.4453	0.7759	0.2241	0.191	0.4555	45.7844	46.8421	0.0654	1.293	0.2699	1.0231	0.5676	0.229	0.7913	0.5547	0.439	0.404	0.1773	0.224099	0.775901	277.649	359	74.9308	284.069	157.584	63.6599	1720	359	1361	755	305	0.7734
2021	08.21	C	13	700	74995	366	2027	1661	399	430	576	1041	1633	0.1806	0.819	4.3652	4.538	0.4064	0.7628	0.2372	0.1866	0.4214	45.1897	46.8634	0.0646	1.2655	0.2285	1.037	0.6156	0.246	0.8194	0.5936	0.4864	0.3996	0.1944	0.237203	0.762797	289.214	366	66.0858	299.914	178.035	71.1416	2027	366	1661	986	394	0.7902
2021	08.21	C	13	800	70067	359	1942	1583	389	415	550	968	1582	0.1849	0.815	4.5823	4.409	0.3847	0.7726	0.2274	0.1642	0.4022	44.3017	46.3143	0.0554	1.2825	0.2371	1.0454	0.6432	0.238	0.8151	0.6153	0.5015	0.3696	0.1854	0.227415	0.772585	279.922	359	66.3651	292.635	180.055	66.5499	1942	359	1583	974	360	0.7797
2021	08.21	C	14	700	72031	354	2148	1794	393	425	591	1115	1758	0.1648	0.835	4.6121	5.068	0.4242	0.7826	0.2174	0.1784	0.4404	40.1905	41.7221	0.0574	1.243	0.2048	1.0381	0.5978	0.226	0.8352	0.5758	0.4809	0.3775	0.1816	0.217364	0.782636	284.795	354	58.3408	295.659	170.243	64.2737	2148	354	1794	1033	390	0.8045
2021	08.21	C	14	700	65659	350	1900	1550	396	436	634	1106	1558	0.1842	0.816	2.5251	4.429	0.4877	0.7794	0.2206	0.2581	0.6108	42.4001	53.0936	0.0606	1.535	0.2828	1.2522	0.6415	0.276	0.8158	0.5123	0.4179	0.4307	0.18	0.220648	0.779352	228.013	350	64.4737	285.526	146.263	63	1900	350	1550	794	342	0.6515
2021	08.21	C	14	700	71733	329	2047	1718	357	394	550	1074	1673	0.1607	0.839	4.8238	5.222	0.4336	0.7823	0.2177	0.2154	0.4288	41.793	41.3255	0.0597	1.1782	0.1894	0.9888	0.56	0.215	0.8393	0.5664	0.4753	0.3844	0.1827	0.217724	0.782276	279.24	329	52.8779	276.122	156.383	60.1104	2047	329	1718	973	374	0.8488
2021	08.21	C	14	700	69726	338	1885	1547	367	392	521	994	1525	0.1793	0.821	4.5721	4.577	0.424	0.7673	0.2327	0.1616	0.3943	45.111	41.9477	0.0644	1.133	0.2032	0.9299	0.5356	0.216	0.8207	0.576	0.4727	0.404	0.191	0.232704	0.767296	298.323	338	60.6069	277.393	159.766	64.5517	1885	338	1547	891	360	0.8826
2021	08.21	C	14	700	74653	372	2138	1766	418	457	651	1158	1765	0.174	0.826	3.4434	4.747	0.4451	0.7888	0.2112	0.2208	0.5266	42.3118	50.0635	0.0604	1.4324	0.2492	1.1832	0.6566	0.25	0.826	0.5549	0.4584	0.3806	0.1745	0.211195	0.788805	259.704	372	64.7259	307.274	170.514	64.8999	2138	372	1766	980	373	0.6981
2021	08.21	C	14	800	72523	367	1853	1486	397	421	550	1018	1514	0.1981	0.802	3.704	4.049	0.4381	0.7719	0.2281	0.1615	0.4105	48.8433	45.7672	0.0611	1.1684	0.2314	0.937	0.5265	0.214	0.8019	0.5619	0.4506	0.406	0.1829	0.228131	0.771869	314.105	367	72.687	294.313	165.378	67.1414	1853	367	1486	835	339	0.8558
2021	08.21	C	14	800	69615	359	1816	1457	390	413	536	958	1466	0.1977	0.802	3.9461	4.058	0.4111	0.7598	0.2402	0.1579	0.4049	47.8192	47.1007	0.0598	1.2277	0.2427	0.985	0.58	0.237	0.8023	0.5889	0.4725	0.4079	0.1927	0.240212	0.759788	292.417	359	70.9697	288.03	169.616	69.1905	1816	359	1457	858	350	0.8146
2021	08.21	C	14	700	70859	360	1933	1573	391	419	560	1053	1583	0.1862	0.814	3.9113	4.369	0.4406	0.7775	0.2225	0.178	0.4238	45.0868	43.3736	0.0644	1.1822	0.2202	0.962	0.5382	0.214	0.8138	0.5594	0.4553	0.3977	0.1811	0.222473	0.777527	304.517	360	67.046	292.954	163.89	65.1837	1933	360	1573	880	350	0.8459
2021	08.21	C	14	725	70849.9	353.625	1965	1611.38	388.625	419.625	574.125	1059.5	1605.25	0.180625	0.819375	3.94224	4.56487	0.43805	0.7762	0.2238	0.191462	0.455012	44.1945	45.5492	0.060975	1.26249	0.227963	1.03453	0.579525	0.231	0.819375	0.56195	0.46045	0.3986	0.183313	0.223993	0.776007	280.102	353.625	63.966	289.659	162.757	64.7939	1965	353.625	1611.38	905.5	359.75	0.800225
2021	08.21	C	15	700	59506	310	2014	1704	348	378	547	1048	1666	0.1539	0.846	4.739	5.497	0.4331	0.7958	0.2042	0.1761	0.4636	34.9609	37.4243	0.0499	1.2652	0.1947	1.0705	0.6068	0.219	0.8461	0.5669	0.4796	0.3602	0.1728	0.204197	0.795803	245.021	310	47.716	262.284	148.689	53.565	2014	310	1704	966	348	0.7904
2021	08.21	C	15	700	67500	325	1681	1356	351	367	470	871	1345	0.1933	0.807	4.7003	4.172	0.4027	0.7522	0.2478	0.118	0.3564	49.8182	44.1004	0.0712	1.0974	0.2122	0.8852	0.5288	0.219	0.8067	0.5973	0.4819	0.4148	0.1999	0.24776	0.75224	296.155	325	62.8346	262.165	156.603	64.9613	1681	325	1356	810	336	0.9113
2021	08.21	C	15	700	60424	359	1774	1415	390	418	561	1012	1467	0.2024	0.798	2.9649	3.942	0.4615	0.783	0.217	0.1979	0.4759	42.7417	44.0726	0.0611	1.2927	0.2616	1.0311	0.5553	0.224	0.7976	0.5385	0.4295	0.4029	0.1731	0.216962	0.783038	277.713	359	72.6499	286.35	154.204	62.1268	1774	359	1415	762	307	0.7735
2021	08.21	C	15	700	62944	364	1724	1360	390	413	521	909	1399	0.2111	0.789	3.8251	3.736	0.4007	0.761	0.239	0.1691	0.3848	46.3215	44.48	0.0662	1.2173	0.257	0.9602	0.5754	0.229	0.7889	0.5993	0.4727	0.3988	0.1885	0.239001	0.760999	299.022	364	76.8538	287.146	172.077	68.6195	1724	364	1360	815	325	0.8215
2021	08.21	C	15	800	56940	340	1678	1338	370	393	520	937	1377	0.2026	0.797	3.2294	3.935	0.4462	0.775	0.225	0.1719	0.4484	42.5951	42.8092	0.0532	1.2604	0.2554	1.005	0.5566	0.226	0.7974	0.5538	0.4416	0.4062	0.1794	0.224954	0.775046	269.756	340	68.8915	271.108	150.143	60.9893	1678	340	1338	741	301	0.7934
2021	08.21	C	15	700	44678	313	1399	1086	340	368	491	861	1189	0.2237	0.776	2.0352	3.47	0.5046	0.8066	0.1934	0.2578	0.5463	41.1789	44.5854	0.0588	1.3948	0.3121	1.0827	0.5364	0.209	0.7763	0.4954	0.3846	0.3903	0.1501	0.193355	0.806645	224.405	313	70.0279	242.972	120.367	46.9836	1399	313	1086	538	210	0.717
2021	08.21	C	15	700	67260	365	2087	1722	403	435	605	1109	1721	0.1749	0.825	3.9657	4.718	0.4321	0.7875	0.2125	0.1858	0.4646	39.0983	42.0412	0.0559	1.3032	0.2279	1.0753	0.6107	0.229	0.8251	0.5679	0.4686	0.3742	0.1754	0.212508	0.787492	280.08	365	63.8356	301.164	171.045	64.0105	2087	365	1722	978	366	0.7674
2021	08.21	C	15	700	76973	386	2324	1938	426	461	631	1171	1916	0.1661	0.834	4.9259	5.021	0.4051	0.7895	0.2105	0.1806	0.4214	39.7573	41.3611	0.0568	1.2475	0.2072	1.0403	0.6189	0.219	0.8339	0.5949	0.4961	0.3539	0.1756	0.210535	0.789465	309.419	386	64.1119	321.888	191.505	67.7659	2324	386	1938	1153	408	0.8016
2021	08.21	C	15	700	75259	385	2406	2021	427	462	650	1240	1999	0.16	0.84	4.8503	5.249	0.4231	0.7986	0.2014	0.1732	0.4371	37.278	38.5134	0.0533	1.23	0.1968	1.0331	0.5961	0.208	0.84	0.5769	0.4846	0.3491	0.1692	0.201396	0.798604	313.008	385	61.6064	323.394	186.579	65.1268	2406	385	2021	1166	407	0.813
2021	08.21	C	16	700	62639	310	1973	1663	344	373	529	1047	1627	0.1571	0.843	4.7797	5.365	0.4432	0.7919	0.2081	0.1744	0.439	37.7058	37.3477	0.0539	1.1751	0.1846	0.9905	0.5515	0.206	0.8429	0.5568	0.4693	0.3737	0.1754	0.208076	0.791924	263.807	310	48.7076	261.292	145.494	54.3639	1973	310	1663	926	346	0.851
2021	08.21	C	16	800	77581	362	2301	1939	397	429	592	1169	1883	0.1573	0.843	5.5538	5.356	0.4162	0.7844	0.2156	0.165	0.3954	40.0501	38.0484	0.0501	1.1274	0.1774	0.95	0.5546	0.205	0.8427	0.5838	0.492	0.3693	0.1817	0.215597	0.784403	321.093	362	56.9509	305.049	178.089	65.761	2301	362	1939	1132	418	0.887
2021	08.21	C	16	800	72064	355	2205	1850	396	431	610	1180	1829	0.161	0.839	4.3937	5.211	0.4459	0.7968	0.2032	0.1892	0.4595	38.9929	40.1745	0.0487	1.228	0.1977	1.0303	0.5708	0.209	0.839	0.5541	0.4649	0.3668	0.1705	0.203244	0.796756	289.088	355	57.1542	297.846	165.023	60.5351	2205	355	1850	1025	376	0.8143
2021	08.21	C	16	600	52258	322	1973	1651	364	402	596	1130	1670	0.1632	0.837	3.3001	5.127	0.4894	0.8165	0.1835	0.2302	0.5532	31.6914	35.8228	0.0528	1.3508	0.2205	1.1304	0.5772	0.207	0.8368	0.5106	0.4273	0.3594	0.1536	0.18351	0.81649	238.377	322	52.5514	269.449	137.58	49.4506	1973	322	1651	843	303	0.7403
2021	08.21	C	16	800	71180	376	2144	1768	414	448	617	1105	1759	0.1754	0.825	4.1792	4.702	0.4123	0.7822	0.2178	0.1923	0.4544	40.2996	44.4088	0.0504	1.3363	0.2344	1.102	0.6476	0.24	0.8246	0.5877	0.4846	0.3705	0.1796	0.217743	0.782257	281.374	376	65.9403	310.06	182.213	67.5187	2144	376	1768	1039	385	0.7483
2021	08.21	C	16	900	77103	370	1846	1476	402	442	589	995	1438	0.2004	0.8	3.0986	3.989	0.4234	0.7236	0.2764	0.271	0.4946	52.2769	61.0595	0.0581	1.4608	0.2928	1.168	0.6734	0.323	0.7996	0.5766	0.461	0.4794	0.221	0.276422	0.723578	253.286	370	74.1603	295.84	170.569	81.7768	1846	370	1476	851	408	0.6846
2021	08.21	C	16	600	45515	338	2086	1748	396	449	710	1256	1820	0.162	0.838	2.4173	5.172	0.5252	0.8478	0.1522	0.3032	0.7094	26.0772	35.2241	0.0435	1.612	0.2612	1.3508	0.6414	0.206	0.838	0.4748	0.3979	0.3205	0.1275	0.152173	0.847827	209.677	338	54.767	283.233	134.487	43.1007	2086	338	1748	830	266	0.6204
2021	08.21	C	16	700	63485	339	1860	1521	372	400	552	1022	1526	0.1823	0.818	3.6087	4.487	0.449	0.7804	0.2196	0.1841	0.4668	41.7781	43.4296	0.0597	1.2712	0.2317	1.0395	0.5727	0.228	0.8177	0.551	0.4505	0.3986	0.1796	0.219629	0.780371	266.677	339	61.7855	277.214	152.732	60.8742	1860	339	1521	838	334	0.7866
2021	08.21	C	16	900	78630	371	1924	1553	398	433	568	1013	1498	0.1928	0.807	3.9062	4.186	0.4134	0.7257	0.2743	0.2254	0.4228	50.6703	51.8279	0.0563	1.2672	0.2444	1.0228	0.6	0.281	0.8072	0.5866	0.4735	0.4676	0.2214	0.274294	0.725706	292.771	371	71.539	299.461	175.666	82.1445	1924	371	1553	911	426	0.7891
2021	08.21	CS	17	800	68826	377	2347	1970	431	480	722	1341	1973	0.1606	0.839	3.1974	5.225	0.4893	0.8102	0.1898	0.2487	0.5838	34.9764	41.7249	0.0437	1.4212	0.2283	1.1929	0.6092	0.226	0.8394	0.5107	0.4286	0.3718	0.1594	0.189878	0.810122	265.269	377	60.5577	316.442	161.594	60.0758	2347	377	1970	1006	374	0.7036
2021	08.21	CS	17	800	73923	365	2492	2127	413	453	666	1313	2081	0.1465	0.854	4.8706	5.827	0.4457	0.8068	0.1932	0.1881	0.4717	34.7941	36.8249	0.0435	1.24	0.1816	1.0584	0.5867	0.205	0.8535	0.5543	0.4731	0.3486	0.1649	0.193229	0.806771	294.355	365	53.4611	311.539	172.687	60.1986	2492	365	2127	1179	411	0.8065
2021	08.21	CS	17	600	53445	339	2287	1948	396	447	709	1335	1989	0.1482	0.852	3.1484	5.746	0.5113	0.847	0.153	0.2618	0.6331	27.4751	34.0221	0.0458	1.4538	0.2155	1.2383	0.6052	0.189	0.8518	0.4887	0.4163	0.313	0.1303	0.152963	0.847037	233.182	339	50.2497	288.75	141.114	44.1723	2287	339	1948	952	298	0.6879
2021	08.21	CS	17	700	65799	313	2064	1751	350	381	549	1102	1729	0.1516	0.848	4.8364	5.594	0.4506	0.8087	0.1913	0.177	0.4493	37.6171	37.5059	0.0537	1.1753	0.1782	0.997	0.5478	0.191	0.8484	0.5494	0.4661	0.3482	0.1623	0.191301	0.808699	266.315	313	47.4656	265.534	145.885	50.8018	2064	313	1751	962	335	0.8509
2021	08.21	CS	17	800	57408	309	1577	1268	338	363	491	899	1313	0.1959	0.804	3.0729	4.104	0.4653	0.7918	0.2082	0.1972	0.4784	45.3136	46.5936	0.0566	1.2788	0.2506	1.0282	0.5498	0.214	0.8041	0.5347	0.4299	0.3894	0.1674	0.208212	0.791788	241.633	309	60.546	248.454	132.848	51.7286	1577	309	1268	678	264	0.782
2021	08.21	CS	17	800	72121	351	2307	1956	401	442	668	1298	1950	0.1521	0.848	3.7597	5.573	0.4842	0.8175	0.1825	0.2096	0.5402	36.9111	41.1856	0.0461	1.316	0.2002	1.1158	0.5756	0.204	0.8479	0.5158	0.4374	0.3538	0.1547	0.18249	0.81751	266.717	351	53.4031	297.597	153.515	54.316	2307	351	1956	1009	357	0.7599
2021	08.21	CS	17	800	67915	333	1832	1499	366	396	547	1005	1505	0.1818	0.818	3.5585	4.502	0.4483	0.7819	0.2181	0.2001	0.4759	45.3461	48.1353	0.0567	1.2973	0.2358	1.0615	0.5856	0.232	0.8182	0.5517	0.4514	0.3954	0.1785	0.218142	0.781858	256.687	333	60.5289	272.471	150.323	59.4383	1832	333	1499	827	327	0.7708
2021	08.21	CS	17	700	58160	295	1773	1478	329	357	518	992	1489	0.1664	0.834	3.6568	5.01	0.4716	0.8078	0.1922	0.1894	0.5029	39.3506	41.9665	0.0562	1.2793	0.2129	1.0665	0.5635	0.205	0.8336	0.5284	0.4405	0.3636	0.1602	0.192126	0.807874	230.595	295	49.0835	245.917	129.946	47.2532	1773	295	1478	781	284	0.7817
2021	08.21	CS	17	900	63001	325	1753	1428	357	385	524	979	1450	0.1854	0.815	3.4803	4.394	0.458	0.7878	0.2122	0.1961	0.4645	44.1577	44.7879	0.0491	1.2451	0.2308	1.0143	0.5498	0.215	0.8146	0.542	0.4415	0.3915	0.1728	0.212193	0.787807	261.023	325	60.2539	264.746	143.497	56.1751	1753	325	1428	774	303	0.8031
2021	08.21	CS	18	800	74682	355	1903	1548	393	427	593	1058	1516	0.1865	0.813	3.1484	4.361	0.4541	0.75	0.25	0.2196	0.5125	48.2832	54.4874	0.0604	1.3873	0.2588	1.1285	0.616	0.282	0.8135	0.5459	0.444	0.458	0.2034	0.250022	0.749978	255.893	355	66.2244	288.776	157.633	72.1939	1903	355	1548	845	387	0.7208
2021	08.21	CS	18	700	71382	347	1951	1604	382	413	572	1071	1599	0.1779	0.822	3.7159	4.622	0.4514	0.7805	0.2195	0.1933	0.4676	44.5416	46.1412	0.0636	1.26	0.2241	1.0359	0.5683	0.227	0.8221	0.5486	0.4511	0.4	0.1804	0.21944	0.78056	275.397	347	61.7166	285.283	156.515	62.6058	1951	347	1604	880	352	0.7936
2021	08.21	CS	18	800	76154	358	2501	2143	406	442	664	1365	2106	0.1431	0.857	4.7604	5.986	0.4699	0.8157	0.1843	0.168	0.476	35.5756	36.0348	0.0445	1.1821	0.1692	1.0129	0.5369	0.187	0.8569	0.5301	0.4542	0.3477	0.1579	0.184316	0.815684	302.851	358	51.2451	306.755	162.61	56.5414	2501	358	2143	1136	395	0.8459
2021	08.21	CS	18	900	66392	332	1739	1407	360	383	509	971	1433	0.1909	0.809	3.7194	4.238	0.4542	0.7825	0.2175	0.1635	0.4193	47.2261	43.6047	0.0525	1.1412	0.2179	0.9233	0.504	0.201	0.8091	0.5458	0.4416	0.3984	0.176	0.217447	0.782553	290.922	332	63.3836	268.616	146.622	58.4198	1739	332	1407	768	306	0.8763
2021	08.21	CS	18	800	57325	324	1585	1261	353	377	503	927	1324	0.2044	0.796	2.8456	3.892	0.4782	0.793	0.207	0.1903	0.4732	45.4995	45.0216	0.0569	1.2437	0.2542	0.9895	0.5163	0.205	0.7956	0.5218	0.4151	0.3967	0.1647	0.206998	0.793002	260.513	324	66.2309	257.769	134.506	53.3527	1585	324	1261	658	261	0.804
[truncated: 418 more rows]
[truncated: 5 more columns]
